# Supplementary material for: Evaluating the Immune Response in Treatment-Naive Hospitalised Patients With Influenza and COVID-19
Source: Front Immunol. 2022 May 19;13:853265. doi: 10.3389/fimmu.2022.853265 (PMC9160963; doi:10.3389/fimmu.2022.853265)
Supplement: Supplementary file 4 [file Table_3.xlsx]

## Sheet: DGE results Survived vs Died
						COVID-19 non-survivors																COVID-19 survivors
Gene	PValue	Log10_PValue	FDR_PValue	Log_fold_change	Log_CPM	CoV003	CoV005	CoV008	CoV016	CoV021	CoV029	CoV031	CoV042	CoV046	CoV051	CoV052	CoV054	CoV055	CoV057	CoV061	CoV065	CoV001	CoV002	CoV004	CoV006	CoV007	CoV009	CoV010	CoV011	CoV012	CoV013	CoV014	CoV015	CoV017	CoV018	CoV019	CoV020	CoV022	CoV023	CoV024	CoV025	CoV026	CoV027	CoV028	CoV030	CoV032	CoV033	CoV034	CoV035
TXNDC2	1.44405e-23	-22.8404	3.44406e-19	-3.19899	1.05212	-0.210259	-0.359403	6.63099	0.372892	0.384776	0.370603	0.172568	-0.737812	-0.669215	-0.469041	0.588286	0.173472	-0.437546	-0.219345	0.278916	0.613899	-0.0985484	-0.774291	-0.981364	-0.133253	0.971211	-2.05477	-0.343602	-0.480901	-0.0888379	-0.0888379	-0.0888379	0.0857785	-0.810066	-1.00099	-0.30993	-1.1593	0.270266	-0.201723	-1.79186	-0.921153	1.22594	0.279011	-1.34179	-0.00302801	1.04647	-0.940975	-0.642502	-0.340202
CLNK	4.2854e-17	-16.368	5.11034e-13	-2.94815	1.49444	-1.98546	-0.947725	0.101297	1.23675	0.764255	0.207438	0.251571	2.41652	-0.316656	0.172184	6.93624	-0.0500672	1.64218	0.679692	-1.70179	-1.6529	-1.11477	0.239198	-0.0522671	0.463973	1.66581	-0.919084	0.660273	-0.0663022	-0.406389	-0.406389	-0.406389	0.0857785	-0.810066	-0.0060182	0.786078	-1.00687	0.889738	0.891129	0.0969434	-1.15788	1.72718	-0.172629	-1.07593	0.217855	-1.69514	3.4989	-0.064397	-1.8352
AC012368.1	2.09718e-16	-15.6784	1.66725e-12	-1.20565	5.67111	5.74286	6.36147	6.5285	7.37263	6.14003	7.21423	6.25128	6.0709	5.59648	5.47212	5.2379	7.0751	6.48742	5.92663	7.68791	6.68131	6.90108	5.26784	4.60939	4.94148	3.99126	6.03783	4.94687	5.34519	5.22165	5.22165	5.22165	5.13565	4.77513	4.67181	4.76873	4.85981	4.93153	4.56128	5.44188	5.25736	4.94145	5.10376	4.29142	5.88339	6.2288	5.10963	5.11035	5.20131
AF064858.1	2.70266e-15	-14.5682	1.61146e-11	-1.92648	1.05676	0.268194	-0.178042	2.23384	2.07146	1.56344	1.02167	0.00026349	1.0232	1.58878	2.54691	4.42331	1.429	3.08991	3.91078	0.944893	-0.11373	0.491782	-1.52944	-1.11807	-0.133253	2.55522	0.42792	0.8413	0.0710817	0.072781	0.072781	0.072781	1.39864	-1.0289	0.741962	0.490755	-0.00497292	0.596853	0.530233	-0.378507	1.33687	1.56743	0.825752	-0.333327	0.578409	1.17674	-0.401577	0.702481	-0.257968
AC079760.2	1.76396e-12	-11.7535	8.41407e-09	-2.76681	1.26522	-0.101032	-1.10085	1.72564	2.05553	3.72769	0.148674	4.14961	-1.62542	2.41387	2.51325	4.04159	-0.314709	0.747634	4.94686	3.83631	0.17154	2.0012	-1.10301	-2.42696	-0.191315	0.437518	-2.37587	-1.67722	-0.687082	-1.25112	-1.25112	-1.25112	0.00719594	-4.36345	0.234215	0.64596	0.317335	0.691125	-0.682158	-0.378507	-1.44124	0.451383	1.62153	-0.657365	-3.47624	3.45665	-2.58505	-0.734244	-1.10287
IFNG-AS1	2.72445e-12	-11.5647	1.08297e-08	1.63307	2.39026	0.805843	1.35307	1.68444	0.320525	0.199779	0.517174	0.251571	1.88191	1.41131	0.676689	-0.0751855	1.66822	1.1657	1.38668	-0.664443	0.480968	1.58491	3.24184	3.42198	2.22905	1.82618	1.76995	2.35597	1.63323	2.49101	2.49101	2.49101	2.09359	2.79744	2.29871	1.74858	3.44961	2.70414	3.25253	3.57038	1.66237	1.42552	2.45937	1.96615	2.77798	0.903261	2.46451	2.28205	1.27001
LINC00513	6.60284e-12	-11.1803	2.24968e-08	-2.05635	0.462916	1.92131	-2.70843	1.76569	-0.345257	0.624202	1.20588	0.530334	-0.737812	-0.963545	3.14994	4.44183	-0.314709	1.38939	1.09899	0.944893	0.255338	0.151924	-0.774291	-1.11807	-0.599443	0.10364	-1.20825	-0.343602	-0.927723	-1.3847	-1.3847	-1.3847	-0.583288	-1.43568	-0.376507	0.316818	-1.52308	-0.455151	-0.885928	-1.09246	0.648019	1.49822	0.222523	-0.598049	-1.11613	0.903261	-0.940975	-1.809	-0.106352
COL9A2	2.76079e-11	-10.559	8.23062e-08	-1.55224	3.13601	1.43292	3.69419	5.19896	4.35091	3.32576	6.5205	2.40983	4.91346	3.45386	1.88262	4.23446	3.23014	4.1381	2.6465	3.12419	2.94992	4.76243	0.966943	2.23859	3.12374	3.10135	2.27835	2.3106	2.39205	2.79893	2.79893	2.79893	1.51681	1.49467	1.88841	2.48405	2.10082	2.10565	1.75418	1.69219	2.15187	3.52369	2.49558	2.07038	2.7159	4.95804	2.36881	1.80004	1.69851
DANCR	4.55875e-11	-10.3412	1.18209e-07	0.964599	2.35028	1.86857	1.9485	1.409	0.150949	0.624202	0.772023	1.84849	1.69812	1.1346	1.42043	1.5306	2.01492	1.45686	1.96268	1.62749	1.77245	1.72028	2.54263	3.15902	2.65689	1.95322	2.29256	2.37077	2.16532	2.67851	2.67851	2.67851	1.8224	2.87842	2.75907	2.35498	2.6747	2.90764	3.15617	2.50936	2.53671	1.38775	1.80584	2.42516	2.4034	1.47568	2.47476	2.12121	1.94411
CYP19A1	4.95633e-11	-10.3048	1.18209e-07	-2.12754	1.41842	0.965039	0.907541	1.45871	1.39706	2.29858	0.691974	1.29825	0.0572788	2.05952	3.05955	5.73861	0.53757	3.07924	2.83579	1.28847	2.0081	0.491782	-0.0860906	-1.43782	1.33928	2.29228	-1.5703	0.963568	1.67694	-0.406389	-0.406389	-0.406389	-0.0759148	-2.25755	1.31289	1.00265	0.428479	0.596853	0.891129	-1.51931	1.73344	2.12166	1.0039	-0.333327	-0.77311	0.123742	0.250927	0.347199	1.67776
AL121985.1	1.31491e-10	-9.8811	2.85096e-07	-2.06805	3.85372	6.95873	0.737267	4.29283	2.98113	4.55223	1.41979	5.63213	0.719555	4.44683	2.74842	3.59733	3.67005	7.18211	5.18509	6.74766	3.44529	3.27349	3.70421	3.66008	2.70543	2.53214	2.97762	3.89126	1.85873	1.64726	1.64726	1.64726	1.97472	3.02077	3.6332	1.48629	2.53265	3.38289	0.922711	3.82999	2.22768	3.77112	2.98596	1.52075	1.1874	4.7884	2.25447	2.02656	5.5254
CD163L1	1.50851e-10	-9.82145	2.87162e-07	-2.07307	0.959339	-1.36402	-0.68301	0.531227	1.86758	0.951733	1.88336	1.14113	0.455377	0.839462	2.3126	5.31525	0.240899	3.38659	0.739269	0.199848	-0.767533	3.20126	-0.774291	-1.62891	0.572632	2.71744	-1.05644	0.337377	-0.387901	0.020894	0.020894	0.020894	-0.710329	-1.78886	0.177802	0.913783	0.373977	1.11051	0.792012	-1.29015	0.719782	2.05092	-0.612047	-0.657365	0.45352	0.627592	-1.05432	-0.064397	-0.180169
SLC25A23	1.56524e-10	-9.80542	2.87162e-07	0.993921	3.45798	3.06049	3.2317	2.6944	2.14859	1.11763	2.31607	2.93761	2.88318	2.82167	2.5798	1.99911	3.04447	2.94471	2.42856	2.36746	1.88196	2.67002	4.51114	4.31631	3.71987	3.45423	3.14362	3.72257	3.52345	3.46548	3.46548	3.46548	2.72923	4.43308	3.70482	2.98347	3.46273	4.20411	4.17536	3.04894	3.02153	3.21412	3.52482	3.5057	3.54697	2.26244	3.93359	3.8135	3.2828
PFKFB2	1.74069e-10	-9.75928	2.96539e-07	-1.98866	6.02838	7.04221	4.56036	6.9743	7.31733	8.90292	7.13082	5.77436	4.80103	5.79046	9.01243	8.80516	5.24725	5.87639	7.63365	5.12886	6.37556	7.13958	3.78747	4.17717	5.06907	3.92637	4.62843	3.86011	5.06787	4.81821	4.81821	4.81821	5.70602	4.38123	3.34378	5.22477	3.55135	3.69116	3.3014	3.12042	6.2428	5.15885	5.46044	3.5225	3.96433	8.1019	3.93731	4.07907	5.83975
ADAMTS3	1.91524e-10	-9.71778	3.04523e-07	-2.30657	0.824202	-0.101032	-0.947725	1.35751	0.734863	3.92714	0.370603	0.763856	-1.39889	0.468006	4.10703	4.7135	-1.23007	1.31861	1.1872	-1.1949	-0.0122418	-0.646469	0.310227	-2.42696	-0.380995	1.76811	-2.78952	-0.667472	-0.480901	-1.88094	-1.88094	-1.88094	1.0127	-1.15218	0.234215	0.449197	-0.627484	-0.596517	0.047814	-1.79186	1.46769	0.718075	0.825752	-0.486267	-0.496185	0.123742	-0.835885	-1.30831	-0.180169
EPHA4	2.4101e-10	-9.61796	3.53548e-07	0.934623	3.28191	2.34464	3.12351	3.2964	2.45829	1.70922	2.26165	1.79674	2.82827	1.91161	2.62778	1.2655	3.14469	2.39328	2.25573	2.69029	2.21061	3.43967	3.97402	3.56838	2.95333	3.29884	3.34797	3.59595	3.50538	3.23441	3.23441	3.23441	2.61463	3.99844	3.70482	2.96884	3.53281	3.44734	3.90193	3.58489	3.75218	3.26709	2.62106	3.45408	3.98327	1.72318	3.19225	3.71287	3.67177
PCOLCE2	2.52005e-10	-9.59859	3.53548e-07	-2.11182	1.70049	1.1084	-1.46663	2.85153	1.51825	0.199779	0.421133	0.397675	-1.03081	2.31639	5.89605	3.37452	-0.765681	1.83201	5.00869	0.944893	0.900849	0.0731682	0.876222	0.0786146	0.0781158	1.76811	-1.37795	1.70957	0.255363	-0.911628	-0.911628	-0.911628	1.09099	-1.28697	1.88841	0.682286	0.718241	1.57349	1.17957	-1.79186	2.15187	1.30911	1.78649	-1.34179	1.28837	-0.0597428	-0.129002	-0.397819	1.45205
SEMA6B	3.42299e-10	-9.46559	4.23033e-07	-1.66547	2.16915	2.9506	-0.265875	2.6944	3.09463	5.7639	2.40663	1.43992	0.566917	2.71096	4.60733	3.02757	1.39979	3.72439	2.95366	1.71539	1.62272	2.81017	1.41656	0.641282	1.25483	2.78732	0.375474	1.79989	2.63302	1.61262	1.61262	1.61262	2.01544	-1.43568	2.18882	2.4423	0.921926	1.41677	0.7574	0.0135706	2.5167	2.95475	2.17675	1.54727	-0.127599	1.83264	1.14619	0.737054	2.43919
SMPDL3A	3.4645e-10	-9.46036	4.23033e-07	-1.32254	3.25336	3.68139	1.57153	2.36999	3.33137	4.06219	2.74091	3.48723	3.13018	2.8797	5.7338	6.56083	2.61965	4.10168	4.3149	2.80159	3.41828	3.24683	2.28494	2.9696	2.29397	3.40427	2.70755	2.58912	2.39205	2.93131	2.93131	2.93131	3.10435	2.4613	3.4065	2.96884	1.557	1.68461	1.48476	1.58075	3.20775	2.16696	3.19123	3.41142	2.28621	1.09121	2.02259	2.18521	3.48738
ATIC	3.63811e-10	-9.43912	4.23033e-07	0.740299	4.59971	3.97753	4.54753	3.87441	3.68723	3.31441	3.15332	3.89046	4.48684	4.13526	4.01381	3.81889	4.29938	4.23738	3.89777	3.96741	3.6983	4.38845	5.06971	5.08468	4.77521	4.73491	4.84882	4.7083	4.22891	4.60569	4.60569	4.60569	3.99221	5.87893	4.8197	4.24801	4.71658	4.6557	4.54362	5.00799	4.40781	3.79295	4.29403	4.92785	4.54397	3.69272	4.99501	4.90142	4.23728
LINC01127	3.72482e-10	-9.4289	4.23033e-07	-1.50616	4.30956	4.83459	4.97625	6.45385	5.7869	5.81312	6.8337	4.6243	4.73091	4.70932	5.4765	4.64324	4.41336	5.2427	4.49851	4.52476	4.78643	5.19786	3.65047	3.81362	3.71987	2.92656	4.08762	3.39329	4.58779	3.46062	3.46062	3.46062	3.82475	1.09469	3.25113	3.16771	2.54504	3.77965	1.09893	2.12846	3.2325	3.43389	4.31781	1.86439	2.72493	5.92791	3.39477	3.50791	4.99039
HPGD	6.04544e-10	-9.21857	6.5538e-07	-2.1417	3.76787	1.1084	0.643948	3.78953	2.60781	6.05393	2.51529	5.06256	2.53099	2.01879	7.18322	7.83801	2.55488	3.23149	4.66136	3.04722	1.18351	1.46664	2.0353	2.3849	1.73184	2.11727	1.62023	2.16528	2.9144	1.4651	1.4651	1.4651	3.34701	1.9641	1.79774	1.99952	2.65198	2.68898	1.77163	1.02175	4.51759	3.41524	3.39026	2.15039	2.49075	2.88762	0.983413	2.04047	1.27001
NELL2	8.10883e-10	-9.09104	8.4085e-07	1.62617	3.96713	3.40409	3.15767	2.34376	2.80174	0.548724	1.86523	2.88901	2.27586	1.64339	1.85601	1.17985	3.48777	2.64544	3.52718	1.56576	2.07881	3.52352	3.98492	4.11752	4.9798	4.25356	4.16691	3.69341	3.37213	3.95117	3.95117	3.95117	2.62782	5.27874	4.71457	2.75527	3.25976	4.17721	4.67923	3.59926	3.61777	2.39348	2.30471	4.48557	4.68722	0.432747	5.08475	4.48207	3.98206
CD27	9.92591e-10	-9.00323	9.86388e-07	1.22475	4.78478	3.98374	4.68564	4.44242	2.83945	1.9335	3.19748	3.5972	3.96242	3.21332	3.70644	4.26597	4.03547	3.08991	3.56059	3.49091	3.71319	4.26544	5.43806	5.86305	5.10117	4.71712	4.53887	4.7457	4.24714	4.9402	4.9402	4.9402	4.08122	5.71444	5.00742	4.80006	4.31153	5.92068	5.4188	4.0447	3.64567	3.61642	5.1135	4.71192	4.64975	3.68545	5.202	4.67941	4.40443
OXCT1	1.09051e-09	-8.96237	1.04035e-06	0.829022	3.60939	2.93786	3.77344	2.42104	2.43385	2.01988	2.0043	2.91351	3.09339	3.14871	2.87309	3.18971	3.41665	2.65983	2.63085	3.0917	2.83205	3.00308	4.17293	4.1289	3.98857	3.75758	3.62566	3.75679	3.29006	3.88014	3.88014	3.88014	3.01681	4.74522	3.82907	3.2365	3.89887	3.88977	3.71616	4.0861	3.39476	2.55555	3.13112	4.20037	3.47382	2.37529	4.31362	4.0757	3.35644
AQP3	1.27162e-09	-8.89564	1.16646e-06	1.14959	4.81098	4.19662	4.55075	4.68103	2.88524	2.32144	2.6903	3.5972	3.64417	3.69917	4.18926	2.80252	4.31119	3.91037	3.98649	3.67758	3.95793	3.92773	5.64799	5.44311	5.01393	4.63556	4.43699	5.01915	4.84651	4.66817	4.66817	4.66817	4.39076	6.05298	5.43049	4.93978	4.49828	5.39545	5.40907	4.57834	3.33888	4.05032	5.32782	5.01829	4.71469	4.11184	5.17081	4.75938	4.40127
RN7SKP296	1.33874e-09	-8.8733	1.18256e-06	-1.2708	2.31414	3.51977	1.19755	1.35751	3.65587	4.39949	4.52351	2.32104	2.79429	2.59104	3.53252	2.60311	2.54157	2.93291	3.27881	2.81492	3.03536	3.06544	1.75885	1.63999	-0.0774376	0.164932	1.40163	1.82161	2.1026	1.48439	1.48439	1.48439	2.23822	0.95233	1.41403	2.30926	1.92243	0.596853	1.58685	1.39557	3.09083	1.84335	2.06874	0.764258	2.55295	3.49045	1.36037	0.515975	2.01197
AC008957.3	1.87418e-09	-8.72719	1.5964e-06	-1.83563	0.743246	2.20272	-1.10085	0.435151	1.17909	4.20424	0.691974	-0.421936	-0.737812	1.53201	3.03603	2.44689	0.173472	2.64544	1.96268	1.12689	-0.222901	3.33385	-0.281141	-1.62891	-0.954155	1.10233	-0.378989	-1.67722	0.255363	-0.0329289	-0.0329289	-0.0329289	-0.849646	-0.810066	0.0578933	-0.240281	-1.32975	-0.672759	-2.23265	-1.09246	1.33687	0.890028	0.385758	-0.109729	-3.47624	0.361476	-1.05432	-1.05071	1.15464
GCSAM	2.27394e-09	-8.64322	1.83263e-06	1.01119	3.28718	2.91203	2.9589	2.49439	2.10281	1.56344	1.71131	2.64748	2.40155	2.07947	2.40728	1.30648	2.63226	2.24848	3.00311	2.29322	2.88563	1.9135	3.18628	3.57948	3.15903	3.07764	3.76469	3.11409	2.75019	3.8874	3.8874	3.8874	2.60131	4.06223	4.04157	2.93913	4.2561	3.80447	4.09448	3.93001	3.69991	2.43111	2.01986	3.7873	3.75092	1.57353	3.39477	3.69099	2.49954
KCNQ5	2.30519e-09	-8.63729	1.83263e-06	0.94099	2.24525	1.06218	1.41086	0.621302	1.34557	1.44354	1.11671	0.592353	1.69812	1.01542	1.4913	2.65163	1.21094	1.72661	2.08254	1.24974	0.847844	1.77107	2.79872	3.02746	2.56342	2.44834	2.12795	2.29516	2.18059	1.95437	1.95437	1.95437	1.75186	2.45075	2.0226	2.22558	2.6172	2.20486	3.22112	2.36547	2.63279	1.95087	1.48412	2.29039	2.04782	1.09121	2.00855	2.41611	2.09255
TRAV4	2.45776e-09	-8.60946	1.89089e-06	1.56783	0.690278	-3.1008	0.057311	-2.81923	-0.345257	-0.943459	-0.347488	-1.02133	-1.03081	-1.83296	-1.65233	-1.96341	0.240899	-0.0156235	0.175148	-0.523591	-0.341015	0.491782	1.09315	0.412245	0.885104	1.35991	0.42792	0.275766	0.196513	0.813664	0.813664	0.813664	-0.258045	2.27048	1.02383	-0.30993	1.28893	0.596853	1.23093	1.42813	1.42538	-0.300308	-1.60766	1.58615	0.496362	-3.13743	0.983413	1.45017	-0.520227
PLK3	3.10657e-09	-8.50772	2.31536e-06	-0.858338	4.86421	5.43583	4.39837	6.46302	5.23359	6.09265	6.04433	4.6243	4.81239	5.68539	5.7911	5.61761	5.00695	5.26875	5.9473	4.57262	5.06712	5.46405	5.03606	4.48805	4.35089	4.11678	4.13571	4.91944	4.96805	3.91254	3.91254	3.91254	4.76073	3.74998	4.68199	5.23856	4.35086	4.37005	4.50502	3.73559	5.26337	4.81197	5.11932	4.11654	4.68953	5.46679	4.27308	3.8336	5.08992
CD55	3.29573e-09	-8.48205	2.38191e-06	-1.13912	9.09236	9.97041	8.34401	9.81453	10.2516	11.2824	9.39227	9.34653	8.40025	9.58	11.0815	9.87626	9.21885	9.74586	10.2516	8.87296	9.66918	9.48019	9.22034	8.31446	8.35323	7.32063	9.03386	8.29226	9.39652	8.49303	8.49303	8.49303	9.52563	8.0535	8.70616	8.90162	7.93562	8.88435	7.49215	8.12909	9.80208	8.51504	9.26773	7.21988	8.27238	9.56892	8.03828	8.07328	9.63002
NPM1	3.67057e-09	-8.43527	2.57479e-06	0.741519	5.59458	4.79628	5.30823	4.73246	4.43337	4.31659	4.32882	4.79225	5.37848	4.84658	5.33675	4.73992	5.31921	5.18915	5.30576	5.15267	4.96815	4.94767	5.76006	6.14748	6.01765	5.83254	5.81843	5.50363	5.20854	6.02717	6.02717	6.02717	5.36565	6.90564	5.79169	5.7015	5.55147	5.78119	5.96343	5.46952	4.84894	4.81553	5.22374	5.67119	5.32351	4.49151	5.59047	5.54168	5.32319
CEACAM1	4.08461e-09	-8.38885	2.78337e-06	-1.24241	7.97927	10.0284	8.64596	7.48828	8.48134	10.0217	7.19711	9.32486	5.79262	8.26487	9.46433	8.09355	7.64129	9.42503	8.5234	9.26036	8.78184	9.64582	7.49327	7.53175	6.99532	5.81711	8.10555	7.25156	8.39059	7.49412	7.49412	7.49412	7.03242	7.48234	7.36795	7.145	6.50787	7.30725	5.55728	7.36122	7.26875	7.6314	8.32608	6.805	5.89844	9.25573	7.02029	6.66675	8.72416
SFRP1	4.37012e-09	-8.35951	2.89521e-06	-2.11379	0.21559	-4.36345	-3.31059	0.101297	0.320525	-0.0124783	2.54976	4.71072	-0.104251	-1.1368	-1.37515	-1.61838	-0.414934	1.48945	0.0861709	0.679439	0.548964	-0.646469	-1.30053	-1.11807	-0.0237012	1.60075	-2.37587	-0.443692	0.196513	-0.147001	-0.147001	-0.147001	-0.358527	-2.56498	-1.13749	0.64596	0.480997	0.142613	-0.071566	-4.36345	-2.96017	0.834956	-0.0987905	-2.6894	-0.337286	-1.41933	-1.81233	-0.832218	-0.619431
TMEM156	4.95103e-09	-8.3053	3.19141e-06	0.909289	2.45273	1.81383	2.42593	1.64203	1.26473	1.74347	0.370603	1.26055	1.83811	1.64339	1.18417	2.119	1.87336	1.52131	2.03578	1.71539	1.45564	1.84404	2.85919	3.10629	2.56342	1.97049	2.60879	2.62662	2.0537	2.70341	2.70341	2.70341	2.2034	2.84657	2.50767	2.13674	2.7408	2.46713	2.51425	3.28056	2.27609	1.66538	2.23502	2.80066	2.48011	1.44153	3.24111	2.83053	1.85452
PPAT	5.33551e-09	-8.27282	3.34873e-06	0.783167	2.79121	2.41989	2.26287	2.67349	1.63006	1.80964	1.34324	1.71547	2.47489	1.97687	2.37015	1.78379	2.10815	2.57127	2.14994	2.25462	1.93375	1.95802	2.72265	3.72147	2.97329	3.27124	2.90548	2.8332	2.41804	2.96602	2.96602	2.96602	2.16772	3.83359	2.82484	2.6583	2.8346	3.0685	2.8128	2.65403	1.86587	2.2949	2.74656	3.07574	2.5731	2.20253	3.03488	3.0038	2.51131
PCBP1-AS1	5.94486e-09	-8.22586	3.50194e-06	-0.920256	8.28669	9.59804	8.92372	8.65133	9.42529	8.55426	9.8328	9.13329	8.05076	8.9437	7.55864	7.1818	8.6599	8.75004	8.00489	9.54298	9.75141	8.74083	7.51598	8.57898	7.27336	7.00793	8.38774	8.17481	8.39714	7.80025	7.80025	7.80025	8.51777	7.69119	7.25874	8.10621	7.52517	7.98775	7.0022	8.12692	8.11397	8.14197	8.24266	7.57652	7.47192	9.55051	8.04022	7.83773	8.96068
ARID5A	5.99072e-09	-8.22252	3.50194e-06	-0.81798	6.3826	7.54849	6.40834	7.45499	7.08397	7.83371	6.87847	6.81982	5.66524	6.72404	7.34564	6.85654	6.2545	6.54862	7.15316	6.61109	7.19653	7.01344	6.78614	5.71748	5.70597	5.13021	6.16784	6.474	6.62029	5.39599	5.39599	5.39599	6.57861	5.76642	6.12763	6.55479	5.86602	5.80686	5.59085	5.9365	6.7487	6.36765	6.41701	5.43693	5.58898	7.23644	5.7382	5.71103	6.6872
SORT1	6.0418e-09	-8.21883	3.50194e-06	-1.23213	7.52851	9.23144	6.93819	8.67452	8.52773	8.7134	7.81196	8.24668	6.71386	7.55145	9.9849	9.25738	7.20159	7.41517	7.70962	7.86812	8.25568	9.01731	6.76812	7.12964	6.23301	6.96765	6.74474	6.5154	7.26823	6.80488	6.80488	6.80488	7.28957	7.13263	6.17973	6.79403	5.76772	6.15858	5.7379	5.90069	7.2695	7.18929	7.62675	6.85891	6.50939	9.2588	5.96329	6.08269	7.78408
TMED8	6.16694e-09	-8.20993	3.50194e-06	-1.05631	6.5622	6.84218	5.7599	7.311	7.32898	8.72336	7.94445	7.09552	5.99564	7.16889	8.26964	7.82705	6.26466	6.48034	7.19897	6.94011	6.63318	6.95972	6.25123	5.78732	5.88522	5.08534	5.88325	5.79194	6.7052	5.75875	5.75875	5.75875	6.40367	5.6351	6.0784	6.34633	5.96152	6.31481	5.23918	5.19699	6.93077	6.03039	6.96747	5.61041	5.35586	7.73069	5.68401	5.51204	7.18434
IKZF2	6.43936e-09	-8.19116	3.5716e-06	1.11741	5.1846	3.8541	4.3622	2.75535	3.9682	4.48296	3.32237	3.3593	4.45819	4.33098	4.36467	3.76844	4.63946	5.05679	4.05257	4.86302	4.39666	4.04587	5.53762	4.5344	4.46571	4.51422	5.98083	5.11242	5.29874	5.41496	5.41496	5.41496	4.4402	6.17581	4.99727	4.50537	6.16883	4.42824	5.69053	6.00015	6.71178	4.44451	4.22021	5.71351	6.00148	3.40442	5.55468	5.56231	4.53991
ACER3	6.6344e-09	-8.1782	3.59615e-06	-0.882518	5.96833	7.21323	5.53957	6.24835	6.11075	7.45911	5.28336	5.9084	5.21472	6.17576	8.19431	7.56522	5.78788	5.95287	6.78299	6.11444	6.12713	5.87579	5.26784	5.38264	5.32607	5.04515	5.68742	5.18962	5.70191	5.74982	5.74982	5.74982	6.12072	5.68885	5.74513	5.43763	5.62624	5.19015	4.92319	5.42987	6.72274	5.56426	6.16027	5.65223	5.22027	6.39639	5.09641	5.00966	6.24511
TRBV20-1	7.24542e-09	-8.13994	3.84008e-06	1.46497	1.03247	-0.598518	0.594923	-0.719728	-0.730916	-2.28127	-1.62107	0.00026349	0.0572788	-1.33373	-0.0116025	-0.90633	-0.0500672	0.449417	0.679692	-0.820548	0.334534	-0.0985484	1.99275	0.91093	0.798257	1.30652	0.790357	1.11197	0.740489	0.307443	0.307443	0.307443	1.0127	3.49142	2.05428	0.944018	2.1175	0.495988	1.91984	1.1444	0.408454	-0.300308	-0.0285476	1.43815	1.40539	-0.988481	2.23047	1.40788	-0.106352
DAAM2	7.53569e-09	-8.12288	3.90709e-06	-2.39444	4.88226	1.78566	3.723	6.16844	6.67531	4.7078	8.91058	5.74736	6.75418	5.53642	6.05364	8.03226	4.3801	3.71064	2.27599	3.45731	5.23649	6.62298	-0.281141	2.32023	3.10577	3.33929	1.88697	2.18216	3.07821	2.28647	2.28647	2.28647	3.32288	0.794365	1.11678	3.41979	2.28932	2.65039	2.46147	1.02175	0.975706	3.49733	4.78088	0.544972	3.18393	8.26762	2.76939	1.55077	2.56877
POLD2	7.93742e-09	-8.10032	3.95866e-06	0.659917	3.38791	3.14052	3.16608	2.87002	2.19296	2.10138	2.40663	2.71873	3.25201	3.03075	2.81901	2.72905	2.83132	3.1825	2.7515	3.00133	2.62711	2.90417	3.83642	4.01092	3.77777	3.39151	3.20502	3.65158	3.49931	3.19398	3.19398	3.19398	3.01681	4.33033	3.6332	3.86119	3.58773	3.62901	4.00141	3.11042	2.6695	3.25665	3.44065	3.70726	3.33909	2.52956	3.56755	3.52779	3.01984
DGKE	7.96712e-09	-8.0987	3.95866e-06	0.713069	4.24197	3.44968	3.74001	2.36999	3.42115	3.1833	3.14583	3.87806	4.03211	3.78061	3.55751	3.85388	3.91162	3.91638	3.91724	3.76943	3.61351	3.76814	4.02242	4.25535	4.37109	4.42934	4.3135	4.00953	3.52345	4.59686	4.59686	4.59686	3.57524	5.06878	4.68957	3.84125	4.55143	4.38658	4.27966	4.54533	4.52762	3.88394	3.39665	4.55744	4.60396	3.06633	4.63713	4.40084	3.74838
SLC1A3	8.23755e-09	-8.0842	4.0095e-06	-1.62011	3.14786	3.80583	2.00589	2.79459	3.82518	6.19521	3.42498	2.91351	0.767046	3.6797	5.6019	4.7173	2.07158	5.30123	4.55348	3.41418	2.70369	6.00472	2.5278	1.99519	1.77796	3.58332	2.65352	1.75544	3.10245	2.18403	2.18403	2.18403	2.03538	2.23401	2.85213	2.01385	1.78297	1.3605	1.12631	1.96053	3.51057	2.62212	2.862	1.89568	0.65604	2.49667	1.50742	0.15603	3.5515
IL1RAP	8.41616e-09	-8.07489	4.01451e-06	-1.33659	6.92844	7.75101	6.08462	6.52559	8.20129	9.49649	8.94498	7.00864	7.34677	6.93851	8.81741	6.96453	7.14001	7.17148	7.83567	7.35653	7.60414	7.7758	6.30873	6.01482	4.50965	4.61923	6.29329	6.20218	6.77851	5.91083	5.91083	5.91083	6.95342	5.57563	5.91438	6.72116	6.00027	5.29144	5.33472	5.48507	7.54794	6.35057	6.73168	5.15387	6.98316	8.03906	5.58812	5.00435	6.72687
FBXO5	9.58313e-09	-8.01849	4.37414e-06	0.918645	2.52989	1.50381	1.64562	1.98513	0.886656	1.11763	0.919916	2.10402	1.92442	1.47292	2.05629	1.69397	1.5928	2.49307	2.03578	2.29322	1.18351	2.02232	2.82321	3.29984	3.1356	2.62231	2.24949	2.67515	2.26893	2.86664	2.86664	2.86664	2.05504	4.00927	2.40082	2.5641	2.65198	2.5365	2.84613	2.69475	0.915854	2.2535	2.47154	2.68602	2.03334	1.40655	2.67475	2.41611	2.06086
ST6GALNAC3	9.66124e-09	-8.01497	4.37414e-06	-1.25173	3.72013	3.33773	2.79493	4.56097	4.60738	5.98581	4.5119	3.97437	3.66312	4.14948	6.19834	5.68716	2.72936	3.74478	4.54932	3.48258	3.69079	3.89948	2.5278	2.75151	2.89175	2.66536	2.63133	2.91631	3.18802	2.82942	2.82942	2.82942	4.11908	2.57256	3.03791	3.90026	3.22169	3.60095	1.73652	2.06775	4.91922	3.71121	4.00683	2.27461	2.52218	3.9081	2.45418	1.55077	4.02375
NR1D1	9.72032e-09	-8.01232	4.37414e-06	0.905394	3.12346	2.26526	3.0617	2.51803	1.26473	1.35768	1.98763	2.0608	2.38643	2.54875	2.21128	2.77358	2.72936	1.69901	2.72227	2.94183	1.77245	2.68334	4.38931	3.1883	3.0379	3.4357	3.45293	3.55114	2.81031	2.76779	2.76779	2.76779	2.82397	3.60998	3.96446	2.8381	2.80401	3.17021	3.35447	2.98472	2.53671	2.70124	2.39693	3.42221	4.03141	2.28187	3.25307	3.06632	3.269
RUNX1	1.00465e-08	-7.99798	4.43721e-06	-0.754775	7.82505	8.84897	7.66778	8.5539	7.86492	9.35272	6.8711	8.57631	6.99322	8.47567	9.19933	8.67403	7.19098	8.27419	8.69495	8.43043	7.92959	8.19182	8.05631	7.40301	7.06091	7.20227	7.64788	7.43625	7.80337	7.48547	7.48547	7.48547	7.45598	7.50992	7.70477	6.9701	7.05111	7.51135	6.9476	7.42412	7.73869	7.68931	7.76697	7.5197	7.14925	8.75333	7.26031	7.22375	8.20123
AC012150.1	1.08706e-08	-7.96375	4.71387e-06	-1.69721	0.0699515	0.860883	-0.68301	-0.719728	-0.432442	0.695928	1.2624	0.251571	0.334486	-1.33373	2.54691	3.66192	-1.23007	-0.437546	-0.764075	1.08349	1.26664	0.0731682	-4.36345	-0.122448	-1.42555	-0.097601	-1.79229	-1.2573	-1.8002	-1.12886	-1.12886	-1.12886	0.231162	-2.25755	-2.44298	-1.03658	-1.32975	-0.929121	-0.682158	-1.29015	0.0109122	0.296936	-0.718624	-1.55085	0.45352	1.93437	-1.05432	-2.27611	0.0308339
SRM	1.13529e-08	-7.94489	4.83513e-06	0.904942	4.58268	4.23358	4.21585	4.28596	3.1482	2.89412	3.15332	3.26724	4.30975	4.25409	4.07277	3.29529	3.7358	4.21806	3.85127	3.57164	3.41828	4.42062	5.34387	5.66766	4.91764	4.48447	4.00804	4.87338	4.80279	4.56098	4.56098	4.56098	4.28648	5.13948	4.83346	5.24919	4.60566	5.22076	5.61037	3.92432	3.2325	3.71884	4.89597	4.63675	4.00198	3.83763	4.52074	4.18617	4.35629
FGD4	1.25226e-08	-7.90231	5.2397e-06	-0.929617	7.37423	7.33121	7.01357	7.91236	8.48246	9.16802	7.58908	7.71753	6.99072	7.73515	9.19718	8.30804	7.74327	8.04949	8.2037	7.61502	7.50812	7.85112	6.39397	7.03155	6.56821	6.28226	7.45602	6.54997	7.43701	7.17608	7.17608	7.17608	7.14509	6.77427	6.57259	6.91535	6.52282	6.76528	5.28698	6.64355	7.8878	7.65941	7.63556	6.28578	6.38595	8.37245	6.48714	6.27363	7.76361
MROH6	1.34055e-08	-7.87272	5.40864e-06	-1.02485	3.95425	5.38275	4.21179	5.14304	3.61841	4.76311	4.05653	3.62713	3.35661	4.40792	6.43021	5.3646	3.4668	3.3604	4.96881	4.02015	4.53721	3.4475	2.76119	3.48823	3.31315	3.86305	3.11991	3.89126	4.3654	3.13419	3.13419	3.13419	3.5888	2.96253	4.33066	4.00436	2.36113	3.20258	3.4388	2.62623	5.19262	4.29439	4.46812	3.87888	4.53115	4.3742	3.29417	2.97512	4.07621
TTC27	1.34862e-08	-7.87011	5.40864e-06	0.636566	3.37698	2.70199	3.36194	2.28985	2.35794	2.38792	1.90127	2.58783	3.23522	3.17676	2.79119	3.2222	3.17948	2.89692	3.03911	2.91732	2.62711	2.78568	3.41296	3.36541	3.71197	3.73249	3.69149	3.24042	2.97694	3.69388	3.69388	3.69388	2.95535	4.06569	3.51294	3.12215	3.61736	3.62105	3.31336	3.82389	3.56028	2.94177	3.01119	3.58142	3.3797	2.0294	3.67815	3.78486	2.76837
KCNMA1	1.36955e-08	-7.86342	5.40864e-06	-1.99111	3.98007	0.493903	2.58502	6.76794	3.47604	3.91967	3.84611	4.73841	2.66237	4.10639	7.00396	7.75531	1.91525	4.58895	2.01182	0.736581	5.19995	4.21589	0.504468	-0.196218	3.60517	5.48741	-0.919084	3.31122	2.55318	3.59088	3.59088	3.59088	1.72755	3.16332	2.85213	4.00077	2.64048	2.72657	3.05292	3.79297	3.94418	5.56426	5.9338	3.34497	0.217855	4.09547	2.76939	2.0948	1.81707
TIPARP	1.40372e-08	-7.85272	5.40864e-06	-0.784693	6.06053	6.62586	5.85925	5.8218	6.0933	8.08104	6.13794	6.45801	5.9616	6.05505	7.5607	7.34254	5.7377	5.74255	6.53767	6.40511	6.97499	6.37367	6.10283	5.6348	5.29072	5.16999	5.8524	5.79194	5.87726	5.81411	5.81411	5.81411	6.14386	6.09764	5.43651	5.389	5.76772	5.50765	4.94065	5.99608	5.9668	5.67031	6.09686	5.59857	5.81628	6.66688	5.63114	5.27821	6.08693
GOT1	1.40602e-08	-7.85201	5.40864e-06	0.730753	2.71438	2.13735	2.3092	1.191	1.84921	1.77693	1.67012	1.68732	2.30832	2.73631	1.80128	1.59818	2.37148	2.75671	2.12782	2.29322	2.0081	2.1235	3.20504	3.28636	2.56342	2.91768	2.79999	2.93636	2.67674	3.01326	3.01326	3.01326	2.36967	3.54698	2.74942	3.02649	2.37507	2.68135	3.03136	2.87089	2.47584	2.12166	2.69559	3.16405	2.346	1.95872	2.86602	2.69641	2.6562
MYOSLID	1.53068e-08	-7.81512	5.7947e-06	-1.37901	0.291067	0.184364	-0.0952508	1.50677	0.886656	1.31276	0.370603	-0.421936	-0.286173	0.203	3.39142	1.66274	-1.9191	1.93023	1.83196	-0.523591	0.548964	-0.0985484	-2.13746	-0.0522671	-0.0774376	0.936481	-2.05477	-0.343602	-0.480901	-0.637004	-0.637004	-0.637004	-0.849646	-1.60149	0.391316	0.118998	0.373977	-0.326409	-0.201723	-0.918616	-0.381123	1.63346	1.0039	-0.85152	-1.40057	-0.0597428	-1.17735	-1.4567	0.214878
PEBP1	1.57344e-08	-7.80315	5.83969e-06	0.809119	3.59553	3.12936	3.28676	3.13758	2.39639	1.96287	2.40663	2.69065	3.48996	2.74882	2.77707	3.42192	3.39461	2.97953	2.48185	2.70468	2.70369	3.16374	4.32216	4.52008	3.96551	3.41693	3.65895	3.84958	3.55308	3.5132	3.5132	3.5132	3.13239	4.37008	3.73446	3.74149	3.40274	3.57233	4.22371	3.39205	3.02153	2.62212	3.27694	3.79562	3.75533	2.09678	4.04786	3.77242	3.13084
AL160272.1	1.59153e-08	-7.79818	5.83969e-06	-0.789917	3.5472	4.13654	3.57285	4.27906	3.8895	4.06219	3.6429	4.165	4.2525	3.63323	3.35388	5.7026	3.59473	4.00919	3.19618	3.9494	4.49905	3.87066	2.37052	2.91809	2.85636	3.13237	2.95992	3.19121	2.9235	3.07181	3.07181	3.07181	3.86986	3.12401	2.69016	3.56791	3.03232	2.86109	2.84613	3.01718	4.83689	3.53237	3.85253	3.25131	3.08915	3.8178	2.85036	2.97512	3.38871
ROR1	1.71094e-08	-7.76677	6.1827e-06	-1.96544	0.0047253	-3.1008	-1.46663	-0.719728	0.886656	-0.404141	-0.434665	-1.2202	2.15611	-0.963545	-1.14274	4.50482	-0.765681	0.576191	-0.00865644	-0.820548	-1.14334	-2.58525	-1.80165	-0.35614	0.425856	2.05387	-2.37587	0.0733741	-0.687082	-1.3847	-1.3847	-1.3847	-0.710329	-3.49463	-1.00099	0.449197	-0.0790735	0.460736	0.609996	-1.79186	-1.79419	0.834956	-1.41611	-2.26361	-1.97168	-1.41933	1.763	-0.324684	-3.39721
DCUN1D3	1.76436e-08	-7.75341	6.24024e-06	-0.59527	4.34606	5.48702	4.57623	4.54954	4.23545	5.20234	4.06052	5.21325	3.74841	4.39206	4.83557	4.70968	4.47066	5.21618	4.76174	5.254	4.8349	5.25026	4.29615	3.86892	4.01127	3.83975	4.2889	4.22044	4.20298	4.06122	4.06122	4.06122	4.29063	4.06569	3.97277	3.75434	3.94166	3.8798	3.57919	4.01821	4.08671	4.17197	4.45285	4.08747	3.9099	5.17622	4.01312	3.75565	4.75322
ABCD2	1.80101e-08	-7.74448	6.24024e-06	1.04376	3.41169	2.4381	3.08852	2.05144	1.84921	1.35768	1.80942	3.29548	3.13923	2.36595	2.42549	1.94822	3.14469	2.12947	3.03911	1.95092	2.59531	1.84404	3.54399	3.80419	3.77777	3.72742	3.61439	3.37137	2.25457	3.97523	3.97523	3.97523	2.8691	4.47013	3.7098	2.8778	3.71377	3.6643	3.67965	4.21765	3.40568	1.69661	2.2633	3.8996	3.67836	1.44153	4.12148	4.14814	2.77815
ABCE1	1.80535e-08	-7.74344	6.24024e-06	0.709675	4.9246	4.07967	4.7598	3.8373	3.87596	4.0209	3.50329	4.22496	4.96782	4.06197	4.66595	4.05968	4.72141	4.44684	4.66136	4.52881	4.05467	4.3721	5.09256	5.49091	5.41511	5.14549	5.28533	5.0215	4.33844	5.5133	5.5133	5.5133	4.2052	6.03808	5.15536	4.65224	4.98782	4.97434	4.81585	5.20406	4.72363	3.77843	4.66907	5.29941	4.92336	3.79093	5.22495	5.06173	4.67426
HGF	1.86577e-08	-7.72914	6.35693e-06	-1.37867	5.00253	5.72442	3.8898	5.56517	5.97229	7.10042	4.5802	5.06802	4.76054	4.92584	8.34363	6.04749	4.0959	5.9308	5.52261	4.80743	4.88509	5.81507	3.78123	3.45247	4.44203	3.81606	4.74928	3.63327	4.79289	4.54269	4.54269	4.54269	4.87024	3.43365	3.70482	3.55817	3.3683	3.97968	3.00209	3.09022	4.32969	4.525	4.77353	3.87365	3.77722	5.50863	3.48881	3.77242	5.62764
ALG5	2.12469e-08	-7.6727	7.06588e-06	0.680885	2.65691	1.72761	1.96788	1.91563	1.84921	1.63817	1.73147	1.37083	2.79429	2.21185	1.74438	2.0239	2.45903	2.34067	2.63085	2.06686	2.10163	2.30677	2.61455	3.35253	3.10577	2.66536	2.63133	2.81166	2.31115	3.14028	3.14028	3.14028	2.30544	3.18258	2.50767	2.80553	2.88419	2.90108	3.00209	2.89438	2.20285	2.14448	2.31825	2.81709	2.56306	1.21767	2.75264	2.76503	1.89103
LRPPRC	2.1331e-08	-7.67099	7.06588e-06	0.651866	5.51681	4.8277	5.40206	4.48503	4.52589	4.06896	4.40612	4.71421	5.61422	5.03965	5.30267	5.02111	5.35768	5.27811	5.02674	5.01798	4.60666	5.15309	5.74572	5.98905	5.63883	5.61506	5.98958	5.54339	5.05551	5.8236	5.8236	5.8236	5.15628	6.39669	5.63159	4.99498	5.32421	5.48151	5.44893	5.9108	5.31642	4.49423	5.25752	5.84155	5.87123	4.27588	5.86734	5.84782	5.31146
LMO2	2.1667e-08	-7.6642	7.07886e-06	-0.689572	5.83071	6.48296	6.51513	5.91156	6.08547	6.72198	5.56194	6.79201	5.51513	5.52919	6.05364	6.48921	5.80886	6.03795	6.62317	7.1004	6.96647	6.66218	5.86405	5.1679	5.62627	5.33074	6.17073	5.34581	5.4977	5.93993	5.93993	5.93993	5.4045	5.4919	5.74271	5.39586	5.41473	4.97746	5.19298	6.0637	5.57045	5.56426	5.7094	5.46501	4.99233	6.17395	5.13893	4.68607	5.81502
FEN1	2.40339e-08	-7.61917	7.6891e-06	1.08329	2.23159	1.31961	1.16433	1.409	0.734863	-1.17978	1.39472	1.40579	1.33821	1.91161	1.6546	0.0264459	0.828049	2.08751	1.71812	1.16901	1.49064	1.46664	2.9058	3.27275	2.54576	2.56662	1.79013	2.341	2.32495	2.39236	2.39236	2.39236	1.59949	3.7798	1.74046	2.5738	1.8444	2.05926	2.82956	2.12846	0.853411	2.53842	2.49558	2.37423	1.67151	1.72318	2.20606	1.96954	1.94411
P2RY14	2.41796e-08	-7.61655	7.6891e-06	-2.04415	4.95818	8.97497	2.79493	1.9508	3.56876	5.26264	2.24772	8.02286	2.17384	1.01542	2.19013	1.30648	3.49469	4.51965	3.86471	6.31536	8.11556	5.60369	3.05802	5.41861	3.01882	4.51716	3.15922	2.90618	2.65505	3.07817	3.07817	3.07817	6.07329	4.47795	2.31188	4.84081	3.28951	2.99648	2.53483	4.29029	1.73344	4.66578	3.98153	3.64724	2.8123	6.96238	1.24533	2.12121	4.66375
KLF17P1	2.47449e-08	-7.60651	7.76534e-06	-0.870121	1.79107	2.28552	2.50767	1.24866	3.34454	2.53206	3.10777	2.6764	1.17175	2.07947	1.04975	2.56982	1.83023	2.10864	2.44654	3.01294	2.33137	2.82226	1.78402	2.09134	1.25483	0.280216	1.59751	0.923952	1.2257	0.813664	0.813664	0.813664	2.30544	1.01097	0.780357	1.50669	1.37471	2.15059	1.37488	0.840086	1.03317	2.50353	1.80584	1.03171	1.23877	2.74088	1.24533	1.15012	1.85452
SLC5A9	2.64194e-08	-7.57808	8.18314e-06	-1.33161	1.98585	1.19663	2.63438	3.88354	4.09052	2.78323	4.47351	2.79982	2.20865	1.69602	1.59148	1.56479	2.34108	1.69901	1.88568	2.78814	3.41828	3.74292	-1.10301	1.87426	0.737311	1.98756	1.94211	0.61123	2.1343	1.95437	1.95437	1.95437	1.65209	0.0170053	0.780357	1.76561	2.04958	1.82984	1.87211	1.1444	1.50878	2.6383	2.49558	0.00948541	0.217855	3.67078	1.62254	0.867612	1.71896
IGKV1D-33	2.67967e-08	-7.57192	8.19362e-06	2.53826	0.366511	-0.598518	-1.27218	-1.60869	-3.39983	-4.36345	-2.10207	-4.36345	-1.20314	-0.424877	-2.4473	-1.96341	-1.9191	-2.52283	-1.6497	-1.70179	-3.10859	-0.0101368	2.24923	1.22538	0.768106	-0.171443	-2.37587	1.75544	-2.06236	-0.814162	-0.814162	-0.814162	-1.86975	0.0170053	-0.463564	0.944018	-1.00687	1.85721	0.260488	-0.763488	-1.44124	-0.90389	1.57717	-0.997182	-1.97168	0.432747	-0.328455	-1.809	0.325702
ZDBF2	2.72899e-08	-7.564	8.2388e-06	0.956398	2.58416	1.72761	2.3092	1.55328	1.67246	1.21849	0.919916	2.14599	1.98592	0.639025	2.62778	0.887415	2.05294	2.50905	1.65765	1.53388	1.14008	1.95802	2.61455	3.11394	3.64304	3.34592	2.81976	3.26441	1.78074	2.91007	2.91007	2.91007	1.88966	3.13063	2.29871	2.05599	3.04981	3.08596	2.48281	2.9175	1.95778	2.31516	1.55446	2.95716	2.7068	0.952594	3.25901	2.93846	2.42681
CD300LF	2.9177e-08	-7.53496	8.6325e-06	-0.655367	6.36694	7.13724	6.61533	6.53721	7.02281	6.98973	6.42778	7.23328	6.37763	6.64008	7.16708	6.99619	6.58073	6.30493	6.92044	6.92021	7.34377	7.0684	6.07123	6.40381	5.29204	4.79431	6.51555	5.68194	6.06785	6.09068	6.09068	6.09068	6.54944	5.79591	5.80921	6.19741	5.75977	5.74867	5.65219	6.1913	6.76787	6.63377	6.6349	5.53292	6.40856	7.11169	5.8751	5.21982	6.9987
SRPRB	2.93179e-08	-7.53287	8.6325e-06	0.683313	3.75112	3.20576	3.30211	3.05917	2.35794	2.8318	2.54976	3.09585	3.48286	3.4462	3.46369	3.21145	3.31862	3.59561	3.02721	3.30507	3.10478	3.37548	4.09963	4.6573	3.89401	3.4906	4.00372	3.72833	3.57634	4.08353	4.08353	4.08353	3.33097	4.11665	4.02966	4.01864	4.09274	4.08762	4.06648	3.84815	3.26884	3.04244	3.64252	3.84187	3.46845	2.46302	3.87675	3.61403	3.38871
TCTN3	3.131e-08	-7.50432	8.99732e-06	0.693474	3.50329	2.65605	3.34722	2.31706	2.52923	1.96287	2.41911	2.97301	3.52491	3.28378	2.81901	2.78812	3.47382	3.1725	2.96618	2.96592	2.56278	2.97086	4.02242	4.1289	3.68399	3.7018	3.63684	3.41489	3.1263	3.48954	3.48954	3.48954	2.83539	4.02714	3.61738	3.36497	3.7886	3.61304	3.9487	3.5409	3.28075	2.84753	3.68495	4.12756	3.42476	1.85875	3.87288	4.01712	3.2052
PRKACB	3.13648e-08	-7.50356	8.99732e-06	0.733525	5.91687	5.0805	5.8773	3.85598	4.69226	5.13297	4.44327	5.59852	6.03618	5.09703	5.55924	4.68658	5.69776	4.89593	5.11091	5.79949	5.63681	4.93102	6.26358	6.02196	6.26642	5.87786	6.33508	6.10034	5.34689	6.361	6.361	6.361	5.77286	6.42796	6.03142	5.76003	6.25523	5.98102	6.31909	6.57977	5.94076	4.90515	5.20564	6.58751	6.08806	4.89002	6.3386	6.38615	5.69499
LILRA5	3.16887e-08	-7.4991	8.99732e-06	-0.971974	8.06084	8.72674	7.79938	8.64127	8.14075	9.89107	7.31161	8.51433	6.7364	8.1505	9.67569	9.57847	8.12422	8.66054	9.65457	8.41492	8.61664	8.41605	8.22606	7.15071	7.12625	7.11712	8.11183	8.11285	7.56138	7.60538	7.60538	7.60538	8.83939	7.00185	7.80449	8.27961	7.73501	7.84809	7.12013	7.6174	8.59055	7.67859	8.13559	6.65877	6.39093	8.64589	7.52363	6.87173	8.73831
ENTPD7	3.26621e-08	-7.48596	9.16461e-06	-1.46588	5.04495	4.98463	3.67663	4.58915	4.46989	7.59018	3.905	3.99174	3.61202	4.56824	8.88003	6.85309	4.07296	4.34813	5.84593	3.64809	4.7068	4.36798	4.00111	4.54576	4.07115	3.4846	3.52091	4.34191	4.78293	3.80159	3.80159	3.80159	5.32168	4.24129	4.12599	4.3247	4.01918	3.7324	3.76924	3.00644	6.9607	3.92407	5.07613	4.07386	4.12311	4.11184	3.9739	3.37152	5.25131
AC007879.3	3.34149e-08	-7.47606	9.26681e-06	-1.56964	0.288582	0.268194	-1.10085	1.50677	-1.25886	-0.562518	1.17676	-0.690726	0.670449	-0.424877	3.59821	3.49466	-0.220997	0.514196	0.679692	-0.664443	-0.222901	-0.2935	-1.52944	0.309375	-0.680284	-0.610885	-1.20825	-0.343602	-0.580312	-1.3847	-1.3847	-1.3847	-0.258045	-0.452251	-1.86713	-1.03658	-0.743205	-0.596517	-0.422033	-0.495778	-2.26246	-0.300308	-0.958773	-0.783857	1.38274	1.33394	-1.31184	-1.05071	-0.840993
DNAJC9	3.47675e-08	-7.45883	9.46646e-06	0.616087	3.05727	2.5428	2.77306	2.01867	2.08722	2.53206	2.05318	2.64748	2.77119	2.3331	2.38883	2.78812	2.75265	2.67407	2.7515	2.71893	2.49545	2.69653	2.91722	3.46449	3.09973	2.95286	3.36824	3.11409	2.88675	3.30661	3.30661	3.30661	2.44613	4.16587	3.51294	3.06827	3.27471	3.07435	3.06004	3.02785	3.04965	2.23235	2.99442	3.31827	2.54277	2.20253	3.33413	3.23304	2.75853
CAMK4	3.52224e-08	-7.45318	9.46646e-06	1.16542	5.6714	4.90175	5.10219	4.38572	4.37679	3.11952	4.22599	5.32021	4.73091	3.92539	4.99954	3.37452	5.56429	4.59645	5.11653	4.86622	4.10636	5.01243	5.6952	6.08948	6.19739	6.1587	6.29858	5.29431	4.91428	6.22071	6.22071	6.22071	4.56546	6.95268	6.26174	4.87848	5.72072	5.99032	5.99627	5.94636	5.33368	4.17197	4.56217	6.05176	6.04272	3.04374	6.32308	5.99614	5.48567
KL	3.53256e-08	-7.45191	9.46646e-06	-1.43392	2.53321	3.26817	0.98569	2.97625	3.20707	4.47278	2.13114	2.70475	3.26033	2.36595	5.56951	4.99313	0.871246	2.57127	3.54398	1.46792	2.56278	2.16206	1.99275	1.16774	1.76275	2.25047	1.14389	1.92556	2.65505	1.5222	1.5222	1.5222	2.40074	0.690555	1.55358	1.78244	1.06641	2.44024	0.825814	0.88769	2.72286	2.73171	2.78607	1.2411	1.49262	2.69813	0.343337	1.47086	2.74862
DLEU2	3.57377e-08	-7.44687	9.4705e-06	-0.580496	7.39516	8.02171	7.66519	7.47702	7.91931	7.79084	8.13151	7.84879	7.52525	7.71736	7.95084	8.27454	7.45198	7.11973	8.02486	8.0085	7.99504	8.0858	7.06879	7.22634	6.3698	6.33904	7.17456	6.77748	7.17414	7.11552	7.11552	7.11552	7.40709	7.02915	6.5943	7.03343	6.92824	6.94384	6.05712	7.21201	7.86374	7.29573	7.84271	7.34558	7.52397	8.17452	6.72095	6.93173	7.5188
SLC35F2	3.61489e-08	-7.4419	9.47419e-06	0.870869	2.37671	2.38276	1.96788	1.80466	1.11904	0.764255	1.14705	1.68732	1.83811	1.58878	1.80128	1.56479	1.76301	2.02219	1.74743	1.03876	1.04909	1.95802	3.03723	3.3718	2.58952	3.02075	1.88697	2.63891	2.55318	2.29742	2.29742	2.29742	2.40074	3.29893	2.41309	2.70318	2.70813	2.93359	2.70795	2.38218	1.42538	2.18908	2.34495	2.65588	1.8961	1.54165	2.52495	2.51903	1.97844
TMEM131	3.69555e-08	-7.43232	9.54656e-06	-0.550877	7.31758	7.93619	7.85445	7.39958	7.79408	7.79493	6.82903	8.04244	7.03019	7.24812	8.52453	7.7932	7.8027	7.69866	7.36715	8.19493	7.52194	7.87526	7.39967	6.97386	6.67261	6.85709	7.76463	6.71211	7.13843	7.1996	7.1996	7.1996	7.09965	7.59684	6.77094	6.68693	6.97648	6.64038	6.38293	7.67704	7.3459	7.01134	7.07806	7.32657	7.17091	7.29021	7.02945	6.97129	7.08739
ATP8B2	3.72256e-08	-7.42916	9.54656e-06	0.796091	6.3741	6.0722	6.41806	5.76365	4.9161	4.27621	5.15302	6.08327	5.66211	5.84099	5.70799	5.10191	6.16621	5.43482	5.73324	6.04545	5.58107	5.84205	6.91563	7.01326	6.56163	6.72533	6.29594	6.41806	6.10832	6.56612	6.56612	6.56612	5.43671	7.15353	6.83219	6.26184	6.31341	6.60701	6.58643	6.50256	5.98876	5.51693	5.88231	7.04892	6.47634	5.0459	6.87547	6.72227	5.88343
MCM7	3.9913e-08	-7.39889	1.01161e-05	0.775384	4.5879	4.30479	4.43713	3.53526	3.17793	2.49233	3.96157	3.77486	4.36866	4.09173	4.03769	4.10104	3.85357	3.98654	3.64089	4.26314	3.91992	4.15505	5.0465	5.32777	4.7959	4.6247	4.24937	4.50852	4.80772	4.54729	4.54729	4.54729	4.21398	6.12444	4.3721	4.9171	3.98322	4.4006	4.73589	4.24074	3.69101	4.279	4.50411	5.1463	4.93118	4.01647	4.63484	4.43019	4.28607
ELMO2	4.02948e-08	-7.39475	1.01161e-05	-0.863227	7.32495	9.12795	7.38783	8.81506	8.21031	7.3878	7.04732	8.66467	6.60373	7.69046	8.28437	7.78914	7.09687	7.2013	7.38183	7.55125	8.40877	8.2066	7.59411	6.88833	6.64332	6.80149	7.04676	7.39157	7.12912	6.89456	6.89456	6.89456	7.05945	7.16729	6.42892	6.33995	6.23244	6.66576	6.06068	6.99553	7.60768	7.1934	7.53223	7.15239	6.56894	9.11622	6.75026	6.70982	7.57737
TBC1D8	4.17844e-08	-7.37899	1.03808e-05	-1.15505	5.99294	6.97519	5.25004	6.94626	7.13272	8.00586	4.88025	6.89711	4.48684	6.84257	7.71626	7.40402	5.47784	6.2737	7.38649	6.62817	6.19767	6.69871	6.37649	4.7163	5.79277	5.23396	5.73112	5.46101	5.87492	5.23879	5.23879	5.23879	5.39295	4.63068	5.91868	5.05681	4.47581	5.63566	4.0487	4.84572	6.49882	5.88207	6.48912	4.60555	4.78333	6.90871	4.74482	4.69048	6.85885
C19orf48	4.23665e-08	-7.37298	1.04169e-05	0.721124	2.90512	2.36383	2.6821	2.88828	2.10281	1.60129	1.86523	2.18676	2.47489	2.28238	1.59148	2.25084	2.58114	2.57127	2.33511	2.53789	1.77245	2.39036	2.78632	3.36541	3.55307	3.20712	2.69691	2.96592	2.87741	2.95915	2.95915	2.95915	2.23822	4.09309	3.27149	3.40899	3.06709	3.33014	3.74294	3.02785	2.27609	2.41242	2.59905	3.21869	2.66046	2.24275	3.04867	2.93101	2.63484
IL10	4.32278e-08	-7.36424	1.05202e-05	-1.10762	1.33279	1.4688	1.54597	2.85153	2.2778	2.55153	0.691974	1.50586	0.857579	2.15659	3.1167	1.59818	1.48569	3.00229	2.58287	1.8766	1.18351	1.15869	1.09315	0.461054	0.537314	1.5557	0.478525	0.50784	0.896531	1.38527	1.38527	1.38527	0.424986	0.457421	1.6186	0.316818	1.10038	0.967145	0.792012	1.25743	1.89716	2.12166	1.55446	1.25725	-1.97168	0.687101	0.894575	0.206249	2.42681
SLC38A1	4.59259e-08	-7.33794	1.1064e-05	0.641557	7.45588	6.7586	7.40837	6.48718	6.15254	6.02638	6.61103	7.21923	7.17255	7.01817	7.08568	7.69581	7.1389	6.65837	6.7553	7.01203	6.59045	7.12684	7.92032	7.93631	7.58983	7.05017	7.81165	7.3548	7.07603	7.63453	7.63453	7.63453	6.88776	8.20266	7.68909	6.96366	7.85862	7.58123	7.62917	7.80304	7.2431	6.56457	6.86336	7.80537	7.56825	6.73455	7.93973	7.89817	7.01585
MCM3	4.67593e-08	-7.33013	1.11521e-05	0.725326	4.83135	4.24397	4.79821	3.79922	3.79191	3.45542	3.905	4.3999	4.32965	4.25409	4.23128	4.16929	4.48464	4.41751	4.17088	4.54489	4.06631	4.49426	5.44597	5.50697	4.74457	5.0734	4.8703	4.91186	4.82482	4.99333	4.99333	4.99333	4.105	6.53111	4.7681	4.60097	4.3079	4.58584	4.73811	4.90476	4.31239	4.38344	4.62071	5.48572	4.70787	4.01066	5.16765	5.12347	4.32327
NOP58	4.74731e-08	-7.32355	1.11649e-05	0.703087	4.12054	3.20576	3.988	3.12223	2.91203	3.06638	2.6485	3.47905	3.74841	3.65333	3.68392	3.69317	4.07758	3.79779	3.89777	3.64063	3.03536	3.41593	3.87792	4.47028	4.75613	4.16258	4.37823	4.2367	3.64398	4.44764	4.44764	4.44764	3.54774	4.96507	4.17003	3.81694	4.14657	4.0196	4.03431	4.62824	3.9139	2.94177	3.58767	4.51777	4.03867	2.46302	4.51081	4.59946	3.66124
SIGLEC12	4.81555e-08	-7.31735	1.11649e-05	-1.8252	-0.051893	-4.36345	1.80499	-0.029688	-0.345257	1.52457	0.148674	-0.304251	-0.737812	-4.36345	1.2673	-0.431714	1.56676	3.79779	0.413241	-0.820548	-0.0122418	-0.786333	0.164491	-1.26911	-1.7353	0.936481	-0.291587	-0.667472	-1.06499	-1.25112	-1.25112	-1.25112	-1.59998	-2.56498	-1.45667	-0.383114	-2.01068	-0.596517	-0.0106416	-0.270055	-2.96017	1.53324	-1.8286	1.08697	0.617747	-0.657149	-2.02695	-1.17377	-0.619431
CD163	4.82176e-08	-7.31679	1.11649e-05	-1.68305	6.01721	4.18048	5.84097	6.95819	7.66418	6.60575	7.76321	5.53085	6.12316	6.45686	8.06306	9.06832	4.72436	8.51826	6.16388	6.07206	4.91116	9.2827	4.5224	4.30633	4.05563	6.6212	5.63401	4.54815	4.28648	5.35598	5.35598	5.35598	4.4327	4.27158	4.39083	4.11481	3.75701	2.92067	3.59887	4.50393	4.99348	4.38344	4.8501	5.43781	5.04378	5.99567	4.56459	3.5129	4.9412
HP	4.93854e-08	-7.3064	1.13254e-05	-1.78696	4.64494	5.04826	3.44036	4.47902	3.79191	6.46401	2.34253	4.31967	1.39977	5.51278	8.36826	7.72681	2.72936	4.41327	5.05339	4.53285	5.62702	3.4475	1.41656	3.32642	5.2075	2.62231	2.60879	3.45713	4.3787	3.58643	3.58643	3.58643	4.54474	4.21969	4.3144	3.68442	2.98764	4.80723	2.12382	1.25743	4.07991	3.54958	5.63019	2.97191	2.03334	3.81113	3.35092	1.80004	5.63707
FAM110B	5.02714e-08	-7.29868	1.14188e-05	-1.04327	2.05102	2.91203	1.09551	3.5696	2.83012	3.81886	1.84686	2.46059	1.45881	2.07947	3.66871	3.51229	1.85196	2.88472	2.66197	2.56968	2.252	2.37402	0.876222	0.55398	2.07747	2.95286	0.574703	1.77783	2.18059	1.40565	1.40565	1.40565	1.0127	0.690555	1.95706	2.3993	1.31809	1.72974	0.953616	0.790858	1.92779	2.46777	2.48361	1.28902	-0.414549	2.28187	0.471721	1.40788	2.87245
IGKV3-15	5.29061e-08	-7.27649	1.19039e-05	2.21667	4.95297	3.61089	3.74564	3.94588	-0.624414	2.74992	2.38133	1.01094	3.25201	3.6797	4.25183	2.119	2.60692	2.12947	3.01521	1.50127	2.21061	5.9116	5.51713	6.44686	5.60191	4.73995	1.37517	5.25094	5.13209	3.61733	3.61733	3.61733	3.75432	3.28712	4.05729	5.47952	4.70559	5.80773	8.20602	3.85416	3.03565	2.87509	6.59234	3.49892	3.64066	3.70717	4.21922	3.66429	5.09775
SLC25A42	5.41834e-08	-7.26613	1.20773e-05	0.686745	3.97516	3.03678	4.1872	3.22637	2.98954	2.51233	3.22618	3.61224	3.76605	3.80478	2.8463	3.21145	3.65159	3.37792	2.95366	3.63312	3.43634	3.15421	3.95198	4.3748	4.06497	3.92194	4.21247	4.30383	3.8053	4.01556	4.01556	4.01556	3.88092	4.33894	4.0096	3.99717	4.38571	4.21737	4.52316	4.34674	3.75218	3.60823	3.03599	4.46138	4.44355	2.93748	4.5477	4.39544	3.25507
GADD45A	5.70439e-08	-7.24379	1.25819e-05	-1.3885	3.67108	3.63477	2.58502	5.45924	4.27038	5.95873	2.91849	3.42894	2.00585	4.01614	6.71937	5.55521	2.8955	3.29738	4.58223	2.80159	4.03108	3.54556	2.46693	2.42235	3.05673	2.35937	3.11192	3.12287	4.30748	2.16025	2.16025	2.16025	4.40997	1.80749	2.84309	3.4726	2.77275	3.04489	2.26603	2.18671	4.5864	3.34799	3.58207	2.29822	2.07633	4.59223	2.05027	2.76503	4.27575
CD96	5.75021e-08	-7.24032	1.25819e-05	0.902145	5.79348	4.8277	5.62752	3.58087	4.54027	4.38328	4.56061	5.40041	5.65739	5.48501	4.52527	4.17483	5.69024	4.52359	5.0327	5.41362	5.26204	4.95867	6.66264	5.87773	5.80767	5.60818	6.12182	5.7988	5.24711	6.0954	6.0954	6.0954	5.11706	6.82111	6.18779	5.52898	6.50549	5.87622	6.34773	6.31833	5.84773	4.58464	4.51297	6.29314	6.19759	4.06214	6.29804	6.46239	5.57672
CD177P1	5.93018e-08	-7.22693	1.27065e-05	-2.7365	1.3905	-1.36402	-2.70843	-0.173763	-0.432442	3.05279	-1.84161	2.88901	-1.89428	2.77351	3.7432	6.39021	1.03216	0.0730509	0.679692	-2.49011	-2.44779	-2.14778	-2.13746	-1.26911	-1.17068	-0.097601	-2.78952	-0.162117	-1.38626	-2.64346	-2.64346	-2.64346	-0.466535	-2.95619	-0.143019	-0.627982	-0.420644	-0.83851	-1.57387	-3.20243	2.74022	0.777699	0.622464	-3.73326	-2.53612	-1.18788	1.77964	-1.62212	2.04474
TRABD2A	6.06095e-08	-7.21746	1.27065e-05	1.26561	5.4091	4.89187	4.75702	4.2298	3.8531	2.47204	4.04852	5.03491	3.89989	3.55704	3.56574	3.46781	5.13874	3.98654	4.99042	4.84364	3.91992	5.02556	5.3247	5.80042	6.12564	5.59988	6.1406	4.68775	4.63564	5.57869	5.57869	5.57869	4.43645	6.36753	6.07551	5.26125	4.94172	5.348	6.26929	5.5081	4.88841	4.25822	4.45592	5.44488	5.29801	2.94968	6.01338	6.06239	4.93902
AC011379.1	6.06629e-08	-7.21708	1.27065e-05	-1.10108	4.31424	5.62657	3.81685	4.36631	4.73039	6.65044	5.13988	4.10776	3.78923	5.07981	5.98776	4.83053	4.81841	4.59271	5.4375	4.58823	4.8383	4.02509	4.0538	3.333	3.14736	1.27906	3.86795	4.31536	4.81262	3.22298	3.22298	3.22298	4.93535	3.23887	3.38174	3.81694	3.11772	3.5969	2.22861	3.59926	5.53359	4.32968	4.60423	2.06121	3.32133	5.22723	3.10914	3.03887	5.0997
MAGED1	6.07414e-08	-7.21652	1.27065e-05	0.766569	3.88527	3.18434	3.68836	3.59205	2.54072	2.53206	2.98718	3.20905	3.57247	3.39937	3.20369	3.40315	3.43835	3.31567	2.66197	3.51561	2.98716	3.47073	4.67821	5.04121	3.90791	3.49657	3.63126	4.15351	3.77545	3.67722	3.67722	3.67722	3.64827	4.1594	3.67965	3.90411	3.61736	3.94503	4.22053	3.34166	3.49019	2.91547	4.00265	4.39905	3.83677	3.18461	4.11821	4.17045	3.80208
KIAA0319L	6.08738e-08	-7.21557	1.27065e-05	-0.763831	7.78816	7.56257	9.06133	7.66347	9.11383	8.11782	7.7932	8.55797	7.33253	8.20683	8.1963	8.71337	8.01169	7.78282	7.56173	9.1068	8.98497	8.77641	7.48129	7.32934	7.15019	6.53386	8.58449	6.74018	7.53267	7.79832	7.79832	7.79832	7.07398	7.50578	7.31131	6.73365	6.98047	7.60967	6.50857	7.9232	7.34164	7.8833	7.8908	7.34487	7.2501	8.74329	7.31303	7.1236	7.98767
NOS1AP	6.12682e-08	-7.21276	1.27065e-05	-1.1208	1.80972	-0.101032	2.26287	2.88828	1.86758	2.15327	1.46865	2.75984	0.566917	2.19367	3.30553	4.11841	1.30845	2.55596	3.01521	2.87977	3.17101	0.662897	0.922296	1.01266	1.8942	1.82618	2.09589	0.963568	1.36583	1.18766	1.18766	1.18766	1.33572	2.0505	1.75981	1.73135	0.480997	0.992051	1.4418	1.32815	1.95778	2.44955	1.98632	-0.382527	0.617747	2.05222	-0.129002	0.867612	1.37683
MOB3C	6.3021e-08	-7.20051	1.29573e-05	-0.669811	6.32821	7.20993	6.74668	7.06638	6.86265	7.17212	6.02812	7.35232	5.37656	6.59489	6.73497	6.72384	6.55529	6.82324	6.95147	7.07708	6.99646	6.99152	6.25348	5.64407	6.0064	5.46322	6.27819	6.21352	6.10433	6.24282	6.24282	6.24282	6.22531	6.14095	6.19669	5.82848	6.06083	5.93841	5.88744	6.50256	6.23975	6.24098	5.99516	5.91974	5.15157	7.2277	5.97868	5.60271	6.29448
TRAV13-2	6.47546e-08	-7.18873	1.31538e-05	1.3547	0.190199	-0.457167	-0.178042	-4.36345	-1.10769	-1.17978	-1.42981	-1.2202	-1.39889	-0.215989	-1.37515	-2.4178	0.028358	-0.861814	-1.13997	-1.1949	-1.37574	-0.518974	-0.180322	0.255053	0.737311	0.280216	0.527416	-0.551248	-0.580312	0.509223	0.509223	0.509223	-1.59998	1.29676	0.340826	-0.049486	-0.157187	0.0507696	0.721937	0.840086	0.223333	-0.300308	-1.60766	0.00948541	-0.263951	-0.988481	0.343337	1.31938	0.0308339
ALDH18A1	6.50795e-08	-7.18656	1.31538e-05	0.700285	3.81865	3.26817	3.55374	3.0752	2.88524	2.6451	2.54976	3.27672	3.51799	3.58521	3.31533	3.14521	3.0725	3.49488	3.01521	3.61037	3.21354	3.18262	4.99892	4.67552	3.8443	3.96134	3.64794	3.88612	3.88666	3.78614	3.78614	3.78614	3.18689	4.6902	4.00555	3.88086	3.63485	4.16631	3.72961	3.70933	3.46952	3.18138	3.84787	4.42431	3.65963	2.66891	4.23438	4.11894	3.57412
LMAN1	6.7029e-08	-7.17374	1.3434e-05	0.882427	5.46293	4.94378	5.19559	4.94796	3.90292	4.48296	3.80864	4.58289	4.9318	5.08228	5.02065	4.50921	4.73901	4.80501	4.59034	4.824	4.45984	4.76243	5.97341	6.83841	5.45823	5.33242	4.98632	5.69524	5.20854	5.59873	5.59873	5.59873	5.13102	5.83903	5.25074	5.53147	5.42482	5.88206	5.60551	5.11186	4.69721	4.11532	5.81346	5.7946	5.08296	4.6457	5.70702	5.16056	5.14763
SEPTIN1	7.01072e-08	-7.15424	1.38612e-05	0.705531	5.00745	4.64377	5.22408	4.00564	3.41492	3.3482	3.97008	4.70722	4.68837	4.64386	4.06117	4.52666	4.75063	3.8861	4.22918	4.93497	4.30131	4.50929	5.71005	4.98391	5.2159	5.1904	4.96651	5.31168	5.17273	4.89588	4.89588	4.89588	4.57571	5.91681	5.23008	4.99678	5.05864	4.98368	5.59698	5.29514	4.72799	4.31968	4.04805	5.59302	5.49704	3.59513	5.39382	5.55385	4.44182
ANKS1A	7.03229e-08	-7.1529	1.38612e-05	-0.658173	5.86625	6.83961	6.11319	6.15907	6.37345	5.86266	6.21783	5.89923	5.73557	6.1688	7.04503	7.77095	5.86737	5.43691	5.88602	6.03267	6.37556	6.71014	5.77897	5.57369	5.25175	5.27624	5.91575	5.5286	5.82843	5.64767	5.64767	5.64767	5.69196	5.45805	5.07269	5.42696	4.83228	5.05041	4.89561	5.42383	5.95384	5.75248	5.97606	5.58664	5.77011	6.87791	5.30037	5.40188	5.86405
MTCO1P11	7.0944e-08	-7.14908	1.3869e-05	-0.710121	5.39615	6.95873	5.42853	5.3416	5.88708	6.5354	5.36951	6.12058	4.73688	5.6391	5.99234	5.91461	5.44426	5.8856	6.09286	6.10091	5.97478	6.29343	4.82186	5.1021	4.38606	4.25356	5.14551	4.48829	5.11432	5.19994	5.19994	5.19994	5.66981	5.47116	5.18964	4.90754	5.28043	5.22208	4.34813	5.37873	5.47776	5.17834	5.68217	4.64751	4.4298	6.51813	4.67984	4.65927	5.74446
RPL22	7.27232e-08	-7.13833	1.40234e-05	0.621561	3.75498	3.36654	3.54085	2.715	3.12548	2.27536	3.18291	2.99613	3.98268	3.04095	3.22464	2.97768	3.28707	3.46242	3.07424	3.39656	3.39998	3.58867	4.2059	3.9352	4.1551	4.19966	3.9994	3.78471	3.15749	3.86918	3.86918	3.86918	3.73006	4.31004	3.96028	3.84526	3.48218	3.69116	4.08753	3.78041	3.15695	3.48844	3.34467	4.08747	4.46528	2.42857	4.02711	3.68215	3.56285
DNAJC13	7.291e-08	-7.13721	1.40234e-05	-0.669266	7.42843	7.83287	7.90717	7.45422	7.86349	8.06673	6.51324	8.16548	6.91632	7.52123	9.06855	8.70382	7.3564	7.55644	7.76621	8.2664	7.9623	7.98319	7.48225	7.11208	6.71521	6.88639	7.59833	6.83133	6.77034	7.13281	7.13281	7.13281	7.05701	7.51436	6.73474	6.27379	6.73972	7.04734	6.11295	7.15175	7.60768	7.41142	7.88	7.26426	6.79543	8.02435	7.13461	6.99603	7.71131
FUT8	8.24896e-08	-7.0836	1.56685e-05	0.623148	4.40665	3.51977	4.05297	4.04686	3.52893	3.35928	3.22618	3.62713	4.28549	3.73104	3.9012	3.5297	4.114	4.23257	4.0169	4.25339	4.19921	3.92773	4.44955	5.02912	4.36606	4.26411	4.44973	4.22044	4.10638	4.19893	4.19893	4.19893	3.88092	5.08593	4.76091	4.7645	4.5078	4.88907	4.63701	4.51534	3.11764	3.89744	4.22382	4.60239	4.51561	3.75662	4.50832	4.36537	4.07621
RFC3	8.27769e-08	-7.08209	1.56685e-05	0.729811	2.40729	1.53798	1.84747	1.13093	1.56402	1.77693	1.67012	1.33499	2.61125	1.53201	1.68515	1.63082	1.83023	2.20989	2.17173	1.85096	1.55819	2.1235	1.80876	3.25902	2.61515	2.66536	2.09589	2.3106	1.96833	2.66166	2.66166	2.66166	1.62603	3.80901	2.28542	2.6583	2.38888	2.47599	2.46147	2.12846	2.34579	1.60082	2.44709	2.6063	2.26159	1.54165	2.49504	2.29371	1.92663
FAM136A	8.48377e-08	-7.07141	1.59321e-05	0.59614	2.93559	2.20272	2.90963	2.67349	1.98998	2.01988	2.21944	1.92279	2.19135	2.65889	2.14688	2.50087	2.91627	2.94471	2.53325	2.47211	2.05562	2.73541	3.2599	3.51159	3.28681	2.83524	2.68618	2.86493	2.68746	3.33345	3.33345	3.33345	2.44613	3.70629	2.82484	3.35376	3.19049	2.59457	3.15617	3.16939	2.59512	2.44955	2.75654	3.18953	3.26049	2.35708	3.16085	2.71387	2.36327
TPK1	8.68374e-08	-7.06129	1.60889e-05	-0.759039	4.63532	4.6359	4.07994	5.58769	5.25118	6.0793	6.03219	4.20028	4.89219	4.96389	5.55304	6.15799	4.86189	3.96932	5.04751	4.53285	4.82465	4.63799	3.80602	3.72647	3.47122	3.80648	4.52087	3.89639	4.12228	4.14238	4.14238	4.14238	4.46614	4.57589	4.19156	4.31606	4.5545	4.05844	4.11513	4.58918	5.21763	4.82616	4.53052	3.65945	4.43256	5.41932	4.2374	4.05186	4.23373
AC022400.1	8.76138e-08	-7.05743	1.60889e-05	-1.62616	-0.998911	0.56192	-3.31059	0.706082	-0.84591	1.06442	-1.84161	-1.72575	-2.65476	-0.808887	1.34589	0.940459	-2.67576	-0.110107	0.413241	-1.1949	-0.0122418	-1.31209	-1.80165	-3.40548	-1.05836	-1.6066	-2.78952	-3.30184	-2.06236	-2.09325	-2.09325	-2.09325	-1.17657	-2.95619	-1.45667	-1.79595	-2.75274	-3.59729	-3.47991	-4.36345	-2.96017	-1.10459	-2.40847	-1.79543	-2.93092	-1.18788	-2.02695	-1.809	-0.427408
ARHGAP24	8.76965e-08	-7.05702	1.60889e-05	-0.90868	4.96606	4.83802	4.56673	5.93809	5.82264	6.10588	5.49275	4.85369	5.1035	5.37029	6.01957	7.65077	4.02595	4.11218	5.61894	4.64902	4.99886	5.19786	4.67485	4.4553	4.37109	4.02471	4.6807	4.14922	4.90051	4.40273	4.40273	4.40273	5.1194	4.08629	4.13342	4.33043	4.32236	4.47757	4.07704	3.84213	5.36479	4.95119	5.55926	4.2087	4.29979	5.0201	4.20081	3.91135	5.06018
GCNT4	9.04233e-08	-7.04372	1.64626e-05	1.07109	3.54911	2.09206	3.3398	1.84261	2.52923	1.2664	1.80942	2.82587	2.7595	2.3331	2.93795	1.38512	3.48777	3.14208	2.44654	3.00133	2.85909	2.30677	4.01712	3.65484	3.70403	3.52022	4.55958	3.11409	2.95047	4.25334	4.25334	4.25334	2.57431	4.28352	4.32417	2.60252	3.69166	3.79388	4.23947	4.31662	3.42728	2.98035	2.29104	3.9073	3.68763	1.09121	4.16644	3.89613	3.27592
AC103996.2	9.43971e-08	-7.02504	1.69148e-05	-1.49428	1.91346	1.01443	2.14861	3.69935	4.01014	2.66311	3.45561	1.56892	3.30123	2.22981	4.14049	4.38077	0.913187	1.83201	1.65765	0.844493	1.45564	3.53825	0.164491	1.48341	-0.0774376	0.386966	0.977928	-0.250008	2.64408	0.617999	0.617999	0.617999	1.62603	-1.15218	0.780357	1.52681	0.373977	0.66038	0.488634	-1.09246	2.49641	3.06654	2.63195	-0.486267	1.38274	2.37529	0.832157	0.928712	2.13882
NRN1	9.48451e-08	-7.02299	1.69148e-05	-1.63877	1.9384	4.70897	-0.809305	1.9508	0.694281	3.4346	0.88434	3.07428	-1.03081	2.89103	1.38364	2.63564	1.30845	2.72969	4.79371	3.98521	3.14927	2.25419	1.2459	1.19685	1.31863	1.64445	-2.37587	0.0733741	2.07018	0.471062	0.471062	0.471062	1.1286	1.72231	2.10053	1.52681	0.373977	2.23647	0.4458	0.687055	0.121029	2.39348	1.48412	0.544972	-0.263951	-0.988481	0.0461955	0.0500223	2.61315
MRPS2	9.50653e-08	-7.02198	1.69148e-05	0.580191	3.37465	3.01268	3.22366	2.81382	2.60781	2.10138	2.14624	2.55706	3.30123	2.92449	2.53018	2.44689	3.04447	3.63983	2.96618	3.17675	2.87242	3.18262	3.76868	4.10606	3.95551	3.73249	3.70218	3.57051	3.40499	3.60417	3.60417	3.60417	3.09488	4.04829	3.72464	3.44644	3.3683	3.36869	4.00141	3.27162	2.88772	3.3081	2.862	3.68952	3.33909	2.52956	3.38393	3.32682	3.01984
MTX3	9.57442e-08	-7.01889	1.69148e-05	0.672433	3.80888	2.91203	3.91498	2.65228	2.8671	2.43059	2.53836	3.54326	3.54548	3.45386	2.96311	3.06388	3.90124	3.23149	3.25859	3.57947	3.02346	3.22877	3.56592	4.08286	4.09564	4.1051	4.2384	3.79573	3.15749	4.02217	4.02217	4.02217	3.34701	4.71025	3.90488	3.40356	4.21405	3.80095	4.07001	4.1799	3.85934	2.92868	3.21314	4.2637	3.86973	2.57752	4.50582	4.21712	3.48738
MFSD13A	9.66519e-08	-7.01479	1.69496e-05	-0.603185	4.12378	4.99697	4.23198	4.53223	4.63444	5.22979	4.24364	4.80868	3.59238	3.96881	4.49541	4.7511	4.48116	4.97573	4.16546	4.68212	4.58658	4.96686	4.41371	3.5628	3.82613	4.34909	3.87741	3.65763	4.304	4.15748	4.15748	4.15748	3.91898	3.7882	3.75388	3.93455	3.55748	3.38289	3.1628	3.8116	3.56028	4.49423	4.27679	4.32437	3.03205	4.42315	3.69578	3.48775	4.63175
H1-3	9.9088e-08	-7.00398	1.725e-05	0.84815	5.43035	4.66325	4.86434	4.70697	4.12146	3.47594	4.30883	4.75545	5.20398	4.90083	4.92789	3.69317	4.68858	4.99572	4.95631	5.09648	5.01998	4.23411	5.65994	6.13061	5.72963	5.33742	5.3832	5.45234	5.23071	5.72976	5.72976	5.72976	4.95118	6.9606	5.32567	6.20913	5.65224	5.51841	6.34555	5.20875	4.97527	4.48978	5.1965	5.78975	5.31007	4.66803	5.32608	5.09876	4.80196
AC013644.1	1.01471e-07	-6.99366	1.74397e-05	-0.833597	0.888314	1.1084	1.29286	0.221373	2.02313	1.67413	1.20588	1.40579	1.64826	1.24467	1.8289	1.66274	0.641032	2.06607	1.49434	1.28847	1.41977	1.84404	0.922296	0.309375	0.30506	0.666694	0.790357	-0.443692	0.00402448	0.582644	0.582644	0.582644	0.648557	0.827372	-0.143019	0.786078	0.373977	0.530399	-0.590139	0.0135706	0.648019	1.04365	0.485147	0.463788	0.0554431	0.500661	-0.0682082	-0.064397	0.996116
TAFA2	1.02038e-07	-6.99124	1.74397e-05	-0.895908	5.02668	5.56782	5.71615	3.90163	6.69216	4.85996	6.35085	6.27274	4.80388	5.11406	4.48677	5.40526	5.68268	6.43401	5.59293	6.27735	4.6843	6.3561	4.20124	5.23258	4.84908	4.29185	4.70481	3.47094	4.08626	4.69325	4.69325	4.69325	5.17662	4.83722	3.91786	4.71714	4.51726	4.97278	3.70712	4.45736	4.10022	4.91514	4.97931	4.23952	3.88996	6.72748	4.64168	4.2946	4.72317
BTBD19	1.02372e-07	-6.98982	1.74397e-05	-0.975843	3.57333	4.55476	3.14069	5.32829	3.87142	4.65928	5.10939	3.41184	3.70639	4.64051	4.38342	4.35658	3.30293	3.99791	4.72905	3.04722	3.77838	3.98263	3.56592	3.35253	2.9331	3.07764	2.09589	3.48462	3.6927	2.17219	2.17219	2.17219	3.6866	2.42941	3.18827	3.53848	2.54504	2.58641	2.67124	2.12846	3.55048	3.40582	3.76129	2.78959	3.29123	4.70448	2.60179	2.4054	3.89936
IPO5	1.04452e-07	-6.98108	1.74824e-05	0.588171	5.22034	4.69389	5.16652	4.40486	4.38955	4.16054	4.30883	4.49632	5.49059	4.7441	4.73694	4.37596	4.85653	4.95546	4.83866	4.7737	4.71052	4.94491	5.46944	5.79329	5.31047	5.42771	5.42895	5.26884	4.92791	5.49796	5.49796	5.49796	4.75774	6.30079	5.28452	5.05508	5.10539	5.21945	5.26097	5.09421	4.81248	4.46278	5.10376	5.62759	5.54246	4.14935	5.52909	5.12347	4.83513
CDK4	1.04751e-07	-6.97984	1.74824e-05	0.596455	3.75061	3.1626	3.77894	2.85153	2.78251	2.57074	2.67996	3.23844	3.57913	3.50637	2.95058	3.15646	3.45974	3.73122	3.56059	3.28606	3.04717	3.28227	3.62979	4.16617	4.14633	4.12837	3.81478	4.07881	3.52943	3.82069	3.82069	3.82069	3.26495	4.67215	4.13342	4.06064	3.9228	3.82541	4.37977	3.57038	3.04965	3.24613	3.57644	4.1687	3.77722	2.83597	3.9847	3.58585	3.45116
C12orf66	1.04821e-07	-6.97955	1.74824e-05	0.697528	3.31378	2.78971	3.04355	2.47035	2.60781	1.70922	2.30266	2.42695	3.03639	2.72369	2.47878	2.51842	3.55554	3.111	2.63085	2.84121	2.52951	3.04495	2.81102	3.82764	3.47589	3.79198	3.74931	3.21602	2.58794	3.70214	3.70214	3.70214	2.66669	3.97654	3.81527	2.5641	3.83474	3.79388	3.79507	4.02886	2.84021	2.50353	2.80543	3.84721	3.2973	2.20253	3.53363	3.66878	2.76837
SLC25A28	1.05711e-07	-6.97588	1.75084e-05	-0.599425	5.03846	6.08525	5.54764	5.06494	4.71272	5.88967	4.02011	5.72849	4.58947	4.71571	6.16892	5.83281	4.6519	5.72041	5.39645	5.78263	5.96236	5.83759	5.0016	4.63886	5.08444	4.93949	4.88444	4.53177	4.79289	4.98151	4.98151	4.98151	4.75172	5.18317	4.69712	4.42189	4.62912	4.56524	4.44375	5.29734	5.58494	4.13255	4.78088	5.27284	4.64262	5.57904	4.66425	4.68607	4.86983
CD40LG	1.07053e-07	-6.9704	1.76083e-05	0.988035	3.06236	2.24472	2.93939	1.59834	2.23601	0.548724	1.41979	2.73256	2.35569	2.05952	2.25267	1.22331	2.93675	1.52131	2.67729	2.4032	2.36948	2.04313	3.71733	3.48233	3.1356	3.45423	3.57423	2.96592	2.22543	3.14635	3.14635	3.14635	2.18567	4.07946	3.76828	2.60252	3.86469	3.41086	3.95253	3.48009	2.61408	2.07489	1.80584	3.38961	3.3911	1.04647	3.68699	3.28654	2.97803
AC124319.3	1.10001e-07	-6.95861	1.78535e-05	-0.852231	4.58278	5.66381	5.95221	4.55527	5.04273	5.28606	4.39983	5.9681	2.96691	5.03965	3.94604	4.72488	5.13653	4.80177	4.83866	5.94296	6.02339	5.40899	4.41773	3.99028	3.5263	3.27819	4.39479	3.8012	4.5442	4.20185	4.20185	4.20185	3.39409	4.5037	3.98926	3.74149	4.23332	4.54224	3.38879	4.63523	4.21641	4.59711	4.62617	4.91263	3.6737	5.1994	4.22834	4.16093	4.38536
SERPINB1	1.10041e-07	-6.95845	1.78535e-05	-0.981331	8.00952	9.06855	7.59524	9.09132	8.33496	9.72234	7.57833	8.30311	7.15369	8.12883	9.9462	9.68746	7.76204	7.56649	8.82072	8.05908	8.88862	8.37867	7.56536	7.30573	7.26158	6.65297	7.39805	7.75016	8.08898	7.49412	7.49412	7.49412	8.05461	7.36148	7.57564	7.91697	7.01928	7.40003	6.39564	7.10657	8.765	7.97332	8.43516	7.01161	6.9167	8.9213	7.12325	6.67123	8.52261
VSIG4	1.10851e-07	-6.95526	1.78635e-05	-1.88182	1.87222	-0.457167	0.691362	3.93714	2.39639	2.40941	3.98275	2.32104	5.48172	2.39807	2.97552	-0.431714	-0.220997	3.94603	3.23809	1.32619	0.334534	3.87066	0.239198	0.139856	-0.133253	3.90408	-0.919084	1.24652	-1.2167	0.35012	0.35012	0.35012	1.20099	-1.43568	-1.13749	0.570443	-0.420644	-1.6397	1.41984	-3.20243	1.54874	0.890028	0.665478	0.49136	1.05036	1.29622	-0.737934	-0.188679	0.524677
TNFAIP8L3	1.12467e-07	-6.94898	1.79775e-05	-1.75785	0.483376	-0.457167	-0.947725	0.621302	1.08804	2.73297	0.0234387	1.01094	-1.20314	1.09595	3.05955	3.5035	-1.23007	2.47691	1.59453	1.20994	-0.222901	-2.14778	-0.506746	-3.40548	0.463973	1.48535	-2.78952	0.211406	1.2834	-0.911628	-0.911628	-0.911628	-0.466535	-2.56498	0.991463	0.490755	0.373977	0.564009	-1.57387	-1.29015	0.648019	1.18248	0.385758	-0.23969	-1.25135	-0.988481	-1.05432	-1.62212	1.83592
CFAP97	1.13066e-07	-6.94667	1.79775e-05	0.578152	4.13568	3.45863	3.95438	3.19737	3.2979	3.33702	3.02851	3.58961	4.06098	3.49156	3.75044	3.7388	4.07296	3.78472	3.81712	3.79656	3.64492	3.40793	4.31354	4.26225	4.32523	4.33582	4.37823	4.39358	3.65495	4.2949	4.2949	4.2949	3.69915	5.03562	4.51557	3.81285	4.37535	4.33884	4.10828	4.38041	3.9139	3.4523	3.62083	4.61811	4.35029	3.05508	4.69527	4.2414	4.05224
ATP5MC1	1.16754e-07	-6.93273	1.84409e-05	0.65064	3.21759	2.64041	2.98767	3.12223	2.10281	2.22776	2.11588	2.26501	3.28501	2.92449	2.21128	2.09581	2.55488	3.12144	2.91543	2.64624	2.71853	3.39988	3.55865	3.97776	3.63053	3.10917	2.97762	3.42201	3.37213	3.28478	3.28478	3.28478	2.81246	3.81314	3.31791	3.7198	3.1586	3.37344	4.11513	3.08001	2.5167	2.73171	3.27694	3.26735	3.01742	2.26244	3.2767	2.916	2.79751
TRAC	1.22746e-07	-6.91099	1.92598e-05	1.024	6.73033	5.66187	6.83047	5.1544	5.02033	4.39949	4.89374	6.38103	6.16586	6.10455	5.65881	5.16177	6.51074	5.46585	5.6619	6.42154	6.06608	5.90309	7.72944	6.72869	6.68829	6.63886	7.22499	6.7968	6.11728	6.98662	6.98662	6.98662	5.74286	8.05001	7.57393	6.28638	7.14412	6.9711	7.48258	7.4737	6.44293	5.30025	5.34776	7.40614	7.10495	4.36512	7.38308	7.27979	6.17097
CD200R1	1.33356e-07	-6.87499	2.06906e-05	0.938703	2.62077	1.69769	1.64562	1.13093	1.29219	1.60129	0.421133	2.57253	1.57009	0.973401	2.40728	1.08881	2.26214	2.26739	1.9118	2.56968	1.90808	1.37111	2.17506	2.79974	2.33568	2.52046	2.83925	2.26377	1.76057	3.42113	3.42113	3.42113	1.93282	3.75428	2.81562	2.6583	3.16664	2.56167	2.41781	2.88268	2.34579	1.75711	2.11602	2.67404	3.34496	0.123742	2.70989	2.39461	2.22713
EIF2AK3	1.336e-07	-6.87419	2.06906e-05	0.733487	4.34058	3.90081	4.26761	3.84667	2.947	3.29144	3.02851	3.38581	4.02725	4.1209	3.97724	3.88803	3.82639	4.0589	3.47556	3.50742	3.28506	4.18345	4.65452	5.40776	4.91764	4.18124	4.16691	4.46087	3.85371	4.43778	4.43778	4.43778	4.01247	4.32456	4.19867	4.13132	4.5204	4.54855	4.27355	4.6866	3.63643	3.47048	4.48322	4.4787	4.3208	3.37758	4.69308	4.4381	4.0482
RRP1B	1.36796e-07	-6.86393	2.10352e-05	0.644361	4.50589	4.04444	4.67389	3.6467	3.67164	3.23237	3.46165	4.10244	4.10784	4.00576	4.26706	3.12244	4.40971	4.12261	3.96169	4.2287	3.52343	4.44036	5.04129	5.1021	4.65884	4.89497	5.02087	4.56756	4.32819	4.56098	4.56098	4.56098	3.94556	5.66279	4.43663	4.26308	3.90849	4.23834	4.47338	4.57107	3.93667	3.70355	3.9644	5.15925	4.65449	3.23532	4.86075	4.92785	4.17943
MYBL2	1.38192e-07	-6.85952	2.10352e-05	1.20266	4.51596	3.98374	4.0301	3.89261	1.88571	2.98282	3.20471	2.86409	3.19238	4.00576	3.57393	3.42192	3.02547	3.63255	3.6013	3.91886	3.19243	3.53825	4.80965	5.97547	5.12367	4.15882	2.5743	4.7228	4.87024	4.43282	4.43282	4.43282	4.80786	4.99987	4.77762	5.38763	4.83228	4.6712	5.16684	2.7473	2.43378	4.05635	5.20746	4.92658	3.71509	4.39219	4.34749	3.59058	4.36604
TYW3	1.38471e-07	-6.85864	2.10352e-05	0.652299	2.83804	1.81383	2.73962	1.80466	2.10281	1.40125	1.84686	2.33924	2.6242	2.31639	2.61196	2.09581	2.31002	2.58641	2.79426	2.42074	2.05562	2.37402	2.72265	2.9696	3.25997	3.27124	3.31354	2.5764	2.00308	3.47032	3.47032	3.47032	2.47562	3.50169	2.97309	2.5445	2.59355	2.45822	3.19549	2.99562	2.82402	1.89811	2.54248	3.23509	2.965	1.63527	3.21077	2.87778	2.45146
FARSB	1.39488e-07	-6.85546	2.10556e-05	0.594803	4.26738	3.71165	3.8898	3.55825	3.38335	3.1833	3.35523	3.42042	4.35707	3.69271	3.67633	3.63804	4.33838	3.98083	3.98649	4.07656	3.48922	3.98801	4.23357	4.785	4.45155	4.42621	4.52087	4.11884	3.68737	4.55186	4.55186	4.55186	3.84183	5.30973	4.5958	4.09473	4.47257	4.43052	4.57377	4.60351	3.89852	3.74894	4.32118	4.48214	4.29979	3.34099	4.47807	4.43547	3.75334
TRUB2	1.42122e-07	-6.84734	2.12159e-05	0.540848	3.59062	3.3474	3.59172	3.46401	2.71312	2.17853	2.67996	3.1171	3.52491	3.13924	2.67421	3.21145	3.35712	3.45419	2.86283	3.16639	3.07049	3.26466	3.55865	4.12511	3.86225	3.81128	3.65895	3.70515	3.23994	3.61296	3.61296	3.61296	3.25648	4.26256	3.75388	3.67093	3.50138	3.76527	3.89796	3.72252	2.91855	2.96761	3.17643	3.88668	3.64066	2.56171	3.95206	3.91513	3.48738
HLTF	1.42329e-07	-6.84671	2.12159e-05	0.593529	3.45261	2.84536	3.34722	2.23384	2.52923	2.38792	2.10046	2.81291	3.18366	3.18599	3.1167	3.14521	3.14469	3.22182	3.08576	3.36972	2.84563	2.85793	3.62979	4.15509	3.8443	3.93519	3.66988	3.61473	3.29708	3.49905	3.49905	3.49905	2.91287	4.17231	3.33736	2.90879	3.46273	3.57646	3.44425	3.65534	3.19522	2.86138	2.89852	3.87103	3.22272	2.91276	3.91489	3.95239	3.40142
IDI1	1.459e-07	-6.83594	2.1417e-05	-1.12058	5.55203	6.38191	4.75702	4.69146	5.19956	7.79033	4.67434	5.96371	5.03483	4.9612	8.69514	6.44745	5.06391	4.87142	6.44789	5.4589	6.17095	5.70837	4.8872	4.64415	5.13847	4.54336	4.86317	5.07899	5.35364	5.14192	5.14192	5.14192	5.79203	4.87717	4.98499	5.35565	4.90855	4.73345	4.20456	4.86666	6.15815	4.87475	5.45432	4.86994	4.29676	6.34073	4.70836	4.60649	6.11902
ATP6V0E2	1.46063e-07	-6.83546	2.1417e-05	0.785315	3.64391	2.84536	3.19104	2.79459	2.70293	2.20335	2.57229	3.55888	3.23522	3.12011	2.6589	2.31251	3.63914	3.15229	2.78015	3.19725	2.94992	3.14461	4.65452	3.64959	4.06806	4.02471	3.8246	3.57051	3.25444	3.59975	3.59975	3.59975	3.08535	4.4411	4.21628	3.84125	3.83977	3.4873	4.89162	3.72252	3.69101	2.73171	2.48361	3.8684	3.99079	2.11856	3.91865	4.16093	3.08431
AC015871.4	1.46372e-07	-6.83454	2.1417e-05	-0.71215	4.15551	4.76054	3.60416	4.6113	5.02647	5.46865	4.92033	4.22985	4.51493	4.46589	5.08221	4.08934	4.48464	4.55086	5.27086	4.47525	4.28645	4.41264	4.32216	3.34605	3.09973	2.16305	3.98196	3.73407	4.45913	3.68974	3.68974	3.68974	4.53777	3.439	3.93072	3.64355	3.55135	3.57646	3.14952	3.15	4.91158	4.06834	4.26635	3.16833	4.18662	4.32822	3.51389	3.86911	4.57679
RASGRP1	1.48287e-07	-6.8289	2.15649e-05	0.864319	6.27164	5.65215	6.01528	4.50882	4.76998	4.84031	4.61046	5.90688	5.91229	6.00248	5.45671	4.82701	6.16729	5.30582	5.69989	5.91538	5.62505	5.36834	7.16594	6.39991	6.06337	6.11083	6.61927	6.10478	5.9324	6.54848	6.54848	6.54848	5.35973	7.52886	6.53308	5.61018	6.47264	6.33685	6.44949	6.92242	6.30828	4.9832	5.11156	6.77516	6.57082	4.49567	7.05016	6.96811	5.7269
AC079915.1	1.52741e-07	-6.81604	2.1986e-05	-0.815789	1.68961	2.09206	2.07901	1.409	2.34489	2.87879	2.14624	2.0608	0.670449	2.31639	2.73388	2.65163	2.10815	2.3227	3.30861	1.39879	1.85535	1.95802	1.01025	1.36016	0.463973	0.900893	1.14389	0.883218	1.2834	1.211	1.211	1.211	0.842085	1.59392	0.991463	0.973633	1.19773	0.779612	0.210186	1.45997	2.34579	1.46233	1.66457	1.50731	1.44967	2.80944	0.983413	1.12423	1.50011
DISC1-IT1	1.53489e-07	-6.81392	2.1986e-05	-0.930865	2.57553	4.18588	2.85862	2.75535	3.33797	3.69305	3.12312	3.42894	1.90332	3.13924	2.44347	2.92602	2.85303	3.111	3.3945	3.74178	3.55684	3.60276	2.57183	2.44679	0.346459	1.22252	2.34805	2.02253	2.03702	1.8835	1.8835	1.8835	2.71693	2.19661	1.81633	2.06976	2.10082	2.11701	0.488634	1.49112	2.70529	2.65429	2.92531	2.193	1.02132	3.82444	1.46692	1.64482	3.16104
HOOK1	1.53948e-07	-6.81263	2.1986e-05	0.873766	1.95591	0.805843	1.35307	1.00273	1.02399	0.199779	1.34324	1.59944	0.942764	0.691805	1.6546	0.832346	1.93574	1.55249	1.5619	0.557881	1.22568	0.551104	1.68059	2.44679	2.50977	3.14763	2.30663	2.09567	1.82026	2.23046	2.23046	2.23046	1.9114	2.82221	2.40082	1.56622	1.80374	2.1616	1.95081	2.2966	1.14167	2.18908	1.76687	1.97595	1.86374	0.500661	2.49504	2.24649	1.69851
LINC01303	1.5679e-07	-6.80468	2.22586e-05	-1.14574	2.71227	5.29803	2.42593	3.33684	3.885	4.16054	2.99554	3.83382	0.0572788	3.29235	3.00003	1.34634	2.87442	3.89221	3.21729	3.67758	3.16018	2.95995	2.83531	2.33339	2.14941	1.46112	2.26399	2.85443	3.48708	2.03505	2.03505	2.03505	1.93282	1.90348	1.85282	1.95568	1.50722	2.28766	0.68558	2.27886	2.88772	2.79078	2.42223	1.08697	0.537969	4.48314	1.42524	1.78359	3.6453
LRRN3	1.60545e-07	-6.7944	2.26569e-05	2.50829	2.24269	-0.755238	0.594923	1.00273	-0.263041	-4.36345	-1.84161	-0.421936	0.857579	-2.16708	1.22633	-0.431714	0.305315	-1.46542	1.38668	-0.0672424	-4.36345	2.57318	0.828629	1.87426	3.64304	2.22192	4.27822	1.18082	1.36583	1.77804	1.77804	1.77804	1.0127	4.79821	2.44929	0.362307	-0.420644	2.3849	3.61829	1.22073	-1.79419	-0.90389	-0.332713	1.62401	3.21632	-2.03644	2.16866	2.01251	1.42741
IGLV6-57	1.64796e-07	-6.78305	2.31198e-05	2.64157	4.21471	1.39613	3.78987	3.5696	-3.39983	1.35768	1.60604	-0.690726	1.24066	1.91161	1.52547	0.210463	2.17862	0.900851	1.6882	0.679439	0.900849	2.73541	5.3607	5.82627	3.63888	1.35991	-1.20825	4.10562	3.72429	4.26175	4.26175	4.26175	1.67768	0.922091	3.12999	4.29275	3.7938	7.77441	4.84087	2.83491	0.975706	3.9759	4.3379	3.44706	2.5731	3.00918	2.79416	2.46849	4.11531
POLR3H	1.66205e-07	-6.77936	2.31311e-05	0.591326	3.93613	3.22686	3.86933	3.59205	3.14066	2.58969	3.09226	3.45421	3.89989	3.39937	3.25551	3.48577	3.82089	3.75822	3.24837	3.50742	3.18176	3.96638	3.89535	4.1289	4.39595	4.30892	4.20121	4.13628	3.7501	4.03857	4.03857	4.03857	3.40179	4.46227	4.3658	3.79638	4.19453	3.90297	4.45459	4.38456	3.69101	3.29796	3.24184	4.1687	4.11282	2.75486	4.30503	4.3119	3.54578
GRWD1	1.66815e-07	-6.77776	2.31311e-05	0.624235	3.73861	2.925	3.85898	3.15276	2.89423	2.34394	2.79938	3.2481	3.34883	3.54274	3.03603	2.95208	3.52205	3.79127	3.20677	3.2956	2.74776	3.58157	4.55932	4.14765	4.09867	4.14367	4.13177	3.8229	3.74497	3.70214	3.70214	3.70214	3.31474	4.2228	3.96028	3.38715	3.80414	3.79742	3.81624	4.16066	3.0635	3.39634	3.53065	4.28945	3.7685	2.35708	4.28769	4.10246	3.60741
NF1	1.72786e-07	-6.76249	2.37009e-05	-0.532174	7.09675	7.3809	7.31449	7.1567	7.71292	8.00454	7.61203	7.15838	6.83091	7.35987	8.06088	7.57154	7.20476	7.30906	8.13293	7.36618	7.12315	7.79548	7.28368	6.89557	6.33616	6.25433	7.21849	6.82194	7.05133	6.79139	6.79139	6.79139	6.90683	6.87242	6.76258	6.21301	6.71253	6.67636	6.0914	6.86411	7.56752	6.8375	6.99671	6.98701	6.83925	7.81188	6.86771	6.75375	7.12858
MMACHC	1.72912e-07	-6.76217	2.37009e-05	0.642232	2.21542	1.72761	1.43891	1.30411	1.47099	1.2664	1.05405	1.77015	2.17384	1.77152	1.93441	1.56479	1.89446	1.80637	1.62643	1.85096	1.71441	1.86757	2.3538	2.8092	2.6236	2.47278	2.50275	2.29516	2.50549	2.13606	2.13606	2.13606	2.01544	2.48218	2.5416	2.3323	2.65198	2.52801	2.66191	2.41505	1.33687	2.23235	1.80584	2.6313	2.21104	1.0003	2.53478	2.04047	1.79798
RASGRF1	1.77328e-07	-6.75122	2.38217e-05	-1.76838	1.41181	-1.36402	-1.46663	1.68444	2.17832	1.44354	1.11671	0.00026349	2.79429	-0.121891	-0.340384	5.92452	0.690108	2.61622	0.955651	-0.0672424	-0.222901	-0.0985484	-3.20893	0.723601	2.14941	3.17768	-0.919084	1.5881	0.196513	0.072781	0.072781	0.072781	0.595828	-1.28697	0.288505	1.48629	1.25917	1.96177	1.91984	0.17576	-0.238277	3.15913	0.436308	-0.997182	-0.127599	0.500661	3.19225	0.515975	0.428617
AL121949.2	1.77367e-07	-6.75113	2.38217e-05	-2.08191	0.114151	-0.598518	1.19755	-0.33384	0.266184	0.384776	-1.42981	1.43992	-3.26968	-1.33373	-0.340384	-0.573251	2.45903	-1.46542	0.0861709	4.54889	-2.44779	1.26881	-0.774291	-1.84923	-1.29249	-1.09459	-0.20918	-0.793886	-2.38298	-0.270874	-0.270874	-0.270874	-0.358527	-3.49463	0.817757	-1.60875	-2.01068	-3.09954	-1.57387	0.632212	-0.108309	0.0290014	0.485147	-1.66797	-1.11613	-3.13743	0.202403	-4.36345	-2.41439
TMEM263	1.77675e-07	-6.75037	2.38217e-05	0.692784	3.93164	3.51977	3.95923	3.19737	2.48233	2.8318	2.41911	3.55888	3.341	3.08108	3.40983	4.07162	3.29502	3.53446	3.27881	3.67758	2.93729	3.39988	4.06411	4.50561	4.39348	4.14747	3.99071	3.92677	3.36546	3.82826	3.82826	3.82826	3.55467	4.31877	4.11851	3.47778	4.33668	4.35333	4.25816	4.38456	3.28075	3.20329	3.71597	4.34529	3.58716	2.91276	4.60948	4.22323	3.71822
SIRPG	1.77788e-07	-6.7501	2.38217e-05	1.05784	3.7712	3.48515	3.4334	2.56418	2.62949	1.74347	2.31607	3.61224	3.28501	2.0393	2.38883	0.588286	3.79869	2.34067	2.88937	3.20739	2.65823	2.89275	4.06411	4.1289	3.87292	3.93519	3.96432	3.43616	3.14975	3.56394	3.56394	3.56394	2.83539	5.3415	4.57411	3.21806	3.9695	3.6448	4.55121	3.72252	3.19522	2.94177	2.56537	4.01571	4.26304	2.00623	4.17275	4.10246	3.24099
NT5C3AP2	1.82214e-07	-6.73942	2.42783e-05	1.04332	1.89329	1.01443	1.23003	-1.2481	-0.432442	0.764255	0.732554	1.65862	2.27586	0.885504	0.255983	0.0264459	1.76301	0.800535	1.09899	1.12689	0.613899	1.49713	2.64234	1.9446	2.44454	1.41141	2.33437	1.84301	0.859074	2.53791	2.53791	2.53791	1.09099	2.8546	2.18882	1.16548	2.55732	1.94911	1.75418	2.70807	2.20285	0.718075	1.06943	2.02394	2.13174	0.500661	2.56388	1.83238	1.96138
MRPS27	1.88612e-07	-6.72443	2.49911e-05	0.57663	4.3814	3.82671	4.11948	3.37619	3.48796	3.2681	3.26128	3.67808	4.49391	3.95807	3.83462	4.26077	4.12296	4.00919	3.99873	4.19852	3.88746	3.85897	4.75341	4.90892	4.54342	4.32914	4.603	4.37534	4.09031	4.61447	4.61447	4.61447	3.97683	5.17998	4.55209	4.17977	4.45627	4.44186	4.76449	4.64911	3.97383	3.44312	3.99001	4.72068	4.77248	3.1533	4.55012	4.54928	4.06427
IMP4	1.91717e-07	-6.71734	2.51247e-05	0.52675	4.08802	3.50256	3.93482	3.24065	3.30466	3.1325	3.11546	3.5972	4.03211	3.88062	3.7432	3.42192	3.84818	3.73802	3.78214	3.86222	3.84075	4.03552	4.30052	4.40941	4.18393	4.18494	4.2889	4.12322	4.04932	4.15748	4.15748	4.15748	4.2008	4.64	4.34033	3.97172	4.30426	4.27432	4.36547	4.40516	3.45908	3.29796	3.60986	4.52613	4.21896	3.06633	4.29927	4.44856	3.57972
SLAMF1	1.91727e-07	-6.71732	2.51247e-05	0.792182	3.83911	3.57018	3.55374	2.75535	2.20745	2.32144	2.27545	3.0413	3.42482	3.39141	2.88629	3.59733	3.62028	3.15229	3.59325	3.11344	3.13828	2.74814	3.70421	4.45229	3.99835	3.56638	3.75445	3.98568	3.11044	3.95463	3.95463	3.95463	3.27337	5.18157	4.12599	3.61565	4.60566	3.87311	4.1655	4.52666	3.18258	2.60577	3.03599	4.15368	4.21576	2.47995	4.14092	3.95239	3.62918
LAIR1	1.94114e-07	-6.71194	2.52985e-05	-0.765062	6.31371	6.95478	6.00124	7.32782	6.11171	6.12387	5.66119	5.97248	5.70693	6.15006	8.08004	8.53598	5.75222	7.12687	7.56482	6.34092	5.91644	6.65797	6.19838	5.83092	6.05481	6.3139	6.37487	6.20321	5.74875	6.16204	6.16204	6.16204	6.06604	6.0686	5.815	5.77693	5.4807	5.1575	5.78377	6.13693	6.57577	5.89559	6.03875	6.16149	6.0291	5.25944	5.81787	5.64087	6.08397
SPTLC2	1.95387e-07	-6.7091	2.5326e-05	-0.947131	8.43339	8.6101	9.01448	8.82249	9.69735	8.67065	8.6081	9.33595	7.53299	8.5924	9.61152	9.51459	8.44263	9.33558	9.03757	10.1639	9.15739	10.3334	8.74818	7.61297	7.28472	7.7074	9.03848	7.62063	7.68527	7.86927	7.86927	7.86927	7.7377	8.6226	7.96076	7.1656	7.86574	7.63163	6.98688	7.24208	8.09301	7.5826	8.4784	8.41102	7.57514	9.72124	7.20519	7.59928	8.35777
CYSTM1	1.98438e-07	-6.70238	2.55436e-05	-1.26802	6.61901	7.07094	5.83439	6.81164	7.30222	9.37166	6.79591	6.66879	5.90568	7.07453	9.01205	7.82925	6.47005	6.91531	7.46248	6.96871	7.23703	6.9293	6.39295	5.33433	5.14728	2.88162	6.02725	6.2973	6.82174	5.278	5.278	5.278	7.1243	5.02143	6.42135	6.38335	6.06514	6.45128	4.52573	5.49471	8.2183	6.80831	6.87715	4.33582	5.26896	7.06057	5.2295	5.07868	7.36388
H2AX	1.99208e-07	-6.70069	2.55436e-05	0.795317	4.40955	3.98374	3.57285	3.94588	2.83012	3.2681	3.34872	3.84022	3.85114	3.76838	3.39142	3.55543	3.3108	4.58895	3.89122	4.12016	3.75698	3.84126	5.07227	5.02912	4.81815	4.32914	3.8197	4.59934	4.67659	4.26733	4.26733	4.26733	4.32748	5.85011	4.633	5.05681	4.31876	4.49292	5.21547	3.52594	3.30428	3.80016	4.59034	4.69423	4.30582	3.84418	4.17275	4.21712	3.84922
SLC22A15	2.04835e-07	-6.6886	2.60112e-05	-0.73613	6.91467	6.6766	7.01299	7.37309	7.58384	8.26657	7.49122	7.54841	7.10023	7.66799	7.84404	7.70303	6.58965	7.4764	7.37186	7.80315	6.92469	7.6918	6.46184	6.62542	6.27315	5.50826	6.74797	6.37004	6.87784	6.94503	6.94503	6.94503	6.85728	5.67304	6.49101	6.46446	6.2151	6.75167	5.5255	6.0624	7.62706	7.42488	7.21827	5.64458	6.24075	7.99227	6.06348	6.54093	7.3076
PKIA	2.05036e-07	-6.68817	2.60112e-05	0.898915	2.78484	2.67153	2.85862	1.50677	0.956956	1.35768	1.17676	1.01094	2.13816	2.47538	2.03272	2.0239	1.83023	2.06607	1.59453	2.66107	2.21061	1.58491	2.58621	2.98637	2.80531	3.19982	3.00377	3.69929	2.26893	2.93832	2.93832	2.93832	2.93427	2.87052	3.24428	2.4423	2.7191	2.65039	2.56517	2.12846	1.98715	1.30911	3.21314	2.47435	3.14407	4.02226	2.72714	2.76503	2.67726
ZFAND1	2.06616e-07	-6.68484	2.6073e-05	0.594835	2.99091	2.15947	2.73962	1.59834	2.31843	2.15327	2.44377	2.49347	3.16605	2.41387	2.7192	2.3522	3.02547	2.39328	2.29597	2.17417	2.67354	2.08387	3.21433	3.01934	3.36443	3.39151	3.25668	2.89598	2.33862	3.3598	3.3598	3.3598	2.5468	3.46545	3.17392	2.78062	2.8346	2.78474	2.98723	3.36707	2.65126	1.69661	2.82454	3.36373	3.10999	2.26244	2.99981	2.97512	2.79751
SEPHS1	2.07797e-07	-6.68236	2.6084e-05	0.521186	3.80578	3.45863	3.6648	3.25479	3.19984	2.87879	2.66955	3.13805	3.72455	3.43076	3.26565	3.17871	3.47382	3.73802	3.77504	3.45731	3.19243	3.76814	4.02769	4.28953	4.07115	3.87227	3.90079	4.00479	3.78047	4.06443	4.06443	4.06443	3.44715	4.48314	3.73446	3.90411	3.69166	3.8392	3.98655	3.72907	3.31591	2.91547	3.71085	4.07614	3.99453	3.00918	4.07169	3.6777	3.46938
SDR42E1P5	2.0985e-07	-6.67809	2.62038e-05	-1.62111	1.06332	2.71699	-0.178042	2.51803	1.81176	2.29858	2.03707	2.9495	-0.386529	1.88919	2.25267	3.94755	0.53757	2.44404	1.00503	0.791546	0.847844	2.04313	1.3166	-0.443281	0.912929	0.623679	0.0801588	-0.343602	-0.140234	-0.406389	-0.406389	-0.406389	0.424986	-0.810066	0.119093	-0.173839	-2.01068	0.691125	-1.7619	-2.12819	0.915854	2.12166	1.84379	-1.34179	-1.75521	2.80944	-1.17735	-1.4567	0.740093
TTC26	2.18517e-07	-6.66051	2.70623e-05	-1.27295	3.01141	3.03678	3.8275	3.5468	4.52009	5.15541	4.24715	4.60938	1.62267	2.82167	2.85975	1.97389	4.24704	3.40379	1.05278	4.90724	4.38275	4.49047	1.2092	1.25337	2.01466	1.78773	3.9329	0.660273	2.59935	2.00866	2.00866	2.00866	2.51875	2.55296	2.56378	2.38835	2.48201	2.09419	0.530233	3.48783	2.80765	3.22487	2.93413	1.3201	1.10675	3.6485	2.39063	2.43729	3.2052
ITGA7	2.18995e-07	-6.65957	2.70623e-05	-1.57314	3.24282	3.65048	1.29286	4.85819	3.16314	3.84276	2.76066	4.13926	1.20661	4.80825	5.95522	6.63813	1.80817	2.97953	3.51018	2.38544	2.92454	3.63738	2.58621	3.5572	2.9331	3.45423	0.790357	1.03968	2.88675	1.64726	1.64726	1.64726	3.27337	0.760585	3.59601	2.67642	1.50722	4.23834	2.24119	1.22073	3.24471	2.81944	1.33223	1.73196	0.930511	4.3094	1.65896	1.69844	4.10369
MIR223HG	2.21112e-07	-6.65539	2.70908e-05	-0.852194	10.0596	10.6144	9.81278	10.3088	10.6727	11.9821	10.536	10.7141	9.47869	10.2692	11.5882	11.0345	9.77421	10.8271	10.6959	10.1694	10.2867	10.8156	9.2774	9.78119	9.65099	7.98048	9.63425	9.30148	10.4859	9.64348	9.64348	9.64348	9.89851	9.25457	10.0639	9.61508	9.64204	9.96217	8.35597	9.43649	10.1134	9.90361	10.2484	9.00897	8.82874	10.8979	9.21318	9.07895	10.873
STX11	2.22345e-07	-6.65297	2.70908e-05	-0.894489	7.70832	9.09641	7.95318	8.11053	8.24255	9.03021	7.19575	8.70163	6.7093	7.97296	8.24774	8.38151	7.50179	7.91539	8.49964	8.73451	9.28359	9.00493	7.64994	7.15489	6.99369	7.05877	7.44692	7.33086	7.6356	7.29689	7.29689	7.29689	7.80131	7.17492	6.89369	7.64865	6.75912	7.17246	6.16339	7.01843	7.47788	7.59405	7.97736	7.01726	6.7798	9.30672	6.31597	6.1241	7.90475
PCSK9	2.22633e-07	-6.65241	2.70908e-05	-1.79948	1.29724	-0.328437	-1.10085	4.5438	1.14938	1.00918	1.93644	1.26055	0.396197	0.973401	3.49852	4.89577	-0.220997	2.61622	0.61755	-0.277448	-0.610927	0.766647	-1.30053	-0.536026	1.94898	2.97869	-2.05477	0.14404	1.19596	-0.814162	-0.814162	-0.814162	0.748564	-2.25755	1.23208	1.58553	0.480997	1.52312	1.09893	-0.623432	-1.44124	2.87509	2.31825	-1.44254	-1.25135	2.52956	-0.129002	0.347199	-0.106352
PRKRA	2.28656e-07	-6.64082	2.76824e-05	0.495689	3.723	3.41332	3.31731	2.95908	3.17056	3.1833	2.7898	3.52748	3.8177	3.03075	3.27573	3.31551	3.36469	3.5881	3.44905	3.36972	3.09344	3.6645	3.88376	3.60142	3.62633	3.35252	3.76978	3.74548	3.2105	4.21922	4.21922	4.21922	3.50549	4.24129	4.24745	3.58719	3.9228	3.95139	3.85768	3.85416	3.44855	3.33812	3.40302	3.8684	4.14347	2.80944	3.82159	3.78073	3.49333
TDP1	2.33066e-07	-6.63252	2.79801e-05	0.602322	4.26302	3.99609	3.99274	3.41448	3.57994	3.06638	3.30229	3.58961	4.12161	4.14948	3.48989	3.87447	4.08677	4.07509	3.59325	3.84932	3.45419	3.63053	4.38931	4.5172	4.37609	4.22507	4.55369	4.25278	3.96809	4.3694	4.3694	4.3694	3.71777	5.07738	4.54653	4.02219	4.63202	4.45536	4.43283	4.65943	3.85137	3.47048	3.74634	4.44208	4.43807	2.97378	4.72348	4.64113	3.69776
QSOX1	2.33461e-07	-6.63179	2.79801e-05	-0.772122	6.62064	7.08185	6.39318	8.1332	7.43746	6.80947	6.8337	6.30898	6.26223	6.99276	8.8092	7.74043	5.89902	6.14665	7.31549	6.41936	6.97499	7.02917	7.03511	6.75646	6.04306	5.52735	6.18413	6.30888	6.91653	6.41853	6.41853	6.41853	7.07518	6.12195	6.23088	6.43416	5.37712	6.74756	5.83239	5.51191	6.8571	6.71893	6.67097	6.37174	6.33006	6.45855	5.56191	5.82791	6.55552
RCBTB2P1	2.41898e-07	-6.61637	2.88463e-05	-1.446	-0.884984	1.35838	-1.46663	-4.36345	-0.525238	-1.8146	-1.84161	1.26055	-0.610974	-1.56186	0.255983	1.13505	-1.42532	0.31042	-1.13997	-0.664443	0.847844	-0.786333	-1.80165	-1.11807	-1.7353	-0.331535	-0.919084	-2.27199	-2.38298	-2.34228	-2.34228	-2.34228	-0.164108	-1.78886	-2.44298	-1.44308	-2.75274	-0.753255	-1.12329	-3.20243	-2.26246	-0.727732	-0.958773	-2.09011	-1.56702	0.207416	-2.02695	-2.58221	-0.725963
PDIK1L	2.50997e-07	-6.60033	2.96146e-05	0.659116	2.66628	2.02134	2.43988	1.30411	2.11823	1.80964	1.53898	2.10402	2.46052	1.88919	2.87309	2.04827	2.03405	2.0443	1.5619	2.60079	2.07881	2.69653	2.48239	3.02746	3.42848	3.0454	2.99511	2.51106	1.71936	3.03304	3.03304	3.03304	1.97472	2.86258	2.59643	2.83003	2.7191	2.65819	2.77869	2.55431	2.6695	2.09846	2.89852	3.21869	3.02475	0.952594	3.06233	2.47874	2.64556
DPP4	2.51429e-07	-6.59958	2.96146e-05	1.00452	3.56318	3.78463	2.54686	1.98513	2.91203	0.951733	2.0043	3.22871	1.98592	2.28238	2.46123	1.08881	3.52881	2.49307	3.07424	3.00133	3.05888	3.21966	4.10963	3.87794	3.33388	4.05741	3.74415	3.14026	3.32482	3.72664	3.72664	3.72664	2.64089	5.35571	4.38773	3.24867	3.92754	3.53044	3.54915	3.65534	3.1043	2.70124	2.96889	3.82029	4.03505	2.47995	3.80137	3.99943	3.32344
RRM1	2.52066e-07	-6.59849	2.96146e-05	0.680842	4.14346	3.40409	4.14098	3.50007	3.12548	2.89412	3.19021	3.44584	3.69416	3.66658	3.72125	3.20062	3.78181	3.95772	3.4843	3.96741	3.44529	3.38366	4.38108	4.89567	4.33555	4.28841	4.14358	3.99048	3.93246	4.18426	4.18426	4.18426	3.64827	5.9621	4.14818	4.28095	3.74632	4.09912	3.95253	4.19417	3.68206	3.61642	3.95143	4.68829	4.08151	3.56372	4.36136	3.8336	3.93476
FKBP15	2.60058e-07	-6.58493	3.01667e-05	-0.544493	7.42916	7.94179	7.68838	6.98813	8.09764	8.15925	7.68039	7.42549	7.33253	8.1437	8.44893	7.99982	7.77738	7.96186	7.6243	7.59729	7.96424	8.09081	7.33833	7.05211	6.67515	6.924	7.70312	6.77539	7.1123	7.2596	7.2596	7.2596	7.36979	7.33806	6.78104	6.78048	6.61088	6.71193	6.32428	7.27993	7.82562	7.31724	7.90321	7.46534	7.28679	7.77722	7.0463	6.93266	7.82297
STMN1	2.60467e-07	-6.58425	3.01667e-05	0.971694	4.34216	3.62686	3.54731	3.58087	2.47036	2.47204	2.89186	3.62713	3.16605	3.56414	3.93337	3.67763	3.3495	3.94015	4.05257	4.04863	3.23434	2.89275	4.73417	5.14007	4.66703	4.44177	3.65895	4.14492	4.4716	4.66183	4.66183	4.66183	3.78409	6.47363	4.3815	4.8388	4.34379	4.57764	5.27633	3.72252	3.30428	3.77112	4.68745	4.6087	3.65491	3.45665	4.31647	4.2534	3.92599
AL592429.2	2.60928e-07	-6.58348	3.01667e-05	-1.50351	0.788614	-0.598518	-0.459418	-0.95986	0.266184	0.295241	-0.0435068	-0.846578	2.46052	-0.215989	-0.469041	5.25371	-0.522645	-0.0156235	-0.337477	-0.277448	-0.341015	-0.401837	0.0857023	0.87536	1.11809	1.10233	0.478525	0.8413	-0.218159	-0.722865	-0.722865	-0.722865	-0.466535	-0.810066	0.924469	1.0311	0.803196	0.721228	1.46344	0.0969434	-0.381123	0.994239	-0.512803	-0.719225	0.363819	-1.18788	2.10409	0.803809	-0.840993
IARS1	2.63064e-07	-6.57994	3.01667e-05	0.630983	5.64057	5.32764	5.5035	4.79185	4.66101	4.14781	4.32882	5.0124	5.39558	5.38238	4.88247	5.00252	5.37842	5.42643	5.36842	5.44825	4.99277	4.85066	6.21698	6.43698	5.70299	5.67159	5.73893	5.63977	5.53974	5.67205	5.67205	5.67205	4.90045	6.65293	5.692	5.32151	5.61012	5.64845	5.75226	5.90503	5.25434	4.72377	5.44971	5.63302	5.60619	4.52858	6.23234	5.96275	5.26528
MPRIP	2.63089e-07	-6.5799	3.01667e-05	0.574936	6.59221	6.40755	6.77721	5.80026	5.86782	5.32617	5.78934	5.97539	6.50302	6.16763	5.87632	5.80268	6.61051	5.91589	6.25089	6.23708	5.82855	6.23471	7.21072	6.7662	6.65109	6.37028	6.75889	6.4868	6.36201	6.66187	6.66187	6.66187	6.21224	7.3186	6.73107	6.37088	6.82917	6.47521	6.856	6.9549	6.42961	5.7319	5.81466	6.99275	7.18407	5.63489	7.04415	6.94796	6.13908
ZNF333	2.68681e-07	-6.57076	3.06605e-05	-0.485851	5.57705	5.76467	6.0498	5.89811	6.245	6.11408	6.66116	5.9681	5.82523	6.21461	5.98469	4.9614	6.11321	5.5455	5.47083	5.6003	5.99014	5.92287	5.18994	5.4537	5.27472	4.75996	5.7101	5.29625	5.57048	5.64339	5.64339	5.64339	5.34383	5.32136	4.85611	5.00038	5.70701	5.63665	4.9445	5.78917	5.55337	5.41735	5.88573	5.3698	5.25655	5.92482	5.43641	5.46254	6.1016
AC118549.1	2.71728e-07	-6.56587	3.08336e-05	0.555587	4.6154	3.89423	4.43713	3.53526	3.56313	3.87402	3.64821	4.21021	4.58947	4.18673	4.29209	4.3663	4.47066	4.30759	4.24981	4.47945	3.77128	4.23863	4.55201	4.91112	4.72704	4.74247	5.04206	4.38995	3.84416	4.96615	4.96615	4.96615	4.2613	5.40027	4.8606	4.0981	4.79646	4.39361	4.80953	5.04782	4.5622	3.90415	4.20935	4.95161	4.63305	3.55576	5.05943	4.8803	4.33326
FAM102A	2.72783e-07	-6.56418	3.08336e-05	0.984898	6.02169	5.52799	5.97992	4.98236	4.96169	3.4346	4.94428	5.42831	5.14902	4.59966	5.10216	5.49221	5.88592	5.08905	4.83525	5.37591	4.6576	5.82412	6.40517	6.29444	6.45685	6.37758	6.79615	5.59475	5.75003	6.08911	6.08911	6.08911	5.19224	7.31533	6.85598	5.5912	5.70563	6.05454	6.60723	6.07916	5.5753	4.68926	4.69266	6.36896	6.84392	3.66339	6.47571	6.28901	5.60858
CCND2	2.75826e-07	-6.55937	3.10304e-05	0.653136	7.13674	6.70226	7.11051	6.23236	5.93031	5.71295	6.06434	6.66608	6.56226	7.05955	6.89709	6.31813	6.64281	6.34555	6.64378	7.15382	6.6005	6.26713	8.02399	7.80687	6.98961	6.99428	7.14696	7.14791	7.31782	7.288	7.288	7.288	6.37266	8.18904	7.36519	6.83192	6.92053	7.15946	7.15669	6.90878	6.90983	6.434	7.0993	7.74812	7.06771	6.63324	7.52641	7.51587	6.91809
MICAL3	2.77205e-07	-6.5572	3.10392e-05	0.612932	4.7461	4.51671	4.85916	3.91059	3.92501	3.59328	3.88713	3.54326	4.5184	4.31003	3.88155	5.3646	4.01636	4.40475	3.91724	3.96741	3.84075	4.52047	4.99353	5.0392	5.17196	4.81357	4.97755	4.79595	4.88429	4.71586	4.71586	4.71586	4.36735	4.99806	5.25074	4.54289	5.44479	4.95863	4.85321	5.65461	3.96648	4.89845	4.08417	5.31685	4.90558	4.08444	5.04917	5.16374	4.35629
NAA30	2.78882e-07	-6.55458	3.1081e-05	0.506534	4.35598	3.63477	4.05297	3.50007	3.42735	3.72769	3.10004	3.90886	4.21018	3.89757	4.52949	4.36145	4.14952	4.0911	4.0169	4.04298	3.67567	3.88802	4.57021	4.49393	4.60228	4.5832	4.69682	4.48829	3.77545	4.51013	4.51013	4.51013	4.18749	4.88895	4.47225	3.96804	4.80421	4.45536	4.64886	4.67647	4.25315	3.93065	4.09207	4.73084	4.52599	3.82444	4.72992	4.44072	3.81638
MCM6	2.80276e-07	-6.55241	3.10911e-05	0.74284	4.20811	3.8676	3.4814	3.2964	3.22142	2.6084	3.23327	3.38581	3.70029	3.73104	3.95234	3.13387	3.69431	3.73122	3.98033	3.99109	3.6983	3.45528	4.71793	4.67293	4.09564	4.2676	3.70749	4.22044	4.34183	4.03857	4.03857	4.03857	3.85311	5.87302	4.26448	4.31026	4.09274	4.24613	4.27966	3.90709	3.57002	3.1251	4.26984	4.5043	3.89397	3.21525	4.28186	3.91513	4.33326
NHP2	2.8933e-07	-6.53861	3.19468e-05	0.587991	3.13893	2.40144	3.00654	2.56418	1.97312	2.32144	2.14624	2.58783	3.34883	2.91342	2.05629	2.1643	2.58114	3.08991	3.03911	2.73304	2.57914	3.48601	3.49909	3.49411	3.64304	3.13237	3.14362	3.0694	3.31794	3.39079	3.39079	3.39079	2.66669	3.75428	3.35655	3.50338	3.38906	2.86109	3.9255	3.12042	2.87206	2.2949	2.92531	3.22691	3.15079	1.72318	2.97836	3.0731	2.81661
PGAM5	2.9237e-07	-6.53407	3.21337e-05	0.532083	3.82812	3.22686	3.723	3.16779	2.98113	2.99709	2.8089	3.26724	3.65051	3.68622	3.1931	3.20062	3.53554	4.07509	3.40374	3.44021	3.26498	3.78059	4.10963	4.41251	3.9853	4.01226	3.96875	3.92175	3.94593	3.78614	3.78614	3.78614	3.71777	4.70138	4.23713	4.22357	3.89404	3.91929	4.26125	3.93568	3.2325	3.37719	3.58767	4.2597	3.90196	2.83597	4.06153	3.69539	3.31002
GPATCH4	2.96618e-07	-6.5278	3.24511e-05	0.612934	2.8813	2.20272	2.60991	2.39574	2.25007	1.63817	1.49248	2.47713	2.32429	2.47538	2.64342	2.44689	2.59409	2.87242	2.61504	2.38544	1.80061	2.30677	3.07851	3.08309	3.23263	3.21439	2.97762	2.81166	2.36558	3.2514	3.2514	3.2514	2.23822	3.81314	3.16669	3.04753	2.79367	2.77042	3.10891	3.02785	2.53671	2.68576	2.11602	3.09384	2.97261	1.69447	3.32283	2.93846	2.45146
SUCLG2	2.98106e-07	-6.52563	3.2465e-05	0.548425	4.42122	4.00833	4.27541	3.25479	3.92062	3.65756	3.40629	3.95089	4.40664	4.20954	3.81403	4.20224	4.02116	3.78472	3.93646	4.24848	3.88746	4.38438	4.80043	4.54293	4.58509	4.45103	4.79492	4.35314	3.94145	4.81249	4.81249	4.81249	3.90279	5.12959	4.55763	3.91941	4.42645	4.35333	4.74254	4.67986	4.27118	3.6	3.89381	4.73805	4.61129	3.17425	4.76375	4.51979	4.16086
TPD52	2.99895e-07	-6.52303	3.25114e-05	0.850357	4.07734	3.40409	3.58546	3.5468	2.38369	3.06638	2.7898	2.93761	3.72455	3.21332	3.77195	4.4326	3.59473	3.23149	3.33781	2.48884	2.87242	3.51609	4.24268	5.197	4.5028	3.65983	3.64794	4.29221	3.63292	4.34851	4.34851	4.34851	3.77225	4.3475	4.17724	4.02573	4.4298	4.66927	4.50762	4.41331	2.88772	3.541	3.8618	3.88148	3.97572	3.41326	4.44716	4.18304	3.78278
LDHB	3.03829e-07	-6.51737	3.27887e-05	0.911144	1.60773	1.19663	0.907541	0.621302	0.5652	0.199779	0.421133	0.964793	0.942764	-0.215989	1.14074	-0.431714	1.61838	1.38939	1.14377	0.944893	0.334534	0.954133	1.857	2.25252	2.3561	1.91805	1.88697	1.70957	1.07048	1.61262	1.61262	1.61262	0.424986	2.51294	2.40082	1.28841	1.60511	1.82984	1.6822	1.86862	1.193	1.18248	1.1011	1.50731	1.55475	0.123742	2.31277	1.98401	1.32441
MKNK1	3.07412e-07	-6.51228	3.3026e-05	-0.866663	7.86587	9.03902	7.52991	8.98188	8.66515	9.25907	8.64278	8.08452	7.34579	8.40778	9.48238	8.52245	8.11667	7.49457	8.59166	7.79645	8.04115	8.26507	7.19262	7.37781	7.0848	5.7068	7.34193	7.70303	8.19166	7.26344	7.26344	7.26344	8.495	7.1106	7.07548	7.25197	6.89959	7.31529	6.35209	7.2816	9.01857	8.14657	7.82622	6.6799	6.77056	8.98955	6.8803	6.83579	8.29424
KIAA1958	3.14593e-07	-6.50225	3.36215e-05	-1.03548	6.64124	6.46531	7.45591	7.48604	7.85287	8.02208	5.33698	7.92458	4.77803	7.31747	7.14458	7.83714	6.85539	7.15698	7.55501	8.20351	7.46037	7.14501	6.84787	5.55554	6.0918	5.4183	7.15233	6.41271	5.98985	6.49124	6.49124	6.49124	4.68071	6.37523	6.72	4.6245	6.07798	6.46802	4.95981	6.55418	6.40533	6.86954	7.03412	5.82404	4.19315	7.61528	6.07448	5.54412	6.95088
SACS	3.16002e-07	-6.50031	3.36215e-05	0.699247	5.08291	4.19662	5.13472	3.40183	4.03066	3.97117	3.75055	4.68959	5.0251	4.05695	5.04147	4.63522	4.85921	4.55472	4.48552	4.65274	4.30131	4.5389	5.22713	5.32612	5.63152	5.55766	5.51934	5.26091	4.4747	5.63694	5.63694	5.63694	4.45508	6.10102	4.91769	4.54782	5.27486	5.3298	4.82215	5.55493	4.88451	4.1552	4.42183	5.50867	5.31456	3.72147	5.59401	5.43516	4.80196
UBASH3A	3.17184e-07	-6.49869	3.36215e-05	1.01789	4.15838	3.46753	3.70579	1.9508	2.7728	1.21849	2.84636	3.96854	3.84008	3.66658	2.91236	2.33249	4.22223	3.111	3.28881	3.53184	3.14927	3.11543	4.44955	3.9352	4.36102	4.53758	4.50875	4.0515	3.70858	4.36681	4.36681	4.36681	3.2394	4.97431	4.91984	3.88865	4.75441	4.18803	4.96361	4.91053	4.10022	2.91547	2.96889	4.44913	4.63545	1.63527	4.63941	4.47697	3.67177
AC010627.1	3.19838e-07	-6.49507	3.37529e-05	-0.826424	2.35719	2.3055	1.29286	2.94171	2.70293	4.09573	2.60545	1.62934	2.69957	2.9572	4.03769	4.12415	1.91525	1.99975	3.3945	2.6161	1.95896	2.08387	1.857	1.97852	2.06513	1.10233	1.86812	1.45546	2.32495	2.14821	2.14821	2.14821	2.7535	1.85628	1.7789	1.16548	1.58126	1.41677	1.32848	1.71875	2.87206	1.56743	2.862	1.70866	1.49262	3.29392	1.763	1.36431	2.3762
PDSS1	3.37096e-07	-6.47225	3.54174e-05	-0.937852	2.94381	3.33773	1.6695	2.56418	3.11014	5.17436	1.88336	2.86409	2.50321	3.91987	4.14599	3.99846	2.16132	3.92831	4.98735	3.17675	2.89872	3.10557	2.66961	2.22452	2.33568	1.84503	2.69691	1.70957	2.79054	2.51933	2.51933	2.51933	2.40074	3.1438	2.46116	2.24998	2.37507	1.96177	1.54688	2.22428	3.00726	1.97654	2.81502	2.07949	2.15866	3.77044	1.92129	1.7331	3.49333
CENPO	3.44218e-07	-6.46317	3.58574e-05	0.608314	3.24014	2.93786	2.75085	2.73531	2.10281	1.96287	1.88336	2.61796	2.82827	2.93548	2.16867	3.02757	2.97686	3.37792	2.91543	2.90491	2.73322	2.77327	3.62284	3.7947	3.27077	3.42321	2.87747	3.26441	3.28301	3.19983	3.19983	3.19983	3.09488	4.27757	3.06926	3.50845	3.10941	3.09748	3.80781	2.7473	2.5167	3.10196	3.39665	3.45058	3.42476	2.83597	3.10914	3.41488	2.82607
ZNHIT6	3.45634e-07	-6.46138	3.58574e-05	0.61992	3.62492	2.8724	3.60416	2.44591	2.69266	2.58969	2.70057	3.18911	3.36435	3.38341	2.54691	3.0993	3.71224	3.27886	3.34742	3.30507	2.76215	3.12522	3.78747	3.8869	3.69605	4.00809	3.98634	3.68158	2.9144	3.88014	3.88014	3.88014	2.98641	4.5637	3.81064	3.1931	3.87944	3.63297	3.80781	4.1799	3.56028	3.31818	3.22037	4.15368	3.8073	2.37529	4.15374	4.06213	3.30326
AC234582.2	3.45795e-07	-6.46118	3.58574e-05	-1.34317	-0.46586	-0.931081	-0.68301	-0.719728	3.16314	-1.46255	0.421133	-1.72575	-2.65476	1.01542	-0.222267	0.0264459	-0.414934	-1.73975	-0.219345	-0.523591	-0.610927	-1.11477	-0.929309	0.0786146	-1.91932	-0.71747	-1.05644	-0.443692	-1.8002	-1.3847	-1.3847	-1.3847	0.00719594	-3.49463	-1.45667	-1.79595	-0.627484	-0.0473203	-0.271487	-1.79186	-0.717846	-0.0726393	-0.172629	-2.6894	-1.40057	-0.16105	-1.31184	-0.642502	-0.840993
CD3E	3.51521e-07	-6.45405	3.60254e-05	0.910642	7.08411	6.31696	6.97996	5.81942	5.47581	5.38432	5.61446	6.97119	6.61431	6.57747	5.89114	5.13642	6.91272	5.81826	6.2925	6.9279	6.47504	6.37675	7.91534	7.12349	7.13587	7.21908	7.64822	7.10372	6.51961	7.37	7.37	7.37	6.19904	8.3432	7.66812	6.59286	7.2952	7.32114	7.68319	7.48584	7.1455	5.5213	5.74868	7.71031	7.28908	5.02299	7.71415	7.79401	6.53621
CXCR3	3.5184e-07	-6.45366	3.60254e-05	1.17086	3.39717	2.20272	3.20744	2.44591	1.26473	1.00918	2.35558	1.99344	3.48996	2.68516	1.6546	0.715471	3.16219	2.26739	2.33511	2.23493	2.46057	2.18096	4.00111	4.55703	3.36443	3.16273	2.9147	3.45713	2.88675	3.62169	3.62169	3.62169	2.70453	5.84609	2.87892	3.45171	3.39592	3.58875	3.88999	3.5032	3.02153	2.41242	2.40963	4.14286	3.69224	1.85875	3.53853	3.09326	2.73864
RCAN3	3.51946e-07	-6.45352	3.60254e-05	0.835223	5.59262	5.05417	5.2736	4.77233	4.71526	3.93458	4.45847	5.05432	4.9318	3.84611	5.13297	4.0171	5.70971	4.62606	5.30822	5.20169	4.89165	5.16737	5.55418	5.8956	6.01364	6.15493	6.16591	5.04938	5.08217	5.7348	5.7348	5.7348	4.96164	6.6535	6.33289	5.18418	5.43151	5.63961	5.83446	5.77658	5.00789	4.37382	4.85243	5.88767	6.28724	3.73563	5.91799	5.69023	5.16077
MRPS18B	3.66105e-07	-6.43639	3.73145e-05	0.573961	3.67401	3.00048	3.53437	3.63593	2.91203	2.87879	2.63785	3.05238	3.57913	3.34273	3.13895	3.02757	3.50844	3.29738	3.02721	3.32384	2.8045	3.12522	4.10464	4.0945	3.89401	3.72233	4.14749	3.82828	3.34529	3.84327	3.84327	3.84327	3.2221	4.42771	3.76828	3.73285	3.91328	3.64087	4.11171	4.23155	3.22018	2.52108	3.18385	4.11875	3.61172	2.56171	3.92614	3.75143	3.03623
FBL	3.70832e-07	-6.43082	3.75058e-05	0.629346	4.08079	3.83361	3.62872	3.41448	2.8671	2.55153	3.31571	3.55888	4.33754	3.49899	3.26565	3.28507	3.71817	3.8861	3.88463	3.57947	3.39998	3.97182	4.63043	4.40005	4.39841	4.16258	3.97317	4.09228	3.94593	4.36681	4.36681	4.36681	3.84748	5.23175	4.21978	4.50029	3.91328	3.93222	4.18516	3.82999	4.01007	2.99298	3.75632	4.2617	4.5892	2.7687	4.12474	4.06553	3.81163
EPB41L4B	3.71127e-07	-6.43048	3.75058e-05	-2.02519	0.423711	-3.1008	-2.70843	0.531227	0.694281	3.03906	0.087415	-0.195447	-0.494391	1.56067	3.78611	3.83299	-0.639052	1.58301	1.1872	-2.04276	-1.37574	-2.58525	1.68059	-0.635145	0.50111	2.08592	-4.36345	0.8413	-0.580312	-1.3847	-1.3847	-1.3847	-1.00387	-3.49463	0.177802	1.13959	0.627969	1.68461	1.12631	-1.09246	-0.238277	2.02655	-1.41611	-4.36345	-0.87864	-1.18788	-1.46018	-0.832218	-0.427408
H3C7	3.74451e-07	-6.4266	3.76821e-05	1.25003	4.49608	3.65827	3.2317	4.28596	1.02399	2.98282	2.60545	3.58199	2.79429	3.40728	3.41895	2.71389	2.82034	4.24694	3.73169	3.78306	3.90053	3.25577	4.90739	5.34575	5.46882	3.3979	2.63133	4.85507	4.87259	4.52418	4.52418	4.52418	3.95606	6.26284	4.52125	5.33868	5.02145	4.80196	5.59575	3.28056	2.75738	3.64071	5.04186	4.3789	3.61659	3.95122	4.23137	3.69978	3.48141
BZW2	3.78184e-07	-6.4223	3.78979e-05	0.58959	3.54438	2.6086	3.20744	2.75535	2.68232	2.6084	2.53836	3.06337	3.82894	3.08108	2.85975	2.56982	2.96694	3.8363	3.44905	3.01294	2.81834	3.65777	3.77497	3.98612	3.65956	3.65983	3.92836	3.29578	3.39848	3.98203	3.98203	3.98203	3.26495	4.54893	3.78254	3.55327	3.57571	3.39227	3.76924	3.78041	2.84021	2.57249	3.39026	3.56853	3.69224	2.00623	3.67815	3.26301	3.55719
IGHV5-51	3.85792e-07	-6.41365	3.84985e-05	2.28955	4.38862	3.10677	3.90496	3.95457	-1.10769	1.16894	1.69086	-0.55008	2.77119	2.51984	3.62997	1.13505	0.783518	0.156589	0.904521	0.278916	1.80061	4.08653	5.87141	5.67414	4.85268	1.74822	1.50289	5.07899	3.74497	4.06122	4.06122	4.06122	3.04658	1.63178	2.27201	6.16889	2.95088	4.22001	3.37744	3.24445	0.318861	3.3081	4.44978	3.57499	1.83064	4.85802	3.52379	3.27482	5.78503
TRAV19	3.93663e-07	-6.40488	3.90873e-05	1.31362	0.871189	-0.328437	-0.459418	-4.36345	-0.970871	-1.46255	-0.434665	1.22183	0.131732	-1.1368	-0.942624	-0.184523	-0.133002	0.235554	0.0861709	-0.664443	0.0825738	-0.518974	1.2459	0.83889	0.768106	0.864406	1.55098	0.963568	0.968648	1.57713	1.57713	1.57713	-0.849646	2.13202	1.75981	-0.923083	0.673811	0.270266	1.12631	0.73989	-0.539683	-1.6161	-0.512803	0.741475	1.23877	-2.03644	1.81234	0.667059	-0.106352
AKR1B1	3.9497e-07	-6.40344	3.90873e-05	0.601557	3.97013	3.33773	3.6648	3.58087	3.14066	3.15812	2.74091	3.22871	4.41784	3.67315	3.01213	3.34532	3.59473	3.72439	3.30861	3.47421	3.33406	3.41593	4.79115	4.40318	4.20659	3.98703	4.42736	4.0878	3.77545	4.25053	4.25053	4.25053	3.40945	4.66532	4.3144	4.07437	3.98776	3.94503	4.58368	3.78041	3.7692	2.95475	3.65858	4.2597	4.34151	2.98568	4.19772	4.19241	3.54005
NEAT1	3.96835e-07	-6.40139	3.91095e-05	-0.861743	11.2975	11.5745	12.235	12.3801	11.7067	11.7397	12.769	11.9598	10.8392	12.0605	11.0549	11.747	11.8314	10.9025	12.7969	11.9573	11.7446	11.2378	10.2624	10.9123	10.0492	9.60735	10.2439	10.2612	11.2819	9.98677	9.98677	9.98677	11.3631	11.1151	11.2073	11.9992	11.2101	10.5536	10.2914	10.4099	11.8028	10.7537	11.6698	11.6368	11.864	12.4151	10.4747	10.7662	10.6871
KLF12	3.99334e-07	-6.39866	3.9191e-05	0.806317	6.50391	5.51732	6.3851	4.79185	5.32281	5.35415	4.98474	6.02824	6.16253	6.09233	6.03745	5.90631	6.44077	5.22829	5.69237	6.30122	5.76921	5.66539	7.12835	6.61062	6.21636	6.02665	6.91287	6.61439	5.93465	6.76699	6.76699	6.76699	5.77583	7.31424	7.16299	5.73106	7.21657	6.7899	6.9087	7.18488	6.7401	5.38895	5.3804	7.15939	6.75631	4.58442	7.28891	7.1358	6.21303
CCR4	4.02405e-07	-6.39534	3.9191e-05	0.80494	4.58049	4.08546	4.52153	3.01	3.63458	3.3482	3.32237	2.93761	4.13525	3.35096	4.00778	3.11091	4.52915	4.69405	3.52718	3.98521	4.50334	3.60975	4.59531	4.32951	4.05563	3.83504	4.55369	4.42939	4.57051	5.1779	5.1779	5.1779	3.66756	5.83396	5.32242	4.72369	4.1425	4.24353	5.29001	5.26841	4.03841	4.02594	3.97727	5.6307	5.07415	3.60288	4.34749	4.32048	4.07621
H2BC13	4.02591e-07	-6.39514	3.9191e-05	1.20799	2.6533	2.15947	1.49343	2.44591	0.320525	0.469077	1.08572	1.53774	1.13602	1.56067	1.85601	1.66274	1.06973	2.35842	1.65765	1.59696	1.85535	1.79581	3.09871	3.70636	2.3662	1.882	1.01268	2.87535	3.18802	2.53791	2.53791	2.53791	2.56062	4.56125	2.88774	3.48293	2.99669	2.43116	3.48713	1.58075	1.14167	2.18908	2.9075	2.53522	1.84728	2.0294	2.3013	1.17555	1.87289
TRBV4-2	4.07292e-07	-6.39009	3.92762e-05	1.68223	0.83941	-0.457167	1.29286	-2.81923	-0.345257	-0.943459	-0.733103	-0.195447	-1.39889	-2.16708	-0.766917	-4.36345	0.240899	-1.03638	-1.37244	-0.995618	-1.14334	0.297605	1.2459	1.52991	1.53103	0.533599	1.81002	-0.793886	0.968648	1.50342	1.50342	1.50342	-0.710329	1.85628	2.62835	0.171054	1.19773	1.04061	0.891129	1.36225	-0.921153	-0.90389	-0.172629	1.73196	1.61431	-3.13743	1.38232	1.29639	0.927483
CCDC17	4.10595e-07	-6.38659	3.92762e-05	-0.589499	4.23446	4.86183	4.74021	4.56665	4.61011	5.02571	5.34191	4.80541	3.77769	4.88392	4.76581	4.60679	4.48811	3.81717	4.64588	4.75998	4.37341	4.95593	3.72385	4.16249	3.76255	3.33929	3.99071	3.92677	4.01992	3.65186	3.65186	3.65186	4.086	3.31648	3.4607	3.78807	3.71925	3.77248	3.08119	3.44869	4.47675	4.33961	4.46812	3.7677	3.99079	5.31473	3.7891	3.86911	4.43874
INPP4B	4.11171e-07	-6.38598	3.92762e-05	0.96447	5.66659	5.22649	5.26187	3.5696	4.38955	3.22025	4.16057	5.41978	4.93441	4.27586	5.25764	3.43122	5.71268	4.14323	5.5726	5.19151	4.93359	4.85361	5.89037	6.03108	5.18628	5.95471	5.57999	5.19587	4.89127	6.17025	6.17025	6.17025	4.41759	6.48919	6.55332	5.35986	6.08224	5.70132	5.79661	6.27759	5.6252	4.73885	4.77598	5.94737	5.45014	3.83105	5.94958	6.35866	4.86754
LDLRAP1	4.1162e-07	-6.3855	3.92762e-05	0.636594	6.17967	6.33165	6.16239	5.19163	5.25118	4.82039	5.82027	5.5249	5.75189	5.64078	5.26777	5.10191	5.98388	5.33076	5.29588	5.99511	5.99014	5.65866	6.53038	6.48497	6.41793	6.47685	6.56615	6.00982	6.17271	6.1432	6.1432	6.1432	5.91281	6.22927	6.76138	6.17687	5.69316	6.03744	6.81241	5.87139	5.51606	4.88834	5.58749	6.44848	6.44661	5.37251	6.42175	6.16356	6.13813
AMIGO1	4.12379e-07	-6.3847	3.92762e-05	0.881944	3.05783	2.24472	3.28676	2.08349	2.23601	1.31276	1.91896	2.28393	2.19135	2.44495	2.14688	1.86835	2.80928	2.4104	2.37322	2.38544	2.0081	2.16206	3.57316	3.1883	3.47589	3.28511	3.98634	2.73361	2.55318	3.02648	3.02648	3.02648	2.40074	3.6335	3.94346	2.37731	3.19835	3.17566	4.01978	2.56898	3.29256	2.41242	1.59952	3.15976	3.15079	1.40655	3.71753	3.50289	2.96952
ZNF550	4.13347e-07	-6.38369	3.92762e-05	0.671163	2.78989	1.75692	2.27848	1.98513	2.05553	1.56344	1.91896	2.40983	2.74771	1.88919	1.85601	2.18643	2.82034	2.63091	2.37322	2.43807	1.98374	2.34079	2.77381	2.79974	3.47122	3.3979	3.32049	2.69882	2.55318	2.84442	2.84442	2.84442	1.97472	3.13723	3.15943	2.24998	3.19835	2.95908	3.27105	3.61349	2.88772	2.2949	2.47154	2.68602	2.67918	1.40655	3.19225	3.50791	2.80709
LGALS8	4.30383e-07	-6.36614	4.07198e-05	-0.608632	7.27666	8.55275	7.34631	7.64144	7.64501	8.11537	6.68655	8.10926	6.54789	7.39859	8.13572	7.85408	7.27731	7.1765	7.60891	8.07751	8.12707	8.00689	7.42039	6.7237	6.55171	6.29774	7.49956	7.16606	7.14282	7.05352	7.05352	7.05352	7.10024	7.262	7.03883	6.79351	6.7538	6.64137	6.28684	7.15662	7.57419	6.964	7.44079	6.91598	6.5237	7.83796	6.68554	6.62525	7.80545
NINJ2-AS1	4.32362e-07	-6.36415	4.07198e-05	-0.599512	5.00763	5.83164	4.88743	5.6665	5.01003	6.2953	5.0363	4.42994	4.73091	5.79499	6.1635	5.41701	5.26355	5.06762	5.42394	5.40042	5.59521	4.91418	4.64768	5.16422	4.7771	4.32243	5.26204	4.9444	4.78293	4.44025	4.44025	4.44025	5.52044	3.84169	4.59041	5.20618	4.73021	4.96336	4.44103	4.36788	4.64747	4.92506	4.94698	4.89854	5.23299	5.43893	4.3079	4.39002	4.91706
CD28	4.33661e-07	-6.36285	4.07198e-05	1.09202	5.22587	4.61204	5.0117	3.5468	3.5855	2.78323	3.19021	4.78895	4.2315	3.12011	4.36938	2.31251	5.19507	4.43852	4.95944	4.72158	4.45984	3.87647	5.48679	5.47465	5.48049	5.33408	5.59583	5.0215	4.55009	5.37934	5.37934	5.37934	4.36341	6.88031	6.21432	4.63149	5.63641	5.18341	5.76211	5.92371	4.67029	3.71121	4.03581	5.80768	5.72804	2.49667	5.58812	5.18894	4.75074
IATPR	4.45554e-07	-6.3511	4.16724e-05	1.36106	0.207312	-2.43793	-0.0169542	-4.36345	-1.61904	-1.17978	-1.10982	-1.2202	0.0572788	-1.83296	-2.4473	-0.90633	-0.133002	0.235554	-2.44502	-1.4262	-0.943233	-1.31209	0.779412	-0.0522671	-0.133253	-0.0273549	-0.20918	0.14404	0.0710817	0.35012	0.35012	0.35012	-1.86975	1.03942	2.06986	0.118998	0.883425	0.310425	0.401656	1.1444	-0.921153	0.213034	-1.24704	0.718327	0.409366	-2.03644	0.799906	0.15603	-0.725963
HELLS	4.49126e-07	-6.34763	4.18424e-05	0.864211	3.67818	3.04868	2.9589	3.05917	2.05553	1.63817	2.49184	3.00756	3.20967	2.90227	2.51325	3.78304	3.48081	3.01354	3.23809	3.08071	2.35055	2.25419	3.46058	4.60397	3.77398	3.7121	3.36151	3.45713	3.30407	3.44594	3.44594	3.44594	3.11376	5.59493	3.50723	3.75007	4.01473	3.60095	3.90193	3.66903	3.13086	3.3081	3.85253	4.05088	3.706	2.82276	3.69139	3.76406	3.04435
TWNK	4.56498e-07	-6.34056	4.23638e-05	0.677504	2.26912	1.78566	1.96788	-0.51392	1.73381	1.00918	1.36921	2.01625	1.76981	1.72163	1.42043	1.78379	2.12609	2.3045	1.88568	1.82484	1.18351	2.3575	3.2599	2.26632	2.57218	3.10135	2.56262	1.77783	2.0537	2.37179	2.37179	2.37179	2.01544	2.814	2.27201	2.38835	2.53265	2.54494	2.52458	2.44717	1.76771	2.6383	1.43525	2.59363	2.5013	1.29622	2.61111	2.49903	1.83592
MERTK	4.61293e-07	-6.33602	4.25855e-05	-1.04659	3.54318	2.41989	3.11484	4.39213	4.41787	3.57437	2.94463	2.73256	2.81704	2.63213	6.29808	5.60124	3.59473	5.45352	4.24981	3.49091	2.46057	4.08653	3.66409	2.29352	3.17635	3.31245	4.15917	3.26441	2.9144	2.78344	2.78344	2.78344	3.64178	1.91887	2.72994	2.70318	2.77275	2.23647	2.59488	2.7473	4.45062	3.6	3.38383	2.96209	2.6415	1.21767	3.17349	2.47874	2.91738
LINC01184	4.62561e-07	-6.33483	4.25855e-05	0.761879	4.34541	4.02047	3.86933	2.87002	3.43968	2.73297	3.06074	3.6637	3.8177	3.77451	2.61196	4.59028	4.31901	3.74478	4.02889	3.62558	3.6293	3.47839	4.55932	4.50852	4.29911	4.27457	4.53588	4.323	3.36546	4.52651	4.52651	4.52651	3.50549	5.17838	4.44562	3.927	4.94873	4.4396	5.04837	4.97255	4.66121	3.26709	3.65325	4.69867	4.71696	2.80944	4.81104	4.66826	3.91717
STXBP4	4.64244e-07	-6.33325	4.25855e-05	0.625212	3.51637	2.84536	3.08852	2.44591	2.84873	2.71582	2.44377	3.0413	3.63779	2.94638	2.61196	3.27478	3.16219	3.00229	3.18551	3.44021	2.59531	2.5296	4.04342	3.4158	3.78907	3.55498	3.99071	3.60849	2.93255	3.75471	3.75471	3.75471	2.98641	3.7283	3.44883	3.12875	4.17075	3.53469	3.97906	4.00747	3.49019	3.39634	2.98596	3.55879	3.66433	2.28187	4.33347	4.27708	3.12319
UBE3D	4.7298e-07	-6.32516	4.32206e-05	0.645951	2.62282	1.92131	1.90893	1.9508	1.49482	1.80964	1.69086	1.97027	2.32429	2.31639	1.59148	2.78812	2.51458	2.35842	2.42856	2.17417	1.14008	2.06364	2.97301	2.90932	2.72125	2.79703	2.83925	2.53755	2.07018	2.69516	2.69516	2.69516	2.07444	3.23272	3.15943	2.3323	3.19049	2.92715	2.77869	2.61213	2.79108	2.27435	2.00318	2.57443	2.72493	1.25748	3.10914	3.0595	2.38902
H3C2	4.75781e-07	-6.32259	4.33106e-05	1.42612	5.36437	4.26453	3.68251	4.80633	1.37154	3.07985	3.61604	4.11834	3.87301	4.27153	4.53788	4.04159	3.035	4.98719	4.58629	4.44557	4.4286	4.06125	5.47717	6.47906	5.63778	4.03296	2.27835	5.44185	5.67522	5.38449	5.38449	5.38449	4.99001	7.20898	5.40921	6.63053	5.67214	5.4163	6.15926	3.79297	3.66398	3.98858	5.83482	5.17102	4.72373	4.84501	4.90879	3.90756	4.66111
SNU13	4.80564e-07	-6.31825	4.35797e-05	0.471328	4.66716	4.30479	4.71462	3.95457	3.83455	3.99979	3.7456	4.22985	4.78957	4.33513	4.00172	3.96685	4.39127	4.71831	4.20297	4.55287	4.15626	4.70482	5.16141	4.86652	4.76951	4.65171	5.00586	4.57717	4.61051	4.9849	4.9849	4.9849	4.51665	5.19586	4.89818	4.59384	4.76504	4.73898	5.24075	4.67647	4.44004	4.04426	4.30086	4.8541	4.68259	3.6485	4.76584	4.47952	4.40758
C1orf226	4.88023e-07	-6.31156	4.40884e-05	-1.17769	1.22932	-0.210259	1.84747	2.60891	1.44676	1.63817	0.318238	2.10402	-0.386529	1.44245	2.88629	3.60556	0.783518	1.55249	2.31567	2.11075	2.81834	0.608083	0.310227	0.309375	1.11809	1.22252	2.20511	0.8413	0.518222	0.686212	0.686212	0.686212	0.231162	1.55503	1.4855	0.913783	-0.0790735	-0.20822	0.309095	0.632212	1.14167	1.63346	1.48412	-0.433465	-0.263951	1.44153	-0.559975	-0.064397	1.15464
AC020895.1	4.92227e-07	-6.30783	4.43004e-05	-1.28827	0.871986	3.8541	0.057311	1.84261	0.150949	-0.131596	-1.62107	2.3026	-1.62542	0.930122	2.03272	2.31251	0.953944	0.449417	3.13095	0.895566	1.09531	0.226603	0.442582	0.508265	-0.599443	-0.0273549	-1.37795	0.560461	0.698691	0.020894	0.020894	0.020894	0.748564	-0.0413868	-0.143019	0.786078	-0.157187	0.862985	-1.40754	0.321545	0.975706	0.718075	1.0039	-1.55085	-0.263951	0.500661	-2.27918	-0.255079	0.962208
PMM2	4.99172e-07	-6.30175	4.47566e-05	0.553011	4.39775	3.97129	3.74564	3.78953	3.21427	3.50618	3.44343	4.06465	4.1754	4.23643	3.8071	3.97323	4.48811	4.2892	4.19235	4.08759	3.39075	4.15505	4.6339	4.75106	4.61293	4.08145	4.38819	4.22044	3.76536	4.41031	4.41031	4.41031	3.96648	4.8948	4.72937	4.01508	4.47257	4.19609	4.54107	4.87258	4.05931	3.93065	4.05211	4.4045	4.61129	2.97378	4.67096	4.31477	4.22661
CSF3R	5.07597e-07	-6.29448	4.52949e-05	-0.840735	12.2304	13.2901	11.992	12.9073	13.0329	13.5288	13.2862	13.127	11.8158	12.6589	13.35	12.8141	12.2997	11.6349	12.5451	12.8309	13.0305	13.2966	12.3547	11.738	11.0993	9.21872	12.0262	12.0003	12.6303	11.4374	11.4374	11.4374	12.5705	10.7388	11.8514	12.0911	11.3952	11.8975	10.8583	11.4463	12.6671	12.4199	12.3908	10.6913	11.6357	13.0746	11.2306	11.1789	12.9294
B3GNT5	5.11818e-07	-6.29088	4.52949e-05	-0.971103	4.97815	5.75198	4.47826	4.89025	5.68444	7.36185	5.31042	5.86979	4.10323	4.34752	6.28318	5.21656	5.4514	5.27109	5.92823	5.51101	5.98248	6.17821	4.67485	4.67552	3.19913	2.92656	4.86317	4.68182	5.07402	4.13934	4.13934	4.13934	5.39488	3.61944	4.90689	4.68841	4.44309	4.19877	3.75176	4.34674	6.22904	5.18936	5.00256	3.44354	3.91386	5.95237	4.29059	3.60469	5.33649
EFEMP2	5.1373e-07	-6.28926	4.52949e-05	-0.696173	2.24023	3.25795	2.9589	3.60315	2.51764	1.67413	2.95324	2.61796	1.90332	2.7857	2.19013	3.48577	2.01492	2.82214	2.66197	2.42074	2.56278	2.32388	1.9489	1.80032	1.94898	2.55522	1.32073	1.84301	2.61066	1.57713	1.57713	1.57713	1.88966	1.51507	2.20302	1.91046	1.4022	1.65373	2.09639	2.06775	2.47584	2.76155	1.55446	1.78863	1.88001	3.1213	1.48731	1.7331	2.42681
HAUS4	5.1387e-07	-6.28915	4.52949e-05	-0.872168	4.94065	6.10391	4.65308	5.4984	5.41311	6.61734	5.70646	5.60418	4.25667	5.43558	5.87963	5.81339	5.26355	4.21806	5.65998	5.78263	5.53151	5.67875	3.70421	5.07492	4.23993	2.93538	3.90542	4.74854	4.97463	4.46716	4.46716	4.46716	5.16987	3.88152	4.59849	4.89211	4.43646	4.77351	3.38879	4.33391	5.12815	5.43366	5.48916	3.39327	3.79877	6.04768	4.3419	4.35428	5.64511
KCNE1	5.14671e-07	-6.28847	4.52949e-05	-1.14555	5.2087	4.86856	4.54753	6.26591	6.41853	6.88141	6.53491	5.63398	4.50795	6.24803	6.8183	6.96292	4.57886	6.30264	5.73689	5.59065	4.9431	6.60734	4.18715	3.92219	4.33298	3.83975	4.97314	3.53808	5.86196	4.78942	4.78942	4.78942	4.94856	3.04202	3.86524	5.2124	3.90369	4.62816	3.25253	3.5184	4.84894	5.17834	5.48015	3.87626	3.5316	6.9048	4.11821	3.64622	5.70656
ZFP92	5.17256e-07	-6.28629	4.5355e-05	-0.581515	1.92874	1.75692	1.59665	3.15276	2.82072	2.78323	2.27545	1.79674	1.98592	2.49035	2.77707	1.81253	1.97587	2.55596	2.25573	2.08897	2.42482	1.69421	1.90368	1.33419	1.74738	1.41141	2.09589	1.50999	2.1343	1.40565	1.40565	1.40565	2.03538	1.75698	1.31289	1.35743	1.4022	1.43504	1.50576	1.49112	2.55645	2.05092	2.22068	2.01447	2.21104	1.50904	1.67683	2.15995	1.85452
IGHV3-53	5.19334e-07	-6.28455	4.53704e-05	2.18949	0.219516	-2.43793	0.057311	-1.60869	-2.82721	-2.97541	-1.42981	-2.06551	-1.39889	-0.808887	-0.942624	-1.96341	-2.67576	-1.73975	-2.44502	-2.04276	-4.36345	0.0731682	0.310227	1.01266	0.640775	-1.41502	-2.37587	0.275766	0.255363	-1.01616	-1.01616	-1.01616	-0.258045	-1.43568	-2.44298	2.16269	-0.627484	-0.326409	-0.999732	-1.51931	-2.26246	-0.90389	0.102442	-0.783857	0.0554431	-0.16105	-0.835885	-0.1252	0.817993
CD63	5.26582e-07	-6.27853	4.58357e-05	-0.703407	6.05767	6.93888	5.83307	6.6485	6.30856	6.99329	6.02302	6.03941	5.51687	7.02718	7.41849	7.51091	5.50037	6.44027	6.46011	6.20707	6.56912	6.99486	6.20305	6.03411	5.27338	5.24642	5.73373	5.64282	6.26511	5.95815	5.95815	5.95815	6.38339	5.37258	5.79639	6.12914	5.08645	5.85686	5.22974	4.93339	6.11888	5.47252	5.92387	5.54448	5.16491	6.58614	5.37342	5.32015	6.70972
GNL3	5.2862e-07	-6.27686	4.58457e-05	0.704468	3.57185	2.80382	3.48813	2.44591	2.48233	2.55153	1.84686	3.19912	2.80571	2.71096	3.80014	3.03977	3.06321	2.93291	3.72434	2.81492	2.74776	3.291	3.56592	4.22388	4.28853	3.67571	3.63684	3.36398	3.25444	3.93374	3.93374	3.93374	3.16895	4.38123	3.68472	3.67994	3.31866	3.76166	3.40566	3.84213	2.91855	2.58922	3.26999	4.04391	3.38541	2.52956	3.66925	3.47756	3.01984
MAK16	5.33685e-07	-6.27272	4.61173e-05	0.590722	3.05154	2.3055	2.88944	2.01867	2.61869	2.04757	1.84686	2.20673	3.05564	2.17525	2.53018	2.44689	3.06321	2.77003	3.03911	2.67576	2.42482	2.70961	3.23273	3.32642	3.35938	3.33929	3.37493	2.8857	2.56486	3.48954	3.48954	3.48954	2.14954	3.82135	3.27822	2.89338	3.5452	2.86783	3.3193	3.52594	2.3683	2.55555	2.45937	3.46803	3.068	2.00623	3.34535	3.17118	2.42681
KPNA2	5.391e-07	-6.26833	4.64171e-05	0.745215	3.87002	3.24767	3.30973	2.75535	2.74327	2.8633	2.468	3.07428	3.63779	3.29235	3.38212	2.77358	3.08172	4.07509	3.76073	3.49091	3.02346	3.51609	4.49599	4.65468	4.1667	3.97852	3.74415	3.65763	3.98122	4.20766	4.20766	4.20766	3.66756	5.46986	3.58521	4.00436	3.67485	3.82887	3.96775	3.43273	2.94873	3.47949	4.13479	4.24358	3.50562	3.27465	3.63766	3.57633	3.45726
KNOP1	5.48543e-07	-6.26079	4.70603e-05	0.568254	3.28321	2.96323	3.07963	2.54129	2.34489	2.40941	2.6485	2.82587	2.87237	3.03075	2.53018	2.61946	3.14469	3.111	3.05092	2.90491	2.49545	3.14461	3.17681	3.44642	3.70801	3.64914	3.4274	3.21602	2.78056	3.42113	3.42113	3.42113	2.58788	3.97286	3.67456	3.1931	3.75167	3.27032	3.79079	3.78041	3.18258	3.18138	2.82454	3.61627	3.25426	1.9096	3.61003	3.50791	3.01984
AC138207.4	5.64232e-07	-6.24854	4.81265e-05	-0.459014	4.23522	4.44647	4.29856	4.54954	4.67411	4.92856	4.59678	4.34241	4.42526	4.63378	4.76938	4.61904	4.48464	4.06971	4.62629	5.10735	4.4286	4.45208	3.71733	3.96512	4.00482	3.38508	3.91004	3.96631	3.97248	4.13934	4.13934	4.13934	3.8919	3.75428	4.03761	3.7713	3.94166	4.17993	3.6231	4.31227	4.31818	4.03207	4.39012	3.87626	4.1401	4.84827	3.60069	3.68215	4.42636
URB2	5.65007e-07	-6.24795	4.81265e-05	0.577297	3.31212	2.6086	3.19926	1.80466	2.51764	2.01988	2.70057	2.83872	3.07464	2.7857	3.05955	2.63564	3.15347	3.38659	3.13095	2.92963	2.54624	3.15421	3.38855	3.74629	3.45238	3.71722	3.44022	3.16596	2.97694	3.44101	3.44101	3.44101	2.60131	4.41962	3.49574	3.14836	3.52032	3.33502	3.38313	3.32447	3.1043	2.98035	3.08434	3.77052	3.32727	2.16115	3.77258	3.70852	2.80709
NCOA7	5.73471e-07	-6.24149	4.86736e-05	-0.802712	6.29363	6.88098	7.26784	6.00655	6.56288	6.24389	4.8506	7.69739	5.22326	5.70958	6.35738	7.25036	6.65058	7.21232	6.51228	8.10659	7.75121	7.18183	6.68286	5.57923	5.81322	5.77841	7.10982	5.71713	5.49465	6.25971	6.25971	6.25971	5.64245	6.55348	6.11266	5.11444	5.99464	5.66403	5.32441	6.9542	5.65297	5.62436	6.02126	6.14368	5.34418	7.17477	6.25631	5.4894	6.03893
TOMM70	5.77964e-07	-6.2381	4.8881e-05	0.534871	4.30826	3.65827	4.46468	3.46401	3.60752	3.50618	2.9618	3.69231	4.2315	3.89757	4.06698	3.57234	4.17129	4.08045	3.87138	4.11478	3.79947	4.1928	4.36866	4.6935	4.62559	4.68086	4.74153	4.24476	4.01567	4.85015	4.85015	4.85015	3.83616	5.04618	4.25428	3.83722	4.20628	4.24613	4.12873	4.72969	4.07307	3.47949	4.0802	4.83405	4.33267	3.20511	4.66649	4.41426	4.15337
TCF3P1	5.8761e-07	-6.23091	4.95212e-05	-0.646056	4.12417	5.6226	4.72605	4.09481	4.42719	4.78383	4.03236	4.89426	3.37205	4.28877	4.06117	4.7732	3.85895	4.67646	4.72905	4.85013	5.02894	5.22087	4.21055	3.71645	3.42848	3.4357	3.52693	3.65158	4.07405	3.59088	3.59088	3.59088	4.36341	4.16909	3.85178	4.14114	3.9228	3.59283	3.83296	3.84213	4.05237	4.10953	4.08812	3.74211	3.46845	5.17102	3.44256	3.21476	4.53415
RN7SL587P	5.91765e-07	-6.22785	4.96337e-05	-0.953207	2.28183	2.68684	2.55969	1.76569	2.9979	2.51233	2.54976	3.48723	1.8157	2.24755	2.96311	3.41257	2.70569	3.12144	3.05092	4.27283	3.13828	4.13096	2.23104	1.16774	0.386704	0.708464	2.66449	1.5365	1.33887	1.30077	1.30077	1.30077	1.16525	2.52305	1.66038	1.4656	1.92243	1.17719	0.530233	1.55149	2.41228	1.22594	2.33166	2.07949	1.26378	3.49878	1.40394	1.94017	1.85452
KLF14	5.93107e-07	-6.22687	4.96337e-05	-2.09998	0.828229	0.268194	-2.70843	2.14552	0.423425	2.12756	0.691974	-0.195447	-0.286173	0.468006	4.50401	4.72866	-0.765681	0.948509	0.851513	-0.995618	-0.0122418	0.226603	-3.20893	-0.741579	0.262438	0.971211	-4.36345	-0.250008	0.418749	-3.02456	-3.02456	-3.02456	0.886667	-2.56498	0.487285	0.570443	-0.327376	-0.0473203	-0.780448	-1.51931	0.492807	2.12166	0.163731	-2.9611	-1.97168	-0.16105	-2.27918	-1.809	0.214878
RRM2	6.04127e-07	-6.21887	5.03791e-05	1.25336	4.59312	3.7486	3.0617	4.41119	2.26401	2.6451	3.04471	3.19912	3.25201	3.86921	3.91416	2.97768	3.17086	3.98083	3.80323	4.00278	3.39075	3.15421	4.54466	6.04615	4.99127	4.24294	1.68631	4.87857	4.76278	4.83896	4.83896	4.83896	3.90279	6.5912	4.48683	5.28063	4.09695	4.97434	4.92709	3.22605	2.91855	4.17751	5.29567	4.65667	3.683	4.31413	4.34749	4.03112	4.17943
KCNE1B	6.22811e-07	-6.20564	5.17563e-05	-1.40877	2.02764	0.913901	0.380244	4.85355	3.07105	3.42408	3.50914	1.33499	1.0618	2.64557	4.18926	3.96044	2.65715	1.8572	2.27599	2.4032	-0.610927	1.82013	1.13288	1.07671	1.09398	1.68686	2.26399	1.84301	1.98581	-0.270874	-0.270874	-0.270874	2.09359	0.725995	1.08646	1.83179	-0.239773	0.460736	0.210186	0.88769	2.49641	3.06654	3.50719	0.188596	0.799793	3.63345	-0.00987264	-1.17377	1.27001
ARHGAP26-IT1	6.30941e-07	-6.20001	5.22498e-05	-0.715214	3.09381	4.3245	3.16608	3.5468	4.03066	3.91216	3.63221	3.0413	3.32523	3.78061	3.73592	3.39367	3.30293	3.32473	3.32815	3.55585	3.88088	3.74927	2.97301	2.95264	1.41907	0.936481	3.01239	2.58912	3.21792	2.58334	2.58334	2.58334	3.49112	2.5919	2.27201	2.64915	2.21375	2.22601	2.03991	2.53948	3.67304	3.13654	3.35784	1.39501	2.59298	3.95727	2.60179	2.37279	3.5515
LINC00968	6.34785e-07	-6.19737	5.23862e-05	-0.782812	2.31923	1.94697	3.11484	2.01867	3.39606	3.3482	2.50361	3.939	2.32429	2.17525	3.08268	2.91281	2.14382	3.31567	2.96618	2.43807	2.77641	3.13495	2.09686	1.61864	2.04011	2.35937	2.66449	1.56253	1.67694	3.07181	3.07181	3.07181	2.01544	1.87218	1.85282	1.79908	1.13357	1.54011	0.953616	2.02582	1.95778	1.97654	2.35812	2.2262	1.16102	1.93437	1.89099	1.68078	2.9949
H1-5	6.40897e-07	-6.19321	5.25916e-05	1.38495	5.72485	4.50811	4.1789	5.20626	2.2218	3.54554	4.19001	4.33789	4.11704	4.96389	4.82189	4.44183	3.48081	5.29894	5.11653	4.6453	4.88837	3.74292	5.38146	6.75523	6.25288	4.62742	3.27826	5.90435	5.90395	5.84707	5.84707	5.84707	5.508	7.40757	5.74877	6.86834	6.12515	6.09964	6.55591	4.31227	4.09348	4.36412	6.48538	5.56572	4.79839	5.12334	5.40593	4.19553	5.0298
PAICS	6.43453e-07	-6.19148	5.25916e-05	0.728873	4.5027	4.13654	4.00686	3.90163	3.07895	2.96841	3.32237	3.98597	4.20156	3.49899	4.21042	3.57234	3.83187	4.53923	4.43236	3.99109	3.60555	3.89948	4.29615	5.46422	4.72312	4.71456	4.09169	4.34566	4.30052	4.54269	4.54269	4.54269	3.66116	6.09764	4.88283	4.87848	4.52978	4.77171	4.82424	4.07071	3.37267	3.77843	4.60699	4.84076	4.23486	3.9329	4.43933	4.23234	4.01964
MEF2A	6.43889e-07	-6.19119	5.25916e-05	-0.77838	7.42729	8.18934	7.1776	8.12792	8.0302	8.89603	7.48641	8.14461	6.69095	7.44449	8.87445	8.61331	7.40636	6.9183	7.87313	7.76632	8.32338	8.23627	7.23431	7.0204	6.50677	6.35557	7.32215	7.05182	7.20572	6.98746	6.98746	6.98746	7.66078	6.96246	7.06676	7.00503	6.51024	6.94503	6.16752	7.07864	8.00149	7.56685	7.73546	6.62261	6.34258	8.47757	6.74973	6.37178	7.92744
MIR4451	6.46991e-07	-6.1891	5.26647e-05	-1.12072	0.266749	0.268194	-0.566887	1.24866	1.14938	1.63817	0.919916	-0.421936	0.334486	-1.1368	0.736261	3.25398	-0.133002	-0.0156235	1.65765	0.0273895	0.0825738	0.954133	-0.634326	-0.122448	-1.05836	-0.610885	-0.571485	-1.67722	-0.140234	-1.3847	-1.3847	-1.3847	0.298705	-1.60149	-0.556212	-1.15978	0.196909	-1.02581	-0.590139	-0.623432	1.08844	-0.181987	1.1321	-0.598049	0.617747	0.627592	0.15219	-1.4567	0.0948263
LINC02471	6.60009e-07	-6.18045	5.34772e-05	-1.06785	1.00873	3.30833	0.866819	-0.029688	0.990861	1.77693	0.469953	1.89844	0.512225	-0.215989	1.4563	0.775092	2.75265	2.65983	0.413241	2.53789	1.74372	2.18096	0.310227	0.723601	-0.0237012	1.27906	0.264492	-0.000932473	-0.218159	0.652509	0.652509	0.652509	-0.0759148	1.57461	-1.13749	0.944018	1.13357	0.564009	0.047814	0.840086	0.121029	1.13767	0.935258	0.286276	0.111636	2.57752	-0.0682082	-0.188679	0.325702
MRPL37	6.61458e-07	-6.1795	5.34772e-05	0.544847	3.82197	3.95241	3.56014	2.81382	3.33797	2.73297	2.75082	3.29548	3.76605	3.43076	2.92521	2.92602	3.42392	3.66857	3.64089	3.55585	3.38146	3.4318	4.21518	4.13267	3.95551	3.96566	3.68612	4.02834	3.84895	3.76658	3.76658	3.76658	3.94556	4.69245	3.93072	4.07095	3.78338	3.62503	4.3626	3.81776	3.35023	3.20329	3.56513	4.14068	3.57222	3.02079	4.01312	3.7172	3.46938
AC020703.1	6.65688e-07	-6.17673	5.36374e-05	-1.03229	3.70112	4.23879	3.50149	3.94588	4.97658	4.89848	5.44013	4.08097	3.50404	4.16356	3.88155	5.30011	3.37973	4.42595	4.55348	4.91963	3.65267	5.48131	3.83039	3.5628	1.60112	1.25107	3.64794	3.17442	2.54141	2.50995	2.50995	2.50995	4.14683	1.70465	2.68004	2.96884	2.82448	3.7471	1.78887	2.82272	3.5406	3.57501	4.01517	1.86439	1.38274	4.49151	2.58296	2.39461	3.92599
NAIPP3	6.79813e-07	-6.16761	5.45911e-05	-0.966611	4.20682	5.10351	3.83279	4.37281	4.96809	6.30824	4.73052	4.83136	2.95671	4.99046	5.53218	5.74048	4.80176	3.89829	4.3149	4.49609	4.46425	4.88853	3.63672	4.14765	3.36946	1.90014	3.39483	4.05609	3.89131	3.05255	3.05255	3.05255	3.80746	3.91645	4.02567	3.72417	3.14239	3.69496	1.77163	3.81776	5.40616	4.60536	4.68484	3.49211	2.36923	5.14207	3.80137	3.4673	5.02571
DTL	6.96835e-07	-6.15687	5.56402e-05	1.10067	2.93132	2.13735	2.3092	1.76569	0.609523	1.35768	1.95371	2.20673	1.64826	2.09914	2.14688	1.89546	1.61838	2.8475	2.03578	2.38544	1.71441	1.97977	3.28656	4.07895	2.81271	3.07764	1.01268	2.61423	3.13416	2.95915	2.95915	2.95915	2.51875	5.1927	2.84309	3.52854	2.37507	3.02693	3.14283	2.06775	0.719782	2.35486	3.36438	3.68654	2.55295	2.62394	2.44378	2.29371	2.25541
MTND1P11	6.97544e-07	-6.15643	5.56402e-05	-0.676462	5.48148	7.01593	5.44419	5.18056	6.05474	6.6208	5.37112	6.08597	4.80956	5.73653	6.05948	6.0123	5.48655	6.08535	6.1516	6.06231	6.12156	6.19225	5.09004	5.18797	4.45392	4.15504	5.09167	4.81502	4.95034	5.25992	5.25992	5.25992	5.77583	5.55238	5.28285	4.86866	5.28597	5.25846	4.23947	5.45576	5.90849	5.36728	5.80628	4.54434	4.43807	6.65109	4.89359	4.70147	5.84324
DYRK2	7.05393e-07	-6.15157	5.59695e-05	0.709996	6.18661	5.33738	5.83175	4.63852	5.24065	5.19308	5.02	5.86352	6.22445	5.58083	5.56951	5.3077	6.0894	5.53383	5.93302	5.8586	5.42923	5.45631	6.53409	6.16232	6.39221	5.99219	6.6589	6.1387	5.59774	6.5137	6.5137	6.5137	5.52749	6.99914	6.65368	5.56833	6.63208	6.15169	6.59503	6.70464	6.4548	4.93164	5.17805	6.60181	6.70643	4.2316	6.77588	6.67067	5.73946
TRBV29-1	7.06365e-07	-6.15097	5.59695e-05	1.31645	1.48831	0.805843	0.057311	-0.719728	0.266184	-0.261442	0.0234387	0.465529	0.512225	-1.1368	0.676689	-1.96341	0.737569	0.635631	1.1872	0.557881	0.951975	-0.518974	2.41953	0.412245	1.63493	1.10233	1.23502	0.798128	0.366316	1.42574	1.42574	1.42574	1.59949	2.51294	2.74942	2.2976	2.24445	1.74447	2.72596	1.8447	1.24257	0.451383	-0.250452	1.54727	1.51363	-0.988481	1.54683	2.45816	0.817993
TRIM32	7.24647e-07	-6.13987	5.71961e-05	0.636771	2.74352	2.06887	2.24709	1.72564	1.97312	2.12756	1.84686	2.35721	2.82827	1.95544	1.90875	2.14183	2.70569	2.5405	1.88568	2.21496	2.27226	2.21804	3.56592	2.76128	3.25455	2.81626	3.02946	3.30352	2.35217	2.93131	2.93131	2.93131	2.22092	3.20787	3.09995	2.2976	2.86456	3.05083	3.03858	3.10035	2.53671	1.92473	1.96925	3.11172	3.08213	1.21767	3.21689	3.32682	2.19829
HIF1A	7.26642e-07	-6.13868	5.71961e-05	-0.737963	8.30397	9.31342	8.26566	9.1509	9.5378	9.26866	7.78025	9.1722	7.35553	8.52423	9.17043	8.48612	8.47362	8.61788	9.05727	9.02207	8.90452	8.8541	8.81934	8.03482	7.5203	6.74176	8.5379	8.44897	8.53953	7.72927	7.72927	7.72927	8.10088	7.83482	7.98331	7.64088	7.11065	7.91188	6.86161	7.67535	8.52227	8.50626	8.51064	7.21936	7.19833	9.48914	7.71523	7.52177	8.93987
PHACTR2	7.35398e-07	-6.13348	5.76213e-05	-0.702191	6.64931	6.4917	6.96677	6.74933	7.19495	7.81521	5.09584	7.81667	5.73258	6.49726	7.88492	7.29241	6.72899	7.22689	7.45083	7.99502	7.10279	7.57964	6.8934	5.79805	5.85863	6.20776	7.23008	6.16973	5.99526	6.44707	6.44707	6.44707	5.71223	7.10808	6.63088	5.01291	6.34474	5.93841	5.9083	6.74397	6.39167	6.40476	6.74365	6.47116	6.17634	7.05211	6.20874	5.98898	6.76363
TCF19	7.36876e-07	-6.13261	5.76213e-05	0.923449	3.04418	2.4381	2.53391	2.79459	1.05637	0.891907	1.58403	2.0387	2.06405	2.49035	2.25267	1.99911	2.71758	2.63091	2.29597	2.73304	2.27226	1.7459	3.58753	3.96512	3.5036	2.97869	1.74949	3.05113	3.1263	2.70341	2.70341	2.70341	2.99661	4.25044	2.90522	3.35938	3.25223	3.4741	3.7779	2.27886	2.04418	2.21088	3.34467	3.31055	2.14526	2.35708	3.09592	2.98235	2.60218
CD3G	7.4647e-07	-6.12699	5.81807e-05	0.994747	5.84394	4.64769	5.81043	3.88354	3.90292	3.68426	4.27145	6.0198	5.28573	5.34374	4.63889	3.9859	5.72156	4.06431	5.10808	5.43752	5.23649	4.57508	6.54517	5.68574	5.97704	6.00481	6.51252	5.7387	5.10234	6.38941	6.38941	6.38941	4.90316	7.32728	6.48739	5.33298	6.41138	5.93761	6.37081	6.34202	6.19796	4.01978	4.27332	6.62611	5.94461	3.27465	6.47889	6.53296	5.02365
PARM1	7.50829e-07	-6.12446	5.83299e-05	1.4221	2.30659	1.39613	2.11423	2.08349	0.209717	1.11763	0.60722	-0.690726	1.0232	1.34695	1.68515	0.520225	1.30845	1.31861	0.61755	-0.523591	-0.222901	1.55624	3.04766	4.0027	2.58087	1.5784	0.905799	2.81166	2.41804	2.29742	2.29742	2.29742	2.53284	0.414621	2.25848	3.10218	2.6747	3.55989	2.82121	2.5245	-2.26246	1.09143	2.82454	1.93637	2.51178	1.50904	2.00855	1.47086	1.83592
WDR43	7.5846e-07	-6.12007	5.85707e-05	0.563746	4.45537	3.92038	4.29856	3.59205	3.82518	3.54554	3.39369	3.69937	4.45457	3.99529	4.20516	3.79028	4.39868	4.27057	4.30999	3.96741	3.54023	4.56071	4.52614	4.79931	4.91248	4.61923	4.86079	4.53834	3.95926	4.79522	4.79522	4.79522	3.91361	5.30095	4.52973	4.05719	4.34379	4.28443	4.37121	4.90765	3.77763	3.46142	4.10385	4.67482	4.58424	3.21525	4.79681	4.50983	3.94781
ANKRD34B	7.58841e-07	-6.11985	5.85707e-05	-1.75564	3.74714	3.98374	2.33928	4.16388	2.84873	3.75313	1.80942	3.14841	-1.20314	4.86394	6.53771	7.89497	1.45762	1.58301	4.70311	3.44021	3.48054	2.94897	3.94083	3.05951	2.33568	1.64445	3.28539	3.75115	1.83962	-1.69591	-1.69591	-1.69591	4.49162	1.93411	2.94801	1.84787	-0.869024	2.01134	1.54688	2.46298	2.93371	3.80733	3.61536	1.93637	2.19812	2.87488	-2.97372	2.87778	3.90383
UBE2T	7.64089e-07	-6.11686	5.87856e-05	1.18013	0.482149	-1.64154	-0.809305	-1.60869	-0.970871	-1.8146	-0.848081	0.172568	-0.610974	-0.808887	-1.14274	0.448795	-0.639052	0.0730509	-0.337477	0.116194	-0.469668	-1.54073	0.442582	0.87536	1.04453	0.971211	-1.05644	-0.000932473	0.196513	0.35012	0.35012	0.35012	0.298705	1.94918	0.620236	1.16548	0.959426	0.941801	1.567	-0.378507	-0.381123	1.13767	0.665478	0.764258	-0.337286	-0.813324	-0.559975	0.104	-0.106352
TRAV17	7.75638e-07	-6.11034	5.94822e-05	1.35282	0.24731	-1.13137	0.737267	-0.95986	-2.82721	-2.97541	-1.84161	-0.690726	-0.876886	-2.16708	-1.65233	-0.90633	-0.904505	-0.565588	-0.337477	-1.1949	-0.767533	-0.941227	2.1559	0.0786146	0.262438	0.533599	0.375474	0.337377	-0.218159	0.218105	0.218105	0.218105	-0.710329	1.57461	0.391316	-0.049486	0.580623	-0.266105	0.356117	0.88769	-0.539683	-0.570762	-0.512803	1.35053	0.268168	-2.48436	0.863704	1.07102	-0.427408
CCT2	7.82016e-07	-6.10678	5.97733e-05	0.612289	3.92906	2.91203	4.02548	2.6944	3.07895	3.23237	2.38133	3.61224	3.47574	3.37536	3.86829	3.07578	3.63914	3.98654	3.73169	3.36972	3.19243	3.47839	4.07944	4.30966	4.52325	4.12065	4.0998	3.74548	3.7552	4.34851	4.34851	4.34851	3.8643	4.88307	3.99335	4.04678	3.73555	3.81148	3.67503	4.06036	3.19522	3.23554	3.40302	4.34718	3.77287	2.97378	4.07169	3.91513	3.46334
ALG3	7.84446e-07	-6.10544	5.97733e-05	0.538369	4.07371	3.63477	3.82218	3.24065	3.47604	3.17077	3.15332	3.51151	4.35707	3.88629	3.01213	3.11091	3.67005	4.21806	3.66413	3.91886	3.32439	4.55348	4.84895	4.46131	4.3304	4.03296	4.17076	4.19986	3.98557	4.27289	4.27289	4.27289	3.69289	4.4411	4.20221	4.05719	3.98776	4.23574	4.67228	4.10132	3.63643	3.56658	3.89381	4.34907	4.09551	3.09956	4.08848	3.92641	3.83524
POLR3D	7.90068e-07	-6.10234	6.00099e-05	0.600719	3.88792	3.62686	3.89487	2.49439	2.80174	2.6451	2.70057	3.20905	3.5318	3.58521	2.87309	3.55543	3.78746	3.73802	3.61727	3.68485	3.41828	3.60975	4.04862	4.20967	4.25902	4.22147	4.22734	3.69341	3.46855	4.05156	4.05156	4.05156	3.33097	4.64926	3.90488	3.4932	4.22949	4.19609	4.0051	4.41331	3.69101	3.39634	3.50719	4.48042	3.97193	2.51321	4.48569	4.35149	3.40773
UFSP2	7.95883e-07	-6.09915	6.01122e-05	0.600833	2.7248	1.72761	2.32432	2.205	2.23601	2.29858	1.36921	2.26501	2.85049	2.31639	1.9844	1.97389	2.68163	2.24848	2.10536	2.45519	1.85535	2.21804	3.24184	3.16639	2.91257	2.70717	2.93296	2.85443	2.33862	3.16439	3.16439	3.16439	2.44613	3.38459	2.75907	2.36619	3.00568	2.77042	2.82956	2.859	2.5167	1.89811	2.24923	2.75589	2.52218	1.29622	2.97836	3.0038	2.18365
VARS1	7.96455e-07	-6.09884	6.01122e-05	0.614536	4.84076	4.63984	4.88997	4.57231	4.15549	3.3482	4.26455	4.02022	4.95506	4.48844	4.53788	3.81179	4.31901	4.07509	4.20825	4.20359	3.97039	4.79347	5.07227	5.71998	4.69735	4.842	5.01446	5.05168	5.01776	4.89768	4.89768	4.89768	4.61267	5.66394	4.61982	4.90562	4.19059	4.51027	5.04478	4.53415	4.05237	4.46732	4.80993	5.53624	5.1847	3.95122	4.92009	4.87061	4.40758
MBNL2	8.57611e-07	-6.06671	6.45237e-05	0.646746	5.42767	4.46879	5.12179	3.73004	4.43952	4.79203	4.47948	4.32425	6.0768	4.96657	4.79762	4.75481	5.0166	5.15655	4.83184	4.98888	4.93994	5.47749	5.85666	5.58749	5.20188	5.05732	5.61717	5.35515	5.23071	5.74183	5.74183	5.74183	5.38326	5.25771	5.44102	5.21396	5.44479	5.61476	5.93371	5.54197	5.13801	4.35925	5.01716	5.64918	5.78422	3.9081	5.65838	5.40457	5.11135
TET1	8.62353e-07	-6.06431	6.46765e-05	0.617159	2.89442	1.78566	2.41184	1.55328	2.10281	1.52457	2.11588	2.35721	3.19238	2.46024	2.5798	2.25084	3.01588	2.68818	2.03578	2.38544	2.42482	1.84404	3.22356	3.1516	2.94662	3.45423	2.79999	3.32649	2.41804	3.11575	3.11575	3.11575	2.69203	3.5764	2.60715	2.82191	3.20617	3.27032	3.36025	3.21676	2.75738	2.73171	2.16181	3.11615	3.37397	1.66517	3.12875	2.90843	2.49954
BCL11B	8.66081e-07	-6.06244	6.47525e-05	0.907313	6.42825	5.81432	6.46996	4.86743	5.33111	4.33916	5.09	6.11663	5.86533	5.89966	5.83775	4.34679	6.33674	5.20396	5.57873	6.22839	5.24932	5.57539	7.18496	6.68313	6.62609	6.68012	7.14207	6.22375	6.08621	6.58913	6.58913	6.58913	5.4045	7.67513	6.79634	5.91593	6.4702	6.19925	6.81556	6.66164	6.29219	5.2003	5.05809	7.05094	6.98363	4.28554	7.03031	7.21803	5.93569
RPL23A	8.70958e-07	-6.06	6.49136e-05	0.597626	6.47967	6.27831	6.35781	5.52781	5.25293	5.47376	5.49865	5.73194	6.73565	5.77983	5.83775	5.92452	6.10758	5.98322	5.92342	6.06091	6.45856	6.37572	6.88178	6.52999	6.70878	6.57113	6.71603	6.36265	6.23161	6.75662	6.75662	6.75662	6.75052	6.93764	6.86159	6.77261	6.76642	6.49604	7.41757	6.50352	5.97782	5.10749	6.00775	6.69961	7.03221	5.27164	6.45902	6.40576	5.99768
H3C1	9.12004e-07	-6.04	6.7692e-05	1.03102	3.28632	2.4381	2.36875	3.5119	0.956956	1.06442	2.14624	2.37496	2.66237	2.7857	2.76282	2.119	2.14382	2.67407	2.14994	2.29322	2.36948	1.84404	3.81825	4.23093	3.41395	2.66536	1.45315	3.53151	3.5821	3.41109	3.41109	3.41109	3.15079	4.76025	3.21655	4.04329	3.53902	3.57646	4.32172	2.59789	2.12569	1.87099	3.50127	3.34497	3.01005	2.79598	2.94187	2.73113	2.36327
OCIAD2	9.13913e-07	-6.0391	6.7692e-05	0.743247	2.18075	1.27977	2.26287	1.06825	0.652524	1.16894	1.05405	1.79674	1.36932	1.58878	1.59148	1.42289	1.97587	1.99975	1.49434	1.56576	1.68449	1.19634	2.72265	2.44679	2.72125	2.30595	2.4403	2.18216	1.78074	2.48144	2.48144	2.48144	1.26993	3.06296	2.53038	1.86377	2.68593	2.01134	2.90265	2.58351	1.66237	1.81518	1.41017	2.34431	2.15866	0.627592	2.45418	2.43729	1.96138
RPL14	9.25824e-07	-6.03347	6.79059e-05	0.532388	6.89217	6.44856	6.73541	6.00236	5.73908	5.94224	6.18348	6.39306	7.00812	6.23253	6.88727	6.13115	6.52434	6.51834	6.66889	6.53963	6.67086	6.73753	7.40171	6.69338	7.17266	6.95523	7.13222	6.84929	6.48775	7.13357	7.13357	7.13357	6.82113	7.33698	7.15799	7.04	7.12362	6.96286	7.70719	6.99077	6.44822	5.92556	6.24069	7.16769	7.25362	5.78031	6.82077	6.91908	6.46762
PCNA	9.27996e-07	-6.03245	6.79059e-05	0.721388	4.38837	3.90736	3.80072	3.5119	3.03087	2.95386	3.30229	4.00889	3.73653	3.76838	3.78611	3.7388	3.93217	4.18859	4.12135	4.20359	3.91992	3.94442	4.87846	5.02709	4.87052	4.59438	4.09575	4.4223	4.138	4.70151	4.70151	4.70151	3.90821	6.16939	4.48683	4.73238	4.25986	4.32666	4.88763	4.40516	3.40568	3.80016	4.27332	4.83001	3.74205	3.69996	4.33909	4.30616	4.09198
DRAM1	9.30493e-07	-6.03129	6.79059e-05	-0.717255	5.12009	6.04423	4.84351	4.84423	4.9161	5.66684	4.96572	5.52887	4.69452	5.36624	6.61909	6.27232	4.47767	5.57236	7.10089	5.13152	5.32642	5.7326	4.80965	5.2273	4.61927	4.59717	4.8703	4.99546	4.66849	4.9832	4.9832	4.9832	5.19002	4.22899	4.83802	4.61043	4.43646	4.68272	4.1014	4.14115	4.90774	5.07221	5.21109	4.55581	4.11969	5.6443	4.3079	4.05529	5.22652
AC092692.1	9.32418e-07	-6.03039	6.79059e-05	-0.707605	3.94286	5.05122	4.1789	3.33684	4.22836	4.84031	4.05653	4.89734	3.25201	4.87254	3.55751	3.76109	3.68223	4.91105	4.50281	5.16833	5.06131	4.79654	3.55133	3.42198	2.72125	2.29228	3.59158	3.53151	3.68201	3.58196	3.58196	3.58196	4.27813	3.64743	3.65919	3.91941	3.88919	3.79742	3.1694	3.25356	3.66398	3.74894	4.49817	3.22281	3.55205	4.83518	3.22905	3.32682	4.17574
ST6GAL1	9.33844e-07	-6.02973	6.79059e-05	0.589459	7.34171	7.0355	7.40659	6.64582	6.37986	5.8568	6.15297	6.72004	6.97627	6.88568	7.03469	7.78189	6.9043	5.53187	6.50049	7.1727	7.09712	7.11276	7.88984	7.88329	7.25955	7.00532	7.67526	7.16022	7.09377	7.23846	7.23846	7.23846	7.10084	7.69651	7.45249	7.11583	7.38794	7.64568	7.36501	7.64926	6.72274	6.44439	7.25526	7.69798	7.51813	6.6436	7.73828	7.64637	7.0246
MIR17HG	9.35979e-07	-6.02873	6.79059e-05	0.72034	1.79585	1.57137	1.16433	0.621302	0.472248	1.00918	0.5629	1.59944	1.30642	0.791903	1.77311	1.04103	1.27667	1.55249	1.59453	1.12689	0.613899	1.61302	1.13288	2.34644	2.18408	2.08592	2.30663	1.66221	1.33887	2.02191	2.02191	2.02191	0.648557	2.49251	2.13057	1.86377	2.30397	1.66925	2.01081	2.44717	1.14167	1.53324	1.43525	1.53407	1.72652	1.17674	2.07743	1.91018	1.18436
NOL9	9.36731e-07	-6.02839	6.79059e-05	0.545373	4.97454	4.62003	4.9594	4.079	4.45782	3.5358	4.20451	4.42568	5.20613	4.62702	4.51255	4.41865	4.7273	4.66581	4.30013	4.52476	4.415	4.7904	5.22483	4.98182	5.00264	5.30034	5.35131	4.94192	4.49925	4.9191	4.9191	4.9191	4.55514	5.73633	4.91984	4.3755	4.84486	4.71861	4.99551	5.20406	4.64287	4.37864	4.57632	5.4754	5.33241	3.77044	5.25945	5.38971	4.57679
PLIN4	9.42014e-07	-6.02594	6.80819e-05	-0.978831	4.28637	5.44711	3.988	5.24574	5.25293	6.15919	5.90593	4.89426	3.89455	5.03455	4.54623	4.31701	4.08677	4.14834	5.3229	5.08827	3.9327	5.45243	3.34693	3.91345	3.62633	2.99566	3.24941	4.33815	4.83691	2.63602	2.63602	2.63602	4.63244	2.44012	3.72956	4.54782	3.23704	3.76527	3.0241	2.66773	4.28307	4.00114	4.26635	2.25865	3.63588	5.12334	3.38393	3.53272	4.77536
SLC51A	9.57287e-07	-6.01896	6.86327e-05	-1.76343	2.98883	4.21257	0.321183	5.49542	2.95561	4.92484	1.73147	3.63452	-0.104251	3.51372	5.98622	5.74421	1.56676	2.06607	4.69561	1.79825	1.74372	1.7459	1.13288	2.40997	2.50977	2.06998	-0.678309	3.17442	2.70868	-0.147001	-0.147001	-0.147001	1.97472	0.616951	2.40082	1.35743	0.921926	3.29555	0.356117	-0.16919	4.31818	3.70355	3.70571	-0.433465	-0.194165	4.51222	0.250927	0.958319	4.36604
AC008555.4	9.57847e-07	-6.0187	6.86327e-05	0.906835	2.69394	1.97219	2.63438	0.706082	1.88571	1.40125	1.20588	1.65862	2.40155	1.97687	1.42043	1.99911	2.86377	1.78027	1.27033	2.48884	1.30647	1.30372	2.57183	2.49447	2.8635	2.57793	3.37493	2.8857	2.03702	2.94529	2.94529	2.94529	2.11248	3.41748	3.37548	1.97044	3.28951	3.2185	2.73489	3.52594	2.91855	1.53324	1.16245	3.12498	3.13732	0.565522	3.28255	3.26301	2.43919
ITM2C	9.58268e-07	-6.01851	6.86327e-05	1.5522	5.10907	4.0265	4.37677	5.44698	2.11823	2.89412	3.08445	2.79982	3.95219	3.93089	3.86162	2.60311	3.9921	3.44591	3.93646	2.73304	3.30486	4.09652	5.14936	6.89056	5.49781	3.46036	3.26391	5.39554	4.979	4.95755	4.95755	4.95755	4.69645	3.74567	4.34354	5.85757	4.77296	6.21123	6.26082	3.40028	2.74022	3.98225	5.69909	4.67633	4.10938	4.17036	4.94795	4.1893	4.7557
KIF22	9.67621e-07	-6.01429	6.8914e-05	0.669653	3.78811	2.98817	3.46785	3.32349	2.43385	1.67413	2.6903	3.42894	3.80638	3.31776	2.62778	3.03977	3.72995	3.48683	3.34742	3.48258	3.46303	2.85793	4.03819	4.16249	4.0926	3.89957	3.63126	3.81209	3.5821	3.96497	3.96497	3.96497	3.19577	5.11796	3.42479	4.05719	3.50138	3.72499	3.97906	4.04994	3.63643	3.20329	3.51309	4.47525	3.96814	2.66891	4.06153	4.0136	3.21963
NCR3	9.67974e-07	-6.01414	6.8914e-05	0.897336	2.52503	0.805843	1.59665	0.435151	1.20821	2.20335	1.71131	1.37083	2.43134	1.86641	2.03272	2.6831	1.91525	1.1248	1.98746	1.20994	1.88196	2.43828	4.10464	1.57496	1.92185	2.37242	2.70755	3.07845	2.59935	2.63602	2.63602	2.63602	1.65209	3.15684	2.47293	1.98505	2.80401	2.36597	3.51847	2.65403	3.16982	2.43111	0.825752	3.07574	3.2099	1.50904	2.78595	2.0948	2.3762
IL1R1	9.7546e-07	-6.01079	6.92403e-05	-1.24192	6.16175	6.26944	5.27943	7.67601	6.84654	7.41993	7.5908	6.46216	6.07915	7.44064	7.42642	8.83304	5.32504	5.27577	6.78122	6.42589	6.37907	6.6529	4.79734	5.6806	4.23993	3.19248	5.08147	5.25294	6.03149	4.50306	4.50306	4.50306	6.63604	3.86572	5.09951	6.37088	4.41638	5.81211	3.89796	3.8116	6.95234	6.72178	6.65037	3.46803	5.45964	7.60856	4.4049	4.12222	6.26088
TRBV11-2	9.8136e-07	-6.00817	6.94187e-05	1.57943	-0.0413225	-0.755238	-0.359403	-2.09055	-2.10019	-1.46255	-3.40099	-2.06551	-3.26968	-0.669215	-2.4473	-3.08484	-0.765681	-2.0788	-0.939815	-1.4262	-0.341015	-1.31209	-0.0860906	-0.273964	-0.856972	-0.171443	-0.378989	0.396464	-1.38626	-0.47924	-0.47924	-0.47924	0.231162	1.24884	-0.76153	-1.79595	-0.420644	0.0507696	0.609996	-0.16919	-1.79419	0.12395	-0.958773	2.43939	0.991681	-3.13743	0.551373	1.7331	-0.965996
STK3	9.87436e-07	-6.00549	6.94187e-05	-0.803775	4.96136	6.50688	4.95212	4.97811	5.3767	6.685	5.2523	5.5776	4.15769	5.44137	5.94421	5.03031	4.5886	5.54743	5.69425	5.41581	5.6112	6.04139	4.40562	4.50852	3.88702	4.26411	4.56252	4.75702	5.21967	4.39511	4.39511	4.39511	5.14944	4.08288	4.83118	4.36157	4.4231	4.71113	3.93327	4.05516	5.16075	4.76487	5.45891	4.02753	3.64066	6.31148	4.20081	3.88846	5.62222
AL592158.1	9.92933e-07	-6.00308	6.94187e-05	-2.0558	2.01101	-0.755238	-0.359403	2.95908	3.57994	2.10138	6.03117	2.35721	3.88382	2.28238	2.98783	4.65915	1.06973	1.58301	-0.466151	0.278916	2.21061	4.96414	-1.52944	0.198604	0.537314	1.41141	-0.057269	-0.250008	0.93304	-0.47924	-0.47924	-0.47924	1.23587	-2.00425	-0.655222	0.786078	-0.157187	-0.389344	0.356117	-2.12819	-0.921153	1.18248	1.78649	-1.66797	0.409366	5.17881	0.589608	-1.17377	-0.180169
FBXO4	9.932e-07	-6.00296	6.94187e-05	0.694748	1.61375	0.268194	1.49343	1.00273	0.372892	1.21849	0.772023	0.86782	1.69812	0.839462	1.00201	1.45969	1.429	0.747634	1.00503	0.944893	0.334534	1.19634	1.17154	1.70222	2.01466	1.86363	1.86812	1.96513	1.07048	1.85415	1.85415	1.85415	1.16525	2.71165	1.46207	1.56622	1.9783	1.75905	1.73652	2.12846	1.66237	0.590882	1.30529	2.12421	1.59473	0.565522	1.82842	1.49126	1.56932
RRP15	9.95402e-07	-6.002	6.94187e-05	0.665279	2.86974	1.92131	2.55969	2.36999	2.08722	1.48462	1.90127	2.3026	2.68727	2.22981	2.49612	2.58656	3.1	1.83201	1.98746	2.6161	1.93375	2.61548	2.99474	3.12913	3.33388	3.06161	3.21997	2.8857	1.89619	2.99992	2.99992	2.99992	2.80086	3.80487	3.04582	2.5445	3.42301	3.00874	3.00209	3.52594	2.61408	2.21088	2.45937	2.99617	3.08213	1.17674	3.17977	3.28069	2.26934
ABTB2	9.95846e-07	-6.00181	6.94187e-05	-0.921302	3.28484	4.03251	4.27541	4.06302	3.62382	4.50808	2.36851	5.54464	2.00585	3.49899	2.97552	1.49558	3.75323	4.03702	2.94103	4.57262	4.42408	4.2113	2.49769	2.22452	2.95333	3.47858	3.86795	2.84386	2.96817	3.19398	3.19398	3.19398	1.99522	3.35094	2.80635	2.8778	2.46907	2.39427	1.77163	3.67583	3.7692	3.23554	2.67469	2.6063	2.51178	3.40442	2.91201	2.39461	3.28966
C14orf93	9.98349e-07	-6.00072	6.94187e-05	-0.50795	3.84371	4.09697	4.34377	4.83955	4.37679	4.08908	4.46751	4.70722	3.55904	4.39206	4.11827	3.94755	3.83732	3.32473	4.00481	4.80075	3.75698	4.51303	3.50667	3.7947	3.48519	3.16273	4.03787	3.9015	3.61056	3.42113	3.42113	3.42113	3.29834	3.62883	3.50723	3.21806	3.59965	3.76166	3.09512	4.00208	3.89852	4.12682	3.82907	3.32977	3.17076	4.462	3.869	3.64622	3.82584
MTCO2P11	1.01253e-06	-5.99459	6.99967e-05	-0.656018	4.25828	5.87239	4.13671	4.03871	4.63444	5.31483	4.03641	4.94862	3.55228	4.33513	4.70375	4.82348	4.33453	4.71142	5.02375	4.85336	4.98359	5.07187	3.86028	4.03126	3.25455	3.03723	3.82948	3.73407	3.91888	4.08353	4.08353	4.08353	4.54126	4.31296	3.93498	3.77551	4.03243	4.03166	3.1694	4.13129	4.48192	4.12108	4.23813	3.41142	3.17076	5.3657	3.58658	3.68215	4.56554
SSRP1	1.01253e-06	-5.99459	6.99967e-05	0.558841	4.59112	4.19662	4.56355	3.81838	4.04687	3.45542	3.6429	4.07011	4.58285	4.33927	4.04948	3.99846	4.13631	4.39188	3.92368	4.47105	3.82712	4.50179	5.23399	5.1679	4.79029	4.96557	4.93288	4.56756	4.5442	4.81821	4.81821	4.81821	4.24427	5.72542	4.39393	4.62683	3.97408	4.24094	4.34231	4.45341	4.05237	4.01359	4.30767	5.1376	4.86937	3.35023	4.82714	4.55655	4.18679
GCNT1P3	1.02224e-06	-5.99045	7.04639e-05	-1.05296	1.22546	1.92131	-0.178042	0.435151	2.2218	3.10642	3.15332	1.09903	1.76981	1.1346	2.23212	1.38512	1.76301	1.55249	2.35429	1.24974	2.29223	1.79581	1.09315	1.10769	-0.0774376	-0.097601	0.977928	1.07628	0.611276	0.930765	0.930765	0.930765	1.23587	-0.165778	0.119093	1.08636	0.373977	-0.455151	0.047814	0.632212	2.39045	-0.570762	0.935258	-0.486267	1.51363	2.52956	0.863704	-0.642502	1.15464
MRPS12	1.0356e-06	-5.98481	7.11787e-05	0.580467	2.66355	1.78566	2.1655	1.98513	1.88571	2.17853	1.51592	2.35721	2.88318	2.22981	1.18417	1.78379	2.70569	2.75671	2.12782	2.36746	1.85535	2.68334	2.74846	2.64991	2.89872	2.84464	2.47809	2.48407	2.33862	2.88126	2.88126	2.88126	2.49014	3.18258	2.88774	3.12215	2.92268	2.79893	3.47653	2.89438	2.20285	2.3743	2.62106	2.9768	2.78664	0.744252	2.68361	2.29371	2.54606
DPH2	1.0409e-06	-5.98259	7.13374e-05	0.542015	3.04993	2.50873	3.12351	2.39574	2.17832	2.53206	2.0043	2.52562	2.86147	2.63213	2.23212	2.63564	2.83132	2.88472	2.58287	2.87977	2.29223	3.23783	3.2509	3.67567	3.2974	3.41061	3.07128	3.14887	2.86801	3.12807	3.12807	3.12807	2.35388	3.60998	3.43686	3.16129	3.30416	2.94	3.32523	3.23528	2.79108	2.43111	2.70593	3.50907	3.22272	1.80604	3.51885	2.8855	2.55746
GOT2	1.04828e-06	-5.97952	7.14821e-05	0.584172	4.18118	3.92684	4.27929	3.33684	3.0631	3.01122	2.98718	3.61971	4.22301	3.88062	3.66105	3.14521	3.53554	4.10168	3.63306	4.06546	3.72058	3.85897	4.7566	4.7486	4.2289	4.46023	4.22734	4.31918	4.16894	4.2949	4.2949	4.2949	3.81901	5.32426	3.94346	4.26308	3.44961	3.8392	4.19813	3.88966	3.70876	3.37719	4.04398	4.45963	4.3208	3.17425	4.46012	4.35706	3.81638
PCDH9	1.04974e-06	-5.97892	7.14821e-05	1.28337	4.27262	4.38208	4.84351	2.36999	3.07105	3.31441	2.19061	1.53774	3.43955	2.89103	3.68392	1.97389	2.65715	2.57127	2.49919	2.6161	2.252	3.9987	4.14406	5.36191	5.18628	2.97013	4.33425	4.25677	3.64398	2.74398	2.74398	2.74398	4.34356	1.29676	4.37524	3.97538	6.1148	4.96965	5.11823	5.26841	1.42538	4.44451	3.63172	3.91496	4.07092	3.70717	4.69088	5.37469	3.677
MSRA	1.052e-06	-5.97798	7.14821e-05	-0.663797	4.56382	5.10065	4.29088	5.10842	4.86217	5.74712	4.62669	4.67534	4.34147	4.65054	6.06965	6.37944	4.36507	4.29842	5.0327	4.325	4.58253	5.10441	4.48835	4.10606	3.81142	3.57205	4.27465	4.033	4.95701	4.00224	4.00224	4.00224	4.77859	4.32745	4.25769	4.46423	3.71377	4.40988	4.21097	3.61349	5.58973	4.21574	4.49221	3.81211	4.29676	4.38323	3.91865	4.26232	4.44489
H3C11	1.05998e-06	-5.9747	7.18198e-05	0.879524	4.48482	3.93968	4.20364	3.38906	2.67191	2.93915	2.88288	3.90886	3.71247	3.87493	3.57393	3.39367	3.21345	4.74891	3.96169	3.97337	4.02513	3.58157	4.91595	5.06706	5.08597	3.99126	3.83919	4.39358	4.90282	4.58574	4.58574	4.58574	4.47711	6.04248	4.43963	5.29536	4.99009	4.56317	5.39929	3.82389	3.29256	3.84266	4.71586	4.73084	4.28764	3.55576	4.37511	3.73013	3.87223
MCM4	1.06705e-06	-5.97182	7.19687e-05	0.966878	4.17267	3.87431	3.4814	3.35008	2.31843	2.17853	3.05275	3.42894	3.53866	3.4841	3.42801	2.96494	3.28707	3.96353	3.5187	3.6993	3.01146	3.43967	4.51866	5.17157	4.17821	4.5691	3.12786	4.2286	4.41787	4.38488	4.38488	4.38488	3.2394	6.45461	3.96446	4.59384	3.55748	4.11054	4.45189	3.45661	2.65126	3.77112	4.54499	4.73517	3.7685	3.79769	4.07169	4.04498	3.66651
CAPNS2	1.06821e-06	-5.97134	7.19687e-05	-0.837014	1.85606	3.65048	1.82639	2.205	1.7537	3.15812	1.82826	2.6764	1.48744	1.31365	2.74842	2.14183	1.80817	2.49307	2.58287	2.52172	2.92454	3.15421	0.563809	1.30775	1.47613	0.749058	1.37517	1.5881	2.07018	1.55905	1.55905	1.55905	2.32177	1.57461	1.43825	1.62339	0.843868	1.17719	-0.135177	0.88769	2.17759	2.2949	1.78649	0.694801	0.693343	2.74088	0.863704	0.958319	2.67726
IGHV2-5	1.07834e-06	-5.96724	7.24462e-05	2.39754	3.23648	0.913901	3.52785	0.934088	-2.10019	0.0975504	-0.347488	0.592353	0.566917	1.37949	2.46123	-1.10699	-0.314709	-0.211215	0.413241	-1.1949	1.14008	4.43644	3.76236	5.48502	0.912929	0.334578	-0.919084	4.20813	1.58815	2.7599	2.7599	2.7599	2.53284	1.49467	2.36337	4.12474	0.132703	3.45183	3.6422	1.36225	-2.96017	-0.429206	3.0195	2.74448	1.92774	2.94968	1.72915	1.15012	4.03195
TMLHE	1.0894e-06	-5.96281	7.29836e-05	-0.600159	4.8831	5.6226	4.485	4.96096	5.28061	6.00888	5.57036	5.38953	4.60589	4.89522	5.86469	5.80268	4.82392	4.68704	5.59091	5.22932	5.40879	5.4794	4.38108	4.44321	3.97544	3.51434	4.57129	4.30383	5.08825	4.38231	4.38231	4.38231	5.06467	4.18191	4.69963	4.55274	4.43646	4.66153	4.07353	4.32529	5.32795	4.60124	5.17434	4.32628	4.82804	6.08134	4.2464	4.21405	5.08402
IGHG1	1.0969e-06	-5.95983	7.32803e-05	2.45541	9.28699	8.59851	7.70002	8.91472	2.07146	4.8244	6.24701	3.03014	7.56189	8.24624	7.76356	5.32526	5.83091	5.28508	6.08858	3.66291	6.09905	8.00225	9.98454	11.0891	9.0233	7.31852	3.13576	9.78627	9.92305	8.67479	8.67479	8.67479	7.22267	7.25596	8.16025	9.9419	8.00254	9.9295	9.80347	5.70862	4.06621	7.72572	10.7172	7.59133	8.42294	9.21793	8.75359	7.94259	8.95531
UTP4	1.10095e-06	-5.95823	7.33455e-05	0.467834	3.92715	3.5452	3.86933	3.35008	3.22142	3.20804	3.25432	3.51151	3.92628	3.49899	3.10545	3.32551	3.87495	3.99791	3.65643	3.56377	3.30486	3.32538	4.04342	4.16617	4.14046	4.39458	3.96432	3.92677	3.68737	4.1148	4.1148	4.1148	3.92967	4.68796	4.29464	4.03629	4.02803	3.97968	3.97152	3.8955	3.18258	3.65668	3.63172	4.53278	4.10938	3.14271	4.12474	3.8296	3.48738
NCAPD3	1.11127e-06	-5.95418	7.38265e-05	0.533923	4.68484	4.24397	4.53459	4.29283	3.99351	3.50618	4.0645	3.98597	4.49743	4.29731	4.14599	4.19134	4.58536	4.37454	4.35353	4.47945	3.97657	4.25656	5.00696	5.31952	4.57642	4.87676	4.70481	4.5152	4.382	4.71993	4.71993	4.71993	4.40997	5.92541	4.68705	4.42725	4.52354	4.54013	4.78826	4.76198	4.37485	4.10953	4.55361	5.12225	4.8775	3.77044	4.95529	4.86866	4.38216
N6AMT1	1.11578e-06	-5.95242	7.39207e-05	0.62598	2.79251	2.22387	2.52085	1.76569	1.71365	2.22776	1.46865	2.40983	2.57168	2.17525	2.21128	2.65163	2.51458	2.46057	2.70743	2.23493	1.77245	1.7459	3.07851	2.94408	3.27613	3.10917	3.2711	3.12287	2.08648	2.97968	2.97968	2.97968	2.33792	3.09041	3.25795	2.45285	3.25976	3.02089	3.19549	3.24445	2.85622	2.07489	2.08468	2.75019	2.9877	1.75133	3.25307	2.916	2.26934
CPD	1.122e-06	-5.95001	7.41201e-05	-0.947789	8.94391	9.83726	8.65683	9.42607	10.3983	10.3658	9.99607	9.02502	8.84695	9.58382	10.7513	8.82204	8.24101	10.2159	9.42964	8.89861	8.92065	10.2014	8.61906	8.14371	7.51265	7.54938	8.71372	8.60585	9.22655	8.20791	8.20791	8.20791	9.29906	7.604	8.15318	8.71697	7.68761	8.60673	6.98781	7.26705	9.19221	8.52241	9.25635	8.04909	8.33088	10.1455	7.89511	8.11331	9.61544
MIR503HG	1.12517e-06	-5.94878	7.41201e-05	-1.07627	0.396136	1.604	-0.809305	1.06825	0.025704	0.469077	0.207438	1.09903	-0.386529	0.527293	2.3126	3.15646	-0.522645	0.948509	1.00503	0.895566	-0.341015	-1.11477	-2.57593	0.83889	0.173218	0.0396289	-0.131226	-0.443692	-0.300535	-0.555967	-0.555967	-0.555967	-0.358527	-0.452251	-0.0060182	0.00888911	0.480997	-0.266105	0.4458	-0.16919	-0.381123	0.834956	0.747839	-0.382527	0.217855	0.744252	-1.81233	-0.734244	-0.180169
TC2N	1.12979e-06	-5.947	7.41201e-05	0.781168	6.22775	5.60658	5.87345	4.53803	4.93364	4.22257	4.80852	5.77269	6.25288	5.89826	5.61386	4.87548	6.46389	4.72174	5.58483	5.95354	5.94038	5.0617	5.90191	6.48645	6.39899	6.31136	6.45603	6.20838	5.53678	6.40214	6.40214	6.40214	5.72763	7.26803	6.88985	5.95543	6.66792	6.23425	6.40406	6.68034	6.29806	4.56785	5.48766	6.49007	6.66947	5.22973	6.78002	6.71687	5.9819
GNG5	1.13123e-06	-5.94645	7.41201e-05	-0.569247	3.54182	3.89423	3.96889	4.06302	3.99351	4.25262	3.28875	3.77486	2.83942	3.94726	4.29704	3.90147	3.93217	3.91638	4.27519	4.35268	4.11199	4.07647	3.52917	2.51772	2.96667	2.22192	3.52091	3.54463	3.89594	3.39079	3.39079	3.39079	3.71159	3.02789	3.56336	3.27269	3.59965	3.66817	2.94171	3.15973	3.59886	3.53237	3.54799	2.59998	2.7517	3.99308	2.81044	3.0038	4.07224
C1orf162	1.14226e-06	-5.94224	7.4638e-05	-0.649301	7.32251	7.21125	7.08466	8.19225	7.91186	8.39502	7.32079	6.94097	7.39433	7.40107	8.91126	8.61687	7.47097	7.83605	7.74774	7.53322	7.15281	8.33715	7.30503	6.87658	6.93468	7.66792	7.68337	6.68792	6.44652	7.79712	7.79712	7.79712	7.00614	7.18012	6.95056	6.79818	6.58861	6.56924	7.13031	7.17891	7.37467	7.36479	7.14418	7.29294	6.58018	7.57941	6.64866	6.63215	7.22288
JHY	1.15276e-06	-5.93826	7.51187e-05	0.77553	1.84614	0.860883	1.78328	1.80466	0.886656	0.624202	0.60722	1.09903	1.8157	1.17223	0.61455	-0.302831	1.45762	1.93023	0.904521	1.20994	0.847844	0.766647	1.13288	1.61864	1.88017	2.20742	2.11201	2.38543	0.418749	2.08644	2.08644	2.08644	2.22092	2.0505	1.41403	1.84787	2.06686	2.61074	2.29044	1.86862	1.98715	1.42552	1.53139	2.11538	2.13174	1.60473	2.84246	2.39461	0.996116
KCNE5	1.15794e-06	-5.93631	7.52503e-05	-0.981086	0.899117	2.67153	0.737267	1.30411	1.37154	1.99166	1.20588	1.53774	-0.610974	1.77152	1.14074	1.94822	0.590229	1.67087	1.38668	2.06686	1.90808	2.28946	-1.52944	0.683028	0.262438	0.623679	0.32105	0.707703	0.196513	-0.637004	-0.637004	-0.637004	1.51681	-0.165778	0.177802	0.490755	0.995977	-0.0473203	-0.0106416	0.575201	-0.108309	0.994239	0.622464	0.00948541	-0.194165	1.50904	-0.00987264	0.434054	1.02925
BCL7A	1.16449e-06	-5.93386	7.54702e-05	0.917661	2.74479	2.64041	3.41939	2.34376	1.42212	0.891907	1.64907	0.86782	1.39977	1.72163	2.25267	0.0264459	1.7164	2.12947	2.33511	1.36295	2.03206	2.5588	2.65604	3.39082	3.47589	2.70717	2.72861	2.71051	3.2688	2.50995	2.50995	2.50995	2.56062	2.02227	2.5416	2.34369	3.14239	2.89449	3.37744	3.51082	0.915854	2.76155	2.64275	2.95716	3.03205	1.29622	2.54455	3.33249	2.15392
EEF1A1P10	1.17589e-06	-5.92963	7.58727e-05	-0.766916	1.00786	1.35838	0.259601	1.91563	1.67246	2.40941	2.6903	1.37083	0.857579	1.09595	1.6546	2.07223	0.828049	0.900851	1.22937	1.12689	0.951975	0.551104	-0.634326	0.0786146	0.262438	1.00512	1.07978	0.753624	0.820619	0.307443	0.307443	0.307443	0.424986	0.981949	1.11678	0.570443	0.580623	0.228958	0.158066	1.10466	1.24257	1.09143	0.222523	0.254445	0.693343	1.85875	0.471721	-0.00605335	0.214878
ACVR1B	1.17804e-06	-5.92884	7.58727e-05	-0.712461	5.89241	5.83336	5.93384	6.88961	6.94062	6.79423	6.10064	5.94154	5.49412	6.50097	7.50826	7.1575	5.98019	5.9308	6.44118	5.70959	5.68105	6.49476	5.70676	5.42938	5.51039	5.33242	6.03783	5.44185	5.9369	5.71555	5.71555	5.71555	5.82247	5.22712	4.98499	5.75044	4.5908	5.45935	4.41072	5.00799	6.06306	6.08008	6.41386	5.36422	4.91746	6.78479	5.04574	5.15578	6.19398
LINC01128	1.1814e-06	-5.9276	7.58727e-05	0.644574	3.79951	3.17351	3.28676	2.08349	2.92085	2.71582	3.16819	3.23844	3.59238	3.31776	2.76282	3.14521	3.96245	3.44591	3.6718	3.53184	3.21354	3.20126	4.30052	4.0553	4.07424	4.196	4.17843	3.37137	3.29708	3.98203	3.98203	3.98203	3.78997	4.17231	4.29132	3.59674	3.92754	3.85964	4.16879	4.09626	3.49019	3.34799	3.0684	3.76488	4.57677	2.37529	4.01312	3.91135	3.26205
ABLIM1	1.18483e-06	-5.92634	7.58727e-05	0.672604	6.52966	6.46419	6.45888	5.53941	5.77357	4.52295	5.63467	5.9681	5.93066	5.83073	6.24651	5.86574	6.27777	5.54743	6.04202	6.00968	6.39532	6.205	6.9199	6.75523	6.63499	6.85767	7.13024	6.15377	6.28995	6.38493	6.38493	6.38493	5.88561	7.3835	7.0269	6.18875	6.33853	6.49113	6.73336	6.50447	6.29366	5.39134	5.70554	6.88416	7.08184	5.59077	6.89326	7.01465	6.42313
MAB21L3	1.1866e-06	-5.92569	7.58727e-05	-1.05606	2.56038	2.38276	2.93939	3.33684	3.0227	4.55705	4.09205	3.2481	2.67488	3.81075	2.73388	3.58072	1.80817	3.16243	2.79426	3.89396	2.23145	3.63738	2.33689	2.21032	1.39953	1.5784	3.13576	1.11197	1.80064	1.77804	1.77804	1.77804	2.69203	0.179213	2.31188	1.8795	1.7619	2.55333	0.158066	1.45997	1.98715	3.70355	2.57668	0.786686	1.23877	4.47472	1.38232	2.41611	2.51131
LRRN1	1.2073e-06	-5.91818	7.69896e-05	-1.29407	5.18318	5.53435	4.90262	6.36702	5.81083	7.09628	4.52351	5.94897	3.79497	5.74748	8.27844	6.92641	4.46362	4.94669	5.10808	5.6606	4.50762	5.72134	4.29177	4.59032	4.50051	2.97013	4.3749	4.14922	6.13109	4.5902	4.5902	4.5902	4.76073	2.23401	5.43049	4.22664	4.4298	5.22733	2.38417	3.75497	5.79886	5.10459	5.78936	3.12498	2.59298	5.62541	3.85337	4.74671	6.48115
CDKL5	1.21912e-06	-5.91395	7.75362e-05	-0.601393	5.83883	6.49497	6.35597	5.84067	6.65893	6.50452	6.56331	6.19117	5.5764	6.01806	6.98183	6.28005	6.02869	5.01543	6.12672	6.30595	6.68036	6.30532	5.61506	5.61201	4.95659	4.29528	6.05043	5.35329	6.19825	5.52731	5.52731	5.52731	6.05997	5.1623	5.31427	5.3114	5.11581	5.57514	4.69074	4.95869	5.41969	6.10357	6.32107	5.17634	5.63284	6.66596	5.22191	5.46254	6.16166
FKBP14	1.22965e-06	-5.91022	7.79975e-05	0.737459	2.06802	1.86857	1.38225	1.409	1.23675	1.31276	0.988541	1.37083	1.83811	1.47292	0.793471	1.38512	1.61838	1.99975	1.52852	1.36295	1.00135	0.954133	1.38401	3.02746	2.43498	2.10168	1.26416	2.14819	1.80064	2.28647	2.28647	2.28647	1.57245	2.22165	1.95706	2.21322	2.06686	2.28766	2.26603	1.91531	1.62548	1.84335	2.6101	2.32144	2.11808	0.687101	2.28973	2.15995	1.71896
TCF7	1.25461e-06	-5.90149	7.93699e-05	1.08595	7.07676	6.70602	6.97158	5.6425	5.73408	3.91967	5.57456	6.74756	6.09668	5.25006	6.14026	4.39033	7.0843	5.80699	6.6641	6.50305	5.80615	6.28362	7.63403	7.46452	7.61519	7.53349	7.80547	6.81518	6.57264	7.11281	7.11281	7.11281	5.98891	8.06587	7.83531	6.50305	6.71458	7.11161	7.793	7.35647	6.64998	5.69951	5.83482	7.23193	7.6042	4.56473	7.609	7.51182	6.7161
AC010632.2	1.26297e-06	-5.89861	7.96876e-05	0.768753	1.1553	-0.457167	0.947144	-0.029688	-0.0412469	-0.404141	0.087415	0.816775	1.0232	0.930122	-0.222267	0.373642	0.783518	0.851565	0.739269	0.844493	0.255338	0.429915	1.3166	0.87536	0.798257	0.788541	1.11219	0.798128	0.366316	1.71413	1.71413	1.71413	0.929912	1.34315	1.25952	0.819079	1.34668	1.1553	1.48476	1.8447	1.80117	0.890028	0.436308	1.3354	1.4277	-0.270011	1.9362	1.45017	1.15464
TBC1D4	1.27048e-06	-5.89603	7.99496e-05	0.822274	4.19194	3.74129	3.86416	2.08349	3.40237	2.74992	2.85558	3.96268	3.96242	2.44495	3.47248	1.75447	4.14073	4.14323	3.79623	3.75567	3.40916	3.84719	4.60594	4.27596	4.41553	4.9307	4.79742	3.92175	3.86321	4.31658	4.31658	4.31658	3.33097	5.23175	4.48102	3.85722	4.09274	3.96088	4.40514	4.41737	3.84336	3.64872	3.18385	4.67783	4.53885	2.09678	4.69746	4.54684	3.60741
CCDC86	1.30228e-06	-5.8853	8.1735e-05	0.538482	2.66197	2.36383	2.45369	2.42104	2.10281	1.16894	1.91896	1.68732	2.64976	2.19367	2.23212	1.72454	2.54157	2.63091	2.37322	2.23493	1.90808	2.5588	3.26884	3.0986	2.96667	3.14002	2.97762	2.77872	2.83945	2.75196	2.75196	2.75196	2.09359	3.60998	3.17392	2.83003	2.69707	2.46713	3.14283	2.847	1.98715	2.09846	2.14671	2.81164	2.63193	1.98267	2.61111	2.63357	1.92663
NAA15	1.31227e-06	-5.88198	8.21458e-05	0.556205	5.05254	4.53375	4.82237	3.91949	4.22124	4.27035	3.84611	4.52443	5.0324	4.77195	4.84913	4.68658	4.94511	4.77558	4.72537	4.70019	4.23577	4.73071	5.12247	5.44463	5.20046	5.15685	5.44017	5.04015	4.57917	5.46193	5.46193	5.46193	4.70581	6.06168	5.07462	4.44586	4.96034	4.93635	5.04837	5.48314	4.98986	3.96312	4.64778	5.41999	5.15325	3.84418	5.51177	5.21523	4.83043
PLAGL1	1.34637e-06	-5.87084	8.40598e-05	-0.668054	5.95788	7.28354	4.65906	5.90709	5.55727	6.76639	6.30702	7.09686	6.65196	5.82631	7.14458	6.55234	6.31344	5.69444	5.84424	6.22465	7.12315	6.88459	5.44991	5.80516	5.1177	5.01009	5.90654	5.517	5.79039	5.56063	5.56063	5.56063	6.39598	6.05908	4.90472	6.06525	5.71388	4.44186	5.32736	5.79386	5.93134	5.88037	6.16683	5.17421	6.06868	7.0257	5.1771	5.16692	5.49756
PSMG4	1.35829e-06	-5.86701	8.4583e-05	0.592361	4.63078	4.40541	4.47488	3.75015	3.97669	3.56482	3.94871	4.22985	4.66035	4.01096	3.38212	3.83998	4.55256	4.35699	4.20297	4.45412	3.67567	4.3721	4.80351	4.66774	5.15895	4.67297	4.8584	4.61808	4.26873	5.02166	5.02166	5.02166	4.14683	5.0071	5.18964	4.26308	5.27114	4.72047	5.3866	5.36197	4.41323	3.92407	3.88018	4.61655	4.76155	3.55576	5.04746	4.86671	4.16832
AC007877.1	1.38642e-06	-5.85811	8.5846e-05	-1.42974	2.57101	4.09697	1.35307	3.31001	2.8762	4.77558	4.20811	3.55109	2.79429	2.92449	4.47807	4.5567	1.61838	1.75369	3.21729	2.19471	3.74977	4.00932	1.3166	1.30775	-0.133253	1.25107	1.32073	1.4274	2.8298	0.171271	0.171271	0.171271	3.1599	-0.165778	0.991463	2.5738	0.317335	2.20486	-0.503639	-0.0749174	2.97829	2.70124	3.08434	-0.0291685	1.33633	4.38772	0.250927	0.803809	3.68742
DNAJC30	1.39054e-06	-5.85682	8.5846e-05	0.587175	3.32248	2.77546	3.18277	2.65228	2.73329	2.89412	2.39404	2.14599	3.00702	2.61856	2.3126	2.99032	3.23841	3.00229	3.15302	3.08071	2.62711	3.20126	3.08864	3.43425	3.82978	3.50252	3.5389	3.5049	2.96817	3.59975	3.59975	3.59975	2.76549	3.42289	3.4666	3.29045	3.89404	3.63693	4.31876	3.94696	2.6695	2.6383	2.64275	3.45758	3.36821	2.30105	3.69139	3.5811	2.94369
AC112496.1	1.39289e-06	-5.85608	8.5846e-05	-0.974238	3.54147	5.79678	3.13212	3.38906	3.70776	4.99405	4.15312	4.628	2.19135	3.93637	3.85492	3.7537	3.56872	4.59271	4.11575	4.41089	4.28146	4.93381	2.97301	3.23816	2.32537	1.53263	3.08767	3.2242	3.43075	2.44253	2.44253	2.44253	3.74224	2.34074	3.18111	3.21806	2.55732	2.71913	1.52646	2.73434	4.16592	3.50617	3.58207	2.08855	2.26159	4.57658	2.61111	2.01251	4.3628
PLIN5	1.39905e-06	-5.85417	8.5846e-05	-0.997326	4.39836	5.6696	3.84333	5.83597	4.96809	6.21823	5.67427	5.15536	3.98268	5.00618	5.09933	5.23525	4.27546	3.66144	5.39876	4.62652	4.60666	5.03338	3.04766	3.8958	4.13161	2.27848	3.05469	4.24476	4.65763	3.09081	3.09081	3.09081	4.60935	2.62043	4.16278	4.77925	3.47573	3.86302	3.43333	2.9175	4.92302	4.58464	4.40606	1.77747	3.65963	5.31	3.12224	3.39336	4.96065
PIK3C2B	1.40007e-06	-5.85385	8.5846e-05	0.641547	4.51284	4.49077	4.93005	3.79922	3.49979	2.93915	3.80389	3.74786	4.15323	4.09173	3.66105	3.48577	4.39868	3.82358	4.02291	4.05426	3.60555	4.0407	4.59531	5.04321	4.80892	4.41994	4.8584	4.47807	4.35871	4.33263	4.33263	4.33263	4.24855	4.68571	4.75851	3.96436	5.14662	4.54855	4.41628	5.11436	3.95908	4.525	3.82907	5.26388	5.24561	3.56372	4.78656	5.14937	4.16086
RPL10A	1.40056e-06	-5.8537	8.5846e-05	0.661857	5.90428	5.52799	5.70753	4.89025	4.46386	4.09573	4.92471	5.57376	6.16253	5.01397	5.44113	5.3958	5.14535	5.27344	5.52473	5.52526	5.75128	5.34549	6.01254	6.17151	6.24469	5.75244	5.95202	5.77116	5.67522	6.19826	6.19826	6.19826	5.90606	6.52735	5.90137	6.31558	5.94175	5.80861	6.40755	5.5985	5.38975	4.47184	5.35435	6.04131	6.58205	4.59611	5.78941	5.80975	5.48119
GPR84	1.40565e-06	-5.85212	8.5846e-05	-1.37531	4.42321	6.40524	2.9589	5.35151	2.947	6.3943	1.11671	4.51245	0.983542	4.35572	7.51359	6.28519	3.26294	4.93491	5.78892	4.14676	4.54139	3.37548	4.26072	4.11752	4.00805	3.47858	2.30663	4.74001	4.979	3.04608	3.04608	3.04608	4.94592	3.68393	4.40011	4.5698	1.9783	4.19609	1.93541	3.05937	4.61491	5.45436	4.86401	3.06201	1.23877	3.53162	2.67475	2.51903	5.57111
AGFG1	1.40737e-06	-5.85159	8.5846e-05	-0.88676	8.14956	8.54961	7.46489	9.10163	8.81788	10.3147	8.1445	8.38451	7.45856	8.65811	10.0163	9.13597	7.45198	8.17469	9.15656	7.82883	8.08045	8.58301	7.86757	7.51668	7.21099	6.82304	7.60368	7.70959	8.29718	7.58737	7.58737	7.58737	8.09198	7.39971	7.8373	7.57207	7.14615	7.6351	6.65149	6.93592	8.87125	7.86194	8.55385	7.13474	7.17832	8.71475	7.25288	7.12849	8.84726
ZNF593	1.41475e-06	-5.84932	8.60762e-05	0.760739	1.53435	-0.210259	1.43891	1.191	0.609523	0.199779	0.954636	0.86782	0.813022	1.37949	-0.0116025	-0.302831	1.03216	1.55249	1.1872	0.992588	0.847844	1.52699	2.0353	2.10676	1.70026	1.68686	1.07978	1.63793	1.78074	1.63004	1.63004	1.63004	1.3032	2.17112	1.28645	1.79908	1.99645	1.62217	2.3613	2.12846	0.318861	1.04365	1.82494	1.62401	1.02132	-0.387879	1.01185	1.34202	0.779569
TRBC2	1.42142e-06	-5.84728	8.61853e-05	0.913663	6.50588	5.98507	7.02403	4.75751	4.61826	4.17943	4.83438	6.24767	6.1243	5.83073	5.39567	5.49443	5.84588	5.25223	5.74054	6.14114	5.71289	5.68041	7.26089	6.49892	6.84996	6.62802	6.76081	6.84664	6.17938	6.79285	6.79285	6.79285	5.68409	7.30658	7.48482	6.26783	6.77301	6.77652	7.14125	6.86708	6.42156	5.16165	5.13853	7.28361	6.61158	4.22659	7.31696	7.12196	5.88795
MRPL45	1.42377e-06	-5.84656	8.61853e-05	0.537631	2.84679	1.99697	2.46738	1.98513	2.23601	2.15327	1.97077	2.35721	3.19238	2.3331	2.53018	1.94822	2.77557	2.49307	2.31567	2.6161	2.35055	2.69653	2.79872	2.92681	2.85636	2.97869	3.12786	2.27955	2.40511	3.1584	3.1584	3.1584	2.88017	3.59089	3.05367	3.05448	2.72999	3.06264	3.27105	2.6402	2.55645	1.56743	2.64275	3.17685	3.02475	1.83264	2.99981	2.78168	2.07679
IGLV3-21	1.42841e-06	-5.84515	8.62471e-05	2.33889	4.16732	2.74652	2.91962	3.85598	-1.61904	1.52457	1.58403	-0.421936	3.14823	2.0393	2.62778	0.373642	1.76301	1.48945	0.796482	-0.277448	1.80061	2.30677	4.20124	5.7436	4.22336	2.56662	0.144256	3.60849	2.94153	2.21899	2.21899	2.21899	3.07576	2.40775	3.44883	3.96436	2.82448	4.38188	5.61642	2.859	0.408454	2.98035	4.75373	2.65588	2.17193	3.70717	3.93731	2.6151	3.52851
AC009506.1	1.44016e-06	-5.84159	8.66655e-05	-0.701563	2.67961	3.12936	2.81647	2.6944	3.22142	4.46254	3.17557	3.30477	2.58499	2.1377	2.93795	3.44045	3.21345	2.57127	3.82401	3.18704	2.70369	2.37402	2.31978	2.39749	1.01915	0.280216	2.14371	1.66221	2.18059	2.03505	2.03505	2.03505	2.53284	1.9641	3.06926	2.2976	3.04981	2.7776	1.60643	2.06775	3.44855	2.46777	3.24184	1.49374	2.42574	3.18461	1.92129	2.04047	2.36327
TRBV6-1	1.44637e-06	-5.83972	8.66655e-05	1.54064	-0.490836	-1.98546	-0.566887	-1.60869	-3.39983	-2.97541	-3.40099	-1.02133	-1.03081	-2.60266	-1.14274	-4.36345	-1.23007	-2.52283	-1.99324	-2.49011	-1.6529	-1.54073	0.239198	-1.11807	-0.680284	-0.610885	-0.793679	-0.93245	-0.687082	-0.814162	-0.814162	-0.814162	-2.63396	0.53939	-0.0728928	-0.383114	-0.52036	-0.152569	0.953616	-0.270055	-1.79419	-1.96124	-0.332713	-0.109729	0.316786	-2.48436	-0.258862	0.104	-1.2541
PCED1B	1.44799e-06	-5.83923	8.66655e-05	0.745461	5.17436	5.17583	4.89251	4.31324	3.77741	3.24438	3.94871	5.06529	4.16657	4.60311	4.74421	4.2238	5.13874	4.10168	4.38652	5.07449	4.51188	4.88565	5.71005	5.57646	5.30391	5.12829	5.70877	5.25892	4.96805	5.0348	5.0348	5.0348	4.01749	6.15727	5.33538	4.53547	4.78606	5.21813	5.39366	5.61273	5.07441	4.11532	4.51884	5.40828	5.10735	3.94514	5.67181	5.6225	4.7557
H2AC8	1.44987e-06	-5.83867	8.66655e-05	0.902138	4.52469	4.00222	3.99746	4.37281	2.66142	2.6451	3.05275	3.60474	3.77188	3.97946	4.24159	3.49466	3.13586	3.91037	4.11012	3.75567	4.1508	3.78059	5.09256	5.24134	5.17196	3.77242	3.35476	4.84715	4.979	4.39	4.39	4.39	4.29477	5.84004	4.12971	5.40675	4.59676	4.77171	5.16684	3.4166	3.59886	3.46142	4.93165	4.33772	4.09899	4.03377	4.17904	3.78899	4.123
IDO1	1.48275e-06	-5.82893	8.84088e-05	-2.02437	2.22948	6.12374	1.41086	-0.173763	0.519473	-0.0124783	-0.0435068	4.14445	-1.39889	-0.54188	-1.99573	-1.61838	0.366977	3.68976	-0.764075	1.79825	6.15194	3.22877	0.442582	0.0786146	-0.191315	5.28834	1.37517	-1.08575	1.0034	1.99527	1.99527	1.99527	-0.358527	3.58124	0.340826	0.717719	0.132703	-0.83851	0.158066	1.1444	-0.108309	0.12395	-0.512803	2.40355	0.537969	2.74088	-1.05432	-0.474859	0.271354
MRM3	1.50122e-06	-5.82356	8.90727e-05	0.573072	2.18159	1.50381	1.92885	1.80466	1.60838	1.52457	1.05405	1.68732	2.22575	2.11855	1.14074	1.49558	1.69251	1.95378	1.49434	1.8766	1.55819	2.04313	2.81102	1.96166	2.64034	2.68642	2.24949	2.27955	1.95063	2.38211	2.38211	2.38211	1.45894	2.92491	2.44929	1.99952	2.36113	2.20486	2.58504	2.61213	1.92779	1.18248	1.8989	2.56797	2.4034	0.500661	2.64782	2.01251	1.90894
IL32	1.50135e-06	-5.82352	8.90727e-05	0.850758	5.91012	5.00004	5.71901	4.53803	4.0748	3.80271	4.93344	5.9593	5.88833	5.64246	4.23644	4.29171	5.64273	4.70449	5.47083	5.60989	5.26457	5.4794	7.34786	5.27073	5.09965	5.62464	5.57564	5.88643	5.79907	6.03537	6.03537	6.03537	5.41785	7.22067	6.30024	5.73323	6.28876	6.33442	6.53563	5.86842	5.74828	5.16165	4.69526	6.53465	6.26728	4.00482	6.20413	6.28024	5.29623
GPR141	1.51497e-06	-5.8196	8.96576e-05	-0.794655	6.23539	6.61889	5.90522	6.42131	7.00943	7.74614	6.21872	6.50108	5.75631	6.76001	7.93543	7.94328	5.61758	6.07734	6.04939	6.90782	6.7443	6.39912	6.22274	5.79448	5.47699	4.48147	5.51025	5.36812	6.54047	5.70325	5.70325	5.70325	6.21988	5.45937	5.58354	5.82544	4.75441	6.03669	4.77318	5.36408	6.82796	6.52162	6.7113	5.70544	5.25187	6.8683	5.56911	5.47155	6.74568
CDC25B	1.53294e-06	-5.81448	9.04964e-05	0.770835	6.2899	5.67345	6.53232	5.23864	4.79658	4.4366	4.64275	6.08597	5.99813	5.69673	5.30759	5.34752	6.0119	5.63196	5.68481	6.09818	5.57088	5.4679	7.28147	6.62408	6.15579	6.27272	6.39064	6.1081	6.13501	6.44153	6.44153	6.44153	5.3033	7.82846	6.6627	5.8426	6.24007	6.26842	6.33165	6.48139	6.13701	5.38416	5.35435	7.29049	6.55634	4.69001	6.66442	6.86978	5.81502
LINC01550	1.56352e-06	-5.8059	9.20737e-05	0.976976	4.0057	3.66602	3.42642	2.6944	2.88524	1.48462	2.94463	3.79478	2.72384	2.69812	2.6589	1.66274	4.24704	3.0685	3.687	3.58726	3.07049	2.74814	3.51421	4.24494	4.19531	4.35567	4.79991	3.91166	3.73467	4.38231	4.38231	4.38231	3.15079	4.93699	4.72199	3.61094	4.16674	4.21737	4.80953	4.5001	3.44855	2.70124	2.97745	4.01333	4.17348	2.14002	4.60015	4.72103	3.61834
AP001011.1	1.56988e-06	-5.80413	9.22206e-05	-0.628943	3.44111	4.32939	3.94463	3.31001	4.14424	3.85064	4.33543	4.28253	3.36435	3.72472	2.89938	3.30543	3.88025	3.30656	3.6093	4.52476	4.4774	4.0146	3.26884	2.93547	2.30451	1.882	3.68073	2.73361	3.35877	3.16439	3.16439	3.16439	2.82397	3.29893	2.58563	3.06139	3.21395	2.93359	2.49337	3.31579	3.33888	2.84753	3.8618	2.75019	3.00264	4.58833	3.08926	2.8225	3.48738
MSI2	1.5816e-06	-5.8009	9.26808e-05	0.481941	6.23332	5.9695	6.08129	5.42838	5.73658	5.1036	5.61852	5.79759	6.24765	5.86704	5.51102	6.35645	6.18452	5.46175	5.74418	5.84567	5.88061	5.76428	6.45891	6.43622	6.27784	5.83372	6.4087	6.18238	6.13893	6.29359	6.29359	6.29359	6.14042	6.59301	6.23001	5.81832	6.27303	6.24594	6.59441	6.44107	6.43894	5.67031	5.75989	6.34837	6.4923	5.34275	6.67557	6.54276	6.03792
NT5E	1.61086e-06	-5.79294	9.39508e-05	1.26432	2.107	1.4688	2.71689	1.191	0.472248	0.295241	0.263902	-1.02133	1.45881	1.05625	0.736261	-0.184523	0.871246	1.1248	1.1872	0.425131	0.613899	2.06364	1.17154	3.1883	3.0379	1.98756	3.07128	2.29516	1.74011	1.13981	1.13981	1.13981	1.9114	2.18392	3.25795	1.35743	1.94129	2.44024	2.71699	3.00644	0.0109122	1.89811	1.50795	2.40355	3.40803	0.952594	2.59241	1.40788	2.26934
H2BC10	1.61318e-06	-5.79232	9.39508e-05	1.22523	3.12095	2.41989	2.14861	3.28266	0.025704	0.469077	1.41979	2.46059	1.96571	2.36595	1.95962	0.653279	1.10635	2.34067	2.61504	2.11075	2.38817	2.10382	3.37205	4.44017	3.68802	2.31949	1.55098	3.19121	3.42435	3.01326	3.01326	3.01326	2.98641	4.67668	2.87892	4.12803	3.18258	3.23945	3.76489	1.98262	1.58762	1.97654	3.49532	2.94225	1.67151	2.49667	2.8892	2.05424	2.49954
PRMT1	1.61562e-06	-5.79166	9.39508e-05	0.548987	4.18796	4.14211	4.08439	4.17136	2.96417	2.8633	3.34217	3.30477	4.09394	3.79275	3.53252	3.57234	3.78181	4.18859	3.87138	3.49919	3.68325	4.1163	4.44561	4.73378	4.75613	4.36223	3.96432	4.5962	4.43388	4.25053	4.25053	4.25053	3.81901	4.85333	4.21277	4.49774	3.88432	4.26157	4.56629	3.9186	3.44855	3.9759	3.89381	4.5161	4.17348	3.3594	4.28186	4.04153	3.84458
SEC11C	1.624e-06	-5.78941	9.39508e-05	0.783428	3.07209	1.94697	3.15767	2.08349	1.93879	1.67413	1.88336	2.16652	2.63704	2.7857	2.59597	2.51842	2.82034	2.49307	2.21434	2.56968	2.252	1.89072	3.16728	4.06323	3.70005	2.7677	2.4403	3.2078	2.67674	3.40604	3.40604	3.40604	2.41603	3.22035	2.85213	3.40899	3.29686	3.53469	3.52363	3.03843	2.79108	2.33515	3.3709	3.30279	2.90266	1.80604	3.35648	2.8622	2.75853
DCAF13	1.62587e-06	-5.78892	9.39508e-05	0.544293	3.53717	3.09533	3.52131	2.17556	2.52923	2.7996	2.65906	2.91351	3.65683	2.9786	3.235	2.88601	3.51526	3.52663	2.88937	3.13485	2.99936	3.16374	3.38032	3.84614	3.94207	3.83032	3.80985	3.288	2.85855	4.07401	4.07401	4.07401	3.19577	4.28352	3.61207	3.11553	3.81441	3.36869	3.50289	4.16066	3.04965	3.33812	2.97745	3.8365	3.72413	2.20253	3.7932	3.74295	3.38232
WDR76	1.6269e-06	-5.78864	9.39508e-05	0.729664	3.29275	2.6086	2.93939	3.01	1.63006	1.48462	2.05318	2.85146	2.48912	2.56298	2.77707	2.75889	2.77557	3.12144	3.00311	3.18704	2.54624	1.89072	3.78123	3.8644	3.49902	3.68097	2.6201	3.41489	2.78056	3.47032	3.47032	3.47032	2.70453	4.85133	3.33736	3.28455	3.27471	3.33014	3.25253	3.34166	2.72286	2.90214	3.30441	3.81757	2.76928	2.4459	3.55794	3.34934	2.88155
AC040970.1	1.6314e-06	-5.78744	9.39828e-05	-0.836366	3.70243	3.74129	4.42315	4.7674	4.65573	5.06687	4.82503	4.02585	3.22676	3.93637	4.22089	3.55543	3.68223	4.29842	3.65643	4.93802	4.50334	4.5893	3.52917	2.39749	3.48519	2.93538	3.18991	2.87535	4.18795	3.29027	3.29027	3.29027	3.8643	2.76373	3.2982	3.08871	2.62889	4.48198	1.28053	3.88966	2.87206	3.70355	3.43445	2.84408	2.09039	3.52348	1.98004	3.36601	3.3301
LCK	1.65194e-06	-5.782	9.47068e-05	0.81444	5.55215	4.65938	5.63663	3.95457	4.20688	3.85064	4.33872	5.4389	5.27961	5.31458	4.40653	4.56939	5.2266	4.43435	4.86899	5.23677	4.96815	4.7996	6.55709	5.60389	5.54858	5.79789	5.9146	5.39554	5.03885	5.65832	5.65832	5.65832	4.67437	6.88521	5.89154	5.37659	5.51731	5.51948	5.92106	5.95197	5.75042	4.37382	4.30767	6.31211	6.02819	3.58734	6.25036	6.1825	5.13817
H3C3	1.65532e-06	-5.78112	9.47068e-05	1.31295	4.92086	4.14211	3.92493	4.42376	0.609523	2.12756	3.13073	4.0032	3.02667	3.71837	4.01982	3.57234	2.78689	4.72516	4.14357	4.33429	4.06631	3.70424	5.42011	5.88222	5.698	3.82558	2.40148	5.32124	5.32301	4.93845	4.93845	4.93845	4.79037	6.58579	5.0175	5.89093	5.41305	5.28767	5.8774	3.4166	2.55645	4.10953	5.53482	4.70605	3.75974	4.24651	4.63713	3.77242	4.02786
AC243960.1	1.65588e-06	-5.78097	9.47068e-05	0.820835	4.19033	3.29839	3.81149	2.11484	2.48233	2.62687	2.53836	3.69937	3.80638	3.46906	3.45486	4.5567	4.21805	2.93291	3.93008	3.56377	3.25484	3.15421	4.229	4.5027	4.84728	4.02057	4.36148	4.24476	3.39193	4.59907	4.59907	4.59907	3.18689	4.72127	4.50987	3.65274	4.80679	4.48198	4.7904	4.81527	3.95165	3.01792	3.08434	4.35095	4.16687	2.09678	4.55012	4.68163	3.69776
AC090907.3	1.66583e-06	-5.77837	9.50481e-05	-0.906402	1.40862	3.02478	2.24709	1.84261	2.07146	1.9335	2.17597	2.0608	-0.104251	2.7857	1.14074	0.588286	1.93574	0.576191	1.14377	3.11344	2.35055	1.64059	0.675634	0.508265	0.463973	0.708464	0.790357	1.92556	1.3114	0.751345	0.751345	0.751345	1.65209	-0.165778	0.577266	0.752303	0.883425	1.4531	-0.0106416	0.88769	1.03317	1.34897	2.35812	0.347906	0.496362	2.14002	1.17162	0.898486	1.94411
ANKRD46	1.67221e-06	-5.77671	9.51841e-05	0.522693	2.83774	1.99697	2.91962	1.84261	2.33172	2.29858	2.02078	2.22642	2.88318	2.46024	2.19013	2.39083	2.56807	2.63091	2.41034	2.70468	1.95896	2.16206	2.82321	3.11394	3.24363	3.10135	3.13576	3.03262	2.25457	2.97968	2.97968	2.97968	2.66669	3.38459	2.96478	2.5346	3.15052	3.15375	3.21475	3.36707	2.74022	2.80518	2.29104	3.12937	2.97261	1.95872	3.35092	3.19624	2.67726
H3C8	1.68746e-06	-5.77277	9.56921e-05	1.3687	4.69723	3.37602	3.29446	4.15637	0.734863	2.93915	2.90079	3.82092	3.04605	3.96345	3.92059	3.26442	2.61965	4.23738	3.99873	3.55585	3.76415	2.86963	4.49217	5.72124	5.47466	3.81606	1.84901	5.05856	5.17654	4.86862	4.86862	4.86862	4.13302	6.38496	4.74644	5.72563	5.53294	4.92022	5.50478	3.24445	2.09903	3.54958	5.48616	4.5817	3.35081	4.2013	4.26128	3.21476	4.06826
TEX10	1.68916e-06	-5.77233	9.56921e-05	0.495214	4.18644	3.68901	3.96407	3.5119	3.50566	3.58386	3.19748	3.74786	4.24414	4.19132	3.235	3.97323	4.25114	3.95772	3.94913	3.50742	3.27506	4.04587	4.36866	4.43407	4.39348	4.19966	4.35472	4.06522	3.56476	4.34587	4.34587	4.34587	3.88642	5.01428	4.33389	3.86514	4.3649	4.15808	4.04511	4.37624	4.03841	3.75637	4.05211	4.39359	4.37919	2.96178	4.39684	4.36537	4.11144
SFXN2	1.70076e-06	-5.76936	9.61213e-05	0.677983	3.07092	2.4914	2.7283	2.63076	2.19296	1.31276	2.468	2.08258	2.67488	2.39807	1.88262	2.66745	3.17948	2.67407	3.03911	2.55387	2.05562	2.67002	3.11864	3.32642	3.5442	3.62753	3.10388	2.94628	2.66593	2.83694	2.83694	2.83694	2.38529	3.80901	3.44883	3.32532	3.23704	3.08596	3.43333	3.20741	3.0635	3.10196	2.80543	3.29107	3.32727	1.93437	3.42152	3.58585	2.4757
ARMC1	1.70942e-06	-5.76715	9.63822e-05	0.491109	4.11459	3.44968	3.98324	3.12223	3.43968	3.71911	3.06074	3.62713	4.09394	3.54991	3.73592	3.67763	4.26335	3.68273	3.76073	3.89396	3.76415	3.87647	4.13919	4.14765	4.41553	4.51422	4.44655	4.18736	3.48093	4.50306	4.50306	4.50306	3.57524	4.80029	3.93923	3.90795	4.16273	4.05253	4.33352	4.4613	4.13344	3.15913	3.94271	4.49412	3.99826	3.17425	4.46527	3.99586	3.75829
LINC01093	1.71427e-06	-5.76592	9.6428e-05	-1.809	3.25765	4.20727	2.6222	5.02424	5.18682	5.23581	2.97877	4.25404	0.131732	5.77373	2.8463	-1.61838	3.16219	5.6804	2.4643	5.8746	2.70369	4.17405	4.67821	1.74226	1.866	1.38589	3.06301	4.15351	3.76536	0.5464	0.5464	0.5464	2.09359	-1.15218	3.61738	0.752303	2.06686	3.58875	-0.885928	1.96053	2.59512	2.76155	2.39693	0.347906	-0.127599	3.74966	1.48731	1.99833	4.36928
BX284613.2	1.71918e-06	-5.76468	9.64765e-05	-1.79968	-0.572863	-2.43793	-3.31059	-0.719728	0.025704	-0.261442	-0.52745	-1.2202	-1.39889	-1.33373	-3.1082	3.90814	-1.23007	0.31042	-0.764075	-2.04276	-0.943233	-4.36345	-4.36345	-2.8348	-0.191315	1.7076	-1.79229	-1.45203	-0.802391	-2.34228	-2.34228	-2.34228	-0.466535	-4.36345	-2.12651	0.221296	-0.627484	-0.83851	-0.135177	-0.918616	-1.15788	1.18248	-2.0896	-3.29613	-1.40057	-1.41933	0.100166	-0.832218	-2.09592
H3C12	1.73302e-06	-5.7612	9.68037e-05	1.285	5.06819	3.98993	3.89487	4.6546	2.2778	2.96841	3.24032	4.19529	3.30123	4.29305	4.40653	3.51229	2.74105	4.92898	4.31978	3.94334	4.29637	3.28227	5.07991	6.15399	5.68797	3.95268	2.47809	5.36997	5.27048	5.32422	5.32422	5.32422	4.87854	6.39463	5.12956	6.07979	5.69316	5.66209	6.17163	3.57038	3.32744	4.06834	5.79784	4.80275	3.78155	4.55278	4.99322	3.62791	4.33657
GPR55	1.73313e-06	-5.76117	9.68037e-05	1.02265	1.6864	-0.101032	0.947144	1.55328	1.17909	-0.740452	1.17676	0.816775	0.767046	0.468006	-0.222267	0.448795	1.27667	1.48945	1.05278	0.791546	0.0825738	0.715704	0.310227	2.19597	1.5665	2.69683	1.88697	1.48298	1.39229	2.48144	2.48144	2.48144	0.595828	2.90185	1.68082	1.4446	2.25956	1.3795	2.4398	1.9381	0.788143	2.44955	0.707246	3.26735	2.15866	-0.988481	1.38232	1.95493	0.378077
DTD2	1.74459e-06	-5.75831	9.72162e-05	0.658625	2.31633	0.913901	1.98701	1.191	1.39706	1.40125	1.14705	1.84849	2.43134	1.81974	2.03272	1.94822	2.41592	1.6129	1.77616	1.50127	1.77245	1.23303	1.83308	2.5963	2.01466	2.69683	2.76983	2.47039	1.51778	3.03957	3.03957	3.03957	1.77576	2.9476	2.41309	2.28584	2.82448	2.68898	2.4398	2.4312	2.2997	1.84335	1.59952	2.6063	2.43678	0.500661	2.61111	2.73968	1.71896
IL1R2	1.80248e-06	-5.74413	0.000100208	-1.70911	8.06701	8.41902	5.86055	10.3126	9.32377	9.30011	10.0287	8.21745	6.63925	9.18717	10.5581	10.8964	7.07394	7.17148	9.03887	7.36221	7.77979	9.8191	5.96105	6.62876	5.95881	5.93065	6.41033	6.52205	8.48755	5.90279	5.90279	5.90279	7.74074	3.88544	5.79052	7.56296	5.47747	6.95298	4.36547	4.86962	8.13093	7.75197	7.74896	3.4887	5.90342	10.6306	5.65613	5.06854	7.81587
UTP20	1.82419e-06	-5.73893	0.000101179	0.583119	4.34695	4.10269	4.37314	3.31001	3.73303	2.8633	3.43116	3.80791	4.13976	4.07693	3.87494	3.83998	4.1095	3.85518	4.14908	3.91886	3.51495	3.79293	4.70481	4.89345	4.38357	4.65972	4.59728	4.26868	3.8053	4.21345	4.21345	4.21345	3.45457	5.46593	4.54931	3.82915	4.38571	4.34369	4.25506	4.84873	4.2102	3.77112	4.06019	4.82595	4.5234	3.06633	4.80699	4.66826	3.82584
GPR174	1.8314e-06	-5.73722	0.000101343	0.873996	5.63596	4.55893	5.58578	3.21194	3.99351	4.38328	3.90943	5.33842	5.42918	5.31458	4.70375	4.94203	5.41901	4.2083	4.97501	5.31389	5.04669	4.10149	6.20654	5.64143	5.5684	5.10502	5.92604	5.96904	4.85367	6.10165	6.10165	6.10165	4.8563	6.34563	5.75962	5.00756	6.65512	5.89037	5.89044	6.66249	6.18851	4.39777	4.13479	6.49476	5.75033	3.38658	6.46931	6.38819	5.09775
TLR2	1.83597e-06	-5.73613	0.000101361	-0.815416	9.37069	10.009	9.00454	10.2933	10.414	10.157	10.9493	10.0745	9.09215	9.72158	10.2206	9.89328	9.36071	9.39188	9.83543	10.0555	9.85094	10.7762	9.18298	9.04034	8.35275	7.48173	9.32463	9.22599	9.15988	9.07087	9.07087	9.07087	9.29932	8.22586	8.605	9.1335	8.64672	8.77436	7.78925	8.49119	9.12173	8.92414	9.79151	8.15901	7.86676	10.8742	8.58817	8.28432	9.76591
H2AC14	1.84266e-06	-5.73456	0.000101495	1.50681	1.1571	-0.210259	-0.459418	-0.029688	-2.82721	-1.17978	0.469953	0.397675	-1.62542	-0.316656	1.00201	-0.730199	-0.765681	0.449417	0.0861709	-0.0672424	-0.0122418	-0.2935	1.13288	2.10676	1.47613	-0.097601	-1.20825	1.48298	1.2834	0.686212	0.686212	0.686212	0.929912	2.95509	1.23208	2.58344	1.6744	1.19874	2.08247	0.0135706	-0.238277	-0.300308	1.48412	0.786686	-0.77311	-0.0597428	0.626856	0.0500223	0.428617
TRAJ11	1.91215e-06	-5.71848	0.00010508	1.11773	1.23603	0.000503456	0.947144	-0.95986	-0.0412469	-1.46255	-0.973023	0.917121	0.983542	0.742722	-0.469041	0.294359	1.30845	-0.706112	0.338159	0.0273895	0.17154	-0.518974	1.75885	1.01266	1.49467	0.826972	1.40163	0.923952	0.0710817	1.80897	1.80897	1.80897	-0.0759148	1.97886	1.94021	0.570443	1.58126	1.63804	1.48476	2.06775	1.46769	0.213034	-0.612047	1.49374	1.88001	-1.18788	1.95097	1.92525	0.428617
MCCC2	1.94908e-06	-5.71017	0.000106778	0.591188	4.47403	4.10269	4.44407	3.76997	3.69753	3.41348	3.45561	3.65646	4.67909	4.20954	3.46369	3.96044	4.32291	4.12779	3.95543	4.07656	3.66038	4.42062	4.76926	4.846	4.47973	4.76491	4.95315	4.55465	3.93246	4.79908	4.79908	4.79908	4.1097	5.5732	4.32417	3.76708	4.33668	4.4328	4.81375	4.8427	4.03841	3.82863	4.12711	4.91645	4.67562	3.11047	4.73845	4.8976	3.76322
EARS2	1.95199e-06	-5.70952	0.000106778	0.552546	3.28834	3.02478	3.00654	2.47035	2.64021	2.3661	2.39404	2.82587	3.30927	3.22232	1.77311	2.60311	3.22182	3.1825	2.88937	3.05847	2.36948	2.70961	3.54399	3.8644	3.62212	3.78712	3.30655	3.16596	2.93255	3.44101	3.44101	3.44101	2.72923	3.81314	3.47247	3.23038	3.17463	3.48292	3.77358	3.57765	3.30428	2.84753	2.66412	3.68654	3.37397	2.26244	3.72184	3.54253	3.06846
SRP72	1.97457e-06	-5.70453	0.000107765	0.538562	5.25999	4.62402	4.96182	4.35322	4.36714	4.59507	3.905	4.49632	5.53241	4.81124	5.05323	4.83753	5.11197	5.08105	5.07089	4.85336	4.6304	5.27466	5.28337	5.83902	5.37691	5.16438	5.52988	5.25094	4.83691	5.73379	5.73379	5.73379	5.0911	5.9434	5.15536	5.12438	5.22569	5.06955	5.29605	5.44188	4.67482	4.48084	4.99204	5.64227	5.40025	4.24156	5.41926	5.00789	4.86066
OXNAD1	1.9982e-06	-5.69936	0.000108694	0.839771	5.21753	5.1622	4.43365	3.98033	3.89846	3.06638	4.17168	4.83457	4.36866	4.37602	4.42022	4.1469	5.42446	4.3167	4.96257	4.91654	4.13429	4.96141	5.1805	5.76806	5.70895	5.29692	5.78866	4.68182	4.62173	5.38833	5.38833	5.38833	4.42138	6.07205	5.46626	4.56251	4.9464	5.12831	5.57727	5.21576	4.94565	3.68809	4.66113	5.10116	5.26122	3.79769	5.7976	5.64201	5.01127
EIF4G3	2.0007e-06	-5.69882	0.000108694	-0.607925	7.67964	9.02214	8.00834	7.62521	8.00164	8.12271	6.97094	8.46364	7.30866	7.90508	8.82493	8.37731	7.41596	7.50457	7.8378	8.35517	8.7542	8.48303	7.99329	7.50582	6.90382	6.78389	7.45918	7.40332	7.65041	7.09997	7.09997	7.09997	7.82011	7.30987	6.97508	7.12946	6.97362	7.11587	6.49943	7.26423	7.87016	7.68055	7.7817	7.41066	7.32925	8.78346	7.35457	7.12156	8.00989
LINC02325	2.01546e-06	-5.69563	0.000109084	0.793109	3.21104	2.52587	2.93939	1.30411	2.72324	1.48462	2.66955	2.6764	2.6242	2.39807	2.44347	1.04103	3.23014	2.8475	2.73696	2.77456	2.59531	2.27193	3.20504	3.09087	3.49442	3.5377	3.39483	3.34161	2.43087	3.59088	3.59088	3.59088	2.32177	4.21034	3.50723	2.66739	3.88919	3.76166	3.85359	3.86609	3.20775	2.58922	2.88037	3.38226	3.25426	1.47568	3.92987	3.5474	2.6562
MLKL	2.02188e-06	-5.69425	0.000109084	-0.735649	6.69486	7.99773	6.72406	7.09613	7.11985	7.79544	6.71151	7.95108	5.81679	6.62489	7.31788	7.41519	6.28976	6.99265	7.17692	7.57004	7.57182	7.93876	6.08142	6.19334	6.20374	4.93949	6.15428	6.22375	6.71244	6.6459	6.6459	6.6459	6.52585	6.61857	5.97874	5.8812	6.19559	6.01179	4.65593	6.22759	7.21931	6.49745	6.91663	6.03371	5.66957	7.67437	6.09289	5.42061	7.11225
FAR2	2.02526e-06	-5.69352	0.000109084	-0.723123	6.06307	6.31942	6.19566	5.50433	6.15815	6.89004	6.96616	7.2952	6.21271	6.1082	7.22411	6.86857	6.07446	5.54162	6.13783	7.3114	7.05682	6.42015	5.34175	5.81575	4.83642	4.21061	5.65753	5.32695	5.62589	5.59208	5.59208	5.59208	6.19351	5.99606	5.34181	5.36266	5.41642	5.51948	5.08547	5.70862	5.91806	6.17183	6.51728	4.98836	6.20487	7.42357	5.0713	4.51731	6.21213
DCLRE1A	2.02967e-06	-5.69258	0.000109084	0.572603	3.0228	1.43292	3.22366	2.08349	2.17832	2.38792	1.67012	2.40983	2.9971	2.49035	2.49612	3.2222	2.60692	2.50905	2.6465	2.90491	2.23145	2.68334	2.95095	3.25902	2.97329	3.5945	3.07128	3.27231	2.62188	3.74675	3.74675	3.74675	2.51875	3.78401	2.61779	2.89338	3.38217	3.49167	2.93398	3.20741	3.07723	2.53842	2.80543	3.74211	3.04654	2.49667	3.47356	3.22697	3.10776
CEP128	2.03075e-06	-5.69234	0.000109084	0.706826	3.28976	2.36383	2.69379	2.65228	1.97312	2.32144	2.47997	2.10402	3.15717	2.77351	3.25551	2.81677	2.64476	3.03578	3.02721	2.55387	2.65823	1.7459	3.65047	4.5172	3.11778	3.29199	2.69691	3.35656	3.02	3.37538	3.37538	3.37538	3.16895	3.80487	3.22353	3.1931	3.60558	3.60499	3.27717	3.45661	2.72286	2.74671	3.81481	3.25935	3.03931	2.90025	3.62851	3.32682	2.76837
SETMAR	2.03952e-06	-5.69047	0.000109309	0.54533	2.10435	1.2388	1.76123	1.24866	1.47099	1.52457	1.02167	1.74307	1.83811	1.95544	2.14688	0.940459	1.64352	2.0443	2.03578	1.53388	1.49064	2.04313	2.33689	2.01167	2.7369	2.22192	2.45301	2.14819	1.49354	2.20744	2.20744	2.20744	1.79927	2.75518	2.10053	1.95568	2.21375	1.93633	2.55513	2.53948	1.62548	2.16696	1.72682	2.42516	2.4694	1.0003	2.35778	2.19768	2.01197
LGSN	2.07786e-06	-5.68238	0.000111114	-1.84415	1.01847	0.422519	1.78328	0.332218	0.812755	1.90352	-0.733103	3.0189	-2.22498	-0.54188	1.09596	-0.0751855	2.97686	-0.211215	0.0861709	5.31624	-3.10859	2.5296	-1.80165	-0.0522671	-0.0774376	1.00512	1.07978	-0.162117	-0.387901	0.5464	0.5464	0.5464	0.648557	-4.36345	2.00649	0.608696	-1.74638	-0.524103	-0.780448	1.39557	0.0109122	0.943074	1.64321	-1.07593	-0.87864	-1.41933	1.0671	-2.02373	-1.2541
DDAH2	2.08771e-06	-5.68033	0.000111391	-0.729218	5.00539	5.06886	5.5347	6.0699	5.36059	6.00712	5.21161	5.95193	4.00266	5.6188	6.15943	5.71025	4.87256	4.95838	5.76225	5.75524	5.33367	5.43482	4.96905	4.64415	4.43485	3.47858	4.54184	5.13211	5.23437	4.41031	4.41031	4.41031	5.03279	4.04479	4.80115	4.75814	4.29695	5.12409	3.68887	4.55642	5.79471	5.56637	5.23449	4.15584	3.75533	5.76313	4.38057	4.31477	5.76181
UNG	2.0992e-06	-5.67795	0.000111754	0.634343	2.42155	1.94697	2.49436	1.68444	1.58637	0.695928	1.36921	1.77015	2.06405	1.91161	1.59148	1.84071	2.08998	2.06607	1.52852	2.45519	2.168	1.30372	2.99474	2.82793	2.81271	2.91768	2.38831	2.37077	2.40511	2.63602	2.63602	2.63602	1.75186	3.58124	2.60715	2.42096	2.36113	2.44024	2.7873	2.39871	1.66237	2.41242	2.20618	2.94225	2.5731	1.54165	2.8892	2.73113	1.94411
LINC00342	2.10544e-06	-5.67666	0.000111837	0.717423	5.22769	4.45096	5.12396	3.48815	3.92501	3.87402	4.24364	4.82491	4.95762	4.9931	4.22609	4.58613	5.531	4.48371	4.72905	4.86942	4.38275	4.00402	5.30092	5.21846	5.57712	4.611	5.46391	5.44185	4.80772	5.59984	5.59984	5.59984	4.41379	5.94809	5.43802	4.53795	5.81579	5.11844	5.67902	5.86546	5.45166	4.18854	4.41869	5.444	5.31606	3.59513	5.89146	5.82691	4.75074
PRPF19	2.12264e-06	-5.67312	0.000112491	0.511968	4.95141	4.76776	4.88233	4.31324	4.28412	3.87402	4.03236	4.30586	5.08254	4.71252	4.46932	4.2238	4.63946	4.75563	4.33434	4.8174	4.40586	5.13624	5.35441	5.27756	4.91764	5.06136	5.32043	4.78493	4.86788	5.14343	5.14343	5.14343	4.54474	5.83599	4.92414	5.02357	4.19846	4.7353	5.01213	5.01604	4.25315	4.31968	4.70302	5.47454	5.28737	3.75662	5.11783	5.2244	4.57118
MAGEH1	2.12719e-06	-5.67219	0.000112491	0.711162	1.69628	0.68903	1.29286	1.35751	0.423425	0.0975504	1.05405	0.917121	1.57009	1.17223	0.901504	0.887415	1.429	1.1657	1.52852	0.679439	1.45564	1.37111	1.99275	2.45886	2.02744	1.68686	2.01249	1.79989	1.74011	1.77804	1.77804	1.77804	1.72755	1.8402	2.21709	1.35743	2.21375	2.17254	2.06842	1.29323	1.24257	0.296936	1.57717	2.306	1.69008	0.500661	2.28973	1.69844	1.59167
C5orf63	2.14168e-06	-5.66924	0.00011283	0.704542	2.84134	2.15947	2.65844	1.191	1.63006	1.8729	2.06911	1.53774	2.61125	2.61856	1.74438	2.72905	2.54157	2.50905	2.23519	2.76085	1.93375	2.3575	3.58753	3.02746	3.19347	2.42347	2.81976	3.09638	1.89619	3.02648	3.02648	3.02648	2.28893	3.27521	2.77817	2.72075	3.28213	3.23424	3.52877	3.74208	2.90322	2.68576	2.05263	3.03416	2.88665	1.47568	3.20462	3.62791	2.56877
KCNA3	2.15306e-06	-5.66694	0.00011283	0.635798	5.86813	5.58222	6.11645	4.41119	4.89163	4.23467	4.72801	5.42831	5.24439	5.59128	5.53428	5.31525	5.62233	5.11538	5.27841	5.72025	5.46046	4.91135	6.35985	6.09626	5.4653	5.72089	6.07531	5.62131	5.56468	6.0828	6.0828	6.0828	5.01783	6.43132	6.54428	5.72454	6.42401	6.12238	6.35499	6.40062	5.65526	4.39777	5.54493	6.45593	5.64479	4.59611	6.34699	6.21888	5.40751
ACSL3	2.15433e-06	-5.66669	0.00011283	-0.65379	5.93429	6.44744	5.95464	6.13059	6.37906	7.48275	5.58567	6.51716	5.39746	5.90805	7.37464	6.25279	5.95154	6.08668	6.63792	6.52349	6.48049	7.23255	5.53206	5.47317	5.39552	5.4183	6.04834	5.56769	5.76276	5.77353	5.77353	5.77353	5.84524	5.82582	5.5183	5.12768	5.297	5.37784	4.57873	5.71524	6.65112	5.72055	5.90941	5.45279	5.11767	6.85944	5.44295	5.37057	6.17837
PPARG	2.15807e-06	-5.66593	0.00011283	-0.982258	2.39053	0.965039	2.39762	3.35008	3.51734	2.68089	2.87383	2.24584	2.08294	3.77451	3.03603	2.66745	1.45762	4.67646	3.74629	3.30507	2.36948	2.37402	1.97099	1.76188	1.98874	1.97049	1.76995	2.75634	2.08648	1.83924	1.83924	1.83924	2.47562	-0.711955	2.49618	2.13674	1.557	1.52312	1.52646	0.840086	2.82402	2.09846	3.03599	2.78403	1.21332	1.17674	2.13027	0.770818	2.76837
NT5C2	2.16225e-06	-5.66509	0.00011283	-0.574057	7.86907	8.38832	8.09408	8.10029	8.29883	8.53483	7.81668	8.67119	7.62889	7.96695	8.51047	8.27616	7.99409	7.82931	8.47439	8.89332	8.72119	8.53147	7.78504	7.44418	7.21484	6.11472	7.70545	7.49446	7.89094	7.49887	7.49887	7.49887	7.79218	7.3973	7.29483	7.49215	7.02758	7.60312	6.43108	7.39558	8.00508	7.91269	8.22277	6.99966	7.43179	8.55498	7.34097	7.35962	8.33476
AL365361.1	2.16429e-06	-5.66469	0.00011283	0.658922	4.72928	4.11972	4.92262	3.2964	3.79191	3.38121	3.41255	4.51245	4.33754	4.09173	4.50401	4.13557	4.3575	3.61789	4.30013	4.37084	4.59866	3.73014	5.15419	5.07296	4.54564	4.55199	5.15721	4.65787	4.24352	5.12358	5.12358	5.12358	3.67393	5.44747	5.29285	4.23584	5.2915	4.83158	4.60817	5.33432	4.75813	2.99298	4.40606	5.39739	4.53885	3.35023	5.29315	5.2244	4.47826
IGKV1-6	2.16986e-06	-5.66357	0.00011283	2.49113	3.01949	0.268194	1.86825	2.01867	-3.39983	0.891907	0.732554	-2.06551	1.0618	1.91161	0.793471	0.0264459	0.53757	0.800535	-0.219345	-1.4262	1.26664	2.76076	6.69286	1.68177	2.98645	-0.171443	-0.291587	2.63891	1.98581	0.218105	0.218105	0.218105	0.648557	0.654222	3.17392	3.04753	1.88394	3.23945	3.47653	1.74484	-0.108309	5.34774	4.56501	1.96615	0.991681	0.952594	1.26908	1.12423	3.48141
IGHEP2	2.17144e-06	-5.66325	0.00011283	-0.609011	3.84911	5.27289	3.91997	3.85598	4.12146	4.69034	3.7206	4.38684	3.34883	4.06697	4.07854	4.38556	3.79869	4.45099	4.53678	4.38431	4.70308	4.96958	3.32994	3.55158	3.2491	3.16273	3.4274	3.288	3.81022	3.59533	3.59533	3.59533	4.15597	3.86174	3.31137	3.927	4.01473	3.37344	3.40566	3.58489	3.81906	3.53237	3.88018	3.32211	2.87045	4.91824	3.33975	3.15848	4.03603
MDK	2.22821e-06	-5.65204	0.000115528	-1.07965	2.22188	2.8724	3.78987	3.47613	2.71312	2.22776	1.05405	3.9568	-0.104251	2.85677	-0.766917	1.13505	3.63288	3.15229	2.44654	3.86222	3.75698	2.08387	2.78632	1.33419	1.98874	2.97869	2.55084	2.02253	1.6983	1.42574	1.42574	1.42574	0.971898	1.22426	2.68004	0.786078	2.6747	2.02347	1.99604	3.32447	-0.381123	2.65429	1.78649	2.0427	0.217855	3.27465	1.92129	1.51137	1.87289
RAN	2.24524e-06	-5.64874	0.000115912	0.539102	5.25909	4.63195	5.21599	4.57231	4.13668	4.54739	3.8181	4.67175	5.06602	4.80227	5.23974	4.39033	4.76787	5.34196	5.23509	4.9441	4.77937	4.96686	5.56692	5.65066	5.65539	5.31731	5.30649	5.11242	5.17082	5.6615	5.6615	5.6615	5.01783	6.33562	5.53384	5.50001	5.15674	5.36359	5.72004	5.18513	4.77928	4.44451	5.12703	5.62526	4.9867	4.36512	5.21428	4.9241	4.95419
AL049776.1	2.24534e-06	-5.64872	0.000115912	-0.634552	1.49949	1.66713	1.38225	1.55328	1.37154	2.20335	1.90127	2.47713	1.30642	1.64339	2.73388	1.97389	1.30845	1.9063	2.56652	2.21496	1.88196	2.1235	0.675634	1.38567	0.705845	-0.24927	1.04662	1.24652	1.1656	0.902369	0.902369	0.902369	1.99522	1.43167	0.119093	1.24048	1.45567	1.04061	0.68558	1.02175	1.73344	1.26812	1.62153	0.435678	1.76207	1.66517	1.17162	1.71587	1.54662
MPI	2.25052e-06	-5.64772	0.000115928	0.603691	3.80479	3.19509	3.92493	3.36319	3.11783	2.29858	3.10777	3.09585	3.48286	3.36727	2.7192	3.2222	3.96743	3.31567	3.22772	3.51561	3.09344	3.47073	3.86619	4.02722	4.07731	4.17753	4.27465	3.81209	3.44977	3.74275	3.74275	3.74275	3.32288	4.38401	3.97691	3.6573	3.96489	3.6643	4.23003	4.31227	3.45908	3.11358	3.1001	4.33392	4.00939	2.16115	4.18529	4.30328	3.32344
AL392172.2	2.28396e-06	-5.64131	0.000117072	-1.40263	-0.387122	0.0953606	-0.265875	0.332218	0.266184	0.695928	0.517174	-2.06551	-0.876886	-0.669215	-2.4473	3.34532	-1.05812	0.635631	-0.939815	-1.4262	-1.6529	-2.14778	-3.20893	-0.981364	-0.0237012	0.666694	-1.05644	-0.93245	-2.38298	-0.147001	-0.147001	-0.147001	-1.17657	-2.56498	0.0578933	-0.719802	-0.743205	-0.929121	-1.25843	0.321545	-1.79419	1.26812	-1.41611	-1.55085	-2.53612	-0.988481	0.954404	-0.324684	-2.41439
AC012150.2	2.28713e-06	-5.64071	0.000117072	-1.65852	0.861026	1.92131	-1.69143	-4.36345	0.320525	1.77693	2.45593	1.18205	1.09939	-0.963545	3.28573	4.62715	-0.639052	-1.73975	-0.110158	0.844493	2.18946	1.30372	-0.506746	0.198604	-1.29249	-2.0886	-0.472029	-1.67722	-1.38626	-1.3847	-1.3847	-1.3847	1.84517	-0.533733	-2.44298	-0.541658	-0.52036	-1.2411	-1.40754	-0.495778	-0.108309	0.451383	0.578128	-1.34179	0.991681	2.91276	-1.31184	-2.27611	0.378077
TRAV22	2.28745e-06	-5.64065	0.000117072	1.32036	-0.136373	-1.36402	-0.809305	-4.36345	-1.61904	-2.28127	-4.36345	-0.690726	-1.39889	-1.1368	-1.37515	-2.4178	-0.904505	-1.23501	-0.110158	-0.664443	-1.14334	-2.58525	-0.774291	-0.196218	0.126451	0.0396289	-0.919084	-0.551248	-1.06499	0.020894	0.020894	0.020894	-0.466535	1.14793	0.702517	-0.923083	-0.420644	0.00255814	0.356117	-0.270055	-1.44124	-1.10459	-0.958773	0.873068	-0.127599	-1.41933	0.430183	-0.1252	-1.61446
U91328.1	2.29653e-06	-5.63893	0.000117285	-0.770066	4.62237	4.78209	5.45109	5.03247	5.5069	4.77971	4.63475	6.11531	3.4174	4.99046	3.95234	4.85836	4.58211	5.18169	5.48177	6.43347	5.18132	5.21401	4.82186	4.22741	3.63053	2.82578	4.78239	4.11445	4.17277	4.70151	4.70151	4.70151	3.71777	3.53204	4.44263	3.43584	3.98776	4.60413	3.4388	4.69666	4.25315	5.19757	4.60974	3.33739	3.61659	5.8174	4.39144	4.04843	4.42946
PRKCQ	2.33691e-06	-5.63136	0.000119092	0.749798	4.77553	3.88098	4.68857	3.01	3.64527	3.37029	3.59968	4.3912	4.48329	4.76888	3.82779	3.46781	4.81565	3.99224	3.7892	4.83058	4.16712	4.12609	5.77269	4.45831	4.70533	4.69651	5.15527	4.86817	4.39515	5.04296	5.04296	5.04296	3.93499	5.78544	4.89381	4.14114	4.92996	4.71487	4.93292	5.42786	5.06411	3.90415	3.5708	5.39192	5.01091	2.93748	5.46754	5.42592	4.46622
NSUN7	2.35217e-06	-5.62853	0.000119614	-1.24952	4.88089	5.66381	2.73962	6.89074	5.49069	6.89099	6.3045	4.87879	3.47574	6.02322	6.85572	6.31437	4.84032	2.95641	6.20672	4.29678	4.5246	4.91418	4.74703	4.20251	3.9285	2.54372	3.69685	4.51187	5.05551	2.53791	2.53791	2.53791	4.5131	3.11066	5.0493	4.26906	3.34724	4.7771	2.31445	2.5245	5.4855	4.97686	5.24162	2.41079	3.28513	5.43677	3.29995	3.84554	6.1142
ZC3H3	2.37527e-06	-5.62429	0.000120532	-0.583362	6.21801	7.83502	6.29012	6.74057	6.39498	6.89481	6.1743	7.44032	5.77675	6.71051	6.7504	6.57453	6.03701	6.43401	6.23933	6.19055	6.52549	7.42272	6.87521	6.09819	5.72179	5.26228	5.9509	6.36912	6.55078	5.66362	5.66362	5.66362	6.22097	5.72761	5.61707	6.17209	5.46449	6.04862	5.59575	5.6751	6.26546	6.13097	6.13371	5.63843	5.64598	6.90244	5.66623	5.76857	6.61197
FAM171A1	2.38503e-06	-5.62251	0.000120771	0.873966	1.51809	1.01443	1.38225	0.934088	0.472248	-0.0124783	1.05405	0.964793	-0.192346	0.839462	-0.113093	-1.34015	1.33954	1.6129	1.05278	0.425131	0.409608	0.766647	2.31978	1.96166	1.92185	2.46061	1.94211	1.3398	1.46889	1.27884	1.27884	1.27884	1.0127	2.68488	2.03852	1.58553	1.78297	1.92344	2.20312	1.52162	-0.381123	2.02655	0.899671	1.6487	1.53433	0.627592	1.67683	1.99833	0.817993
HBB	2.40616e-06	-5.61868	0.000121334	5.66794	7.24529	1.43292	0.057311	-0.719728	1.02399	2.29858	2.2051	1.92279	3.35661	2.64557	0.481617	0.373642	1.87336	2.79632	1.5619	2.08897	1.88196	-0.0101368	0.876222	-0.981364	1.23292	0.936481	2.01249	-1.45203	2.78056	0.958613	0.958613	0.958613	2.8691	0.859641	1.7789	2.74672	2.96938	-0.596517	1.70053	9.19549	1.193	2.05092	0.436308	2.18458	3.54697	-0.516241	-0.192471	-0.064397	0.0948263
PPIL1	2.40633e-06	-5.61864	0.000121334	0.627755	2.53298	1.63591	2.29392	0.621302	1.31913	2.34394	0.88434	2.16652	2.04491	2.21185	2.3126	1.30648	1.89446	2.77003	2.3919	2.43807	1.77245	1.93593	2.62851	2.77099	2.90566	2.7478	2.15931	2.77872	2.43087	2.83694	2.83694	2.83694	2.13113	3.53204	2.92249	2.69432	2.64048	2.66595	3.36025	2.847	1.73344	2.00176	2.31825	2.83335	2.22384	1.21767	2.7777	2.59639	2.13882
AC116407.1	2.42367e-06	-5.61553	0.000121586	-1.05341	0.251554	0.347419	0.691362	2.23384	1.05637	1.16894	0.148674	0.917121	-1.39889	1.17223	0.676689	0.121387	0.482917	1.35444	1.00503	0.844493	1.59082	0.608083	-1.80165	-0.981364	-0.380995	0.900893	0.0801588	0.396464	-0.480901	-0.555967	-0.555967	-0.555967	-0.849646	-0.620094	-0.294407	-0.110323	-0.869024	0.387537	-0.999732	0.0969434	-0.539683	1.26812	0.707246	-1.34179	-1.56702	1.54165	0.15219	0.475596	0.891902
ETS1	2.42402e-06	-5.61546	0.000121586	0.628274	8.20878	7.70192	8.21865	7.03189	7.55119	7.06869	7.14027	7.71666	7.69061	7.73358	8.19663	7.63828	8.08146	7.35067	7.60191	8.04677	7.54032	8.31833	9.02501	8.47495	8.11612	8.24657	9.02471	8.04436	8.11279	8.20101	8.20101	8.20101	7.54299	9.43027	8.37639	7.44635	7.8611	8.01421	8.06719	8.43872	8.04928	7.14611	7.30712	8.68723	8.71432	6.95105	8.75793	8.66371	7.97391
ADCY4	2.42662e-06	-5.615	0.000121586	-0.556144	4.24689	4.42837	4.99998	5.06092	4.67411	5.12649	4.83438	5.21078	3.43955	4.72524	4.19988	3.92798	4.5156	4.32575	4.69936	5.03517	4.364	4.7996	3.8484	4.24494	3.81879	3.31245	4.10786	3.60223	4.46849	4.01556	4.01556	4.01556	3.76032	3.71953	4.05337	3.80464	3.60558	3.76166	3.27105	3.94696	4.60072	4.59296	4.3577	3.86049	3.4024	5.05157	3.8296	4.12222	4.60453
MSH2	2.43465e-06	-5.61356	0.000121733	0.578119	3.6405	3.02478	3.44036	2.60891	2.98954	2.76667	3.02034	2.97301	3.73055	2.74882	3.04784	3.51229	3.50158	3.43758	3.13095	3.27646	2.76215	2.9379	3.52171	4.0353	3.91136	4.2987	4.48728	3.77361	3.09442	3.86918	3.86918	3.86918	2.69203	4.61658	3.65403	3.60149	3.40274	3.76527	3.76053	4.06036	3.37267	3.09025	3.42196	4.3301	3.53674	2.63909	4.12799	3.75565	3.7029
SLC8A1	2.46258e-06	-5.60861	0.00012271	-0.900264	6.90181	7.03849	6.51101	7.32028	8.0974	8.29644	7.56189	7.08478	7.43578	7.00324	8.05065	8.84135	6.49184	6.41611	7.4176	7.09631	7.82506	7.72518	5.80379	5.87661	5.58903	6.46013	6.73957	6.19699	6.18601	6.49004	6.49004	6.49004	7.55685	6.25452	5.89154	6.86439	5.60274	6.05306	5.46243	5.69865	7.36561	6.62568	6.89816	6.36477	6.97372	7.55965	5.21886	5.61554	6.9258
PIGU	2.46448e-06	-5.60827	0.00012271	0.512985	3.48341	2.83165	3.48813	2.81382	2.7728	2.47204	2.27545	2.93761	3.12107	3.06115	3.14994	2.91281	3.3108	3.49488	3.24837	3.41418	3.02346	2.4998	4.02242	3.74136	3.59232	3.58892	3.52091	3.37137	3.04523	3.66459	3.66459	3.66459	3.18689	4.18827	3.80133	3.06827	3.57571	3.87311	3.81203	3.85416	3.31591	2.95475	3.15395	3.95512	3.4024	2.56171	3.8296	3.77242	3.01984
MTND5P14	2.50477e-06	-5.60123	0.000124456	-0.628144	5.15902	6.6966	4.89757	5.02836	5.64239	6.34913	4.878	5.7181	4.43632	5.17093	5.67412	5.71216	5.23902	5.83895	5.79068	5.6439	5.70732	6.05041	4.86083	4.89789	4.24267	4.05336	4.77735	4.37166	4.82482	5.13125	5.13125	5.13125	5.33582	5.34435	5.09761	4.84882	5.15876	5.20087	4.30385	5.18275	5.33368	4.98003	5.52609	4.11875	4.01677	6.0716	4.5133	4.40891	5.55271
LRRFIP2	2.5258e-06	-5.5976	0.000125198	-0.55941	6.27528	7.14973	6.02688	6.43845	6.19951	7.5478	6.52267	6.53405	6.16586	6.31791	7.45662	7.29623	6.09511	5.87639	6.87799	6.65621	6.55988	6.86646	5.80993	5.91325	5.75002	5.22319	5.96094	5.88256	6.50907	6.0828	6.0828	6.0828	6.43027	6.31541	5.60241	5.83051	5.80296	5.8829	5.33619	5.65117	6.95234	6.07117	6.4272	5.65985	5.85897	6.98775	5.47649	5.64429	6.61606
DNAJC10	2.53021e-06	-5.59684	0.000125198	0.527429	5.93423	5.56989	5.86702	4.92604	4.9249	5.25375	4.58852	5.28308	6.36611	5.42587	5.82408	5.76274	5.62233	5.27811	5.53947	5.42887	5.39037	5.66371	6.08269	6.53356	6.00478	5.80151	6.25388	5.8286	5.29874	6.12565	6.12565	6.12565	5.82677	6.17019	5.90354	5.77693	6.20245	6.06631	5.91518	6.09065	5.33081	5.45664	6.04691	6.27392	6.22173	5.03449	6.07868	5.92763	5.55414
LRIG1	2.56491e-06	-5.59093	0.000125986	0.557846	4.00457	3.67372	3.87447	3.81838	3.05511	2.49233	3.16078	3.55888	3.46137	3.4462	3.43701	3.41257	3.82089	3.71064	3.41291	3.76943	3.93905	3.54556	4.44561	4.15509	4.10472	4.33915	4.20121	3.76803	3.84416	3.85813	3.85813	3.85813	3.33097	5.01607	4.59041	3.93078	4.05426	4.17993	4.31281	4.0861	3.44855	3.6803	3.71597	4.51442	4.60396	3.03231	4.1377	4.50733	3.45116
CYYR1	2.56873e-06	-5.59028	0.000125986	-1.24791	0.00204468	-0.101032	-0.178042	0.934088	1.02399	0.0975504	0.5629	0.326472	-0.876886	-1.1368	2.64342	1.99911	0.53757	0.994642	-1.13997	0.992588	0.409608	-2.58525	-1.80165	-0.856496	0.386704	0.437518	-2.78952	-0.93245	-0.387901	-1.3847	-1.3847	-1.3847	0.00719594	-1.43568	-0.556212	-0.240281	-0.420644	-0.753255	-0.503639	-2.56755	-0.717846	0.943074	0.163731	-0.85152	-0.496185	0.286502	-2.02695	-2.58221	0.378077
SAMSN1	2.57356e-06	-5.58947	0.000125986	-1.09092	6.36844	6.67947	5.16442	7.1957	7.33022	8.13606	6.69428	6.91769	5.05649	6.89275	8.53059	8.10085	5.86604	7.66295	6.97101	6.41718	6.0144	7.53534	5.29436	6.04315	5.33124	5.44789	5.96094	5.25892	6.09529	5.90099	5.90099	5.90099	6.3289	5.46724	5.46626	6.26783	5.04345	5.63467	4.31876	5.38081	6.32851	6.35791	6.60552	5.0978	4.02044	8.37979	5.23403	4.8049	6.68785
AFF1	2.5746e-06	-5.58929	0.000125986	-0.719569	9.05593	10.6465	9.48312	8.68304	9.9144	9.92831	9.03316	10.0904	8.24014	9.10822	9.13939	8.9651	9.05698	9.4691	9.10847	10.2248	10.2145	10.5419	9.28127	8.50144	8.1286	8.42648	9.18388	8.5668	9.00679	8.5009	8.5009	8.5009	9.2376	8.80053	8.56002	8.56552	8.54439	8.36106	7.84749	8.76255	8.61781	8.75018	9.201	8.82329	8.6777	10.5826	8.30816	8.18275	9.16698
TRAJ27	2.57933e-06	-5.58849	0.000125986	1.12692	1.2606	-0.328437	0.824914	0.101297	-0.345257	-2.28127	-0.733103	0.326472	1.09939	0.527293	-0.113093	0.653279	1.17691	-0.211215	0.851513	0.557881	-0.767533	0.0731682	2.11681	1.13803	1.58391	0.788541	1.62023	0.883218	0.311906	1.64726	1.64726	1.64726	0.363227	2.28243	1.7789	0.406406	1.92243	1.04061	2.03991	2.16755	1.03317	-0.90389	0.0384335	1.40953	1.31255	-1.18788	2.43331	1.94017	0.325702
RIC3	2.58205e-06	-5.58804	0.000125986	0.888588	3.48368	2.91203	3.01588	2.63076	2.38369	1.63817	1.36921	2.78662	2.55824	1.84326	2.59597	3.56391	3.72407	2.20989	3.3945	2.81492	2.05562	2.9379	3.33846	3.96935	4.13752	3.72742	4.01234	3.38602	2.9235	3.30661	3.30661	3.30661	2.57431	4.3475	4.18442	3.13532	4.12197	4.19072	3.91376	4.48083	2.59512	2.76155	2.06874	3.62563	3.4845	1.47568	4.20698	4.31477	2.49954
MAD2L1	2.58311e-06	-5.58786	0.000125986	0.965874	1.14962	-0.931081	0.195272	0.786155	-0.185259	-0.740452	0.087415	1.14113	0.131732	0.341579	0.736261	0.210463	0.240899	0.900851	0.338159	0.0273895	0.480968	-0.2935	0.620805	1.76188	1.83725	1.82618	0.264492	1.27829	1.3114	1.50342	1.50342	1.50342	1.16525	2.92491	1.68082	1.67838	1.4022	1.4531	1.78887	0.933773	0.648019	1.34897	0.747839	1.19153	0.537969	0.852181	0.983413	0.434054	0.817993
SRFBP1	2.58893e-06	-5.58688	0.000126012	0.612608	2.17328	1.15319	2.09673	1.191	1.39706	0.891907	1.28985	1.05566	1.98592	1.79583	1.74438	1.22331	2.27827	1.9063	2.05935	1.74355	1.71441	2.02232	2.58621	2.54061	2.39608	2.68642	2.45301	1.96513	1.85873	2.71162	2.71162	2.71162	1.9114	2.96253	2.13057	1.56622	2.21375	1.94911	2.32631	2.73434	1.50878	1.60082	1.41017	2.63748	2.09039	1.04647	2.46451	2.0948	1.75901
WDR3	2.62381e-06	-5.58107	0.00012745	0.478595	3.49811	2.88573	3.44036	2.65228	3.20707	2.90929	2.70057	2.66201	3.51103	3.32613	3.00003	2.81677	3.43116	3.40379	3.42203	3.05847	2.6113	3.4318	3.79986	3.9481	3.66366	3.85378	3.70218	3.42201	3.34529	3.77051	3.77051	3.77051	2.98641	4.25348	3.85178	3.09546	3.56966	3.35915	3.60375	3.73559	3.33888	2.80518	2.99442	3.74211	3.51607	2.71253	3.67815	3.78899	3.05243
ZNF445	2.64092e-06	-5.57824	0.000127654	-0.771583	7.60631	8.57195	6.76688	7.94815	8.30094	9.17686	8.51394	7.81627	7.09907	8.14104	9.06964	8.49335	7.23918	7.71123	8.26769	7.5587	7.97162	8.28049	7.23031	6.99369	7.12959	5.85596	7.07941	7.3094	8.41922	6.97132	6.97132	6.97132	8.14427	6.76098	7.22781	7.01841	6.60572	7.22396	6.2296	6.75764	8.26027	7.73468	7.62675	6.45067	6.7313	7.86921	6.82678	6.83778	8.44897
AC016831.5	2.6516e-06	-5.57649	0.000127654	-2.09166	-0.705983	-0.755238	-4.36345	0.435151	-1.25886	-1.17978	-0.626615	-1.45094	-2.65476	-2.16708	2.44347	3.54691	-1.9191	-1.46542	-0.466151	-4.36345	-1.6529	-2.14778	-4.36345	-2.8348	-2.37747	-0.418777	-3.37172	-1.94417	-1.2167	-4.36345	-4.36345	-4.36345	-1.17657	-2.56498	-0.876299	-0.383114	-3.3441	-2.73016	-1.40754	-2.56755	-1.15788	1.60082	-1.24704	-2.6894	-3.47624	-3.13743	-2.27918	-2.58221	-0.725963
AC007336.1	2.65194e-06	-5.57644	0.000127654	-0.771509	4.89627	6.6328	4.22796	4.55527	4.6974	6.30394	4.90266	5.84453	4.39157	4.90083	5.95051	5.59711	4.60788	4.91705	5.59897	5.4332	6.08624	5.89022	3.88376	4.71126	3.87292	3.55498	4.23472	4.19154	4.73978	4.88503	4.88503	4.88503	4.68071	4.98898	4.23022	4.57706	4.54528	4.54013	3.48713	4.38871	5.81328	4.82263	5.35927	3.59419	4.06025	6.08963	3.53853	3.80537	5.43712
SLC31A2	2.65446e-06	-5.57602	0.000127654	-0.791627	6.43562	7.20462	6.29204	6.4103	7.16742	7.37489	8.07371	6.40391	6.91632	6.91858	6.22458	7.55569	6.74795	6.2525	6.91963	6.39738	7.74669	7.9213	5.76481	5.70992	6.0765	6.37758	6.3807	5.74013	5.85365	6.35708	6.35708	6.35708	6.80671	6.06514	5.20384	5.8476	5.67778	5.40475	5.62964	5.92656	6.28924	5.64652	6.53913	6.07871	6.64944	7.3234	5.21275	4.72103	5.87434
CAAP1	2.65477e-06	-5.57597	0.000127654	0.506457	3.22999	2.40144	2.9589	2.39574	2.05553	2.45147	2.24772	2.73256	3.49702	2.39807	3.10545	3.05187	3.01588	2.93291	3.07424	3.03589	2.8045	2.85793	3.26884	3.44035	3.42366	3.12468	3.52693	2.97564	2.66593	3.67722	3.67722	3.67722	2.92361	3.88152	3.48415	3.08193	3.31866	3.29555	3.37173	3.62757	2.96358	2.65429	3.24184	3.50907	3.3797	2.14002	3.56276	3.4202	2.89059
TPP2	2.66319e-06	-5.5746	0.000127756	0.519779	6.2378	5.74834	6.00006	5.1544	5.4773	5.4376	5.20622	5.46814	6.43848	5.92744	5.85632	5.91627	6.2453	5.94408	5.79946	6.10227	5.56062	5.89738	6.55982	6.59088	6.09408	5.99957	6.49956	6.00982	5.52785	6.53813	6.53813	6.53813	5.96831	7.02604	6.03341	5.70702	6.20147	6.00416	6.2616	6.51682	6.29806	5.24587	5.86972	6.45067	6.51331	5.09066	6.50726	6.45592	5.98824
ZNF200	2.6676e-06	-5.57388	0.000127756	-0.599371	5.86446	6.71352	6.25505	5.84768	6.20042	6.51323	5.80726	7.04513	5.75336	5.73966	5.7911	5.32026	6.01551	6.68412	5.75324	7.33124	6.62925	6.87664	5.9374	5.39368	5.35552	4.78701	6.01766	5.78366	5.59632	5.60865	5.60865	5.60865	5.54845	5.49704	5.18249	5.21396	5.74374	5.77492	4.87355	5.68524	5.8577	5.71675	6.02952	5.13542	5.44604	6.81094	5.56671	5.17954	6.20489
HSPA8P3	2.70004e-06	-5.56863	0.00012905	-0.831035	0.990102	1.19663	0.195272	1.06825	1.02399	2.74992	0.60722	0.917121	0.619611	2.05952	1.62338	2.27169	0.690108	1.58301	2.87616	1.16901	1.00135	1.08031	1.17154	0.255053	0.50111	-0.097601	0.905799	0.707703	0.859074	0.813664	0.813664	0.813664	0.541098	1.06732	0.487285	-0.541658	-0.157187	-0.389344	-0.590139	0.17576	0.5725	-0.0726393	0.485147	0.0471307	0.617747	1.60473	0.551373	0.434054	1.54662
IGHV3-49	2.72573e-06	-5.56452	0.000130017	2.08038	0.763287	-0.931081	0.380244	-0.029688	-2.10019	-1.46255	-0.848081	-3.15815	-2.22498	0.584241	-1.37515	-3.08484	-2.24838	-1.46542	-3.1064	-0.820548	-1.6529	-1.31209	1.09315	0.723601	1.09398	-0.957637	-1.79229	0.61123	0.655646	2.13606	2.13606	2.13606	0.231162	-2.25755	-0.0728928	1.62339	0.0655069	0.691125	-0.344798	-0.378507	-4.36345	0.12395	0.899671	0.254445	-0.992503	0.500661	0.471721	0.555255	0.378077
ZNF678	2.74611e-06	-5.56128	0.000130728	0.645023	3.2947	2.41989	3.18277	1.35751	2.30501	2.51233	2.26165	2.75984	3.63779	2.31639	2.68936	3.28507	3.29502	2.64544	2.44654	3.11344	2.29223	2.67002	2.97301	3.56838	3.77777	3.26425	3.49656	3.5249	2.83945	3.89823	3.89823	3.89823	2.65385	3.85775	3.5243	2.78897	3.86469	3.42921	3.44425	4.09626	3.20775	2.76155	2.65348	3.77614	3.36821	1.66517	3.70887	3.57155	3.12319
FOS	2.76538e-06	-5.55825	0.000131383	-0.732718	7.46718	7.02273	7.76932	7.76391	8.87047	9.16071	8.62049	7.75021	7.6176	8.1552	7.65969	6.98676	7.75773	7.56363	7.65217	7.75123	8.19695	8.9651	7.7579	7.10393	6.37606	5.46169	7.65546	7.36269	7.74424	6.98662	6.98662	6.98662	7.7973	5.62457	7.05702	7.7548	7.33186	7.39361	6.55591	6.32375	7.68199	7.70906	7.79599	6.75504	6.73186	8.26701	6.8117	6.55976	7.68394
LINC01215	2.80359e-06	-5.55228	0.000132703	0.749179	2.99373	3.50256	2.7283	1.72564	1.95606	1.11763	1.51592	2.47713	2.46052	1.41131	2.23212	2.99032	2.86377	1.72661	2.19319	2.33082	2.49545	1.89072	2.40338	3.65484	3.63471	2.78732	2.98639	3.2242	2.45617	3.059	3.059	3.059	2.95535	3.60523	3.54117	2.8778	3.62904	3.2601	3.32523	3.80541	1.76771	2.67011	2.13145	3.15546	2.99519	2.30105	3.10914	3.57155	2.28314
RPL3	2.80429e-06	-5.55218	0.000132703	0.62791	7.32136	6.81282	7.13964	6.349	5.90386	5.96782	6.44696	6.92449	7.64606	6.57044	7.01528	6.9223	6.60012	6.52425	7.06642	6.74331	7.15418	6.8061	7.40272	7.60281	7.83496	7.51925	7.14941	7.11035	7.03095	7.61552	7.61552	7.61552	7.43268	7.91737	7.29358	7.95991	7.31342	7.38424	7.72185	7.10405	6.67049	6.09773	6.88684	7.68721	8.10751	6.01322	7.27944	7.1362	6.99242
RAB5IF	2.83162e-06	-5.54797	0.000133731	-0.549385	3.40043	4.32939	3.11484	4.25815	3.48201	4.26446	3.18291	4.15476	3.44686	3.7056	4.01982	3.88127	3.14469	3.27886	3.84451	3.69209	4.24092	3.56007	2.87098	2.97801	3.20477	2.31949	2.95992	3.15744	3.64947	3.22298	3.22298	3.22298	3.71159	2.76373	2.93955	3.52854	3.26726	3.50903	2.70795	2.83491	3.52065	3.1703	3.62628	2.89141	3.08213	4.13874	2.63873	2.73113	3.92599
AC245884.11	2.84478e-06	-5.54595	0.000134087	-0.874632	3.63537	4.50811	2.99713	3.13758	3.73803	5.42973	2.93597	4.02022	2.19135	3.80478	5.3864	4.8618	3.78746	3.63255	5.34943	4.07656	4.08361	3.5309	3.19569	3.01934	2.6236	1.78773	3.56255	3.49141	3.31794	3.31202	3.31202	3.31202	4.42138	2.78068	3.4065	3.67093	2.91315	3.59283	2.47218	3.44073	4.2349	3.04244	3.8618	1.85381	2.36923	4.10095	3.27083	2.60577	4.31322
AC015871.3	2.85081e-06	-5.54503	0.000134106	-0.690978	6.56393	7.10198	6.29012	6.61464	7.35402	8.07726	7.62219	7.0008	6.92943	6.63419	7.6093	6.59845	6.49443	6.83121	7.25426	6.9148	6.72514	7.13535	6.21003	5.74607	5.84064	4.15504	6.53735	6.1081	7.12123	6.41099	6.41099	6.41099	6.9223	5.21314	5.90463	6.36181	5.95806	6.02995	5.4312	5.70697	6.73902	6.237	6.51214	5.12115	6.51787	7.19348	5.52539	5.95451	6.99661
MTCO3P11	2.86128e-06	-5.54344	0.000134154	-0.624363	3.92759	5.3851	4.0347	3.45179	4.32124	5.07025	3.85073	4.60562	3.31727	4.09664	4.36467	4.42331	3.84276	4.41751	4.5199	4.56869	4.55799	4.83583	3.27773	3.81831	3.09973	2.75778	3.69149	2.98529	3.70331	3.8765	3.8765	3.8765	4.3153	4.02714	3.64885	3.59674	3.89887	3.78322	2.72596	4.12137	3.85137	3.58339	4.04805	3.17685	3.10307	5.04306	3.33975	3.31543	4.26536
SUMF2	2.86308e-06	-5.54317	0.000134154	0.516406	4.71286	4.52099	4.59505	4.23694	4.32124	3.25629	3.92702	4.12884	4.94735	4.3058	3.87494	4.19134	4.69461	4.3614	3.86471	4.35268	4.23577	4.54256	5.29655	4.93291	4.84908	4.72731	5.03785	4.57397	4.18038	4.98151	4.98151	4.98151	4.55859	5.2379	4.33711	4.55519	4.5329	4.72605	5.06792	4.95031	4.53759	3.98225	4.2906	5.22745	5.1499	3.61824	5.10138	5.0394	4.35302
MAOA	2.87825e-06	-5.54087	0.000134492	-1.91975	2.5289	0.0953606	-0.566887	6.22699	2.51764	1.70922	5.52054	3.64187	3.97259	3.88062	3.31533	4.70968	0.366977	1.95378	0.851513	1.32619	-0.0122418	3.21049	-0.506746	0.0786146	0.768106	1.38589	-1.5703	-0.551248	4.00714	-0.814162	-0.814162	-0.814162	-0.466535	0.127144	2.06986	0.973633	1.4022	2.18339	-0.071566	-0.270055	0.0109122	1.78644	2.34495	-0.382527	0.316786	4.9306	-1.81233	1.2251	1.21348
SMIM25	2.88226e-06	-5.54027	0.000134492	-0.805812	8.3471	9.90225	7.39008	8.94393	9.26274	9.70479	9.1507	8.32639	8.30944	9.07414	8.81827	8.67084	9.12437	7.94433	8.61172	8.68116	9.27216	9.15766	8.12441	8.60975	6.75755	7.19449	8.17168	8.52665	8.80737	7.50331	7.50331	7.50331	9.25164	7.36007	7.68972	8.69533	7.6175	7.52074	7.05482	7.90452	8.77135	8.50433	8.58709	7.06764	7.95556	9.558	7.55477	7.35337	8.68132
IGLV3-1	2.8872e-06	-5.53952	0.000134492	2.11622	4.413	2.98817	2.9589	4.7674	-2.10019	0.829492	1.88336	1.77015	2.69957	3.54274	3.22464	0.940459	1.36998	0.156589	1.1872	0.0273895	2.38817	3.5309	4.65452	7.1724	5.1734	0.749058	-0.131226	4.94192	3.8053	3.98542	3.98542	3.98542	3.18689	1.45298	5.06688	5.33298	5.55913	5.58438	5.86526	2.39871	0.853411	3.50617	4.82423	2.66196	2.41461	3.94514	4.08848	3.7172	4.24435
GNS	2.89533e-06	-5.5383	0.000134608	-0.670617	8.47921	9.43983	8.59331	8.52575	9.19175	9.17254	8.52319	8.51308	8.48457	8.88294	10.3408	9.59097	8.25611	8.70912	8.535	8.27577	8.83196	9.40305	8.74398	8.30154	7.44666	8.1622	8.83808	8.32756	8.14403	8.29582	8.29582	8.29582	8.83922	8.08028	7.84609	7.92576	7.1897	7.88346	7.27152	7.39867	8.4588	8.37638	8.62963	8.34902	7.99133	9.44309	7.60493	7.69307	8.98846
AL021707.1	2.91329e-06	-5.53562	0.000135179	-0.800672	2.87865	3.8676	3.69419	2.99322	3.29112	3.81886	3.02034	4.38245	1.64826	3.26649	3.34434	3.6698	2.58114	3.16243	3.20677	3.77626	3.87427	3.97724	2.72265	2.26632	2.07747	0.666694	2.51493	2.71051	2.72958	2.41264	2.41264	2.41264	2.43116	2.40775	2.93955	2.30926	2.24445	2.92715	1.46344	2.50936	2.61408	3.04244	3.19857	1.62401	1.38274	3.75662	2.27807	2.0814	3.23391
PRPS1	2.92022e-06	-5.53459	0.000135237	0.475965	3.64792	3.0722	3.58546	2.85153	2.89423	3.03906	2.97877	3.22871	3.29314	3.31776	3.47248	3.38413	3.64538	2.97953	3.35696	3.36066	3.295	3.23783	3.86619	3.95238	3.73943	3.75259	4.02516	3.69929	3.38536	3.80543	3.80543	3.80543	3.13239	4.6213	3.85178	3.51853	3.65784	3.60499	3.76053	3.94134	3.56028	2.71656	3.24184	3.95016	3.86156	3.04374	4.00253	3.78073	3.31674
EXOSC8	2.93418e-06	-5.53251	0.000135403	0.601271	3.37571	2.8724	3.38376	2.36999	2.47036	2.10138	2.40663	2.47713	3.46857	2.9786	2.14688	2.65163	3.49469	3.22182	3.19618	3.06964	2.51258	2.81017	2.88268	3.61765	3.72773	3.78712	3.49041	3.35656	3.08633	3.80926	3.80926	3.80926	2.53284	4.16264	3.47833	2.92404	3.56358	3.49603	3.67038	3.95816	3.49019	3.1251	2.97745	3.69842	3.45765	2.0294	3.76006	3.50791	2.78786
CNKSR2	2.93733e-06	-5.53205	0.000135403	0.797851	3.08333	2.96323	2.60991	1.45871	1.71365	1.77693	2.08487	2.40983	2.25935	1.99798	2.1023	3.17871	2.83132	3.10049	2.53325	2.63125	1.26664	2.02232	2.54263	3.33954	3.78907	3.41061	3.75445	3.04191	2.43087	2.79893	2.79893	2.79893	2.51875	3.51694	3.73934	2.6854	3.71377	3.19724	3.60375	3.59926	1.83388	2.65429	2.6101	2.17611	3.08213	2.0294	3.34535	3.38793	2.61315
UBA5	2.94617e-06	-5.53074	0.000135403	0.57644	3.66893	2.83165	3.62262	2.92412	2.71312	2.22776	2.73093	3.07428	3.72455	3.35096	3.01213	3.23287	3.57527	3.47874	3.31841	3.34236	3.08201	3.26466	3.65047	4.32951	4.00482	3.62208	3.75958	3.84958	3.43075	4.1148	4.1148	4.1148	2.8691	4.36165	3.58521	3.26073	3.75701	3.76527	3.63745	3.8955	3.46952	3.18138	3.46521	3.99419	3.65017	2.28187	4.08514	3.98152	3.3301
EXOSC2	2.9465e-06	-5.53069	0.000135403	0.554665	3.55808	2.55953	3.46103	2.88828	2.78251	2.81579	2.78015	2.9613	3.66312	3.09094	2.87309	3.38413	3.35712	3.1825	3.36644	3.30507	2.46057	3.08565	3.29534	3.75611	3.96551	3.7121	3.76469	3.56408	3.02846	3.69802	3.69802	3.69802	2.89115	4.07946	3.55784	3.45696	3.82968	3.53044	3.87392	4.00747	3.16982	2.99298	2.81502	3.92763	3.95283	2.30105	4.05129	3.8135	3.26205
ITK	2.99216e-06	-5.52402	0.000136442	0.813848	6.98143	6.2541	6.91279	5.60435	5.85292	5.22373	5.70901	6.7569	6.24451	6.56956	6.12641	5.02725	7.03113	6.22857	6.39446	7.02284	6.06608	6.36646	7.61399	7.00454	7.24525	7.11324	7.62735	6.82463	6.63214	7.09997	7.09997	7.09997	5.85929	8.06566	7.40989	6.22537	6.8722	7.19476	7.1017	7.61077	6.76998	5.64852	5.96427	7.68442	7.0717	5.11253	7.7182	7.63209	6.49974
PABPC4	2.9934e-06	-5.52384	0.000136442	0.58027	5.38698	5.23693	5.06892	4.75253	4.53166	3.97117	4.40612	4.68959	6.11286	4.83196	4.64279	4.60268	5.03808	4.77888	4.79019	4.77711	5.06712	5.14107	5.85071	6.16324	5.40412	5.61369	5.47486	5.38463	5.24892	5.42497	5.42497	5.42497	5.45348	5.92921	5.19853	5.53768	4.97414	5.3624	5.80934	5.05044	4.86486	4.38344	5.20928	5.69658	6.11151	4.40997	5.43378	5.30726	4.95635
AC022400.7	2.99966e-06	-5.52293	0.000136442	-0.739724	0.422465	1.84146	0.491573	1.91563	0.025704	0.951733	0.691974	1.01094	0.270016	1.01542	1.88262	1.2655	-0.904505	-0.319947	0.796482	0.116194	0.735609	0.662897	-1.10301	-0.273964	0.218518	-0.418777	-0.571485	0.50784	0.366316	-0.147001	-0.147001	-0.147001	0.0857785	0.127144	-0.376507	-0.049486	-0.327376	-0.0473203	-0.344798	-0.16919	0.0109122	-0.90389	0.436308	0.435678	-0.00302801	0.500661	0.100166	0.15603	0.740093
GPRIN3	3.0012e-06	-5.5227	0.000136442	0.606478	6.76071	6.27831	6.20997	5.52489	5.4547	6.10588	5.48238	6.73386	6.36804	6.21573	6.68954	6.05352	6.58073	6.25368	6.52925	6.47184	6.39647	6.05169	7.5141	6.98538	6.70927	6.4609	6.783	6.82059	6.58129	6.96961	6.96961	6.96961	6.27017	8.08263	7.27437	6.40048	7.0849	6.65897	6.81872	7.04295	6.792	5.35265	6.19003	7.31312	6.83769	5.40832	6.89469	6.73943	6.41767
AL078600.1	3.00264e-06	-5.5225	0.000136442	-0.847006	1.37664	3.06049	1.35307	0.435151	1.67246	2.49233	0.370603	2.69065	0.334486	1.01542	2.33204	2.61946	0.99358	2.4104	1.9118	2.11075	2.07881	1.79581	1.73323	1.10769	0.386704	0.623679	0.749729	0.0733741	0.698691	0.509223	0.509223	0.509223	1.67768	1.12156	0.889768	0.608696	1.16601	1.66925	0.103993	0.840086	1.73344	1.42552	1.48412	0.830524	0.930511	2.39327	0.100166	0.434054	2.22713
FCER1G	3.00514e-06	-5.52214	0.000136442	-0.806111	9.10281	10.4765	8.80294	9.44585	9.42131	10.7886	7.78809	9.14222	8.08043	9.6402	10.6204	10.3206	9.16982	9.03529	9.72096	9.43398	9.91586	9.9491	9.39094	8.44909	8.26388	8.25827	9.09545	9.20031	8.77662	8.86476	8.86476	8.86476	9.61249	8.25326	9.07279	9.40622	8.38558	9.23881	8.50081	8.24443	9.25583	9.44599	9.265	7.90227	7.46554	10.1316	8.15523	7.54878	9.72051
CEBPB	3.00916e-06	-5.52155	0.000136442	-0.858418	8.36711	9.55514	7.88567	9.69808	9.47545	10.0456	8.30257	8.72949	8.01001	9.15493	9.19618	8.77719	8.27608	8.36425	9.14765	8.23762	9.01646	9.82136	8.47845	7.86923	7.40472	7.13063	8.18317	8.55347	9.40335	7.65409	7.65409	7.65409	8.85683	7.21601	8.15409	8.74608	7.9113	7.96965	7.29585	7.30699	8.57431	8.49603	8.42092	7.0685	7.38232	9.43348	7.20172	7.38709	9.31674
CD5	3.03791e-06	-5.51743	0.000137484	0.910557	5.26736	4.60399	5.49851	3.22637	4.01014	2.40941	3.77504	5.03769	4.60915	4.88392	4.15693	3.60556	5.29165	4.43852	4.40503	4.96816	4.17789	4.28304	6.15682	5.30956	5.25855	5.7599	5.8464	5.22876	4.64393	5.34547	5.34547	5.34547	4.56203	6.5198	5.35459	4.6245	5.4365	5.07539	5.96248	5.49471	4.76238	4.09202	3.87561	6.18437	5.92318	3.23532	6.06602	5.93509	4.45102
FAM160A1	3.07598e-06	-5.51202	0.000138944	-0.931085	2.65087	2.77546	1.23003	1.68444	2.10281	3.7447	2.52687	5.20583	3.1119	3.21332	4.2721	3.89477	2.83132	3.3604	2.33511	2.69029	2.67354	2.39036	1.41656	2.32023	2.14941	3.16273	2.72861	1.30937	2.48104	2.31906	2.31906	2.31906	1.26993	2.87052	2.13057	3.34811	2.16643	2.35641	2.05423	0.515845	3.0635	3.48844	3.50719	2.21797	1.21332	2.56171	0.863704	1.87956	2.51131
MTR	3.09048e-06	-5.50997	0.000139334	0.531886	5.62963	5.1092	5.78879	4.71211	5.16285	4.23467	4.7078	4.95749	5.63356	5.43751	5.05323	5.05758	5.68571	5.33749	4.91815	5.51509	4.85854	5.34549	6.01254	5.7137	5.70796	5.99535	6.15039	5.46964	5.0781	5.77353	5.77353	5.77353	5.08872	6.33203	5.66788	5.19365	5.72617	5.52375	5.66858	6.06111	5.43842	4.97686	5.09592	6.14151	5.86409	4.40111	6.14758	6.15079	5.1867
IGHV1-18	3.12619e-06	-5.50499	0.000140678	1.95463	3.41536	2.67153	3.0617	2.26211	-1.83965	0.548724	1.17676	-0.421936	2.27586	2.71096	3.04784	0.991621	0.913187	-2.0788	-0.110158	0.679439	0.676037	2.54427	3.41296	4.69094	3.63053	0.666694	0.0801588	3.58329	3.14975	2.07377	2.07377	2.07377	3.12311	0.578692	3.83364	4.34467	2.33283	3.71005	2.94171	2.36547	-1.15788	0.777699	4.33123	3.93768	2.92636	4.29034	2.39063	2.19768	2.81661
SMC2	3.14219e-06	-5.50277	0.000141132	0.774792	3.42603	2.6086	3.0617	2.58672	2.44612	1.35768	1.97077	2.91351	3.18366	2.41387	3.49852	2.72905	2.92655	3.01354	2.95366	2.85418	2.73322	2.68334	3.74323	4.28953	3.73554	3.77242	3.34115	3.26441	3.27592	3.89463	3.89463	3.89463	2.82397	5.2486	3.2374	3.43584	2.99669	3.38759	3.08119	3.09022	2.79108	2.79078	3.41568	3.85254	3.32133	2.56171	3.57233	3.48775	3.40773
RADX	3.19294e-06	-5.49581	0.000143142	0.884072	1.59098	1.06218	1.19755	-0.95986	0.266184	-0.0124783	-0.0435068	1.01094	0.983542	1.20891	0.549614	-0.90633	1.69251	1.24418	0.851513	1.43377	1.00135	0.226603	1.78402	2.13711	1.83725	1.60075	1.79013	1.94548	0.78111	1.73038	1.73038	1.73038	0.886667	2.38576	2.05428	1.4656	2.52016	2.02347	1.4418	2.2966	1.14167	0.890028	0.969987	2.21797	1.44967	-0.387879	2.34666	2.55823	1.52355
HBA2	3.23829e-06	-5.48968	0.000144903	5.38123	6.70879	1.94697	-1.27218	0.934088	0.922234	2.12756	1.79032	1.43992	2.80571	2.90227	0.0832152	0.448795	1.66822	1.9063	-0.764075	2.50538	1.09531	1.26881	1.88053	-0.196218	-0.0237012	0.708464	1.97772	-1.45203	2.46866	0.471062	0.471062	0.471062	2.69203	0.859641	1.14648	2.72946	1.71882	-0.152569	1.93541	8.29881	1.29049	2.16696	-0.0987905	1.97595	3.2973	-0.270011	0.0461955	-0.474859	0.817993
ST20	3.2529e-06	-5.48773	0.000145055	-0.730412	5.60652	6.2821	5.12179	5.44698	6.3186	7.27524	6.56612	6.0967	5.96033	5.7965	6.61513	5.63783	5.59037	6.10125	6.30118	6.04968	5.81308	6.06575	5.38558	5.09245	4.56111	2.89072	5.3832	5.11462	6.15737	5.47283	5.47283	5.47283	6.07931	4.00206	5.07462	5.17306	5.10957	5.31754	4.22687	4.65943	6.31843	5.53648	5.836	4.11654	5.35441	6.26097	4.63026	4.77194	6.16632
UROS	3.25384e-06	-5.4876	0.000145055	0.51956	4.24236	3.71912	4.02548	3.66799	3.4458	3.41348	3.69002	3.64187	4.44365	3.86921	2.79119	3.59733	4.36884	4.1381	3.79623	3.99109	3.59754	3.89376	4.49979	4.10606	4.57206	4.3655	4.44337	4.11445	3.90975	4.20185	4.20185	4.20185	4.07159	4.90062	4.46047	4.21739	4.61743	4.23051	5.17342	4.64911	4.05931	3.57501	3.67446	4.77076	4.68722	3.03231	4.48061	4.22931	3.89037
FKBP5	3.27641e-06	-5.4846	0.000145788	-1.16801	9.15547	9.51347	8.65552	10.7708	10.6237	10.1893	10.8139	9.86495	8.34043	10.1858	10.9257	10.8561	8.57896	9.15946	9.48507	8.66354	9.23168	10.7368	8.25954	8.09959	8.28067	8.5209	9.09672	8.09261	9.50072	8.65245	8.65245	8.65245	8.66221	7.9559	7.5936	8.2881	7.05436	8.4546	6.42144	6.88698	9.06774	8.69881	9.42737	7.30683	7.16386	11.3749	7.46763	7.71897	9.60646
CEBPD	3.30692e-06	-5.48058	0.000146769	-0.839142	8.14292	8.3745	7.96227	9.28506	9.31648	9.7576	9.10446	8.83947	7.92391	8.77891	8.80377	8.53759	7.8245	8.32557	8.54443	8.70036	8.67296	9.88245	8.17077	7.53104	7.43562	6.4586	8.25092	7.92056	8.64766	7.86191	7.86191	7.86191	8.34482	6.5906	7.67642	8.28368	7.4588	7.8845	6.8354	6.85366	7.99653	8.1191	8.25591	7.21213	7.00651	9.30982	7.40368	7.06399	8.75821
LINC00482	3.31284e-06	-5.4798	0.000146769	-0.873905	1.97125	1.84146	2.26287	2.8328	3.27744	2.69846	4.10756	1.29825	3.02667	1.66994	1.55885	1.69397	2.43044	3.19243	2.49919	1.97487	1.82824	3.28227	1.4484	1.10769	2.04011	2.78732	1.42762	1.36959	0.740489	2.83694	2.83694	2.83694	1.3032	0.95233	1.41403	2.8778	1.25917	0.270266	1.41984	0.933773	1.69835	1.78644	1.78649	1.93637	1.74441	0.852181	1.77964	0.301729	2.22713
RPS5	3.31693e-06	-5.47926	0.000146769	0.62324	6.44805	6.14052	6.09678	5.74122	4.96383	5.34023	5.51909	6.06425	6.46572	5.8884	5.90419	5.949	5.87535	6.10125	6.2925	5.7167	6.17633	6.09095	6.10907	6.63209	6.91719	6.40325	6.21244	6.50621	6.32214	6.57233	6.57233	6.57233	6.51347	6.81803	6.56367	7.15069	6.75513	6.64431	6.96382	6.1565	5.61583	5.10749	6.24069	6.76743	7.17997	5.22973	6.12579	6.13872	6.00811
GCFC2	3.32347e-06	-5.47841	0.000146787	0.597584	3.42654	2.36383	3.36925	2.58672	2.84873	2.49233	2.16118	2.66201	3.35661	2.84516	2.74842	3.05187	3.40199	3.16243	3.15302	3.13485	2.8045	3.04495	3.44488	3.57394	3.84791	3.71722	4.03365	3.4291	2.67674	3.83578	3.83578	3.83578	3.10435	4.1594	3.64885	2.81375	3.44961	3.36869	3.50289	3.90709	3.28075	2.96761	2.80543	3.65641	3.64542	2.16115	3.85337	3.69099	3.0764
IGHV7-4-1	3.34119e-06	-5.4761	0.000147148	4.96264	1.36558	-2.43793	-4.36345	-2.09055	-4.36345	-2.97541	-3.40099	-0.55008	-4.36345	-3.22961	-2.4473	-4.36345	-2.24838	-3.16759	-4.36345	-4.36345	-4.36345	1.23303	-4.36345	-0.122448	-4.36345	2.41088	-4.36345	2.5764	-4.36345	1.63004	1.63004	1.63004	1.0127	-4.36345	0.487285	-2.26409	-4.36345	-1.80148	-2.93595	1.1444	-2.26246	-4.36345	3.24184	1.53407	2.01872	1.9096	-4.36345	-2.58221	1.83592
RBPJ	3.34812e-06	-5.4752	0.000147148	-0.72509	7.97811	8.41644	7.55054	8.17609	8.52593	9.79954	8.45718	8.29672	7.84243	8.32301	9.24986	8.9649	7.92177	7.47436	8.79419	8.11772	8.39007	8.55657	7.57621	7.55934	6.87758	6.45937	7.44175	7.74803	8.08619	7.28044	7.28044	7.28044	8.26712	7.39902	7.81955	7.7548	7.56221	7.65009	6.78904	6.87965	9.03207	7.74311	8.60273	7.02051	7.67962	8.80272	7.2688	6.89584	8.54641
IGLV3-10	3.35016e-06	-5.47493	0.000147148	2.53204	3.89408	3.31819	2.21501	3.04296	-1.83965	0.695928	1.46865	0.172568	-0.0212265	3.17676	2.00876	1.13505	-0.414934	-0.861814	-0.219345	-1.4262	1.30647	2.27193	2.60045	2.82793	2.97989	-0.610885	-0.20918	5.40636	3.61056	3.19398	3.19398	3.19398	3.96648	0.457421	1.08646	6.63053	4.33311	3.20258	2.11017	0.933773	-0.381123	2.44955	5.77715	6.4858	2.62229	1.17674	2.35778	2.06789	0.699506
MCM5	3.36176e-06	-5.47343	0.000147291	0.585428	5.4413	4.96906	5.30442	4.75751	4.78455	3.76151	5.08804	4.42568	5.44933	5.07981	4.74784	5.55096	5.13653	4.91705	4.89541	4.93802	4.6576	5.37246	5.76639	6.10204	5.58795	5.35067	5.67662	5.58367	5.46535	5.27938	5.27938	5.27938	4.89227	6.60792	5.09761	5.62658	5.20047	5.30765	5.64747	5.49471	4.8609	4.50309	5.38202	5.93111	5.70995	4.35139	5.68511	5.58146	5.11714
MS4A4A	3.37185e-06	-5.47213	0.000147291	-1.07804	3.81985	2.4914	3.89487	3.84667	4.53166	4.48296	3.16078	3.79478	3.43221	4.51798	4.4737	6.56506	4.60148	5.68743	4.35353	4.19342	4.22022	4.26986	3.95752	2.64991	3.71987	4.56342	4.08354	1.94548	3.18045	4.20766	4.20766	4.20766	3.39409	3.52199	3.71971	3.04753	3.41629	1.71485	2.03991	3.72252	2.87206	3.13654	3.87561	3.57176	1.63363	1.63527	2.91201	2.39461	2.82607
AL353660.1	3.37193e-06	-5.47212	0.000147291	1.1769	1.24347	1.19663	0.691362	0.221373	0.5652	-2.28127	0.087415	0.465529	-0.0212265	-1.83296	-0.113093	-2.4178	0.953944	-0.110107	0.796482	1.03876	-0.943233	-0.518974	0.00236146	1.85613	1.18808	2.02109	2.11201	0.798128	1.03733	1.09032	1.09032	1.09032	0.48421	2.25842	1.87073	0.531149	1.6744	1.91044	1.78887	2.26089	-0.108309	0.890028	0.436308	1.36551	0.866632	-0.813324	2.3013	1.7331	0.214878
JPT2	3.37813e-06	-5.47132	0.000147291	0.457499	3.85456	3.41332	3.64687	3.38906	3.20707	2.89412	3.16819	3.57433	3.76019	3.46906	3.07116	3.24346	3.40934	3.89221	3.59325	3.92502	3.54023	3.43967	4.01712	4.26912	3.97873	3.86305	3.94195	4.17476	3.55308	3.95117	3.95117	3.95117	3.52677	4.74522	4.06897	3.95325	3.93226	3.94183	4.0487	3.51082	3.37267	3.10196	3.74132	4.15152	4.00939	2.92517	4.05812	3.70852	3.677
RIPK3	3.39252e-06	-5.46948	0.000147649	-0.469046	4.92497	5.25245	5.47669	5.83126	5.09237	5.52142	5.26273	5.4968	4.31375	5.24785	5.37707	5.26934	5.47609	4.31215	5.09389	5.37591	5.36937	5.41499	4.88138	4.62554	4.57859	3.77242	4.83432	4.53506	5.2252	4.78359	4.78359	4.78359	4.57911	4.59278	4.585	4.62916	4.97414	4.44638	4.21735	5.00529	5.29602	4.67757	5.00883	4.83539	4.22534	5.70314	4.82313	4.66377	5.10748
IGHJ3P	3.471e-06	-5.45955	0.000150789	1.47944	0.534641	0.000503456	0.544174	-0.51392	-1.61904	-2.97541	-1.26096	-2.51077	0.270016	-0.669215	-0.222267	-0.573251	-1.23007	-2.0788	-0.219345	-2.49011	-1.6529	0.429915	0.442582	2.21032	0.673677	-0.331535	-1.05644	0.923952	-0.218159	-0.147001	-0.147001	-0.147001	0.842085	-2.00425	-0.0060182	0.882901	1.42918	1.17719	1.37488	0.515845	-1.15788	-1.10459	1.06943	0.435678	0.765175	0.0349145	2.23047	0.104	0.0308339
NIPAL3	3.48074e-06	-5.45833	0.000150938	0.504397	5.48741	5.23693	5.46309	4.60579	4.82975	3.98555	4.90266	5.58333	5.18662	4.99572	4.88904	5.09899	5.51747	4.78217	4.77959	5.57311	4.86188	5.20711	5.6238	5.89115	5.51607	5.3993	5.9123	5.12776	5.02834	5.65726	5.65726	5.65726	4.68071	6.16536	5.76442	5.29243	5.36495	5.52908	5.49036	5.75107	5.26037	4.77222	5.26453	5.92733	5.55011	5.05157	5.99391	5.82691	5.21217
CNIH4	3.4931e-06	-5.45679	0.000151121	-0.654003	6.20136	6.77122	6.04296	6.47666	6.32443	7.56825	5.70773	7.23328	5.26107	6.46066	7.41621	6.91817	5.84181	6.67529	6.93404	6.70086	6.85337	6.77845	5.89037	5.69597	6.07727	5.55909	5.9077	6.13437	6.28113	5.85265	5.85265	5.85265	6.33495	5.70225	5.99515	6.07808	5.97074	6.15169	4.56629	5.73326	6.53781	5.78007	6.64635	5.57863	4.97728	6.60651	5.63343	5.63515	6.8467
CARNMT1	3.49764e-06	-5.45622	0.000151121	0.513942	3.69998	3.08381	3.69419	2.42104	2.947	2.84764	2.79938	3.60474	3.9367	3.39937	3.49852	2.71389	3.50158	3.43758	3.08576	3.26679	3.28506	3.40793	3.83642	3.8553	3.73164	4.06144	4.23104	3.76242	3.16518	3.9684	3.9684	3.9684	3.42465	4.529	3.7635	3.4144	3.91328	3.73609	3.38313	4.11138	3.13086	2.88868	3.06036	4.35658	3.80304	3.21525	4.13447	4.0346	3.46334
BMS1	3.54656e-06	-5.45019	0.000152758	0.548792	4.04219	3.57842	3.86933	3.15276	3.31808	2.76667	3.00385	3.63452	4.02236	3.82264	3.59821	3.5297	3.91679	3.92831	3.67942	3.74875	3.14927	3.73014	4.7661	4.5172	4.00805	4.2606	4.49959	3.84958	3.23994	4.25615	4.25615	4.25615	3.52677	4.97983	3.89179	3.64355	3.67485	3.67971	3.74294	4.25896	3.73497	3.62456	3.67446	4.39176	4.17018	2.6836	4.40222	4.44334	3.677
UAP1	3.54834e-06	-5.44998	0.000152758	0.863853	3.75502	2.62459	3.72869	3.65738	2.38369	2.49233	2.67996	2.71873	3.07464	3.55704	2.98783	2.75889	3.20503	2.74326	3.14203	3.01294	2.8045	2.68334	4.01712	4.97553	4.06806	3.34592	2.68618	3.91671	3.46232	3.95809	3.95809	3.95809	3.31474	3.41748	3.29157	3.63431	3.51404	4.713	4.42458	2.9515	2.5167	3.1703	4.42809	3.85254	3.00264	3.36852	4.25535	3.9189	3.86766
C16orf58	3.57421e-06	-5.44682	0.000153594	0.540973	4.44269	3.8473	4.63197	3.87441	3.70266	3.38121	3.55512	3.67808	4.70979	4.24087	3.47248	4.1968	4.23055	4.18859	3.57701	4.08209	3.67567	4.50179	4.75977	4.81347	4.81262	4.79673	4.63959	4.43996	4.29351	4.51013	4.51013	4.51013	4.02748	4.59518	4.61452	4.32757	4.66361	4.57558	5.06968	4.81527	3.89077	3.93065	3.99001	5.09892	4.59906	2.66891	4.85487	4.61349	4.18311
RNF135	3.60563e-06	-5.44302	0.000154321	-0.53044	5.49929	5.73735	5.68867	6.60363	6.05474	6.19212	5.80726	6.35219	5.21258	5.93293	5.72647	5.97941	5.41901	4.97285	5.52685	6.3615	5.92447	6.24709	5.57776	5.23784	4.99615	4.69131	5.38817	5.74582	5.48085	5.28489	5.28489	5.28489	5.47918	4.78146	5.5506	5.04988	5.21411	5.51733	4.23633	5.42181	5.30771	5.83724	5.82774	5.06032	5.01276	6.22001	5.11127	4.73178	5.93022
TTC39C	3.60609e-06	-5.44296	0.000154321	0.678391	5.66097	4.8786	5.4699	4.44242	4.5658	4.55223	4.13809	5.04603	5.18225	5.42782	4.7765	3.91479	5.8019	4.92898	5.80991	5.67711	5.28465	4.6884	5.77269	5.5723	5.61043	5.61094	5.90075	5.47821	5.01563	5.72672	5.72672	5.72672	5.16987	6.8744	6.0134	5.074	5.81579	5.31137	5.74123	6.19722	5.42507	5.0207	4.94698	6.39154	6.05351	3.61058	6.0265	6.04955	5.28598
IGKV3-7	3.61054e-06	-5.44243	0.000154321	2.44956	-1.20654	-3.1008	-2.70843	-4.36345	-2.41838	-2.97541	-4.36345	-3.15815	-4.36345	-2.16708	-4.36345	-4.36345	-4.36345	-1.73975	-1.99324	-4.36345	-4.36345	-2.58525	-4.36345	-1.26911	-0.133253	-0.957637	-3.37172	-1.94417	-1.57843	-0.637004	-0.637004	-0.637004	-1.59998	-2.25755	-2.44298	-0.541658	-1.00687	-1.98372	-1.97816	-2.56755	-4.36345	-1.96124	-2.0896	-1.79543	-2.53612	-1.41933	-2.97372	-2.58221	-0.725963
C15orf41	3.62112e-06	-5.44116	0.000154392	0.54043	2.52478	1.94697	2.26287	1.72564	1.92131	1.80964	1.91896	2.0608	2.00585	2.41387	1.80128	2.4831	2.29423	2.20989	2.17173	2.17417	1.59082	1.86757	3.03723	2.67081	2.60666	3.1851	2.70755	2.45657	2.16532	2.54711	2.54711	2.54711	1.9114	3.20159	2.81562	2.30926	3.06709	2.93359	3.10203	3.14021	2.63279	2.21088	1.91681	3.02004	2.45861	1.29622	3.04179	3.08657	2.21278
ARHGAP44	3.62891e-06	-5.44022	0.000154392	-1.62909	1.35801	-2.43793	-0.0952508	1.72564	1.65141	0.829492	1.51592	0.86782	1.54306	0.406177	-0.0116025	5.83456	0.305315	2.70215	0.413241	-0.995618	0.17154	-1.54073	-1.30053	0.55398	2.06513	3.27124	-2.78952	1.1468	0.611276	0.263465	0.263465	0.263465	0.541098	-2.56498	1.33885	1.4656	1.69678	1.39825	1.82274	0.17576	-0.717846	2.98035	0.863185	-0.719225	0.217855	0.207416	2.99981	1.04366	-1.2541
AC107027.3	3.63161e-06	-5.4399	0.000154392	0.687347	1.79686	1.06218	1.35307	1.00273	1.14938	0.384776	1.08572	1.33499	1.72241	1.09595	0.676689	1.34634	2.08998	1.64218	0.904521	0.895566	0.548964	1.46664	1.92647	2.18148	2.27265	2.35937	2.4403	1.88487	0.655646	2.04807	2.04807	2.04807	0.842085	2.4613	2.10053	1.54665	2.18237	1.96177	2.29044	2.38218	1.89716	1.26812	1.27783	2.06121	1.8138	-0.0597428	2.14318	2.0814	0.996116
MAP9	3.64012e-06	-5.43888	0.000154478	0.729062	1.57784	0.748618	1.6695	-0.719728	0.0896852	0.695928	0.772023	1.50586	1.30642	1.27958	1.00201	1.04103	0.871246	1.1248	1.05278	0.679439	0.676037	0.608083	1.38401	1.80032	1.98874	2.29228	1.64259	1.48298	1.03733	1.92643	1.92643	1.92643	1.05237	2.13202	1.68082	1.4233	2.1175	1.98677	1.95081	2.18671	1.66237	1.34897	0.935258	2.13299	1.4277	-0.516241	2.18124	2.28205	1.29747
CHPF	3.65395e-06	-5.43724	0.00015478	1.09281	3.28222	2.5428	2.93939	3.66799	1.6932	1.74347	1.58403	1.47327	2.29218	2.79779	2.40728	1.56479	2.35636	2.71598	2.17173	1.92657	1.68449	2.5296	3.72385	4.82517	3.38444	3.19982	1.66462	3.82828	3.30407	3.30119	3.30119	3.30119	2.95535	2.52305	2.78762	3.9156	3.25976	4.23574	3.86176	2.2966	1.69835	2.76155	3.97299	3.41142	2.29837	3.04374	3.55311	2.90843	3.1685
TIMM9	3.6602e-06	-5.43649	0.00015478	0.571907	2.05344	0.913901	2.06108	0.934088	1.29219	1.16894	1.23442	1.71547	1.83811	1.64339	1.09596	2.0239	1.64352	2.02219	2.08254	1.20994	1.30647	1.66765	1.68059	2.33339	2.19545	2.55522	2.6201	1.5881	1.19596	2.17219	2.17219	2.17219	1.5449	2.55296	2.32492	1.62339	2.06686	2.04743	2.45068	2.26089	2.25209	0.994239	1.70637	2.29039	2.346	1.04647	1.90622	1.864	2.02845
ASPRV1	3.70888e-06	-5.43076	0.000156401	-1.05543	4.73375	5.80382	6.04524	5.53652	5.98706	5.11346	5.96991	5.946	3.29314	5.46431	2.67421	2.25084	5.08471	6.1441	4.24468	6.43994	5.82513	5.51894	4.14406	5.18797	3.52179	4.70169	5.40299	4.77661	4.43069	4.05156	4.05156	4.05156	4.73048	3.69739	3.38797	4.13132	3.68608	4.79843	2.9184	4.7873	3.52065	4.62172	4.6558	3.89445	2.72493	6.75816	4.3079	4.13847	5.48119
MYBBP1A	3.71165e-06	-5.43043	0.000156401	0.545657	4.07985	3.37602	4.09765	3.63593	3.24269	2.84764	3.46768	3.67091	4.01254	3.68622	3.30553	3.40315	4.11849	3.91638	3.67942	3.76257	3.16018	3.73014	4.67821	4.846	4.45155	4.70427	4.32045	4.11004	3.99855	3.9684	3.9684	3.9684	3.54079	4.70138	4.13342	3.927	3.71377	3.61304	4.24573	4.34248	3.60834	3.81447	3.59881	4.70605	4.55414	3.04374	4.41558	4.35983	3.54578
LRRC20	3.73239e-06	-5.42801	0.000156997	0.776117	1.19857	0.0953606	0.737267	-0.719728	0.519473	0.624202	0.469953	0.0889865	0.455377	0.691805	0.335181	-0.302831	0.590229	1.58301	0.904521	0.895566	-0.0122418	1.03947	1.4484	1.70222	1.51296	2.44834	1.11219	1.50999	1.44381	1.03907	1.03907	1.03907	0.929912	2.11875	1.31289	1.66028	0.718241	1.74447	1.17957	1.36225	1.03317	2.31516	0.747839	1.83241	0.496362	-0.0597428	1.44623	1.40788	0.699506
AC104162.2	3.75011e-06	-5.42596	0.000157465	-0.50663	4.92883	5.83508	5.2281	5.07693	5.341	5.40587	5.0464	5.51693	4.48329	5.10435	5.15496	5.18393	5.08929	5.43899	5.31068	5.67894	5.61319	5.66035	4.65793	4.74614	4.30175	3.5319	4.9885	4.45045	4.97682	4.65546	4.65546	4.65546	5.02034	4.72127	4.35312	4.1509	4.57276	4.68654	3.99771	4.93055	5.26337	4.6539	5.10181	4.25166	4.38491	5.88249	4.50582	4.51731	5.37405
TRUB1	3.77389e-06	-5.42321	0.000158185	0.575371	3.07126	1.99697	2.96855	1.87958	2.43385	2.76667	2.13114	2.35721	2.88318	2.31639	2.56345	2.3522	3.05387	2.86001	3.02721	3.00133	2.0081	2.65657	3.01614	2.96114	3.71593	3.08558	3.59158	3.27231	2.56486	3.6347	3.6347	3.6347	2.78916	3.45493	3.23048	2.78062	3.42971	3.15926	3.34284	3.48009	2.63279	2.53842	2.62106	3.5158	3.01005	1.75133	3.42681	3.29817	2.90851
LSR	3.78756e-06	-5.42164	0.000158479	0.756818	2.74645	2.5428	2.24709	2.205	2.03942	0.384776	1.86523	2.01625	1.86017	1.58878	1.68515	2.85872	2.34108	2.50905	2.27599	2.23493	1.74372	2.60152	3.38855	3.64959	3.06915	3.23597	2.75964	2.5764	2.90524	2.84442	2.84442	2.84442	1.95392	3.46545	3.74905	2.5738	2.7408	2.83379	3.20194	3.14021	2.01595	2.57249	2.42223	3.03884	2.66046	1.44153	2.86602	2.73113	2.56877
TET2	3.80427e-06	-5.41973	0.000158689	-0.628512	9.47572	10.3849	9.09354	9.33229	10.1725	10.8105	10.0796	9.74773	9.39956	9.69617	10.3953	9.88167	9.72234	9.22639	9.98627	10.0406	10.1169	10.304	9.34358	9.22742	8.22453	7.68109	9.43965	9.06401	9.67461	9.05625	9.05625	9.05625	9.91164	8.58795	9.21152	9.23796	9.02924	8.76852	8.45345	8.91948	10.1516	9.58611	9.81648	8.51794	9.27246	10.2526	8.68392	8.482	9.69211
IGLV1-47	3.80587e-06	-5.41955	0.000158689	2.09324	4.253	3.02478	3.48813	3.36319	-1.25886	1.8729	2.39404	-0.304251	2.64976	3.78061	3.13895	1.38512	2.44481	0.900851	1.88568	-0.16852	0.951975	3.26466	4.35613	7.48015	3.33902	1.84503	0.574703	4.52517	2.77051	2.83694	2.83694	2.83694	2.64089	1.36579	2.71018	5.10109	4.4231	4.90391	4.15224	2.4312	0.5725	2.57249	4.68745	3.64724	3.07508	4.79179	5.10634	4.18617	3.72834
TRAPPC6A	3.8308e-06	-5.41671	0.000158993	0.751419	0.932783	0.268194	0.98569	0.221373	-0.185259	-0.943459	0.0234387	-0.195447	1.09939	-0.0335562	0.549614	0.121387	0.173472	1.03935	-0.466151	0.199848	0.0825738	1.23303	-0.0860906	0.763063	1.65154	1.90014	1.14389	0.50784	0.896531	1.01275	1.01275	1.01275	0.424986	1.29676	1.05548	1.11322	0.959426	0.564009	1.95081	1.66512	0.788143	1.04365	0.102442	1.08697	1.28837	-0.270011	0.471721	0.803809	0.0948263
IGFBP2	3.83098e-06	-5.41669	0.000158993	-1.31587	1.04503	1.81383	2.45369	2.23384	1.08804	0.469077	1.97077	1.29825	1.36932	1.97687	-0.942624	0.210463	-0.0500672	4.15344	0.484607	2.94183	0.613899	-0.786333	-1.10301	0.0786146	0.912929	1.74822	0.264492	-0.551248	2.00308	0.782841	0.782841	0.782841	-0.849646	0.578692	2.56378	1.58553	0.580623	1.06429	0.68558	-1.79186	0.648019	1.34897	0.665478	0.463788	-0.337286	0.627592	-1.05432	-0.188679	0.428617
IL7R	3.83317e-06	-5.41644	0.000158993	0.929332	8.22566	7.06216	8.48753	7.22113	7.44321	5.13297	6.73417	7.9876	7.07804	7.44257	7.51253	5.57002	8.24537	7.45438	7.30813	7.75858	7.50652	7.95807	8.91235	8.34566	8.68173	8.87538	9.14659	8.16263	7.60092	8.42339	8.42339	8.42339	7.48798	9.37047	9.15625	7.35613	8.63825	8.47186	8.42789	8.56075	7.78699	6.53248	6.8436	8.99497	8.64981	6.32325	9.14952	8.29976	8.13358
GNPNAT1	3.85776e-06	-5.41367	0.000159536	0.555755	2.63731	1.94697	2.32432	2.31706	1.65141	2.07473	1.39472	2.28393	2.29218	2.17525	2.38883	1.78379	2.21261	2.63091	2.10536	2.47211	2.252	2.08387	2.62851	3.12155	2.85636	2.71744	2.70755	2.73361	2.22543	2.81425	2.81425	2.81425	2.18567	3.64743	2.72009	2.50449	2.97854	2.74866	2.99468	2.94026	2.47584	2.6383	2.30471	3.03884	2.61259	2.0294	2.75264	2.64271	2.01197
NOP56	3.85963e-06	-5.41345	0.000159536	0.518661	4.50761	4.18588	4.77913	3.93714	3.81575	3.27982	3.68486	4.00889	4.30975	4.1209	3.77905	3.83299	4.20122	4.42174	4.20825	4.20865	3.86762	4.62424	5.12494	4.7584	5.02512	4.79188	4.66166	4.56434	4.33503	4.61884	4.61884	4.61884	4.03245	5.31119	4.53254	4.10145	3.94166	4.30446	4.53342	4.88437	3.98844	3.88394	4.20207	5.21406	4.89362	3.39553	4.89931	4.87061	4.08805
FAM177A1	3.93823e-06	-5.4047	0.000162503	-0.501773	4.31273	4.73866	4.19544	4.25815	4.32788	5.25968	4.5002	4.90652	4.24414	4.37602	5.59989	4.46011	4.20545	4.3789	5.18776	4.62652	4.80393	4.75614	3.65047	4.31631	3.67994	3.47253	3.99071	3.92677	4.68999	3.80159	3.80159	3.80159	4.44766	4.03776	3.56336	4.24194	3.81441	3.93864	3.58413	3.59926	4.68829	4.17197	4.52761	3.56853	4.43807	4.71881	3.88446	4.07232	4.66639
PRDX4	3.97584e-06	-5.40057	0.000163772	0.779269	2.53242	1.1084	2.73962	2.49439	1.11904	1.48462	1.08572	1.71547	1.86017	1.66994	1.80128	1.34634	1.76301	2.47691	2.27599	1.77116	1.95896	1.23303	2.21262	3.19553	3.18208	2.13269	2.58589	2.62662	1.95063	3.05255	3.05255	3.05255	2.01544	2.77223	2.33786	2.86995	3.19835	3.00874	2.70795	2.70807	2.01595	1.22594	2.95161	2.99617	1.8961	2.09678	2.69242	1.75013	2.41432
CGAS	3.99016e-06	-5.39901	0.000164078	-0.618037	5.4165	6.55566	5.13472	5.47744	5.35409	6.6254	4.79899	6.42003	4.75171	5.58257	6.31283	6.08478	4.9899	6.17448	6.28752	5.86822	5.76743	6.25826	5.18523	4.71126	4.86163	4.74749	5.40299	4.7343	5.55739	5.52731	5.52731	5.52731	5.34583	5.55484	5.32242	4.81854	4.88925	4.48417	3.95635	5.19935	5.62987	4.90849	5.07214	5.30233	4.62584	5.69953	4.82913	4.41693	5.33979
LYRM1	4.06087e-06	-5.39138	0.000166698	-0.616522	5.07257	6.06782	5.22408	5.35807	5.14037	6.06583	4.83438	6.16462	4.13976	5.20991	5.96615	5.27193	4.94258	5.51218	5.53947	5.769	5.94827	5.79528	4.65793	4.83678	4.4774	4.21785	4.97535	4.91692	5.04928	4.86678	4.86678	4.86678	4.77563	4.77935	4.65383	4.82058	4.85235	5.00219	4.04511	5.02937	5.14454	5.45664	5.32111	4.40269	3.5672	6.34536	4.51081	4.52227	5.61132
CUTA	4.1114e-06	-5.38601	0.000168482	0.505323	4.17168	3.97753	4.20364	4.04686	3.63993	2.95386	3.21906	3.56662	4.07048	3.97414	3.22464	3.70854	3.75323	3.92236	3.55231	3.90023	3.75698	3.9987	5.06459	4.19891	4.61716	4.16633	4.23104	4.49507	4.20671	4.44272	4.44272	4.44272	3.93499	4.54397	4.46047	4.27204	4.19059	4.30942	4.78611	4.24988	3.95908	3.58339	3.59325	4.34529	3.90196	3.25512	4.47552	4.23537	3.75829
MTA3	4.1245e-06	-5.38463	0.00016873	0.571717	3.25623	2.70199	3.17445	2.65228	2.65086	1.99166	2.54976	2.42695	3.04605	2.94638	2.14688	3.45875	3.05387	3.01354	2.69244	2.50538	2.71853	2.48466	3.60882	3.48823	3.70403	3.80648	3.49041	3.59595	2.84903	3.0845	3.0845	3.0845	2.53284	3.58607	3.4065	2.91643	3.25223	3.2754	3.61346	3.6622	2.75738	3.31818	2.88037	3.51916	3.37397	1.66517	3.89213	3.48775	3.01157
ARHGAP26	4.14843e-06	-5.38212	0.000169418	-0.645563	9.2394	9.97909	9.20953	9.44412	9.9721	10.2357	10.1408	9.65961	9.24147	9.79418	9.98144	9.63563	9.183	8.83709	9.49388	10.0241	9.98192	10.19	9.22738	8.88691	8.02443	7.05524	9.10366	8.97807	9.45859	8.78279	8.78279	8.78279	9.44954	8.44407	8.49097	9.05559	8.36564	8.84495	7.97276	8.5979	9.69055	9.41287	9.56587	8.18629	9.04978	10.1206	8.56931	8.38943	9.69235
H2BC9	4.17463e-06	-5.37938	0.000170197	0.805107	4.38985	3.22686	4.485	4.09481	3.52314	3.38121	2.97877	3.43741	3.26033	4.1257	3.97724	3.57234	2.68163	3.92831	3.89777	3.75567	4.00105	3.59573	4.82186	5.11741	4.9021	3.4906	3.45293	4.76265	4.59919	4.31927	4.31927	4.31927	4.0225	5.42474	4.18799	5.07912	4.51412	4.62219	5.11139	3.48783	3.56028	3.76376	4.76366	4.1687	3.57222	4.04518	4.16328	4.06553	4.37895
NOL11	4.18364e-06	-5.37845	0.000170273	0.524181	4.49685	4.05038	4.27929	3.22637	3.72801	3.63949	3.19748	4.0971	4.48329	3.97414	4.24159	4.0952	4.47767	4.3614	4.42331	4.21871	3.71319	4.34302	4.57743	4.96076	4.65678	4.61649	4.89612	4.40081	3.71907	4.75012	4.75012	4.75012	3.7663	5.30973	4.71952	4.02219	4.61156	4.58379	4.45999	5.07635	4.12686	3.63266	4.2166	4.88301	4.513	3.20511	4.8955	4.75727	4.32327
POLR3E	4.23661e-06	-5.37298	0.000172135	0.484978	4.54698	4.34395	4.56036	4.05496	3.68723	3.19572	3.83218	4.03704	4.40664	4.39206	3.76482	4.2503	4.4279	4.3789	4.23437	4.28246	3.88088	4.23863	4.66472	4.65992	4.89165	4.87447	4.72591	4.47122	4.29351	4.59907	4.59907	4.59907	4.3791	5.02321	4.73671	4.30736	4.77559	4.50162	4.95217	4.72315	4.44534	4.25298	3.92512	4.94165	5.09346	3.35023	4.96805	4.84904	3.79728
HBA1	4.3153e-06	-5.36499	0.000174885	4.9694	5.07593	0.184364	-0.359403	-2.09055	0.025704	1.06442	0.60722	0.763856	1.54306	1.61634	-1.65233	-0.431714	0.482917	0.851565	-0.764075	0.736581	0.17154	-0.401837	0.442582	-1.62891	-1.05836	-0.097601	1.07978	-2.69691	1.33887	-0.406389	-0.406389	-0.406389	1.33572	-0.533733	0.340826	1.28841	1.10038	-1.12944	1.20548	6.99145	-0.108309	1.84335	-0.612047	0.518415	2.17193	-1.69514	-1.31184	-0.397819	-0.965996
COX11	4.31897e-06	-5.36462	0.000174885	0.554969	4.15464	3.65048	4.03929	3.28266	3.18527	2.90929	3.10777	3.65646	4.22301	3.60599	3.5241	4.0952	3.82089	3.87997	3.77504	4.05426	3.5814	3.70424	4.1294	4.44624	4.50051	4.09726	4.67257	4.02366	3.60491	4.48402	4.48402	4.48402	3.67393	4.62599	4.4486	3.7586	4.52666	4.26923	4.52573	4.71986	4.08671	2.95475	3.62628	4.34718	4.45174	2.94968	4.68427	4.68385	3.59086
NOLC1	4.33349e-06	-5.36316	0.000175176	0.549065	4.70808	4.51671	4.76535	4.01398	4.3179	3.32576	3.65878	4.03146	4.60589	4.4621	4.32642	3.88127	4.3575	4.54312	4.27015	4.41964	3.83395	4.95867	5.41206	5.32283	4.69535	4.99117	5.30999	4.67289	4.6549	4.81821	4.81821	4.81821	4.17856	5.6978	4.71705	4.22357	3.951	4.51886	4.33938	4.74593	4.15302	3.89744	4.38691	5.16247	4.86325	3.57164	5.15177	5.00612	4.39493
SDR42E1	4.40131e-06	-5.35642	0.000177616	0.641176	3.10821	2.38276	2.80574	2.26211	2.00665	2.01988	2.59448	2.55706	2.67488	2.50517	2.92521	2.84487	2.84222	2.61622	2.58287	2.66107	2.49545	2.45391	3.50667	3.70129	3.24363	3.41061	3.31354	3.2078	2.84903	3.07181	3.07181	3.07181	2.60131	3.79656	2.98957	2.5641	3.61736	3.7544	3.76924	2.859	3.2325	2.74671	2.47154	3.05741	3.52127	1.66517	3.4633	3.54253	2.73864
SYNJ1	4.4228e-06	-5.3543	0.000178182	-0.438545	6.47811	6.99147	6.79156	6.59671	7.1059	6.97358	6.59461	6.71656	6.45307	6.63419	7.36582	6.62604	6.82687	6.25605	6.89692	6.73807	7.06483	7.18827	6.66773	6.25606	5.60191	5.69645	6.68472	6.13111	6.28378	6.33468	6.33468	6.33468	6.50723	6.37383	5.89044	6.06525	6.06191	6.08597	5.67323	6.19248	6.85511	6.05319	6.80144	6.13114	6.30693	7.19605	6.09373	6.16832	6.5049
APEX1	4.43721e-06	-5.35289	0.000178392	0.556428	3.71793	3.18434	3.55374	3.25479	2.72324	2.15327	2.88288	3.14841	4.13072	3.39937	3.14994	2.74404	3.58827	3.33373	3.53561	3.16639	3.1272	3.16374	3.79368	4.08675	4.13456	3.80166	4.07534	3.75679	3.55308	4.01224	4.01224	4.01224	3.4693	4.71246	3.77305	3.84526	3.38906	3.35436	4.08753	3.76775	3.38376	2.44955	3.29759	4.067	4.17018	2.41102	3.70452	3.84554	3.35644
NEDD4	4.44298e-06	-5.35233	0.000178392	-0.881564	4.0484	4.44647	3.25555	4.16388	4.0549	6.04366	2.70057	4.20028	2.95671	4.32681	6.44814	5.59298	3.52205	3.82995	5.20371	4.00859	3.99497	4.07647	4.16337	2.99469	3.2271	3.4846	3.20502	3.65158	4.3853	3.34405	3.34405	3.34405	3.97167	3.47068	3.43084	3.0123	3.16664	3.22901	3.07417	2.76015	4.61019	4.32469	4.09601	3.45758	4.01309	3.77044	3.27083	3.23304	4.40443
RPS28	4.48418e-06	-5.34832	0.000179744	0.496853	6.34857	6.06489	6.34025	5.4984	5.6662	5.22373	5.84477	5.80251	6.55636	5.75525	5.84622	5.70451	6.04411	6.12996	5.79946	6.03552	6.17767	6.35194	6.69535	6.34163	6.76329	6.32485	6.59583	6.26595	6.12222	6.39133	6.39133	6.39133	6.20235	6.56331	6.68121	6.51695	6.40799	6.40102	7.069	6.36322	5.93512	5.22192	6.03977	6.50029	6.95752	5.06566	6.37258	6.12736	6.02873
MRPS9	4.5033e-06	-5.34647	0.000179912	0.565369	2.37774	2.02134	2.13153	1.191	1.39706	0.891907	1.23442	1.79674	2.41652	1.97687	1.4913	2.25084	1.89446	2.06607	2.21434	2.34926	2.07881	2.0012	2.92855	2.51772	2.4059	2.38535	2.70755	2.51106	2.00308	2.73596	2.73596	2.73596	1.95392	3.22035	2.42526	2.2976	2.31847	1.89731	2.66191	2.92893	2.15187	1.95087	2.08468	2.58086	2.55295	0.565522	2.95658	2.30527	2.18365
SMPD4	4.50345e-06	-5.34645	0.000179912	0.467661	4.95606	4.75692	5.10876	4.50291	4.25302	4.03479	3.96157	4.20525	4.73688	4.66711	4.23128	4.7211	4.85921	4.78217	4.59034	4.824	4.35453	4.87698	5.50582	5.15498	5.16475	5.05125	5.0937	4.9665	4.71903	5.12204	5.12204	5.12204	5.0103	5.70225	4.70213	4.87456	4.82468	4.82813	5.1767	5.11936	4.55731	4.41664	4.57914	5.4128	5.3946	3.83105	5.27273	5.077	4.47826
EBP	4.51463e-06	-5.34538	0.000180057	0.692981	1.29709	0.184364	0.737267	1.06825	-0.730916	-0.404141	0.919916	0.651815	0.767046	1.05625	0.0832152	0.448795	1.33954	1.31861	1.05278	1.03876	-0.0122418	1.30372	1.3166	1.36016	1.58391	1.10233	0.790357	1.45546	1.2834	1.79359	1.79359	1.79359	0.929912	2.42941	1.28645	1.4656	1.6744	1.21998	1.82274	1.29323	1.29049	0.12395	0.787321	1.94637	1.23877	0.903261	1.54683	1.60793	0.657745
DDX54	4.5315e-06	-5.34376	0.000180428	0.50811	4.47975	3.93968	4.52808	4.01398	3.885	3.5358	3.80864	3.78153	4.70371	4.3434	3.37277	3.82596	4.31511	4.27057	3.85127	4.16768	3.95793	4.38845	5.08499	4.89789	4.77141	4.98906	4.81967	4.48149	4.41787	4.62971	4.62971	4.62971	3.98198	5.16875	4.585	4.43526	4.0629	4.22264	4.8053	4.58918	4.08671	4.11532	3.90731	5.02184	4.78117	3.24526	4.77417	4.61349	3.87223
MAL	4.55201e-06	-5.3418	0.000180484	0.971337	3.69474	3.52829	2.77306	2.60891	2.51764	1.77693	3.34217	3.38581	2.27586	1.1346	3.04784	0.448795	3.93726	2.79632	3.06263	3.22746	2.65823	3.291	3.76236	3.98612	4.0209	4.17007	4.02516	2.41431	4.08626	3.6347	3.6347	3.6347	3.36288	4.59038	4.83118	3.64815	3.38906	3.7138	4.47071	4.13623	3.09083	2.52108	2.72638	3.80114	3.79877	1.09121	3.89976	4.24741	3.02805
MARS2	4.55531e-06	-5.34148	0.000180484	0.602271	3.33172	2.40144	3.33234	2.05144	2.42147	2.20335	2.45593	3.0189	3.34883	3.08108	2.37015	2.65163	2.9965	3.29738	3.05092	3.05847	2.57914	2.98168	3.61584	3.61226	3.6009	3.17023	3.62566	3.03262	2.8298	3.53186	3.53186	3.53186	2.61463	4.47535	3.71971	2.9316	4.01027	3.67587	3.84124	3.76775	2.84021	2.35486	2.99442	3.43291	3.38541	2.07467	3.52872	3.57155	2.64556
SLC11A1	4.5556e-06	-5.34145	0.000180484	-0.878512	9.42404	9.75735	9.19623	11.2415	10.3077	10.4065	10.2642	9.53166	9.35375	10.3827	10.6279	10.4574	9.53473	8.10838	10.1596	8.72108	10.242	10.0518	9.07908	9.14965	8.99256	7.59949	8.37005	8.913	9.86415	8.63057	8.63057	8.63057	9.96783	7.80664	8.71378	9.58998	8.27235	8.9467	8.12476	7.80884	10.2928	9.7112	9.46143	7.75525	9.15746	9.9122	8.42346	8.51304	9.83684
TECR	4.59877e-06	-5.33736	0.000181891	0.507726	5.33372	5.06007	5.25202	5.15063	4.30448	3.99269	4.72801	4.86315	5.44751	4.87539	4.9086	4.80215	5.10747	4.74891	4.69936	5.30211	4.74716	5.03857	6.13253	5.67155	5.42238	5.29349	5.58433	5.42776	5.28997	5.30265	5.30265	5.30265	4.86189	5.86509	5.44251	5.34294	4.89894	5.34075	5.98416	5.23889	5.08464	4.58464	5.0821	5.58584	5.48246	4.14405	5.70157	5.68249	5.0216
SMAP2	4.60882e-06	-5.33641	0.000181987	-0.878271	9.9345	10.719	10.1423	11.1727	11.4518	10.5578	11.4638	10.2285	10.213	10.4944	10.4706	10.776	9.78722	9.6217	9.71738	10.1085	10.7143	11.4185	9.5829	9.36191	8.97142	8.76837	10.0048	9.21782	9.85259	9.41389	9.41389	9.41389	9.81817	8.68442	8.61566	9.59847	8.30594	9.27968	8.4099	8.43046	9.6284	9.79464	10.3043	8.68835	9.59772	12.0731	8.64473	8.88832	9.82893
ZDHHC20	4.63065e-06	-5.33436	0.000182547	-0.787128	7.48303	7.01365	7.00128	7.6218	7.73372	9.36016	7.43623	7.27525	7.0075	7.99839	9.51131	9.09635	6.85606	6.84386	8.55379	7.56413	7.56003	7.71062	6.61083	6.93929	7.10341	6.90616	6.82332	6.96116	7.45045	7.34879	7.34879	7.34879	7.27654	7.14578	7.61434	6.83646	6.99522	6.99209	6.52345	6.55695	8.34746	7.5207	7.56597	7.18045	6.95128	7.80854	6.80562	6.28317	7.85306
EPAS1	4.70535e-06	-5.32741	0.000185024	-1.06431	4.23234	3.92038	4.89504	6.47061	4.81799	5.44802	5.19355	5.36531	3.25201	5.31248	5.51102	4.44642	3.31862	3.75152	3.33781	4.30152	5.89374	4.5571	3.76236	3.23115	3.35432	3.28511	4.01234	3.12287	4.71903	3.33876	3.33876	3.33876	3.49832	2.89408	3.5243	3.61094	3.21395	3.50471	2.08247	3.93568	3.41652	4.44451	4.98992	2.85473	3.12372	6.41301	3.33413	2.59639	4.23728
LINC01259	4.709e-06	-5.32707	0.000185024	1.3371	0.565429	-1.13137	-0.265875	-2.09055	-0.185259	-2.97541	-0.848081	-1.2202	0.813022	-0.424877	-1.37515	-1.96341	0.366977	-2.0788	-0.337477	-0.277448	-0.469668	-1.81256	-0.929309	0.198604	0.940227	0.826972	1.07978	0.753624	0.196513	0.813664	0.813664	0.813664	-0.0759148	1.70465	0.817757	-1.03658	0.580623	0.424601	0.825814	1.71875	0.719782	0.890028	-1.41611	0.873068	1.79676	-3.13743	1.22117	0.301729	-0.180169
AC078816.1	4.79157e-06	-5.31952	0.000187959	-1.694	-0.122616	3.5619	-2.28487	1.35751	-0.0412469	-2.28127	-1.62107	2.0387	-1.62542	-0.316656	-3.1082	0.448795	-1.42532	0.449417	-1.37244	1.59696	1.52481	-0.0985484	-2.13746	-0.196218	-1.7353	-0.957637	-1.79229	-1.67722	-3.37644	-4.36345	-4.36345	-4.36345	1.26993	-0.375126	-0.876299	-1.15978	-2.33452	-0.596517	-0.201723	-0.763488	-1.79419	0.0290014	0.279011	-2.46085	-1.25135	1.13461	-2.27918	-1.62212	-0.257968
AC090948.2	4.83355e-06	-5.31573	0.000189294	0.959385	3.16945	2.74652	2.57241	1.68444	1.88571	0.548724	2.2051	2.32104	2.25935	2.05952	1.80128	2.39083	3.62659	1.42352	3.10853	2.74701	1.68449	2.73541	3.42101	3.90906	3.61367	3.35909	3.80985	2.56357	2.08648	3.37538	3.37538	3.37538	2.2034	4.18191	3.24428	2.5445	3.10941	3.17566	4.0051	3.10035	2.68751	2.16696	2.44709	3.15976	2.68845	1.77895	3.78499	3.83759	2.96952
LILRB3	4.88888e-06	-5.31079	0.000190814	-0.787023	8.56524	9.8126	8.44926	8.91889	9.0997	9.15416	8.55288	9.99808	8.0713	8.69049	9.94186	9.2699	8.48974	8.4619	8.36369	9.75801	9.37042	9.01895	8.63882	8.89817	8.26338	6.89941	8.10202	7.75016	9.17615	8.32503	8.32503	8.32503	8.27317	7.27477	8.70507	8.10245	7.63499	7.52608	6.31389	7.75371	8.68938	8.99041	9.55795	7.66657	8.06678	9.08165	8.37502	7.94606	8.31538
TLE5	4.89199e-06	-5.31051	0.000190814	0.508764	7.54094	7.33911	7.6982	7.10201	6.43786	6.8135	6.50081	7.16222	7.36954	7.24867	6.60117	7.11919	7.11439	7.12168	6.9903	7.46934	7.26825	7.47535	8.21077	7.42085	7.88345	7.77499	7.73956	7.39881	7.28686	7.67312	7.67312	7.67312	7.48345	8.24164	7.97997	7.35014	7.68237	7.56291	7.97841	7.80459	7.11255	6.52489	6.82653	8.15565	7.7675	6.5881	8.04151	7.82221	7.3156
ADAMTSL4-AS1	4.8999e-06	-5.30981	0.000190814	-0.687903	7.4523	8.01528	8.54533	7.56902	8.06693	7.82723	8.62807	8.43669	7.10601	8.41098	6.69048	6.85999	7.68847	7.1846	7.25554	8.82251	8.2062	8.09579	7.52534	7.41312	6.64176	5.28316	7.11233	7.12079	7.60375	6.87962	6.87962	6.87962	7.63651	6.33634	6.49101	7.03211	6.80555	7.42167	6.23511	6.81494	6.90021	7.59146	7.82829	6.66522	7.01297	8.48649	7.00313	6.75691	7.57352
CCR6	4.90435e-06	-5.30942	0.000190814	1.08033	0.545978	-0.931081	0.643948	-0.719728	-1.25886	0.384776	-1.42981	-0.846578	-0.737812	-1.56186	-0.942624	0.294359	0.240899	-0.110107	-0.337477	-0.664443	-0.469668	0.151924	1.4484	1.07671	1.11809	0.280216	-0.131226	0.61123	-0.580312	-0.555967	-0.555967	-0.555967	0.160301	0.891204	1.46207	-0.173839	1.90331	0.941801	1.09893	1.10466	-2.26246	-0.181987	0.0384335	1.36551	1.40539	-2.03644	1.09395	0.958319	-0.257968
IGHV3-30	4.91316e-06	-5.30864	0.000190845	1.90498	3.09051	2.83165	0.98569	1.191	-0.970871	1.21849	1.60604	-1.2202	1.86017	3.35914	1.9844	0.832346	0.690108	-0.211215	-2.44502	-0.523591	1.22568	3.79906	-0.0860906	5.66115	3.85868	1.78773	-1.37795	4.3972	2.45617	2.27544	2.27544	2.27544	1.97472	1.47397	3.4065	3.13532	3.23704	3.91929	2.25367	0.0969434	-0.108309	4.12682	2.71619	1.54727	2.98017	1.80604	1.89099	2.70517	3.6453
TFB1M	4.9382e-06	-5.30643	0.000191506	0.48551	3.47061	2.91203	3.0707	2.97625	2.83945	2.34394	2.62713	3.19912	3.49702	3.12011	3.20369	3.03977	3.79869	3.01354	2.90246	3.16639	2.76215	3.08565	3.30407	3.85985	3.49442	3.1552	3.69685	3.25645	3.30407	3.4943	3.4943	3.4943	3.40945	4.09309	3.38174	2.89338	3.94634	3.80447	3.61829	3.8116	3.33888	3.04244	3.02777	3.7102	3.08213	2.87488	3.76424	3.71287	2.93497
TRAP1	4.95434e-06	-5.30501	0.00019182	0.592669	3.7746	3.11811	3.75682	3.45179	2.74327	2.07473	2.84636	3.12761	3.74841	3.17676	2.95058	2.84487	3.79308	3.71753	3.43109	3.7136	2.85909	3.43967	4.29615	4.38432	4.26713	4.37201	4.00372	3.91166	3.84895	3.57748	3.57748	3.57748	3.28174	4.71467	3.67965	3.78807	3.56966	3.69875	4.09448	3.87202	3.37267	3.15913	3.42822	4.14286	4.07446	2.6836	3.96302	3.70416	3.23391
Z98884.2	4.96605e-06	-5.30399	0.000191962	-0.628373	1.8384	3.25795	1.78328	0.706082	1.86758	2.71582	1.88336	2.98462	1.79294	2.07947	2.19013	2.0239	2.08998	1.58301	2.01182	2.15334	3.295	2.54427	-0.180322	1.50685	1.01915	0.788541	1.07978	1.11197	1.61087	1.82418	1.82418	1.82418	1.88966	1.45298	0.991463	1.86377	2.06686	1.34124	1.64481	1.39557	2.09903	1.13767	2.43472	1.62401	1.95871	2.4459	0.954404	1.47086	1.9953
FARS2	4.98061e-06	-5.30272	0.000192213	0.503609	3.24665	3.1516	3.24765	2.75535	2.62949	2.15327	2.41911	2.47713	3.23522	2.96794	2.12476	2.85872	3.20503	2.99096	3.02721	2.60079	2.71853	2.92674	3.55865	3.27275	3.39927	3.4906	3.42094	3.34161	2.78056	3.32278	3.32278	3.32278	2.78916	3.74998	3.64885	3.03354	3.61736	3.28551	3.56924	3.59209	3.29256	3.04244	2.72638	3.78173	3.83677	2.20253	3.78086	3.47244	2.61315
YAE1	5.00516e-06	-5.30058	0.000192848	0.695348	1.6071	0.347419	1.09551	0.435151	1.26473	1.06442	0.847864	1.14113	1.30642	0.691805	1.18417	0.832346	1.10635	1.64218	1.1872	1.16901	0.0825738	0.491782	1.78402	1.70222	2.41566	1.84503	2.26399	1.45546	1.13459	2.21899	2.21899	2.21899	1.26993	2.0505	1.59726	1.24048	2.21375	1.57349	1.4418	2.4312	1.03317	1.60082	1.41017	1.54727	1.44967	-0.988481	2.14318	1.98401	1.02925
IL18R1	5.01833e-06	-5.29944	0.000193044	-1.3651	7.34901	7.38736	6.68506	9.3277	9.02125	8.90244	8.72789	8.48373	5.72057	8.50454	9.30347	9.09525	6.57093	8.00052	7.56996	7.24525	6.58338	8.92221	7.41385	6.34	7.06905	5.42927	6.36313	6.80636	7.04405	6.50547	6.50547	6.50547	6.27122	5.53125	6.23952	5.55615	5.89534	6.67348	4.20777	5.3891	7.35508	7.1319	7.88199	4.57688	3.89797	9.6236	5.83985	5.60037	7.86458
SCFD2	5.05032e-06	-5.29668	0.000193962	0.515155	3.75205	3.20576	3.81685	2.97625	2.90316	2.90929	2.82775	2.83872	4.09859	3.4841	2.83272	3.28507	3.67005	3.28815	3.16393	3.79656	3.20302	3.33385	3.74323	4.0553	3.70403	3.63838	3.73377	3.94172	3.51745	3.75074	3.75074	3.75074	3.66756	4.12663	4.03364	3.61565	3.98322	3.30552	4.44375	4.04994	3.46952	2.83356	3.42822	4.18145	3.76413	2.31997	3.7132	4.05529	3.86307
OR7E100P	5.0599e-06	-5.29586	0.000194017	-0.698963	3.4089	4.70522	3.83807	1.98513	3.77741	4.3941	3.45561	4.38245	2.98711	4.41186	3.30553	2.80252	3.30293	4.19848	3.91078	4.6075	4.21499	4.42855	3.2509	3.07528	2.52788	1.66581	3.15144	3.05113	3.35877	3.23441	3.23441	3.23441	4.01247	2.78909	3.15212	3.10218	3.17463	3.30552	2.33807	2.79802	3.2325	3.09025	3.98153	2.37423	2.77798	4.24651	2.90444	2.80631	3.81638
TAF4B	5.07765e-06	-5.29434	0.000194385	0.684081	3.69249	3.62686	3.61649	2.63076	2.31843	2.34394	2.58343	3.1171	2.95671	2.60487	3.57393	3.37452	3.14469	3.32473	3.98649	2.87977	2.46057	3.42389	3.51421	4.24842	3.91136	3.75758	3.91464	3.6394	3.31102	3.32812	3.32812	3.32812	3.16895	4.07259	4.04945	3.69779	3.98322	3.94183	4.17864	3.67583	2.47584	2.70124	3.54223	4.00618	3.52127	3.30346	4.11166	3.7972	3.44504
FES	5.08585e-06	-5.29364	0.000194387	-0.629073	6.50408	7.95292	6.51513	7.34527	7.21436	7.1674	6.95281	6.48073	6.11744	7.09489	7.48837	7.37842	6.60572	6.12219	6.53031	6.78453	6.48049	7.78856	6.3504	6.03108	6.11818	5.82068	6.34535	6.37556	7.05341	6.00397	6.00397	6.00397	7.05029	5.80007	5.72559	6.37297	5.45467	5.72843	5.60308	5.69028	6.87292	6.27887	6.73358	6.24991	6.45952	7.27089	5.74986	5.55264	6.97286
NR1D2	5.13643e-06	-5.28934	0.000195931	0.594196	4.41365	3.53677	4.65607	3.2964	3.46402	3.20804	3.16819	4.26835	4.02725	3.54274	3.59016	4.54818	4.58536	3.0685	4.12694	4.18318	3.96417	4.62079	4.62348	4.5027	4.67111	4.4724	5.17841	4.50852	3.80037	4.77774	4.77774	4.77774	3.51971	4.98898	4.71209	3.55327	4.79905	4.52314	4.15888	5.08403	4.22876	3.56658	3.77117	4.78893	4.53885	3.61058	5.17553	4.76148	4.13827
ZNF48	5.15391e-06	-5.28786	0.000195931	0.548674	2.4529	2.02134	2.29392	2.26211	1.79267	1.31276	2.13114	1.94673	1.88191	2.05952	1.77311	1.99911	1.85196	2.80929	1.80433	1.95092	1.30647	2.1235	2.66961	2.75151	2.87062	2.81626	2.53897	2.7221	2.70868	2.38211	2.38211	2.38211	1.72755	3.02077	2.76865	2.32082	2.80401	2.43116	3.13611	2.39871	1.92779	2.68576	2.00318	2.73297	2.77798	1.29622	2.85036	2.66084	2.28314
LINC01506	5.16288e-06	-5.28711	0.000195931	-0.898602	3.01035	2.78971	4.13671	2.97625	3.48796	4.10234	3.39369	4.5905	2.95671	3.25776	3.32506	2.66745	3.27907	3.49488	3.6013	4.6453	3.95167	3.24683	2.74846	2.29352	2.34593	0.486358	3.24211	2.37077	2.21064	2.46211	2.46211	2.46211	2.56062	1.49467	2.11563	2.04208	2.16643	3.46968	1.48476	2.6813	2.63279	3.19237	3.45911	0.974244	3.17736	3.67078	2.09083	1.91018	2.98649
FANCF	5.16487e-06	-5.28694	0.000195931	0.483666	3.26884	2.76106	2.98767	2.63076	2.65086	2.76667	2.2051	3.07428	3.26033	2.63213	3.50709	2.56982	2.8955	3.0247	2.42856	3.0917	2.84563	3.17321	3.49909	3.2521	3.73554	3.32593	3.51486	3.25645	2.94153	3.52722	3.52722	3.52722	2.91287	3.78401	3.52994	3.16129	3.5452	3.46968	3.74294	3.8955	3.16982	2.74671	2.84339	3.62252	3.4413	2.22278	3.56276	3.30394	2.55746
CSRNP1	5.16733e-06	-5.28673	0.000195931	-0.786952	6.6046	7.19995	6.64574	6.86907	7.18217	8.42237	6.56823	7.49106	5.27551	7.18048	6.63971	6.41736	7.00834	7.15698	7.22395	7.81397	7.60913	7.2766	7.05075	5.79924	5.64402	4.39777	6.92376	7.01282	6.7391	5.90458	5.90458	5.90458	6.69128	5.74391	6.8138	6.05403	6.18672	6.37226	5.19136	6.48719	6.86206	6.54433	6.87257	5.25184	5.07768	6.90793	6.12009	5.9069	7.35982
KRT8P12	5.17697e-06	-5.28592	0.000195985	-0.480454	3.00854	3.7988	2.97814	3.28266	2.4942	3.38121	3.43116	3.26724	3.26033	2.94638	4.48677	3.9214	3.39461	2.4104	2.95366	2.85418	3.53185	3.33385	2.49769	2.9005	2.97989	2.95286	3.21251	2.52437	2.37888	2.96602	2.96602	2.96602	3.14162	2.6484	2.7002	2.89338	3.22169	2.62673	2.66191	3.30706	2.61408	2.76155	2.9075	2.94724	2.7159	2.98568	2.70118	2.71387	2.96096
LINC02207	5.18533e-06	-5.28522	0.000195991	-1.27479	4.76609	3.75588	4.72605	6.12867	6.97755	5.70862	6.46137	4.21514	5.83083	5.16628	6.55539	7.11991	3.89602	4.40048	4.38185	3.67758	4.56622	6.7028	2.98391	4.362	2.97329	2.56662	3.80985	2.74502	5.49006	4.16646	4.16646	4.16646	4.84505	2.20918	3.28491	4.43526	2.78325	3.81148	3.56425	1.96053	5.24829	5.80715	5.33616	2.43229	4.21896	5.90616	3.42152	4.0757	4.22661
BUB1	5.19775e-06	-5.28418	0.000196149	1.00823	3.7815	3.31819	2.81647	3.79922	1.67246	2.12756	1.98763	2.81291	2.51717	2.98918	3.61418	2.44689	2.26214	3.31567	3.36644	3.15595	2.83205	2.25419	3.99033	5.25351	4.15218	3.61661	2.75964	3.93177	4.02416	3.73874	3.73874	3.73874	3.63526	5.25164	3.65403	4.45901	3.28213	3.93543	3.52877	2.83491	2.25209	3.10196	4.50411	4.02753	2.77798	3.72147	3.77673	3.2511	3.60192
KLF5	5.23647e-06	-5.28096	0.000197298	-0.876213	4.5753	6.76583	4.46126	4.85355	5.13659	4.48296	4.08423	5.9783	3.21824	4.00053	6.18504	5.22993	3.86964	4.48774	4.48986	5.55138	5.83537	6.10834	3.95752	4.22741	3.70801	2.92656	4.21993	4.01896	4.73721	4.07083	4.07083	4.07083	3.84748	4.51894	4.64605	4.47204	3.86962	4.60211	3.06004	3.55572	4.54748	4.42133	5.10376	3.26335	3.78155	6.00739	3.41621	4.05529	4.72317
GAS7	5.25943e-06	-5.27906	0.000197851	-0.91742	8.63893	10.3371	7.81953	9.58964	8.77959	10.0825	9.5716	9.05905	8.56087	9.31674	10.3079	9.92066	7.64557	7.44559	9.29839	8.38396	8.93521	9.75796	8.3296	8.46133	7.63542	7.4806	7.69579	8.73594	8.62064	7.81627	7.81627	7.81627	9.15614	7.4933	7.42284	8.23483	6.95227	8.09959	7.22122	6.61378	8.82547	8.52132	9.37782	7.79088	8.16777	9.74386	7.20711	6.90251	9.31285
LINC00402	5.30572e-06	-5.27526	0.000199278	1.18935	3.1146	3.22686	2.55969	1.91563	2.58579	0.384776	1.62771	2.91351	1.24066	0.203	1.6546	0.294359	2.95694	1.35444	2.67729	1.97487	1.59082	1.4355	3.22356	3.74629	3.20477	2.73775	4.33769	2.82247	2.62188	3.03957	3.03957	3.03957	1.72755	4.18191	3.73446	1.81553	2.95088	3.03893	3.84537	3.53344	3.04965	2.07489	1.8624	3.10281	2.73391	-0.16105	3.8883	3.71287	2.10814
HNRNPA1	5.33432e-06	-5.27292	0.000200037	0.530255	6.50757	6.02327	6.21606	5.67966	5.51128	5.09368	5.63601	5.97102	6.7131	6.04621	6.20495	6.01385	6.37758	6.09067	6.24576	6.24325	6.32676	6.17232	6.56164	6.91759	6.70331	6.47307	6.84639	6.35522	6.02938	6.77043	6.77043	6.77043	6.35095	7.51246	6.44171	6.50305	6.23721	6.14407	6.70128	6.46872	6.15492	5.38176	6.04181	6.92959	6.80611	5.12872	6.70363	6.52308	6.16632
AL138694.1	5.362e-06	-5.27067	0.000200759	-1.12768	1.8399	2.40144	2.7283	1.409	3.13309	2.20335	2.34253	2.3925	0.270016	1.58878	-0.766917	3.47682	2.87442	1.83201	3.17476	4.16768	2.8045	2.81017	1.83308	0.361727	0.386704	1.07065	2.59738	0.923952	0.196513	0.509223	0.509223	0.509223	1.65209	0.616951	1.05548	0.752303	1.7619	2.02347	-0.682158	1.66512	1.29049	2.71656	1.48412	0.254445	-0.194165	2.14002	1.44623	0.0500223	1.21348
GRIPAP1	5.41608e-06	-5.26631	0.000202466	-0.441206	5.43376	6.3231	6.20896	5.64786	5.76135	5.49653	5.67687	6.05188	4.89219	5.81446	5.50675	5.43098	5.50037	5.67509	5.57465	6.18799	5.92926	6.20731	5.76165	5.30623	5.1734	5.02049	5.3832	5.36997	5.49312	5.07988	5.07988	5.07988	5.10296	5.31847	4.92842	4.88628	4.73562	4.94435	4.4135	5.17077	5.44373	5.2003	5.49959	5.44223	5.325	6.09239	5.1771	5.17954	5.55556
AL354877.1	5.44868e-06	-5.26371	0.000203279	-1.15018	3.34059	5.30053	2.63438	3.01	4.10994	5.06687	2.86474	4.57906	1.24066	4.60311	4.14049	4.98369	2.27827	3.54999	4.38185	4.09307	4.345	4.14546	2.91722	2.04407	0.30506	0.749058	2.04643	2.45657	3.84416	1.98177	1.98177	1.98177	3.94556	0.578692	3.24428	3.83319	2.46907	3.44734	0.953616	1.86862	4.28307	4.04426	4.06823	1.5733	2.62229	4.21147	2.27807	1.84828	4.08412
MRPL9	5.45488e-06	-5.26321	0.000203279	0.537349	3.40678	2.925	3.4334	2.26211	2.70293	1.99166	2.06911	2.92561	2.92566	3.25776	2.85975	2.93911	2.9965	3.59561	3.13095	3.2956	3.03536	3.14461	3.86028	3.69621	3.59232	3.56638	3.70218	3.3491	2.90524	3.88378	3.88378	3.88378	2.8691	4.24434	3.7587	3.31957	3.46924	3.71005	3.68427	3.71594	3.04965	2.6383	3.19123	3.89703	3.35663	1.80604	3.68699	3.48266	3.25507
NOC3L	5.49774e-06	-5.25982	0.000204557	0.611014	3.38078	2.52587	3.40524	2.17556	2.51764	2.71582	2.05318	2.74627	3.43955	2.54875	2.96311	3.07578	3.14469	3.28815	3.06263	2.84121	2.56278	3.07558	3.71733	3.65484	3.79282	3.47858	3.61439	3.40772	2.55318	3.65186	3.65186	3.65186	2.23822	3.85375	3.63844	2.6854	3.84979	3.4873	3.60861	4.29912	2.82402	2.68576	2.862	3.77333	3.4358	1.54165	3.98829	3.60469	2.95235
FIG4	5.54018e-06	-5.25648	0.000205815	-0.487738	5.24744	6.31573	5.31959	4.98236	5.5069	5.33462	5.09195	5.99705	5.26107	5.19399	6.10961	6.76025	5.25338	4.97285	5.14985	5.52931	5.57088	5.92287	5.16141	5.3425	4.80521	4.59438	5.3428	4.87338	4.60203	5.1779	5.1779	5.1779	4.93535	5.32136	4.49551	4.43526	4.59973	4.62019	4.41628	5.19699	5.27533	5.08407	5.48316	5.04644	4.95825	6.07717	4.9313	4.91658	5.2618
VMP1	5.5798e-06	-5.25338	0.000206965	-0.532678	9.31288	10.3543	9.53247	9.23087	9.85286	10.2712	9.75291	9.77995	9.37988	9.4608	9.55047	9.15485	9.38652	9.24679	9.87633	9.80719	10.1393	10.0263	8.87842	8.77961	8.84307	7.9911	9.12653	9.2265	9.4759	9.17729	9.17729	9.17729	9.42389	8.59994	8.80739	9.01545	9.07414	9.07599	8.09626	8.92875	9.49574	8.99846	9.50907	8.65387	9.21591	10.1243	8.88611	8.60964	9.56329
AGFG2	5.63615e-06	-5.24902	0.000208704	0.628891	4.16431	3.71165	4.13671	2.90631	3.21427	2.71582	3.49152	3.89046	3.9367	4.05191	3.08268	3.84695	4.04021	3.51084	3.58515	3.47421	3.77128	3.26466	4.79734	4.20609	3.95885	4.09332	3.82948	4.204	3.78047	4.35114	4.35114	4.35114	3.25648	5.22092	4.53815	3.94953	4.38915	4.22789	4.41905	4.52666	4.15302	3.58339	3.19123	4.9088	4.621	2.59316	4.88016	4.76358	3.92599
PDGFC	5.6442e-06	-5.2484	0.000208704	-1.09969	3.27279	3.7486	1.84747	3.50007	2.93833	4.17943	2.41911	1.84849	3.14823	2.47538	6.48768	5.90297	2.69371	2.28606	2.95366	3.47421	3.30486	2.60152	3.03723	1.85613	2.16106	3.02075	2.71812	2.95613	2.9144	2.3614	2.3614	2.3614	3.84183	1.99348	2.75907	3.40356	1.90331	2.18339	3.43333	1.29323	3.38376	2.43111	2.70593	2.23438	2.73391	3.46518	1.22117	2.15995	3.10776
TRAJ22	5.75434e-06	-5.24	0.000212366	1.30035	-0.00773651	-3.1008	-0.0169542	-4.36345	-2.10019	-4.36345	-2.82877	-1.72575	-1.20314	-1.83296	-1.99573	-0.184523	0.426111	-0.706112	-0.607436	-0.664443	-1.99628	-1.54073	0.442582	-0.122448	-0.599443	-0.511636	0.264492	-0.667472	-1.8002	0.782841	0.782841	0.782841	-0.710329	0.827372	0.340826	-0.627982	0.627969	-0.152569	0.7574	0.453941	-0.381123	-1.96124	-0.833708	-0.23969	0.729706	-2.03644	0.663166	0.434054	-0.340202
WDR74	5.76104e-06	-5.2395	0.000212366	0.492574	2.61957	2.0453	2.65844	2.17556	2.2218	1.06442	1.73147	1.62934	2.73582	2.19367	2.19013	2.71389	2.19572	2.5405	2.21434	2.08897	2.0081	2.65657	2.79872	2.79022	3.05673	3.27124	3.07128	2.84386	2.51756	2.58334	2.58334	2.58334	2.53284	3.04903	2.96478	2.5445	2.34705	2.52801	2.79585	2.88268	2.22768	2.33515	1.96925	2.87581	2.83751	1.75133	3.00689	2.96057	2.22713
RNF26	5.8462e-06	-5.23313	0.000215172	0.516214	3.58348	3.36654	3.36194	3.21194	2.81126	2.6084	2.99554	2.9613	3.71852	3.10073	2.74842	2.80252	3.31862	3.42921	2.99091	3.62558	2.85909	3.63738	4.46908	3.42198	3.48519	4.04115	4.05881	3.79573	3.63292	3.60417	3.60417	3.60417	3.61553	4.12331	3.87858	3.56791	3.36131	3.46078	4.20777	3.70933	3.02153	2.74671	3.20587	4.09198	3.79448	2.71253	3.5913	3.58585	3.10776
ATXN10	5.89312e-06	-5.22965	0.000216566	0.465602	4.52669	3.83361	4.48163	4.1182	3.90292	4.00686	3.1383	3.78817	4.37634	4.20046	4.29704	3.93453	4.60148	4.36579	4.31978	4.36179	3.96417	4.50179	4.56296	4.77539	4.76188	4.54336	4.54482	4.56434	4.09434	4.91377	4.91377	4.91377	4.18303	5.11963	4.70463	4.23889	4.64647	4.25129	4.64886	4.79356	4.29487	3.86345	4.35113	4.86072	4.78549	3.11047	4.97167	4.63656	4.38536
PHC2	5.91417e-06	-5.22811	0.000217004	-0.879287	9.19645	9.65219	9.40573	10.4918	10.6235	10.369	10.4339	10.0361	8.84176	9.79635	9.65787	9.57716	9.11064	9.05414	9.40771	9.66656	9.93246	10.8562	9.25423	8.61851	8.20303	7.32231	9.08068	8.81539	9.60313	8.56641	8.56641	8.56641	9.31265	7.3657	8.58667	9.15426	8.02924	9.02232	7.51175	7.75772	9.14064	9.31738	9.43039	7.74526	8.28695	10.8777	8.18636	8.21492	9.75062
AC009902.2	5.97121e-06	-5.22394	0.000218761	-0.693075	1.66251	2.925	1.64562	1.30411	2.33172	2.95386	2.51529	2.14599	1.48744	1.91161	2.77707	1.59818	1.66822	1.69901	1.80433	1.77116	2.4428	2.48466	0.377922	1.43537	1.5665	0.749058	0.905799	1.4274	2.02015	1.40565	1.40565	1.40565	2.25532	1.19926	0.991463	1.54665	1.03162	1.52312	0.7574	0.88769	2.07186	2.33515	1.82494	0.286276	0.96142	2.49667	0.626856	1.17555	2.22713
SELL	6.04001e-06	-5.21896	0.000220942	-0.752776	11.6808	12.4291	12.2385	12.0436	12.7648	13.045	10.8881	12.2294	10.7769	12.2245	12.8341	11.872	11.6337	11.3995	12.0217	12.558	12.8279	12.3291	12.0667	11.1458	11.2421	10.0144	11.6716	11.2768	11.947	11.1832	11.1832	11.1832	11.7621	10.922	11.375	11.1699	11.0321	11.8897	10.4563	11.1676	11.2496	12.0451	12.2411	10.5333	10.1042	12.6342	11.1397	11.1868	12.3652
GLOD4	6.06453e-06	-5.2172	0.000221499	0.549512	4.10752	3.59474	3.85378	3.01	3.43353	3.01122	3.12312	3.47082	4.2525	3.78061	3.55751	3.40315	4.17561	3.8363	3.70206	3.96741	3.53185	3.92773	4.53728	4.17717	4.33298	4.30892	4.69682	4.0469	3.79542	4.44518	4.44518	4.44518	3.82475	4.93321	4.43663	3.67994	4.20628	4.05253	4.25195	4.75237	3.75218	3.6	3.65325	4.44737	4.1964	2.20253	4.48315	4.36537	3.5685
DCPS	6.09536e-06	-5.215	0.000222285	0.50445	4.54887	3.95873	4.65009	4.10265	3.89846	3.48609	3.62145	3.83382	4.50795	4.40397	4.04948	3.84695	4.47066	4.16357	4.07007	4.54089	3.90053	4.42855	5.1686	5.4791	4.76951	4.70942	4.56252	4.52847	4.39515	4.801	4.801	4.801	3.89736	5.00889	4.21978	4.55519	4.34733	4.63014	4.82424	4.62474	4.05237	4.17197	4.74874	4.71045	4.45717	3.53971	4.80089	4.5686	4.25839
PARP1	6.13243e-06	-5.21237	0.000223077	0.533948	5.52416	5.41988	5.61374	5.11618	4.71272	4.10234	4.23308	4.87568	5.48882	5.24565	5.03258	5.27709	5.20987	5.18418	4.79371	5.06057	5.15974	5.38881	6.28798	6.29864	5.75195	5.46017	5.78991	5.65799	5.24892	5.6337	5.6337	5.6337	5.04267	6.5033	5.12398	5.20462	5.08433	5.32246	5.25322	5.5157	4.90774	4.77588	5.4139	5.98847	5.78962	4.76442	5.79146	5.80365	5.24779
MDFIC	6.13579e-06	-5.21213	0.000223077	0.628438	5.34702	4.57548	5.06668	4.39213	4.52589	4.53766	4.14938	5.04326	5.47816	4.77501	4.46932	4.52666	5.2976	4.71142	4.83184	5.19661	4.93359	5.19786	5.8084	5.52143	5.22148	5.30545	5.71274	5.00261	4.60768	5.92854	5.92854	5.92854	4.6616	6.2192	5.98286	4.98046	5.84113	5.24298	5.55098	6.03756	5.26037	4.11532	4.61249	5.87333	5.34857	3.48207	6.04296	5.88298	4.67949
AC005899.6	6.1854e-06	-5.20863	0.000224424	-0.647593	1.23676	1.86857	2.04291	1.68444	1.11904	1.74347	2.05318	2.12516	0.857579	1.86641	1.00201	2.04827	1.95594	1.35444	1.14377	1.74355	1.55819	1.72028	1.4484	1.45959	0.50111	0.666694	0.478525	0.883218	0.968648	0.751345	0.751345	0.751345	0.929912	1.06732	-0.376507	-0.110323	0.317335	0.862985	0.210186	0.97843	1.193	2.12166	1.35868	1.10494	0.96142	0.627592	1.31545	1.07102	1.06163
TLR8	6.19165e-06	-5.20819	0.000224424	-0.847437	8.8211	10.0028	8.31048	9.51247	9.61184	10.1274	8.82799	9.12528	8.3507	8.99825	10.9262	9.83341	8.63799	7.66607	9.57148	8.69834	9.49994	10.0527	8.628	8.28108	7.5081	7.56403	8.53436	8.02518	8.63974	8.64377	8.64377	8.64377	9.28221	7.84619	8.40777	8.33217	7.83738	8.15733	7.05971	7.63538	9.43174	8.96859	9.1482	7.53985	7.90453	10.0583	7.48358	7.95893	9.16104
IGLV3-25	6.22509e-06	-5.20585	0.000225197	2.47621	4.84491	2.26526	3.18277	4.08693	-3.39983	0.384776	1.14705	1.01094	1.79294	4.74722	4.03769	1.92208	0.783518	1.24418	1.45934	0.425131	2.168	2.34079	4.15857	7.12112	4.23993	2.10168	-0.793679	5.0835	3.86793	2.67851	2.67851	2.67851	3.04658	1.22426	2.64925	6.36391	4.94172	5.30144	4.55121	2.16755	0.318861	4.41664	5.39326	4.52279	1.35972	2.78241	2.68361	4.51482	3.96504
AC073575.1	6.23187e-06	-5.20538	0.000225197	-0.750465	1.65752	3.10677	2.11423	1.68444	1.98998	2.29858	1.34324	2.79982	0.512225	2.1377	1.00201	1.63082	1.7164	2.52486	2.08254	2.81492	2.88563	2.45391	0.239198	1.22538	1.1418	1.25107	1.50289	0.923952	1.6983	1.25658	1.25658	1.25658	0.648557	1.38809	1.43825	1.33479	0.718241	1.39825	-0.135177	1.66512	1.62548	1.72718	1.35868	1.08697	0.316786	2.37529	1.19661	1.01577	2.04474
FTSJ1	6.25427e-06	-5.20382	0.000225394	0.488694	3.72824	3.03678	3.7	3.31001	2.59684	3.03906	3.04471	3.14841	3.63139	3.6797	3.07116	2.84487	3.28707	3.81717	3.56059	3.58726	3.20302	3.74292	4.40156	4.08286	3.74718	3.69662	3.76469	3.84958	3.94593	3.92318	3.92318	3.92318	3.64178	4.18827	3.7098	4.07095	3.57571	3.53469	4.15556	3.84815	3.28075	2.71656	3.67972	4.1385	3.89397	2.60863	3.8612	3.68658	3.54578
MCEMP1	6.25621e-06	-5.20369	0.000225394	-1.44233	6.0999	7.05185	4.75143	6.47515	6.93464	8.81278	4.77976	5.62658	3.66938	6.94056	8.89746	7.97183	5.06391	6.35663	7.66279	5.7078	6.18571	6.25937	6.09907	4.72382	5.24903	3.36563	4.62843	5.99077	6.47929	4.54039	4.54039	4.54039	6.60636	3.25715	5.96838	5.50001	4.07576	6.28929	2.3025	3.70269	7.38643	5.98526	6.51066	3.73636	2.99519	6.08963	4.40758	3.92266	7.44668
VPS9D1-AS1	6.2707e-06	-5.20268	0.000225575	0.901182	1.01685	1.19663	0.321183	-0.029688	0.209717	-0.261442	-0.187506	0.763856	-0.286173	-0.963545	0.61455	-1.10699	0.366977	0.514196	1.00503	-0.523591	0.17154	1.19634	0.675634	1.85613	1.37973	1.60075	0.0801588	0.753624	0.896531	0.35012	0.35012	0.35012	0.541098	1.79085	2.10053	1.13959	1.28893	1.63804	1.70053	0.575201	-0.238277	0.12395	0.747839	0.808772	1.65269	0.432747	1.17162	1.38626	0.657745
GRB10	6.30004e-06	-5.20066	0.000226289	-1.25709	5.47627	5.50009	3.78987	7.3908	5.8367	6.3253	6.89253	6.34207	4.41038	6.47014	7.66975	7.84932	4.73901	4.67292	6.59523	4.8174	5.24677	6.43401	4.69489	4.98807	4.05251	4.23939	3.62566	3.96143	5.60342	4.39256	4.39256	4.39256	5.30124	2.97732	4.50414	5.78007	3.48218	4.77351	3.67038	2.99562	5.62287	5.89895	5.72346	3.60053	3.88996	7.75392	3.52872	3.32682	5.36434
ERLIN1	6.34498e-06	-5.19757	0.000227145	-0.974642	5.44895	7.34997	4.84088	6.25012	6.36297	6.77883	6.27818	5.98265	4.72791	5.63574	7.30503	6.01848	4.80176	6.14282	5.03568	5.21934	6.25732	7.53442	4.71467	4.74121	5.03465	5.34737	4.94642	4.40081	5.34858	4.81059	4.81059	4.81059	5.17437	4.98166	4.41849	5.23398	3.85974	4.36291	4.1655	4.2083	4.9971	4.47634	5.48165	4.80138	4.16687	7.9481	4.41025	4.29169	5.77286
SERPINA1	6.35158e-06	-5.19712	0.000227145	-0.725604	10.67	11.5069	10.3669	11.8159	11.8284	11.9116	11.1251	10.7098	10.217	11.174	11.9301	11.1816	10.6215	10.1216	10.9039	11.2524	10.9694	11.3783	11.2407	10.3394	9.63529	9.17365	10.729	10.7578	11.0607	9.95984	9.95984	9.95984	11.1305	9.45053	10.543	10.1882	9.4503	10.6559	9.44097	9.59097	10.862	11.1524	11.1694	9.69393	10.0061	11.2922	9.72568	9.57681	11.4075
WWP1	6.35807e-06	-5.19667	0.000227145	0.476554	5.50839	5.47384	5.28523	4.36631	4.91389	4.82039	4.31219	5.03491	5.64632	4.96389	5.36769	4.92238	5.54774	5.11015	5.05632	5.20422	5.14882	5.04116	5.82517	5.64011	5.40289	5.49041	6.00369	5.53355	4.98336	5.78912	5.78912	5.78912	5.40066	6.31976	5.72436	5.0218	5.55301	5.18206	5.32293	5.74785	5.53608	4.40724	5.1762	5.8694	5.66723	4.71881	5.75617	5.59331	5.29963
RAB43	6.36366e-06	-5.19629	0.000227145	-0.535741	3.20816	3.78463	3.19104	3.65738	3.78226	4.26446	3.83218	3.48723	2.57168	3.45386	3.24529	3.87447	3.69431	2.68818	3.49298	3.76943	3.97657	3.85309	3.42901	2.93547	3.05048	2.46061	3.03792	3.07845	3.5413	2.71978	2.71978	2.71978	3.09488	2.84657	2.58563	3.43051	2.21375	2.83379	2.09639	2.4312	3.36149	3.57501	3.60986	2.51522	2.98017	4.13874	2.79416	2.47874	3.29648
HSF2	6.37892e-06	-5.19525	0.000227145	0.616344	2.57126	1.50381	2.19869	1.55328	1.26473	1.70922	1.67012	2.44387	2.48912	1.72163	2.07947	2.0239	2.58114	2.17024	2.29597	2.6161	1.59082	1.93593	1.92647	2.73175	3.09973	3.19982	3.17465	2.37077	2.07018	3.05255	3.05255	3.05255	2.35388	2.97732	2.74942	1.50669	2.69707	2.5365	2.83787	3.08001	2.5167	1.42552	1.98632	2.86003	2.8123	1.8844	2.87379	3.0731	2.40173
CD53	6.38223e-06	-5.19503	0.000227145	-0.499582	9.64934	10.3374	10.018	9.95079	10.2256	10.4202	9.55826	10.1752	9.29422	9.94737	10.3237	10.1088	9.57469	9.72452	10.0395	10.0018	10.297	10.6722	9.81039	9.47958	9.13162	8.7288	9.68345	9.67219	9.70873	9.37203	9.37203	9.37203	9.81808	9.00381	9.25733	9.49002	9.35623	9.76115	8.9176	9.22287	9.87498	9.61104	9.88255	9.07261	8.99202	10.6961	9.18575	9.14441	9.82643
TTLL3	6.39769e-06	-5.19398	0.000227145	-0.433834	5.76314	6.54309	6.10774	5.90261	5.77357	5.74501	6.5176	6.27037	5.7811	6.03348	6.38789	6.57348	5.81025	5.4095	6.07996	6.05531	5.95924	6.02186	5.74091	5.64143	5.14875	4.74749	5.29242	5.30976	6.11628	5.6752	5.6752	5.6752	5.86487	5.25619	5.22487	5.55124	5.21216	5.36955	5.18649	5.30394	6.37231	5.77825	5.6014	5.37629	5.90342	6.09651	5.44425	5.43911	6.07309
IGLV1-44	6.40623e-06	-5.1934	0.000227145	1.85865	4.33728	2.0453	4.73739	3.5696	-2.82721	2.3661	2.17597	0.530334	2.74771	3.84611	3.24529	1.72454	2.32563	1.1248	1.45934	1.43377	2.14622	4.97771	6.29128	5.27585	4.67111	2.68642	1.23502	4.41517	1.76057	4.25896	4.25896	4.25896	3.17794	2.02227	4.7537	4.95841	4.32954	5.11136	5.10968	2.88268	0.318861	2.70124	5.21833	3.30279	2.5731	2.71253	6.7985	2.15995	4.93902
MSL3	6.40959e-06	-5.19317	0.000227145	-0.731842	7.5482	8.23725	7.15399	7.97403	8.36254	9.08759	8.04982	7.91399	6.68941	7.76663	9.02069	8.374	7.67368	6.91756	8.21522	7.50831	8.35399	8.09766	6.92061	6.90331	7.04449	5.89492	7.31085	6.96604	7.56065	7.08228	7.08228	7.08228	7.76296	7.13552	6.94476	7.18353	6.91756	6.98396	6.31835	7.3168	8.32785	7.38949	7.6577	6.43523	6.71496	8.60501	6.82828	6.89679	8.00313
UGCG	6.4351e-06	-5.19144	0.000227711	-1.14906	6.69097	7.39379	5.47499	7.54116	7.2946	9.524	5.91697	7.22902	4.53221	7.34759	8.69725	6.96292	5.90553	7.2976	8.17061	6.68734	6.57525	6.36955	6.17953	5.48796	6.30434	4.35895	5.9509	6.0169	7.13598	5.47042	5.47042	5.47042	6.47201	5.58893	6.67676	5.29683	5.7664	6.05602	4.58368	5.21343	7.47852	5.92885	6.94964	4.83808	5.10735	7.84981	5.75617	5.41395	7.84204
AC007271.1	6.48407e-06	-5.18815	0.00022902	-1.32549	5.31067	5.7001	3.91997	6.53865	6.00998	6.80947	7.22449	5.50287	4.94477	6.75227	6.72305	7.89203	4.11849	4.07509	6.21985	5.67346	5.36701	6.43794	3.89535	4.68325	2.80531	1.43648	4.24572	4.17054	5.4793	3.21145	3.21145	3.21145	6.0342	1.77402	3.7098	5.43497	2.60542	4.84873	2.40668	2.59789	6.10889	5.88547	5.62747	1.7549	4.53372	6.9196	3.22298	2.84645	5.5384
TRAJ40	6.49131e-06	-5.18767	0.00022902	1.28072	-0.186276	-1.36402	-0.0952508	-2.81923	-1.83965	-2.28127	-2.82877	-1.72575	-1.20314	-0.669215	-2.4473	-0.730199	0.028358	-1.73975	-1.37244	-1.70179	-2.44779	-2.58525	-0.506746	0.309375	-0.4502	-0.24927	-0.057269	-0.551248	-2.38298	0.5464	0.5464	0.5464	-1.59998	0.457421	0.532977	-1.15978	-0.627484	0.564009	0.309095	0.389261	-1.44124	-2.41581	-0.958773	-0.598049	-0.496185	-4.36345	-0.192471	0.630745	-0.725963
EXOSC5	6.55261e-06	-5.18359	0.000230842	0.641668	1.97261	1.50381	1.9485	1.191	1.17909	0.829492	0.772023	0.530334	2.13816	1.20891	0.549614	1.2655	2.16132	2.22931	1.31017	1.16901	1.22568	1.77107	2.1559	2.32023	2.3561	2.44834	2.41454	1.66221	1.91457	1.76233	1.76233	1.76233	1.95392	2.53309	2.38845	2.13674	2.04958	1.89731	2.61435	2.18671	1.33687	1.89811	1.43525	2.21797	2.31042	0.361476	2.44378	2.06789	0.855421
H2AC12	6.57551e-06	-5.18207	0.000231084	1.16055	2.73837	2.24472	2.09673	3.24065	-0.624414	-0.131596	1.11671	2.16652	1.42959	1.09595	1.59148	1.5306	0.482917	1.95378	2.08254	1.79825	1.82824	2.30677	2.73561	3.82764	3.67994	2.05387	0.868336	3.47094	3.55308	2.65317	2.65317	2.65317	2.40074	4.07259	2.58563	3.78389	3.20617	2.94	3.44425	1.29323	0.719782	2.00176	3.06036	2.59363	1.65269	2.07467	2.62038	1.36431	1.73912
KLF7	6.58849e-06	-5.18121	0.000231084	-0.718638	7.56668	8.5577	7.37881	8.10371	7.77566	8.40241	8.24456	7.33031	7.58112	7.77391	9.39973	8.73769	7.21999	6.58677	8.50421	7.51599	8.03708	7.72478	7.11353	7.18244	6.71274	6.11277	7.04046	6.84731	7.97623	6.95586	6.95586	6.95586	8.14111	6.56515	7.11169	7.62084	6.84803	7.05031	6.89334	6.41186	8.07088	7.56896	7.78293	6.49476	7.63058	8.29776	6.60791	6.54093	7.71608
ERI1	6.58855e-06	-5.18121	0.000231084	-0.739649	4.91524	7.19661	4.09324	4.51471	4.69483	5.93113	4.04046	5.99131	4.20156	4.93407	6.22977	5.37186	4.17561	5.11799	5.16893	5.14213	6.01139	5.72295	4.44561	4.85744	4.55891	4.41994	4.19744	4.98828	4.97244	4.27842	4.27842	4.27842	4.78449	4.9237	4.78472	4.41381	4.3579	4.65959	3.68887	4.50774	4.99348	4.57627	5.01716	4.435	4.05309	6.44137	4.28769	3.9189	5.53696
CD320	6.61847e-06	-5.17924	0.000231609	0.662927	3.20419	2.76106	3.08852	3.22637	1.49482	1.40125	2.74091	2.93761	3.10268	2.96794	1.8289	2.61946	2.90592	2.08751	2.29597	2.84121	2.59531	2.60152	3.97402	4.04333	3.76255	3.28511	2.64247	3.79573	3.45606	3.29027	3.29027	3.29027	2.77737	3.52702	3.31791	3.82509	3.10104	3.69116	3.48713	3.15	3.20775	2.79078	2.74656	3.61627	2.43678	2.6836	3.74743	3.40953	2.91738
AL138995.1	6.62294e-06	-5.17895	0.000231609	-0.717276	2.27356	2.34464	2.27848	1.91563	2.89423	3.83484	4.11526	3.23844	2.32429	2.90227	2.54691	2.22969	2.32563	1.95378	2.12782	3.18704	1.71441	2.68334	1.73323	2.44679	1.53103	0.437518	2.45301	1.24652	1.93271	1.79359	1.79359	1.79359	1.93282	0.654222	1.81633	2.24998	2.34705	2.15059	1.01351	1.52162	1.66237	2.05092	2.69559	1.48004	2.04782	2.97378	1.36037	1.60793	2.67726
GATA3	6.66463e-06	-5.17622	0.000232725	0.765835	3.95627	3.32799	4.15374	1.68444	3.11783	2.17853	2.76066	3.64187	3.70029	3.7056	3.03603	2.4831	3.75323	3.30656	3.15302	3.73479	3.33406	3.18262	4.95249	3.8958	3.84791	4.1738	4.25301	3.85486	3.51143	4.39511	4.39511	4.39511	2.97613	5.15093	4.60653	3.53352	4.2561	3.80798	4.34522	4.27247	3.36149	3.56658	2.48361	4.71923	4.46528	2.72677	4.48315	4.50231	3.31002
TYW1	6.68969e-06	-5.17459	0.000233259	0.496573	3.55122	3.37602	3.41234	1.80466	2.70293	2.49233	2.7898	2.79982	3.56577	3.51372	2.96311	3.41257	3.56215	3.2023	3.22772	3.44879	2.84563	3.24683	3.96304	3.88243	3.54864	3.73249	4.02941	3.72257	3.01149	3.77834	3.77834	3.77834	3.00675	4.1066	3.57432	3.35376	3.40953	3.29555	3.56924	3.74854	3.29256	3.01792	3.22037	3.88668	3.66433	2.37529	3.97751	3.69099	3.3499
TRBV27	6.73525e-06	-5.17165	0.000234505	1.3576	0.317922	-0.931081	0.436982	0.531227	-2.10019	-4.36345	-2.42014	-0.846578	-1.20314	-3.22961	-1.99573	-1.61838	-0.765681	-0.861814	-0.764075	-0.820548	0.255338	-1.11477	0.310227	0.139856	0.0281053	0.826972	0.375474	-0.162117	-1.57843	0.930765	0.930765	0.930765	-1.59998	0.981949	0.924469	-0.460209	0.196909	-0.326409	1.15319	0.88769	0.0109122	-0.727732	-1.8286	0.435678	0.363819	-3.13743	1.67683	0.898486	-0.520227
ABHD14A	6.779e-06	-5.16883	0.000235684	0.732339	1.21555	0.493903	1.29286	0.435151	0.025704	0.469077	-0.187506	0.326472	0.270016	0.639025	0.172184	1.17985	1.24418	0.800535	-0.607436	0.791546	0.735609	0.297605	1.59783	1.48341	1.70026	1.53263	1.55098	1.50999	0.896531	1.01275	1.01275	1.01275	0.699427	1.43167	1.55358	1.26464	1.90331	1.68461	2.47218	1.77046	0.788143	1.04365	-0.0987905	1.36551	1.05036	-0.0597428	1.90622	1.69844	0.927483
SNHG4	6.81977e-06	-5.16623	0.000236693	0.709876	1.92316	1.604	1.26178	1.06825	0.652524	0.0975504	0.650219	1.01094	2.10158	0.341579	1.2673	1.63082	1.54024	2.02219	1.9118	1.36295	0.900849	1.4355	1.92647	2.57428	2.27265	2.05387	1.29272	2.35597	1.74011	1.99527	1.99527	1.99527	1.20099	3.11735	2.59643	1.56622	2.49484	1.80194	2.15074	1.89216	1.76771	1.46233	1.55446	2.306	1.74441	0.687101	1.84432	1.58913	1.45205
MYO1D	6.82787e-06	-5.16571	0.000236693	0.81089	3.90088	3.32799	3.39812	3.8373	2.51764	2.76667	3.23327	2.47713	3.78347	3.56414	3.1167	3.08759	3.15347	3.04677	3.10853	2.86703	3.45419	2.81017	4.60594	5.4355	3.70005	3.77242	2.97762	3.93676	4.11832	3.78225	3.78225	3.78225	3.84748	3.40113	3.90053	4.26906	3.41629	4.35093	4.1949	3.39205	3.16982	3.52369	4.20935	4.11875	3.55205	3.61824	4.20698	3.28069	3.60741
ATP11A	6.84331e-06	-5.16473	0.000236884	-0.536262	8.52675	9.38323	8.49861	8.75414	8.93449	9.40331	8.76962	8.74962	8.46017	8.89653	9.9937	9.06067	8.42801	8.05699	8.79309	8.606	9.0008	9.0688	8.62234	8.41814	7.96856	7.35843	8.39558	8.04667	8.8269	8.21406	8.21406	8.21406	8.3204	8.03331	8.10837	8.47685	7.70841	8.06443	7.7847	7.66471	8.84916	8.52296	8.82028	7.87538	8.32142	9.15593	7.77815	7.83374	8.79073
ZNF33B	6.89319e-06	-5.16158	0.000238265	0.576123	4.07827	2.91203	4.15374	2.92412	3.3576	2.96841	3.26128	3.65646	4.30171	3.35096	3.927	3.81889	4.08677	3.32473	3.56059	3.69209	3.27506	3.76814	4.46908	4.25189	4.23993	3.96996	4.4655	3.60223	3.24721	4.54958	4.54958	4.54958	3.05637	4.62599	4.22326	3.40899	4.5329	4.14148	4.1819	4.74269	3.86726	3.34799	3.45298	4.17934	4.3677	3.00918	4.63941	4.3459	3.56285
IGLV3-27	6.92143e-06	-5.1598	0.000238894	2.91904	2.00585	-1.13137	-0.459418	1.13093	-2.82721	-1.8146	0.207438	-1.2202	-0.192346	-0.215989	-1.14274	-1.10699	-1.42532	-2.0788	-0.607436	-0.395276	-0.469668	-0.786333	0.442582	1.50685	-1.17068	-0.832562	-2.78952	1.73269	2.26893	-1.25112	-1.25112	-1.25112	-0.466535	-2.25755	0.0578933	1.67838	-0.420644	4.21473	1.17957	-0.918616	-1.79419	0.65588	-1.60766	1.01281	-1.25135	0.565522	0.15219	-1.17377	-0.180169
NUP35	6.93713e-06	-5.15882	0.00023909	0.571644	2.58111	1.4688	2.43988	1.45871	1.31913	2.15327	1.46865	1.92279	2.55824	2.05952	2.37015	2.20822	2.75265	2.49307	2.27599	2.06686	1.55819	2.06364	2.33689	2.9696	2.68136	2.85397	3.11192	2.44262	1.87758	2.79121	2.79121	2.79121	2.53284	3.30481	2.84309	2.42096	3.18258	2.67367	2.60464	3.05937	2.61408	1.78644	1.64321	2.87581	2.77798	1.0003	2.82654	2.8855	2.62403
TMEM204	7.04018e-06	-5.15242	0.000242292	0.882851	3.0652	1.99697	3.50149	2.17556	2.29147	0.695928	1.49248	2.20673	2.82827	1.81974	1.88262	1.17985	3.30293	1.93023	1.49434	3.10261	2.10163	2.19962	4.55201	2.87371	3.12968	3.39151	3.15922	2.77872	2.55318	2.68686	2.68686	2.68686	2.70453	4.26858	3.80133	3.33106	3.04981	3.07435	4.01246	3.06973	3.2325	2.12166	1.93451	3.00098	4.14347	1.47568	3.28255	3.28654	2.80709
STS	7.06532e-06	-5.15087	0.000242807	-0.649844	4.35117	4.20196	4.76535	4.68625	5.14602	4.85606	5.56054	5.20583	5.53413	4.52526	4.63499	4.81285	4.23882	4.64427	3.99873	4.81408	4.76514	5.52635	3.58036	4.43712	3.66366	4.28151	4.48419	3.46405	4.08626	4.58127	4.58127	4.58127	3.84183	3.7798	3.56885	4.08459	3.86469	3.90297	3.25253	4.09119	3.51057	4.34946	4.26635	3.75354	3.96433	5.97791	3.54827	3.69978	4.19776
SDAD1	7.10559e-06	-5.1484	0.000243573	0.529962	4.4894	3.92684	4.62589	3.62509	3.80149	3.63949	3.21906	3.96854	4.6124	4.00053	4.07277	3.74627	4.63946	3.91037	4.07007	4.325	3.80643	4.32188	4.95526	4.79456	4.57859	4.79673	4.83432	4.60875	3.80037	4.92087	4.92087	4.92087	3.93499	5.37816	4.39393	3.86514	4.46281	4.33154	4.41628	4.99174	4.22876	3.80016	4.15001	4.9652	4.55667	2.91276	4.75537	4.68607	4.06427
SLA	7.10804e-06	-5.14825	0.000243573	-0.760071	9.62954	9.71876	9.77528	10.1107	11.112	11.1838	10.2706	9.87648	8.70443	10.2743	10.6337	9.79904	9.75451	10.02	10.1003	9.97788	10.1114	11.0364	9.69123	9.2138	8.75622	7.75458	10.0593	9.36676	9.99423	9.38371	9.38371	9.38371	9.80779	8.5884	9.01824	9.15254	8.73366	9.25473	7.92653	8.88214	10.0173	9.3666	9.96328	8.49854	8.50226	10.8956	9.23728	8.93176	10.507
GORASP2	7.16888e-06	-5.14455	0.000245305	0.396991	5.66737	5.61261	5.63056	5.34491	4.95741	4.93228	4.83438	5.36531	5.55964	5.34991	5.44113	5.36945	5.531	5.36629	5.2221	5.34867	5.33848	5.81053	6.12393	6.15677	5.55191	5.54619	5.80981	5.65648	5.43544	5.97103	5.97103	5.97103	5.47371	6.17019	5.72805	5.47046	5.31157	5.90929	5.76538	5.62507	5.19262	4.98952	5.59724	5.91402	5.67657	5.32647	5.70375	5.55264	5.44174
MBLAC2	7.18596e-06	-5.14352	0.000245537	0.619541	2.66578	1.63591	2.32432	1.68444	2.07146	1.90352	1.46865	2.3026	2.41652	2.22981	2.05629	1.97389	2.56807	2.42732	2.42856	2.29322	2.03206	1.82013	2.38704	2.77099	2.92629	2.88162	3.13576	2.48407	2.07018	3.27374	3.27374	3.27374	2.13113	3.06987	3.02997	2.11032	3.14239	2.62673	3.0168	3.33309	2.43378	1.63346	1.30529	2.91196	2.67918	0.903261	3.31714	3.08657	2.48767
FGR	7.21024e-06	-5.14205	0.000246015	-0.62536	9.57912	10.6723	9.7469	10.546	10.1424	10.5504	9.59061	9.56018	9.1369	10.2099	10.6372	10.2577	9.48019	9.14643	10.2143	9.42178	10.137	10.0865	9.43977	9.55941	8.86772	8.45456	9.27181	9.30943	9.76914	9.17617	9.17617	9.17617	10.0371	8.64837	9.22876	9.72351	8.47832	9.42687	8.9287	8.56305	9.92648	9.8071	10.2538	8.87294	9.2597	10.5414	8.96379	8.49878	9.9398
ATF7IP2	7.31654e-06	-5.13569	0.000249285	0.626417	4.41493	3.50256	4.2199	2.49439	3.1482	3.32576	2.99554	3.74786	4.30975	4.07196	3.66105	4.2866	4.44587	4.08578	4.63416	4.21871	3.44529	3.5309	5.01229	4.42794	4.2094	4.29185	4.63402	4.17476	3.7501	4.48402	4.48402	4.48402	4.086	5.08422	4.77048	3.93078	4.52666	4.34369	4.66995	4.84873	4.34111	3.94373	3.72617	4.77638	5.01276	2.79598	4.89931	4.74883	4.17943
SIT1	7.34975e-06	-5.13373	0.000250059	0.74885	3.69477	2.97575	3.84856	2.65228	2.37087	1.52457	2.13114	3.61971	3.85114	3.30087	2.49612	3.41257	3.60116	2.78324	2.87616	2.81492	2.76215	2.61548	4.18243	3.85985	4.16091	3.89957	3.74931	3.93676	3.18045	3.8765	3.8765	3.8765	2.84671	5.01607	4.26786	3.48807	4.38571	4.11622	4.36547	4.31227	3.45908	2.79078	2.56537	4.16443	3.71962	2.24275	4.27014	4.26825	2.81661
IGFBP7	7.38839e-06	-5.13145	0.000251016	-0.563334	3.4053	3.04868	3.52131	4.12592	3.69753	3.94197	2.87383	3.58961	3.34883	4.20046	4.45166	4.76587	3.19656	4.22291	3.37585	3.98521	3.39998	3.57444	3.00548	2.48269	3.77777	3.22162	3.23476	3.5049	3.5472	3.76658	3.76658	3.76658	3.08535	3.06987	3.40035	3.2426	3.44301	2.56997	3.65636	3.00644	2.75738	3.46142	3.45911	3.56853	2.59298	2.92517	3.24111	3.11313	3.31674
KDM6A	7.40759e-06	-5.13032	0.00025131	-0.479001	7.05203	7.36968	7.18797	7.12529	7.21973	7.96107	7.46097	7.38061	7.22717	7.5559	7.50559	7.76591	7.41459	7.54631	6.98416	7.36448	7.30988	7.87126	6.87375	7.27108	6.23714	6.00795	6.89377	6.58849	6.92221	6.68185	6.68185	6.68185	6.72466	7.37341	7.10886	6.40932	7.17184	6.56458	5.96722	7.38526	7.15847	6.64882	7.02589	6.49647	6.52046	7.77807	6.52463	6.49747	7.56047
IGKV5-2	7.46489e-06	-5.12698	0.000252613	2.05861	0.883146	-0.328437	0.195272	-0.029688	-3.39983	-0.261442	-2.82877	-4.36345	-0.286173	-0.316656	-0.0116025	-0.0751855	-1.23007	-2.0788	-1.99324	-3.14194	-4.36345	-0.401837	0.620805	3.77553	1.37973	-1.41502	-1.05644	-0.667472	-0.300535	-0.637004	-0.637004	-0.637004	-0.583288	-2.00425	0.702517	2.6854	0.718241	1.3795	1.01351	-0.495778	-4.36345	-0.727732	-0.172629	-0.0291685	-0.263951	-0.270011	0.202403	-0.188679	0.614738
SHQ1	7.46718e-06	-5.12684	0.000252613	0.497112	3.33784	2.77546	3.20744	2.11484	2.66142	2.3661	2.53836	2.97301	3.4174	3.04095	2.81901	2.93911	3.29502	3.16243	3.05092	3.27646	2.42482	3.17321	3.46058	3.59049	3.41881	3.83504	3.95094	3.40772	2.51756	3.73472	3.73472	3.73472	2.94485	4.14965	3.52994	3.0123	3.39592	3.31542	3.45509	3.93001	3.1043	2.90214	2.75654	3.56529	3.4024	2.37529	3.78499	3.47244	2.98649
MCM2	7.51253e-06	-5.12421	0.00025322	0.860569	3.34266	2.925	2.46738	3.09105	1.79267	0.829492	2.97877	2.46059	2.82827	2.36595	2.6589	2.6831	2.51458	3.08991	2.66197	2.76085	2.49545	2.69653	3.86028	4.37161	3.56188	3.78223	2.02956	3.4291	3.82	3.41612	3.41612	3.41612	2.85795	5.27725	2.85213	3.86119	2.41611	3.01483	3.52877	2.6402	1.46769	3.3868	3.56513	3.66248	2.94194	2.94968	3.03488	3.15848	2.76837
SLC39A10	7.5156e-06	-5.12404	0.00025322	0.527021	4.7206	4.09697	4.55075	3.46401	3.94244	3.96393	3.32237	4.41285	5.02754	4.06697	4.55453	4.58196	4.54591	4.33474	4.18701	4.49195	4.08361	4.44428	4.61649	4.72382	5.02831	4.87447	5.05045	4.71412	3.98557	5.01173	5.01173	5.01173	4.39847	5.22557	4.82431	4.39752	5.03907	4.79135	4.89561	5.25486	4.48707	3.82157	3.94271	5.02656	4.85915	3.77044	5.08475	5.2137	4.37895
NDUFV1	7.52217e-06	-5.12366	0.00025322	0.469999	4.0778	3.64265	4.16217	3.71988	3.42735	2.87879	3.52078	3.55109	4.34538	3.93089	3.17168	3.80466	3.94739	3.52663	3.66413	3.64809	3.41828	3.97182	4.31354	4.40629	4.26713	4.20332	4.11187	4.13628	3.68201	4.1086	4.1086	4.1086	3.49832	4.68796	4.11851	4.23889	3.77289	3.80095	4.60087	4.07071	3.73497	3.64872	3.65325	4.72939	4.57927	3.26492	4.29349	4.28295	3.61834
SNHG8	7.53773e-06	-5.12276	0.00025322	0.651419	2.64796	1.50381	1.88874	1.45871	1.79267	0.695928	1.75135	2.18676	2.47489	1.84326	2.40728	2.3522	2.65715	2.64544	2.67729	1.99842	1.90808	1.66765	2.60045	2.5963	3.51272	2.53214	3.07128	2.81166	2.1343	3.06542	3.06542	3.06542	2.35388	3.18258	3.24428	2.45285	3.17463	3.02693	2.91055	3.06973	1.73344	1.26812	1.93451	2.58086	2.59298	1.60473	2.84246	2.8855	2.21278
CASP6	7.54798e-06	-5.12217	0.00025322	0.491473	2.02975	1.39613	2.06108	1.72564	1.77331	1.21849	0.919916	1.82285	1.27391	1.34695	0.848498	1.72454	1.83023	1.97695	1.52852	1.82484	1.90808	1.95802	1.5399	2.49447	2.54576	2.58915	1.97772	2.11339	1.76057	2.14821	2.14821	2.14821	1.59949	2.51294	2.41309	2.61197	1.6744	2.24685	1.77163	1.69219	1.42538	1.89811	1.93451	2.20137	1.94331	2.07467	1.84432	1.8163	1.97844
MRPL46	7.54882e-06	-5.12212	0.00025322	0.553376	2.43961	1.94697	2.1655	1.59834	1.49482	1.63817	1.53898	2.0608	2.15611	2.09914	1.55885	2.20822	2.22931	2.26739	2.01182	2.19471	2.03206	2.5588	1.56916	2.29352	2.69745	2.37242	2.79999	2.21536	1.96833	2.60992	2.60992	2.60992	1.8224	3.02789	2.71018	1.92569	2.93214	2.57821	2.45068	2.82272	2.53671	1.75711	1.74698	2.80066	2.55295	0.799226	2.98554	2.90843	2.42681
MRPL3	7.56306e-06	-5.1213	0.000253341	0.55994	3.6589	2.97575	3.54731	2.58672	3.08681	2.84764	2.54976	2.97301	3.73055	2.79779	3.55751	2.91281	3.67005	3.42921	3.47556	3.2374	2.94992	3.68451	3.18628	3.87794	4.23442	3.96134	4.00804	3.57051	2.86801	4.33263	4.33263	4.33263	3.01681	4.37008	3.883	3.5824	3.95565	3.62503	3.45509	4.1989	3.04965	2.88868	3.13877	3.97234	3.55205	2.28187	3.80544	3.6598	3.36944
DTYMK	7.58698e-06	-5.11993	0.000253412	0.531019	2.50454	2.15947	2.21501	1.00273	1.92131	1.84161	1.73147	2.08258	2.446	2.41387	1.6546	2.20822	2.05294	2.4104	2.23519	2.33082	1.45564	2.10382	2.78632	2.55192	2.81271	2.44834	2.86801	2.60173	2.50549	2.64462	2.64462	2.64462	2.07444	3.32228	2.73971	2.34369	2.72999	2.7632	3.22112	2.53948	2.15187	2.33515	2.08468	2.73297	2.7159	1.04647	2.71854	2.76503	2.25541
GEMIN4	7.59297e-06	-5.11959	0.000253412	0.5358	3.59682	2.93786	3.13212	2.56418	3.05511	2.01988	2.93597	2.74627	3.59238	3.28378	3.04784	3.23287	3.24663	3.97508	3.5016	3.22746	2.92454	3.59573	4.19656	3.88243	4.20378	3.7018	3.88681	3.71678	3.44346	3.53649	3.53649	3.53649	3.11376	4.30419	3.98515	3.33106	3.86962	3.67971	4.08404	3.74854	3.26884	3.1251	2.95161	3.68355	3.64066	2.22278	3.7932	3.71287	3.44504
PELI1	7.59703e-06	-5.11936	0.000253412	-0.658689	8.503	8.91812	8.52911	8.93105	9.58096	9.78136	9.06677	9.04906	8.27598	8.39516	8.76786	8.11354	8.80429	8.90075	8.91011	9.30089	9.53245	9.72191	8.43243	7.97594	7.52932	6.52293	8.76128	8.53222	8.76306	8.07429	8.07429	8.07429	8.66221	7.4456	8.10625	8.50009	8.20467	8.21069	7.51791	7.71836	8.73122	8.05654	8.69434	7.14807	8.04124	9.59257	7.88961	7.69334	8.71687
GRAP	7.63917e-06	-5.11695	0.000254461	0.70464	4.02463	3.59474	4.07548	3.21194	2.88524	2.3661	2.59448	3.37703	3.70639	3.24015	2.98783	4.16929	3.90124	3.53446	3.42203	3.63312	2.98716	3.88802	4.25623	4.38115	4.53896	4.03296	4.31698	3.62094	3.48708	3.98203	3.98203	3.98203	3.13239	4.78567	4.63562	3.90026	4.46607	4.46873	4.88362	4.79044	2.82402	2.99298	3.3709	4.34718	4.11626	2.49667	4.50332	4.2414	3.60192
XIAP	7.65876e-06	-5.11584	0.000254546	-0.44268	6.6018	7.53269	6.82117	6.21257	6.62289	7.31777	6.45683	7.17494	6.19002	6.87217	7.66545	6.78946	6.59045	6.34666	7.2337	6.91403	7.23445	7.12623	6.53038	6.52784	5.8817	5.86291	6.59869	6.36265	6.20759	6.30719	6.30719	6.30719	6.76701	6.59181	6.43345	6.07638	6.14563	6.34473	5.73346	6.35478	7.07114	6.31076	6.69776	6.41737	6.37451	6.91339	6.30596	6.21505	6.77649
IGLV3-9	7.66306e-06	-5.1156	0.000254546	2.07271	1.59434	1.31961	0.195272	0.706082	-1.42774	-1.8146	-0.973023	-1.02133	0.334486	-0.0335562	-1.37515	-0.730199	-1.42532	-0.861814	-1.6497	-0.0672424	0.613899	-0.2935	-0.281141	0.641282	3.59232	0.280216	-0.378989	1.07628	1.03733	0.782841	0.782841	0.782841	-0.164108	-0.915339	0.440098	1.89506	3.03232	1.08759	0.158066	0.88769	0.0109122	0.296936	0.333372	0.873068	0.363819	-0.657149	4.86854	0.702481	-0.106352
DOCK9	7.68191e-06	-5.11453	0.000254817	0.598434	5.4397	5.22124	5.25399	4.35978	4.59089	4.1414	4.78459	5.37637	4.97289	4.87254	5.36769	4.56094	5.2976	4.62972	4.96257	5.30684	4.6576	4.68509	5.88165	5.84248	5.26801	5.58033	5.89378	5.18962	5.19169	5.59873	5.59873	5.59873	4.80205	6.48983	5.75842	4.94353	5.50626	5.40823	5.26559	5.90792	5.50086	4.63387	4.3837	5.95606	5.80141	4.12266	6.02824	6.00148	5.34966
B4GALT5	7.71966e-06	-5.1124	0.000255714	-0.816164	8.99654	9.79802	9.24992	9.54484	10.2381	10.2728	9.29475	9.37796	7.61355	9.76302	9.99045	9.67002	8.76546	9.41234	9.53871	9.5157	9.92538	9.51063	9.25802	8.73488	8.14775	7.35596	8.81365	8.89503	9.2239	8.09365	8.09365	8.09365	9.32549	7.9975	8.47917	8.45684	7.75281	8.87246	7.36752	7.77285	8.94211	8.94826	9.648	7.89777	7.72198	10.5216	8.0075	7.82372	9.70089
IL27	7.75817e-06	-5.11024	0.000256633	-0.945086	1.88211	3.25795	1.96788	2.44591	2.00665	3.8894	0.370603	3.0413	-1.03081	1.81974	1.74438	2.95208	2.12609	2.26739	3.19618	2.82812	2.67354	2.72257	1.47955	0.87536	1.65154	1.50918	1.62023	1.66221	0.698691	1.54074	1.54074	1.54074	1.95392	1.59392	2.05428	0.882901	1.48167	1.17719	0.401656	2.33144	2.01595	2.05092	1.59952	1.3354	-0.127599	2.18199	1.22117	0.555255	2.68767
MTATP6P11	7.80124e-06	-5.10784	0.000257103	-0.614244	4.50728	6.03079	4.30619	4.16388	4.90947	5.6713	4.20451	5.11368	3.8892	4.50697	4.89885	4.94527	4.49848	5.11799	5.16893	5.28785	5.06131	5.28343	4.23813	4.42794	3.44287	3.01244	4.20873	3.84428	4.10238	4.28668	4.28668	4.28668	4.64222	4.58557	4.28465	4.08119	4.27481	4.46651	3.34284	4.70996	4.62896	4.27383	4.82423	3.55226	3.39676	5.60241	3.81757	3.78899	4.86296
GALNT2	7.80406e-06	-5.10768	0.000257103	-0.747347	5.99006	6.19106	5.57634	6.79601	5.69862	7.26716	5.7454	5.37637	5.91493	6.65926	8.53662	7.20298	5.26557	5.5102	6.61822	5.62321	5.72212	6.1194	5.90478	5.73122	5.30785	5.41041	5.61858	5.58367	6.21873	5.66362	5.66362	5.66362	5.90199	5.49704	5.54503	5.45348	5.02367	5.72751	5.37666	5.07378	6.75084	5.32544	5.85121	5.63997	5.49967	5.00556	5.28152	5.17008	6.54196
WSB1	7.80473e-06	-5.10764	0.000257103	-0.668079	8.47417	9.6149	8.38063	8.79705	8.52502	10.0491	7.987	8.51433	7.42194	8.74008	9.63787	8.90903	8.73965	8.98333	9.36107	9.11558	8.76004	8.88901	7.82424	8.55582	8.76113	7.25652	8.27416	8.33182	8.56429	8.29121	8.29121	8.29121	8.15028	8.3312	8.05431	7.69605	7.97305	7.95349	6.61208	8.31168	9.21023	8.40738	8.80608	7.77186	7.05567	8.93421	7.85005	7.7819	9.30864
XBP1P1	7.83025e-06	-5.10622	0.000257451	-0.688722	0.936881	2.57607	1.05982	0.435151	1.31913	1.31276	1.84686	1.87368	0.455377	1.58878	0.952631	1.17985	0.783518	1.83201	1.52852	1.28847	0.676037	2.1235	0.675634	0.763063	0.0281053	0.864406	0.977928	-0.667472	0.311906	0.391571	0.391571	0.391571	0.748564	0.179213	0.177802	0.531149	-0.239773	0.835726	-0.135177	0.575201	0.788143	0.522818	0.825752	0.0471307	0.765175	1.85875	0.733156	0.39128	0.740093
H2BC3	7.84129e-06	-5.10561	0.000257451	1.2732	1.71091	0.422519	1.05982	0.332218	-0.730916	0.764255	0.370603	0.763856	-0.610974	0.973401	1.14074	0.588286	-0.414934	0.747634	1.22937	0.61994	1.00135	-1.11477	1.51004	2.76128	2.60666	0.486358	-1.79229	2.26377	2.18059	1.6977	1.6977	1.6977	1.70283	3.36786	1.7789	2.75527	1.80374	2.05926	2.17717	-0.0749174	-0.539683	0.890028	2.43472	1.45225	0.617747	0.286502	1.56613	0.475596	1.27001
HK3	7.85044e-06	-5.10511	0.000257451	-0.828904	7.42662	8.39446	7.41368	8.2735	7.69985	8.63117	6.78449	7.96323	6.32108	7.61004	9.42527	8.99832	6.70681	6.58394	8.31343	7.62356	7.94387	8.1275	7.1509	6.80216	7.00545	6.13496	6.8679	7.01518	7.99632	6.67084	6.67084	6.67084	7.59261	6.4879	6.91541	7.37636	6.3125	6.68545	5.69853	6.40165	8.23026	7.53319	7.93432	6.71248	6.20164	7.59746	6.53079	6.49179	8.25954
UBA2	7.86014e-06	-5.10457	0.000257451	0.449629	4.83398	4.24914	4.94725	3.99725	4.16295	4.30516	3.7604	4.39556	4.86244	4.38005	4.78004	4.33693	4.54924	4.68704	4.68428	4.44557	4.37341	4.50929	5.0465	5.0512	5.2061	5.05934	5.04206	4.78769	4.35535	5.13888	5.13888	5.13888	4.48438	5.64439	5.04339	4.56738	4.74639	4.81248	4.77318	5.06862	4.62896	4.05032	4.60423	5.3207	4.78981	3.79093	5.06283	4.83713	4.58795
SNORD89	7.90652e-06	-5.10201	0.000257451	-0.752032	0.56315	1.89518	1.05982	1.59834	1.65141	1.35768	1.20588	1.14113	0.334486	0.584241	1.18417	0.653279	0.102739	0.381592	0.552609	1.03876	1.00135	1.69421	0.164491	0.198604	0.425856	-0.71747	0.0801588	0.0733741	1.0034	-0.207608	-0.207608	-0.207608	0.699427	0.0731256	-0.376507	0.171054	-0.0790735	-0.672759	-0.999732	0.250493	0.719782	0.65588	0.863185	-0.719225	0.111636	1.33394	-0.258862	-0.324684	0.214878
IGKV2-29	7.90953e-06	-5.10185	0.000257451	3.07684	0.941846	-2.43793	-1.10085	-2.09055	-4.36345	-2.97541	-1.62107	-2.51077	-4.36345	-3.22961	-4.36345	-2.4178	-0.0500672	-0.437546	0.0861709	-3.14194	-4.36345	-1.11477	2.69638	-0.536026	-0.0237012	-2.81761	-1.79229	1.61323	2.82008	-0.911628	-0.911628	-0.911628	2.57431	-1.60149	-0.655222	0.171054	2.1175	0.228958	2.77869	-0.623432	-4.36345	-2.41581	-0.718624	-1.66797	2.14526	1.63527	-1.81233	-0.734244	-2.82368
ANKRD36	7.91314e-06	-5.10165	0.000257451	0.671061	5.30602	4.21785	5.21397	4.25111	4.10607	4.38328	3.90055	4.60938	4.41412	5.49433	4.34567	4.98684	5.35578	4.84648	5.10808	5.09921	4.38275	4.39656	5.27895	5.5723	5.39675	5.05328	5.39313	5.35515	4.70326	5.70119	5.70119	5.70119	4.29477	6.23389	5.22835	4.82668	5.63061	5.05338	5.30057	6.03624	5.66665	4.19402	4.68222	5.56247	5.24246	3.59513	5.86442	6.08101	5.10165
AC068669.1	7.91628e-06	-5.10148	0.000257451	-0.670026	1.51688	2.0453	1.19755	2.39574	2.37087	2.32144	3.10777	0.86782	1.69812	1.79583	1.38364	1.89546	1.51322	1.24418	2.12782	2.23493	1.98374	1.77107	0.239198	1.72238	1.33928	0.437518	1.04662	0.8413	1.54162	1.16393	1.16393	1.16393	1.42911	0.0170053	0.889768	1.48629	1.4022	1.74447	0.309095	1.29323	1.54874	1.75711	2.13145	0.518415	1.02132	1.77895	-0.328455	1.07102	2.06086
JMY	7.91895e-06	-5.10133	0.000257451	0.52908	4.28732	3.44968	4.36586	3.74013	3.74797	3.14537	3.57199	3.86556	4.29362	3.77451	3.91416	4.05968	4.27546	3.98083	3.63306	3.74178	3.44529	4.01985	4.5149	4.38115	4.48437	4.49047	5.06914	4.14922	3.57634	4.43778	4.43778	4.43778	3.93499	4.85733	4.36895	3.82509	4.46607	4.30694	4.35683	4.64219	4.00289	3.63266	3.71597	4.78197	4.5592	2.51321	4.87048	4.65023	4.06427
DNAJA3	7.92324e-06	-5.1011	0.000257451	0.516196	3.88537	3.41332	3.96889	3.19737	3.16314	2.73297	2.77044	3.65646	3.85114	3.90876	2.98783	3.59733	3.62659	3.32473	3.64868	3.66291	3.02346	3.80516	4.34348	4.24842	4.11673	4.2606	4.05047	3.95653	3.79045	4.00891	4.00891	4.00891	3.23078	4.49088	3.92216	3.61565	3.93697	3.94503	3.95253	3.97478	3.24471	3.51496	3.72617	4.26769	3.83677	2.28187	4.33628	4.21405	3.5227
MTHFS	7.9366e-06	-5.10037	0.000257535	-0.665921	3.48078	3.79173	3.09734	3.98882	4.3345	4.99049	4.59128	3.5972	3.49702	3.57822	4.12942	3.12244	3.41665	4.14834	4.53678	3.70647	3.47181	3.99337	3.66409	2.61798	2.71336	1.84503	3.39483	3.27231	4.04098	3.01988	3.01988	3.01988	3.84183	2.37464	2.95642	3.12875	3.29686	2.7776	2.24119	2.98472	3.94418	3.35779	3.74634	2.51522	3.24173	3.66339	2.91201	3.1197	3.90829
ALOX5	7.9851e-06	-5.09772	0.000258756	-0.777945	9.09629	10.2167	9.05865	9.9329	9.71608	10.4561	9.30025	9.72141	8.66638	9.58	10.5949	9.95741	8.6276	8.47085	9.70972	9.28736	9.54876	9.8396	8.66213	8.48972	8.44408	7.11421	8.54867	8.77317	9.69692	8.34363	8.34363	8.34363	9.39139	7.93877	8.74399	9.11649	8.04786	8.82289	7.12607	7.91317	9.6246	9.19424	9.5911	7.84181	8.1987	9.69215	8.22388	8.16263	9.82849
PRDM5	8.00031e-06	-5.09689	0.000258897	-1.04958	4.27767	5.66381	3.91997	3.53526	5.16842	6.38619	3.63756	5.89	3.50404	3.94726	5.46334	5.79009	4.11849	3.68273	3.98649	5.18125	5.58714	4.917	2.69638	3.8644	2.85636	2.17799	4.71276	2.56357	4.456	4.60569	4.60569	4.60569	3.74829	3.79656	3.66433	3.57275	3.57571	3.94821	1.52646	3.31579	5.2783	4.68147	5.26802	1.22476	3.14407	5.10164	2.9927	3.7972	4.34646
B3GNTL1	8.01268e-06	-5.09622	0.000258946	-0.676792	5.26077	6.22817	5.17697	5.05689	5.60594	5.8743	7.25875	5.92507	5.69471	4.68349	6.21414	5.26415	5.80747	4.68704	5.18241	5.16052	5.95768	5.8361	4.44955	5.222	4.46336	3.98278	4.44337	4.83918	5.60483	4.78359	4.78359	4.78359	5.26371	4.67442	4.17003	5.97295	4.71932	5.2234	4.45729	4.27695	6.06134	5.23527	5.25576	4.24964	5.36022	5.46041	4.50332	4.53952	5.665
TRAF5	8.11962e-06	-5.09046	0.000262047	0.665092	4.92913	4.66712	4.9399	3.02657	3.67164	3.52599	3.49152	3.9568	4.92659	4.51798	3.88155	5.31776	4.69761	4.32575	4.58629	4.39322	4.1617	4.44036	5.14451	5.10977	5.25448	4.85833	5.18795	4.89659	4.43069	5.08304	5.08304	5.08304	4.46246	5.6234	5.27111	4.1638	5.55454	5.21945	5.09243	5.87582	4.87275	4.26344	3.89381	5.38274	5.32202	3.65596	5.29605	5.47411	4.57959
CBX5	8.19133e-06	-5.08665	0.000264004	0.548259	6.39079	5.97575	6.12403	5.75621	5.38788	5.01874	5.49423	5.71287	5.91361	6.0424	6.52721	6.13826	6.24119	6.10914	5.98317	6.26405	5.6211	5.66035	6.55252	7.05509	6.36225	6.27533	6.41033	6.25801	6.18128	6.36491	6.36491	6.36491	5.81816	7.69539	6.52038	6.01628	6.39094	6.26842	6.59992	6.33238	5.84372	5.79998	6.32191	6.80293	6.50939	5.33347	6.63043	6.58608	6.02566
REXO4	8.33804e-06	-5.07894	0.00026837	0.501059	2.81217	2.09206	2.762	1.80466	2.37087	1.77693	1.56168	2.49347	2.82827	2.57708	2.2929	2.46511	2.71758	2.77003	2.37322	2.36746	2.31194	2.92674	3.50667	3.02746	3.37947	3.12468	3.26391	2.75634	2.49332	2.92426	2.92426	2.92426	2.46095	3.11735	2.95642	2.92404	2.65198	2.64255	3.13611	3.40846	2.5167	2.65429	2.01986	3.15115	2.89468	1.50904	3.2767	2.90083	2.42681
LILRB2	8.42501e-06	-5.07443	0.000270649	-0.52239	8.30262	8.53356	8.61422	8.89651	8.75035	8.55215	8.75153	8.10361	8.19365	8.37613	9.38556	8.6833	8.51443	8.46779	9.34617	8.52849	8.85543	9.08614	8.33706	8.15372	7.28738	7.63918	8.54032	8.03335	7.98332	8.27417	8.27417	8.27417	8.80206	7.95426	7.75655	8.39234	7.30252	7.50865	7.85595	7.8969	8.44099	8.13593	8.49656	7.99954	8.16029	7.50489	7.7022	7.36274	8.24463
PPP3CC	8.43153e-06	-5.07409	0.000270649	0.594896	4.23203	3.25795	4.15796	3.01	3.0631	3.1833	3.11546	3.74104	4.17099	4.26284	3.6378	4.61088	3.91679	3.58056	3.64868	3.94334	3.23434	3.37548	4.47295	4.52869	4.31223	4.09726	4.42091	4.36798	3.52943	4.58127	4.58127	4.58127	3.33097	4.69245	4.19512	3.73285	4.68894	4.22001	4.45189	4.85772	4.46636	3.48844	3.40936	4.47525	4.41033	2.7687	4.96077	4.69928	3.93038
MIR3613	8.49229e-06	-5.07098	0.000272233	-0.636388	1.13503	2.36383	1.88874	0.786155	1.39706	1.21849	2.24772	1.53774	1.30642	1.61634	1.30713	1.72454	0.737569	0.800535	1.65765	1.46792	1.90808	1.86757	0.504468	0.598291	0.0781158	0.334578	1.07978	0.337377	0.859074	0.391571	0.391571	0.391571	1.65209	0.616951	-0.0060182	0.851343	0.317335	0.889738	0.158066	0.250493	1.69835	0.718075	1.19217	0.873068	1.55475	1.80604	0.343337	0.770818	0.428617
THOC1	8.51765e-06	-5.06968	0.000272679	0.525072	4.08987	3.65827	3.97369	3.18266	3.43353	3.1833	3.13073	3.38581	4.29362	3.54991	3.34434	3.90814	3.9921	3.98654	3.84451	3.72776	3.18176	3.78677	4.14406	4.17717	4.18678	4.30552	4.36148	3.89126	3.48093	4.35899	4.35899	4.35899	3.52677	4.76452	4.12599	3.21806	4.37187	4.06432	4.09448	4.59278	4.2471	3.11358	3.74132	4.28552	4.27847	2.65408	4.49075	4.47952	3.90383
GK	8.54089e-06	-5.0685	0.000272838	-0.861345	8.19763	10.1832	7.46999	7.96921	8.58018	9.86979	8.44693	9.22546	6.93008	8.49064	8.66624	8.43476	8.15595	8.93553	8.81986	8.94234	8.96274	9.59233	7.8442	7.9328	7.08059	5.83607	7.66437	8.06926	7.94166	7.4402	7.4402	7.4402	8.44114	7.28817	7.91323	8.08029	7.51616	7.84979	6.18146	7.43967	8.92252	7.94515	8.56134	6.82206	6.67122	9.35396	7.33501	6.69396	9.05682
MMP8	8.55493e-06	-5.06778	0.000272838	-1.76717	6.66205	5.2627	3.85898	6.32575	3.5855	7.38983	4.26455	5.44521	1.24066	5.67067	11.15	8.6212	3.70629	8.14015	6.95461	7.24648	4.71052	2.60152	4.58102	5.03316	6.98675	2.78732	2.85848	4.0515	7.10981	5.01173	5.01173	5.01173	6.18237	6.65235	7.15388	5.33868	3.40953	4.44412	4.85934	3.28945	6.69741	5.3961	7.76388	5.03361	4.83014	4.71167	4.24041	4.76567	6.71036
FXN	8.55693e-06	-5.06768	0.000272838	0.554256	3.23767	2.15947	2.92954	2.08349	2.59684	2.68089	2.56107	2.70475	3.32523	3.07115	2.54691	2.4831	3.24663	3.16243	2.83579	3.01294	2.23145	2.68334	3.33846	3.42198	3.29211	3.42321	3.27826	3.36398	2.55318	3.35457	3.35457	3.35457	2.70453	3.82544	3.56336	3.03354	3.64063	3.58057	3.89398	3.5184	2.93371	2.46777	2.69559	3.35626	3.63588	1.9096	3.50891	3.40416	2.81661
CLEC1A	8.65899e-06	-5.06253	0.0002755	-0.728013	2.99853	4.27976	3.39095	2.39574	4.01427	4.18568	2.90079	3.6637	1.94521	3.32613	2.77707	3.44963	2.66944	3.60307	4.14908	4.03161	3.50643	3.56728	3.08864	2.73175	2.04011	1.76811	2.99511	2.341	2.81031	2.58334	2.58334	2.58334	3.40179	2.20918	3.31137	2.27399	2.33283	2.5365	1.93541	2.49407	3.38376	3.81447	3.50719	2.35935	2.00395	3.7773	2.43331	1.2251	3.54578
RTKN2	8.66353e-06	-5.06231	0.0002755	1.05861	3.19896	1.72761	2.8377	1.191	2.00665	1.06442	1.98763	2.0387	1.98592	2.15659	2.59597	-0.0751855	3.1	3.71064	2.54998	2.04441	2.23145	3.26466	3.13829	3.12913	2.8635	2.68642	3.94195	2.77872	2.82008	3.05255	3.05255	3.05255	1.70283	4.74953	4.76571	2.08341	4.77296	2.10565	3.84948	4.02886	2.17759	2.81944	2.59905	3.61	2.87857	1.3707	3.45297	2.83053	2.10814
RCN2	8.73356e-06	-5.05881	0.000277112	0.426347	3.27084	2.5428	3.10612	2.85153	2.62949	2.10138	3.00385	2.88901	3.36435	3.04095	3.39142	2.95208	2.95694	2.86001	2.90246	3.15595	2.31194	2.78568	3.11864	3.60142	3.73554	3.41693	3.57423	3.4778	3.02	3.32812	3.32812	3.32812	2.78916	3.77134	3.33091	2.99073	3.58173	3.58875	3.40006	3.71594	3.41652	2.96761	3.09224	3.57821	3.22272	2.79598	3.44777	3.57633	3.24099
H4C9	8.73745e-06	-5.05862	0.000277112	0.844105	3.41329	2.77546	2.80574	3.47613	1.6932	1.21849	2.02078	2.99613	2.11999	2.89103	2.61196	2.85872	1.78577	3.58056	3.25859	2.80159	2.23145	1.89072	3.61584	3.95664	4.62349	3.10917	2.22005	3.73978	3.59355	3.42113	3.42113	3.42113	2.81246	4.79612	3.52994	4.20183	3.94634	3.21321	3.75176	2.88268	2.09903	2.48576	3.80523	3.6503	3.068	3.14271	3.2471	2.46849	2.9262
PGM3	8.81131e-06	-5.05496	0.000278554	0.496828	3.78282	3.74129	3.51473	2.7751	3.01448	2.90929	2.73093	3.37703	3.78347	3.15812	3.57393	3.68542	3.48777	3.36919	3.45794	3.59501	3.19243	3.291	4.10464	4.28953	3.8551	3.63297	3.98196	3.95653	3.50538	3.99553	3.99553	3.99553	3.52677	3.90103	3.67965	3.4144	3.92754	3.7544	3.9487	3.76775	3.5406	3.1703	3.81958	3.73636	3.54697	2.98568	4.15374	3.7172	3.54578
TRAV12-2	8.82179e-06	-5.05444	0.000278554	1.14878	0.346252	-0.755238	-0.809305	-2.81923	-0.263041	-0.404141	-0.848081	-0.690726	-0.610974	-0.424877	-3.1082	-3.08484	-0.0500672	-0.110107	-0.110158	-0.995618	0.17154	-0.401837	1.5399	0.641282	0.640775	-0.24927	0.664869	0.14404	-1.2167	0.652509	0.652509	0.652509	-0.849646	1.01097	1.11678	0.00888911	1.10038	0.495988	0.530233	1.79563	-0.238277	-1.10459	-0.332713	1.28902	0.765175	-2.03644	0.894575	0.39128	-2.09592
TUBB	8.82945e-06	-5.05407	0.000278554	0.511251	7.39526	7.18453	7.14071	6.89752	6.71135	6.51571	6.62389	6.78539	7.50657	6.85202	6.93254	6.46566	6.99741	7.20682	6.81795	7.32602	7.17853	7.08355	8.10457	7.81011	7.16762	7.26003	7.43536	7.36962	7.56611	7.53833	7.53833	7.53833	7.22376	8.88978	7.39566	7.58292	7.09284	7.21935	7.53653	7.03306	6.91939	6.68138	7.38438	7.70112	7.35966	6.91339	7.37729	7.40434	7.04702
THEMIS	8.83779e-06	-5.05366	0.000278554	0.917976	5.41963	4.07967	5.38233	3.13758	3.56313	3.24438	3.61604	5.59663	5.35147	5.61539	4.09	3.74627	4.99966	3.43758	5.31558	4.74961	4.4331	4.49803	5.7821	5.01693	5.5341	5.29863	5.81228	5.26884	4.54124	6.05324	6.05324	6.05324	4.37128	6.69265	6.14245	4.71056	5.85114	5.5813	5.56856	6.05199	5.48808	3.60823	3.90731	5.96346	5.59638	2.57752	6.27476	6.14598	4.7631
BYSL	8.84653e-06	-5.05323	0.000278554	0.621954	1.72177	0.860883	0.594923	1.409	1.47099	1.21849	0.5629	1.09903	1.51552	1.41131	1.42043	0.0264459	1.06973	2.26739	0.955651	0.493033	1.30647	1.49713	1.56916	1.99519	1.6842	2.05387	1.74949	2.00365	1.82026	1.8835	1.8835	1.8835	1.88966	2.69386	1.9902	1.92569	1.58126	1.13308	2.12382	1.82038	0.915854	1.66538	1.59952	1.96615	1.72652	1.21767	1.89099	1.53121	1.37683
H2BC15	8.85299e-06	-5.05291	0.000278554	0.58995	4.46085	3.84047	4.24792	4.44242	3.8895	3.30297	3.44953	3.65646	3.87843	4.13049	4.30198	3.57234	3.66392	4.33025	4.16002	4.00278	4.11199	3.85897	4.90165	4.88229	4.85805	4.02057	3.8246	4.72568	4.84172	4.49357	4.49357	4.49357	3.80165	5.45937	4.62774	5.00397	4.62912	4.61218	5.39648	4.10636	3.41652	4.16081	4.6316	4.22522	4.15019	3.9329	3.98829	4.19863	4.64517
UBIAD1	8.87663e-06	-5.05175	0.00027893	0.508472	3.95438	3.87431	4.01154	3.66799	3.17793	2.51233	2.98718	3.51151	4.10323	3.35096	3.28573	3.43122	3.7358	3.46242	3.56059	3.73479	3.36268	3.70424	4.70481	4.1289	4.33812	4.34909	4.34793	4.06066	3.81022	4.02217	4.02217	4.02217	3.29006	4.48572	4.20926	3.70664	4.03243	3.96088	4.32172	4.3079	3.58931	3.14788	3.51309	4.28749	4.12652	2.87488	4.2464	4.25638	3.44504
IGKV1-5	8.89317e-06	-5.05094	0.000279082	1.99876	5.93875	4.13654	4.7955	5.27378	-0.185259	3.46571	2.83709	2.85146	4.63498	4.36387	6.45148	3.66192	3.21345	2.68818	2.6465	2.23493	2.97485	5.08698	4.94971	7.65487	6.49991	3.58892	1.55098	5.67301	7.93548	6.61779	6.61779	6.61779	3.99731	3.45493	4.96638	5.96836	5.30794	6.78857	5.77514	4.35099	2.57591	5.52999	5.26103	4.78754	4.06382	5.07404	4.64396	4.3119	4.99459
AC124319.1	9.05777e-06	-5.04298	0.000283874	-0.774378	1.62381	2.8178	3.09734	2.715	2.40899	1.44354	1.67012	2.40983	0.942764	1.93369	0.736261	1.63082	1.93574	1.45686	1.80433	2.95393	2.38817	2.57318	1.38401	0.87536	0.768106	1.13333	1.90559	0.560461	1.19596	0.985934	0.985934	0.985934	0.842085	2.02227	0.817757	1.16548	0.196909	0.862985	0.4458	1.32815	1.14167	2.09846	1.93451	1.3201	0.217855	2.26244	1.24533	1.24926	1.56932
MGAM2	9.08671e-06	-5.04159	0.000284407	-1.11199	7.12299	7.26708	7.60727	7.10201	7.35849	8.23004	5.6131	8.7876	5.32395	7.4754	9.54982	9.03193	5.44605	6.9654	8.64788	7.85124	7.30866	8.20198	7.8782	6.37306	6.02325	5.15118	6.80733	5.91196	6.55371	5.66784	5.66784	5.66784	7.81543	4.75597	7.0254	6.40932	5.81962	7.67626	4.95409	5.01872	7.55531	7.84593	7.5402	5.24881	5.50362	8.1716	5.48159	5.64429	7.3327
HYMAI	9.1493e-06	-5.03861	0.000285619	-0.694782	1.90329	3.3474	0.737267	2.26211	1.81176	2.17853	1.80942	2.50963	2.94643	1.53201	3.04784	2.87243	2.22931	2.08751	2.41034	2.27405	2.47811	2.45391	1.2459	1.90986	0.537314	0.788541	1.97772	1.21404	0.968648	1.40565	1.40565	1.40565	2.47562	2.14517	0.177802	1.79908	1.48167	0.387537	0.825814	1.89216	2.47584	1.75711	1.82494	1.05037	2.18509	2.75486	0.799906	1.12423	1.45205
CDKN2D	9.14938e-06	-5.03861	0.000285619	-0.654892	5.91165	6.55253	6.12187	7.11273	6.35811	6.98526	6.29098	6.74671	5.63996	6.13584	6.43808	6.08478	5.91072	5.44524	6.39909	6.59765	6.63611	5.88014	5.82366	5.1807	4.82731	4.38172	6.01873	5.89797	6.82418	5.22595	5.22595	5.22595	6.20675	4.78776	5.65631	6.55846	5.99125	5.67944	5.41741	5.23659	6.19009	5.92885	6.18819	5.1123	5.18306	7.14987	5.17238	5.10208	6.52246
FAM126B	9.30209e-06	-5.03142	0.000290006	-0.805497	8.84795	8.92883	8.58882	9.24378	9.68316	10.589	9.84572	9.54286	8.27572	9.60225	9.93889	9.18316	8.8228	8.43418	9.66109	9.65976	9.21967	9.12143	8.67354	8.29229	7.92461	6.60263	8.52649	8.927	8.84468	8.03027	8.03027	8.03027	9.17072	7.56079	8.31743	8.45667	8.4116	8.87936	6.83644	7.75652	9.71614	8.87358	9.37812	7.17302	8.11118	9.84693	7.90082	7.78887	9.34353
SATB1-AS1	9.36552e-06	-5.02847	0.000291603	0.800153	3.89323	3.67372	3.39812	2.34376	2.66142	2.68089	2.63785	3.74104	3.31727	3.14871	3.1167	1.42289	3.95744	3.8861	3.65643	3.28606	2.49545	3.26466	4.16337	4.11371	4.10472	4.27457	4.55369	3.68158	3.48093	4.00891	4.00891	4.00891	3.54079	4.60711	4.54095	2.85411	4.09274	4.09626	4.53086	4.03416	3.31591	2.96761	3.19123	3.6411	4.02411	1.80604	4.48569	4.4897	3.80686
TCTEX1D4	9.46362e-06	-5.02394	0.000294273	-1.15668	-0.408425	-1.98546	-0.809305	1.06825	0.372892	0.199779	2.28912	-1.72575	1.33821	-0.808887	-1.37515	0.0264459	-0.639052	0.0730509	-0.219345	0.0273895	-0.0122418	-0.0101368	-0.634326	-0.981364	-0.954155	1.03826	-1.05644	-0.551248	-1.2167	-1.12886	-1.12886	-1.12886	-0.358527	-3.49463	-1.64735	0.171054	-0.0790735	-0.83851	-0.422033	-2.12819	-1.79419	0.994239	-1.60766	-1.79543	-0.263951	-0.16105	-2.97372	-0.937333	-0.965996
RPSA	9.48649e-06	-5.02289	0.0002946	0.614659	6.39985	5.56368	6.26292	5.37111	5.04273	5.07362	5.54353	6.29389	6.52476	5.60339	5.96925	5.82753	5.67509	5.97462	6.3805	5.91384	6.22131	5.53188	6.05322	6.63076	7.06285	6.44245	6.18699	6.33271	6.074	6.78655	6.78655	6.78655	6.03791	7.22958	6.59026	7.05566	6.57509	6.3687	6.44338	6.43608	5.91615	4.77588	6.06107	7.0463	6.99488	5.0796	6.33368	6.39294	5.89133
MANEA	9.52339e-06	-5.02121	0.000295361	0.796833	4.42858	2.97575	4.3912	3.75015	3.34454	3.90461	2.61633	4.02585	4.20156	3.01011	4.15147	3.12244	4.14513	3.71753	3.94913	3.618	3.96417	3.98801	4.52986	5.45521	4.62138	3.81128	3.99071	4.46087	3.82486	4.69117	4.69117	4.69117	4.21398	4.529	4.21978	4.41921	4.3079	5.04	4.89759	4.75558	3.62713	3.56658	4.63701	4.55418	3.88594	3.14271	4.45754	4.00298	4.26536
AL133517.1	9.56003e-06	-5.01954	0.000295788	-0.914794	1.56423	3.1516	1.26178	1.76569	2.26401	3.05279	2.24772	2.49347	-0.104251	2.3331	2.42549	1.63082	1.33954	2.46057	2.37322	1.9018	2.18946	2.78568	1.17154	1.38567	1.09398	0.10364	1.26416	1.30937	1.2834	0.391571	0.391571	0.391571	1.5449	0.53939	0.532977	0.944018	1.03162	1.48853	-0.071566	0.575201	1.62548	2.00176	1.82494	0.518415	0.316786	2.99748	0.832157	0.737054	2.26934
MORC2	9.56989e-06	-5.01909	0.000295788	0.511446	4.53232	4.12535	4.62893	3.77979	3.72297	3.10642	3.87812	4.23472	4.49743	4.00576	3.95234	3.68542	4.56248	4.30759	4.18701	4.43698	3.86095	4.46756	4.92729	4.85058	4.64853	4.98906	5.04626	4.41517	4.19172	4.70151	4.70151	4.70151	4.086	5.48674	4.66926	4.39479	4.30426	4.25129	4.39673	4.74915	4.02431	4.08023	3.98153	5.15387	4.82595	3.26492	4.81104	4.79057	4.06027
RNU7-41P	9.57437e-06	-5.01889	0.000295788	-0.742914	2.15474	3.32799	2.23114	1.91563	2.2218	3.06638	2.82775	2.57253	1.39977	2.74882	3.18243	2.99032	2.34108	1.72661	3.05092	3.15595	2.77641	2.76076	1.857	1.99519	0.705845	1.00512	2.09589	1.92556	2.02015	1.59498	1.59498	1.59498	2.25532	2.00795	1.3894	0.973633	1.22878	1.32173	0.158066	1.58075	2.59512	2.70124	2.57668	1.03171	1.38274	3.65596	0.983413	1.17555	1.87289
HEATR1	9.62109e-06	-5.01678	0.000296847	0.502245	5.45462	5.14012	5.33832	4.53803	4.63712	4.33916	4.40612	5.03211	5.22326	5.21442	5.16041	5.09607	5.51407	5.06762	5.23509	5.29737	4.8074	5.20249	5.80687	5.90114	5.36814	5.57893	5.69413	5.29819	5.11432	5.54579	5.54579	5.54579	4.82514	6.47298	5.5183	4.90945	5.56522	5.42547	5.30057	5.87434	5.45692	4.80483	5.11932	5.99871	5.66488	4.08444	5.8259	5.86453	4.9585
MLLT1	9.64967e-06	-5.01549	0.000297345	-0.725652	6.40605	7.71225	6.03724	7.6374	6.89154	7.78726	6.84068	6.27747	5.66993	7.08752	7.88162	7.09892	6.29868	5.62281	6.87468	6.25063	6.48809	7.40876	6.7618	5.95111	5.71884	5.09914	5.97643	6.69162	6.93858	5.54464	5.54464	5.54464	6.49108	5.47377	6.17794	6.13161	5.29517	5.92796	5.41741	5.2885	7.04081	6.29809	6.43266	5.72517	5.87123	6.75555	5.68511	5.81482	7.23491
MSH2-OT1	9.67983e-06	-5.01413	0.000297881	0.882539	-0.138894	-1.98546	-0.566887	-0.719728	-1.83965	-1.46255	-0.113711	-0.421936	-0.737812	-1.56186	-0.766917	-1.10699	-0.639052	-0.565588	-1.13997	-1.1949	-1.37574	-0.941227	0.00236146	-0.856496	0.0781158	0.749058	0.42792	-0.162117	-1.57843	0.263465	0.263465	0.263465	-1.00387	-0.915339	0.0578933	-0.627982	0.373977	0.0507696	1.12631	-0.0749174	-0.238277	0.12395	0.279011	0.518415	-0.194165	-0.988481	0.15219	-0.324684	0.325702
SPG11	9.69207e-06	-5.01358	0.000297881	-0.435274	8.31997	8.73275	8.8085	8.54709	8.9241	8.51142	8.44921	8.71236	8.00042	8.81039	9.10149	8.9198	8.56278	7.74831	8.57489	8.98073	8.49506	8.96476	8.21251	8.13598	7.64919	7.3617	8.55771	8.01814	8.04065	8.08952	8.08952	8.08952	8.03649	8.19557	7.61965	7.5916	7.67499	7.91046	7.1517	8.19561	8.51629	8.27529	8.52056	8.15215	7.97604	9.03141	8.15423	8.16501	8.3665
H4C1	9.71095e-06	-5.01274	0.000298077	1.07726	1.34076	-0.101032	0.380244	0.706082	-0.432442	0.295241	0.370603	0.763856	0.813022	0.341579	0.172184	-0.302831	-0.0500672	0.800535	0.904521	0.944893	0.17154	-0.401837	1.3507	2.23859	2.00176	0.334578	0.527416	1.86409	1.44381	0.902369	0.902369	0.902369	1.16525	3.42289	0.854212	2.16269	1.31809	1.34124	1.52646	0.321545	-0.539683	0.0290014	1.78649	1.62401	1.13414	0.432747	1.79608	0.475596	0.214878
EPRS1	9.78082e-06	-5.00962	0.000299836	0.505677	5.17299	4.77852	4.99998	4.63311	4.63444	3.76151	4.08423	4.41714	5.27756	5.01138	5.33434	4.53961	4.9899	4.73539	4.60643	4.90413	4.58253	5.04374	5.68354	5.86419	5.0875	5.26403	5.29065	5.20002	4.79537	5.3716	5.3716	5.3716	5.00525	6.04774	4.80814	4.82871	4.80936	4.94115	4.82005	5.09167	4.64287	4.45824	5.1556	5.55105	5.18633	4.06775	5.54741	5.32157	4.74077
DDX10	9.81081e-06	-5.0083	0.000300369	0.537218	3.75953	2.91203	3.56651	2.75535	2.79216	2.96841	2.67996	3.20905	3.67561	3.63323	3.05955	3.2222	3.8643	3.66144	3.56059	3.67026	2.97485	3.60276	3.96854	3.90906	3.64719	3.80648	4.10383	3.93676	3.17284	4.03531	4.03531	4.03531	3.39409	4.4142	3.83364	3.12215	4.01918	3.97657	3.93327	4.39284	3.62713	3.44312	3.05228	3.96252	3.55712	2.30105	4.35583	4.12548	3.2828
CLEC4D	9.84223e-06	-5.00691	0.000300728	-1.06059	5.40074	5.60053	5.09119	6.25188	6.26332	7.57599	5.30707	6.33416	3.89455	5.24785	7.68684	6.65112	4.19274	4.92898	6.66217	5.68076	5.47145	5.78141	4.54466	4.83215	5.66361	3.4419	4.62843	4.62118	5.65624	4.87594	4.87594	4.87594	4.75172	4.81682	4.69712	4.57464	3.64063	4.72976	2.24119	4.4335	6.23517	4.77222	5.87546	4.03925	2.55295	6.24992	3.86511	4.49223	5.77408
ST20-AS1	9.84773e-06	-5.00666	0.000300728	-0.629874	3.20198	2.93786	2.6821	4.13359	3.78226	4.76311	4.17904	3.48723	3.52491	3.55704	3.69146	2.60311	3.30293	3.84262	4.12694	3.22746	3.08201	3.79293	3.47611	2.47083	3.31836	1.95322	2.8962	3.24846	3.84416	3.06542	3.06542	3.06542	3.54774	1.90348	3.35655	3.41979	3.27471	3.08596	2.38417	1.98262	2.93371	3.50617	2.87122	1.99534	3.08915	3.43077	2.41213	2.66084	3.43889
URI1	9.88069e-06	-5.00521	0.000301348	0.561293	4.72777	4.12535	4.67389	3.28266	3.91622	3.97117	3.44343	4.17517	4.67909	4.35163	3.88155	4.16372	4.7564	4.38757	4.53258	4.78051	4.12318	4.32614	5.02818	4.99845	4.84005	4.85135	5.14747	4.62736	4.04516	4.89047	4.89047	4.89047	4.04725	5.44482	4.88062	4.18294	5.07155	4.8002	4.7292	5.46952	4.77085	3.75637	4.11164	5.2182	4.95634	3.30346	5.31756	5.20292	4.44182
C3orf86	9.9102e-06	-5.00392	0.000301641	-1.03983	5.72514	6.91226	5.02795	6.2216	6.80068	7.91532	6.56963	6.09269	4.51493	6.43767	7.04871	6.42552	5.40622	6.16316	6.63204	6.08587	6.24968	7.10968	5.83273	5.00051	4.56111	2.82578	5.17266	5.28065	6.77411	4.56777	4.56777	4.56777	6.40941	3.94305	5.53804	5.22015	4.5078	5.78653	3.00946	4.39284	6.18217	6.17044	5.92719	3.12057	4.03505	6.24497	4.39414	4.57578	6.82092
DIPK1A	9.91557e-06	-5.00368	0.000301641	0.680556	3.44795	2.52587	3.50149	2.88828	2.92962	2.6084	1.91896	2.18676	3.51103	3.26649	2.89938	3.53833	3.08172	2.3227	2.79426	2.6161	2.168	2.70961	3.61584	4.31962	3.68399	3.24309	3.3816	3.6455	2.93255	3.71445	3.71445	3.71445	2.62782	4.16264	3.47833	2.96884	3.79898	4.1077	3.66572	3.6622	2.49641	2.91547	3.28386	3.98694	2.9106	2.42857	3.8256	3.37701	3.19794
TOMM22	9.93391e-06	-5.00288	0.000301814	0.464819	4.3437	3.5866	3.99274	3.59205	3.55749	3.91967	3.43116	3.54326	4.67598	3.99529	4.04948	3.654	3.92193	4.50777	4.13805	4.08209	4.05467	3.92773	4.26966	4.58207	4.51193	4.11678	4.42414	4.20813	4.07813	4.8163	4.8163	4.8163	4.32748	4.98532	4.61982	4.61279	4.4919	4.37005	4.9579	4.38456	3.79435	3.42459	4.41239	4.60555	4.62584	3.14271	4.21617	4.09915	4.08412
MTHFD1	9.96026e-06	-5.00173	0.000302199	0.571385	4.30972	4.14211	4.11948	3.84667	3.59103	2.90929	3.41255	4.00889	4.09394	4.01614	3.54923	3.45875	3.93217	4.33025	3.81019	3.88767	3.65267	4.15027	4.57021	5.20598	4.54786	5.03902	4.22734	4.29609	4.11832	4.31927	4.31927	4.31927	3.73006	5.89557	4.04945	4.29568	4.15062	3.98279	4.08404	4.24532	3.40568	3.93721	4.17628	4.975	4.21255	3.56372	4.3079	4.39544	3.81638
SRSF6	9.97194e-06	-5.00122	0.000302199	0.384999	5.82075	5.54279	5.69595	4.91272	5.15726	5.30339	5.07232	5.43043	6.18893	5.56146	5.8258	5.66369	5.56921	5.23552	5.41255	5.57507	5.43822	5.90451	5.67347	6.02602	6.17027	5.63008	5.98083	5.81106	5.51286	6.0181	6.0181	6.0181	5.74135	5.99697	5.85602	5.73323	5.62333	5.58028	5.76973	5.8171	5.63915	4.89845	5.73739	6.0059	6.12607	5.08237	5.85758	5.83191	5.83741
GTPBP4	1.00091e-05	-4.99961	0.000302438	0.441137	3.962	3.70414	3.90998	3.55825	3.40237	3.31441	2.87383	3.48723	3.84008	3.65997	3.43701	3.44963	3.69431	3.94603	3.90429	3.56377	3.45419	3.92773	4.37281	4.27596	4.2122	4.35567	4.30651	3.89126	3.64398	4.1363	4.1363	4.1363	3.38635	4.64463	4.06508	3.30799	3.64639	3.83232	3.84124	4.4375	3.83531	4.04426	3.51309	4.3789	3.88594	3.08857	4.30503	3.99229	3.43271
LEF1	1.00093e-05	-4.9996	0.000302438	0.941666	6.64793	6.39712	6.05321	5.43461	5.60183	3.71047	5.15675	6.44756	5.3899	4.67696	6.16621	5.83105	6.65445	5.59125	6.34018	6.34322	5.33126	6.49192	6.9824	7.04662	7.09774	7.2857	7.5182	5.84062	6.34094	6.65763	6.65763	6.65763	5.79203	7.83024	7.49532	6.08658	5.76904	6.81192	6.98408	6.78461	5.88332	5.17002	5.70425	6.83658	6.84237	4.59223	7.16144	7.09264	6.23538
METAP1	1.00179e-05	-4.99923	0.000302438	0.436075	4.67405	4.13096	4.54753	3.58087	4.09832	4.06896	3.87812	4.10244	5.00543	4.4621	4.29209	4.20766	4.63006	4.36579	4.4142	4.48362	4.19921	4.29177	4.99892	4.79217	4.54564	4.48447	4.95539	4.62118	4.18038	5.03644	5.03644	5.03644	4.53777	5.49704	4.79882	4.3475	4.5908	4.56317	4.75356	4.82141	4.49731	4.26865	4.44361	4.84878	5.03835	3.74266	4.91068	4.75938	4.35629
RBMS1	1.00807e-05	-4.99651	0.000303714	-0.573232	7.99412	8.8824	7.69239	8.07262	8.39039	9.45462	7.88606	8.45454	7.50482	8.19916	9.1852	8.46308	7.7841	8.12468	8.68622	8.42066	8.12429	8.86547	7.80554	7.62807	7.32929	6.91677	7.79459	7.66336	8.24731	7.7838	7.7838	7.7838	8.14283	7.62351	7.79895	7.53964	7.45388	7.76947	6.79811	7.45407	8.42061	7.91643	8.2221	7.27793	7.32517	8.83411	7.47435	7.4077	8.54157
MGMT	1.00856e-05	-4.9963	0.000303714	0.625511	3.16036	2.50873	3.14069	2.58672	2.30501	1.56344	1.90127	2.40983	3.36435	2.84516	2.03272	2.81677	3.37973	2.42732	2.4643	2.77456	2.38817	2.32388	3.59466	3.29311	3.29211	3.32593	2.92386	3.41489	2.80046	3.32278	3.32278	3.32278	2.58788	3.4759	3.09995	3.12875	3.28213	3.42465	4.20135	3.75497	3.13086	2.55555	2.19154	3.36	3.61172	1.72318	3.93359	3.49281	2.93497
CAMTA1	1.01049e-05	-4.99547	0.000303911	0.438146	3.58545	3.33773	3.37652	2.715	2.90316	2.71582	2.97031	2.74627	3.76019	3.24015	2.97552	2.99032	3.36469	3.57298	3.09719	3.45731	3.6983	2.98168	3.65047	3.24515	3.67182	3.93959	3.4014	3.66365	3.31794	3.58643	3.58643	3.58643	3.71159	3.86969	4.01766	3.5824	4.01918	3.59283	3.97906	3.68932	3.30428	3.6646	3.45298	3.60369	4.08151	2.84906	3.66925	3.49786	3.52851
DISC1	1.01435e-05	-4.99381	0.000304463	-0.701045	6.59163	7.76731	6.71906	7.01434	6.91712	7.62447	6.95709	7.65079	6.02035	6.85708	7.15144	7.10981	6.69709	6.42034	7.08519	7.2775	7.52879	7.56892	6.70362	6.21396	5.63465	5.40407	6.47017	6.60502	6.28554	6.17693	6.17693	6.17693	6.40845	6.21765	6.2187	5.87729	6.03801	6.4524	4.87759	5.82934	6.97268	6.79033	7.29433	5.68916	4.85504	7.7329	5.72645	5.668	7.3764
COL19A1	1.01488e-05	-4.99359	0.000304463	1.16666	2.91471	2.74652	3.02516	2.14552	0.734863	1.63817	1.11671	0.86782	2.80571	1.24467	2.2929	2.25084	1.24418	1.72661	2.53325	-0.820548	0.548964	3.25577	1.88053	3.37817	3.70403	2.22192	2.92386	2.93636	2.84903	1.89795	1.89795	1.89795	3.14162	-0.165778	3.78254	1.28841	4.66076	3.05083	2.97222	4.53789	-0.717846	2.71656	2.19154	2.81709	3.4951	1.75133	2.90444	3.87688	1.89103
SYCP2	1.01727e-05	-4.99257	0.000304772	-0.921825	3.71337	4.27976	3.02516	3.75015	3.40237	4.95804	2.8089	3.76816	2.50321	3.33445	6.3633	5.94251	2.75265	2.58641	4.91169	3.52375	4.13429	3.39988	3.70421	3.2659	2.98645	3.33262	2.8489	2.94628	3.2253	2.88852	2.88852	2.88852	4.22704	2.24627	3.3692	2.72075	3.08416	3.6448	2.22861	2.33144	4.69721	3.82863	3.51309	3.0666	2.9106	4.12804	2.70989	2.94586	4.34974
KIAA1109	1.01846e-05	-4.99205	0.000304772	-0.513778	8.92584	9.40423	9.38448	8.62333	9.63372	9.68082	8.69441	9.71173	8.4932	8.8443	9.7289	9.02657	9.41918	8.96588	8.89177	9.82243	9.73029	9.59893	8.93605	8.7895	8.03179	7.65829	9.27974	8.17429	8.78616	8.8376	8.8376	8.8376	8.46592	9.00042	8.31804	8.12901	8.70928	8.36821	7.65995	8.98096	9.13553	8.82384	9.23096	8.49886	8.36253	9.85588	8.74462	8.7408	9.01648
COLGALT1	1.02131e-05	-4.99084	0.000305241	-0.593401	6.6775	6.85325	6.63289	7.08431	6.49214	7.52459	6.40991	5.99848	6.95272	6.45971	8.87817	8.18396	6.64903	6.4108	6.96635	6.57335	6.39069	6.9508	6.57613	6.26639	6.14483	6.15776	6.76845	6.52702	6.80461	6.5031	6.5031	6.5031	6.94422	6.29343	6.1498	6.36949	5.74776	5.75505	6.42764	6.00824	6.8561	6.56246	6.74428	6.70624	6.56956	5.48577	6.17299	5.96548	7.0651
CD8B	1.02625e-05	-4.98875	0.000306334	1.09112	3.5832	0.347419	3.723	0.786155	1.44676	1.99166	1.49248	2.64748	4.42896	3.69271	1.38364	1.72454	2.07158	2.06607	3.24837	2.04441	2.65823	2.98168	3.49147	3.27275	4.08038	3.22881	3.84884	3.63327	2.57645	4.28943	4.28943	4.28943	2.84671	4.80858	4.35312	3.05448	3.31143	3.10891	3.45509	4.15093	3.83531	2.46777	1.43525	4.28158	4.15354	0.903261	3.75165	4.77194	2.79751
NCAPG2	1.02849e-05	-4.9878	0.000306618	0.846676	3.66256	2.68684	2.88944	2.73531	2.42147	2.58969	2.56107	2.58783	3.14823	2.74882	2.81901	3.11091	2.96694	3.62524	3.46678	3.53184	2.54624	2.28946	3.81825	3.99443	3.97213	3.85842	2.58589	3.45017	3.51143	3.4311	3.4311	3.4311	2.96578	5.06705	3.93498	3.55817	3.60558	3.38759	3.70712	2.97373	3.02153	3.93721	3.31796	3.71605	3.56217	2.56171	3.47356	3.03887	2.94369
LINC02288	1.03118e-05	-4.98666	0.000306978	-1.00175	2.1463	1.97219	2.49436	2.97625	3.26364	4.06219	3.6106	3.20905	1.09939	3.61285	2.27292	2.6831	1.78577	1.6129	1.88568	3.41418	2.168	3.59573	1.5399	1.45959	1.70026	0.708464	1.37517	2.32588	1.71936	0.719146	0.719146	0.719146	0.929912	0.53939	1.92315	-0.049486	1.31809	2.99648	0.7574	1.18307	2.22768	2.84753	2.862	0.0838186	0.111636	3.66339	1.26908	1.15012	2.02845
RRN3	1.03227e-05	-4.98621	0.000306978	0.504766	3.94238	3.18434	3.72869	2.54129	3.31808	3.47594	3.04471	3.58199	4.00761	3.61285	3.30553	3.45875	3.80427	3.8363	3.58515	3.83631	3.42734	3.81729	4.05897	4.07111	4.06186	4.12065	4.27465	3.97603	3.35204	4.28118	4.28118	4.28118	3.23078	4.68571	3.90053	3.56791	3.68047	3.75075	3.86988	4.35946	3.61777	3.43389	3.45911	4.35658	4.03505	2.41102	4.42883	4.31477	3.5227
SH2D1A	1.03826e-05	-4.9837	0.000308214	0.915622	3.13147	1.15319	3.2317	0.862017	1.17909	1.84161	1.34324	2.57253	3.18366	2.34962	2.42549	1.34634	3.14469	2.34067	2.23519	2.81492	2.67354	1.46664	3.29534	2.78064	3.1706	2.96152	3.55077	3.57691	1.82026	4.02217	4.02217	4.02217	2.36967	4.67895	2.72009	2.66739	3.84479	3.17566	3.38313	4.18943	3.71755	1.84335	1.55446	3.45408	3.47917	1.33394	3.53363	3.98871	2.16886
TRAV8-3	1.03901e-05	-4.98338	0.000308214	1.17543	-0.049299	-1.36402	-0.947725	-1.60869	-1.83965	-2.28127	-0.347488	-0.421936	-1.39889	-0.424877	-1.37515	-2.4178	-0.0500672	-0.706112	-2.44502	-1.1949	-1.37574	-1.54073	0.675634	-0.122448	0.262438	-0.511636	0.375474	-0.343602	-1.38626	-0.0329289	-0.0329289	-0.0329289	-0.258045	1.03942	0.440098	-0.541658	-0.327376	-0.0989852	0.158066	1.36225	0.408454	-1.96124	-0.833708	0.347906	-0.00302801	-3.13743	0.954404	0.803809	-0.340202
AP000640.1	1.04841e-05	-4.97947	0.000310617	-0.633409	3.66501	3.95241	3.76238	3.79922	4.49668	4.76311	5.07824	4.03146	3.13923	3.88062	4.33125	3.61375	3.89602	3.91638	3.96793	4.41089	3.97657	4.39251	3.05802	3.51737	3.00596	1.74822	3.4274	3.55114	4.07405	3.36501	3.36501	3.36501	3.49832	2.70278	3.40035	3.39811	3.84979	3.96088	2.80435	3.18853	4.05931	3.73397	3.97727	1.98567	2.72493	4.44055	2.86602	2.81443	4.06427
IGKV6D-21	1.05174e-05	-4.97809	0.000311216	2.30996	-0.195519	-2.43793	-1.46663	-2.81923	-1.83965	-4.36345	-4.36345	-4.36345	-3.26968	-1.33373	-0.942624	-3.08484	-0.522645	-2.52283	-2.44502	-2.49011	-2.44779	-1.81256	1.2459	-0.741579	-1.05836	-0.957637	-4.36345	1.39879	-1.06499	-1.88094	-1.88094	-1.88094	0.160301	-2.95619	-1.00099	-1.03658	-0.627484	-0.0473203	0.721937	-1.51931	-1.79419	-1.6161	1.38466	-0.151762	-1.25135	-3.13743	-0.401577	-2.58221	-3.39721
ERI3	1.05662e-05	-4.97608	0.000312273	0.480548	3.69258	3.18434	3.77344	2.47035	2.82072	2.81579	2.79938	2.78662	4.06098	3.54274	2.68936	3.58904	3.59473	3.54999	3.3945	3.48258	3.03536	3.63738	3.79368	3.61765	4.0209	3.72742	3.83434	3.90659	3.39848	3.8765	3.8765	3.8765	3.18689	4.2259	3.9519	3.44644	3.52658	3.57233	4.03069	3.99666	3.59886	3.11358	3.36438	3.98694	3.95668	2.78241	3.91489	4.05186	2.97803
MAP4K1	1.05793e-05	-4.97554	0.000312273	0.617614	5.43439	4.88525	5.68135	5.06494	3.88049	3.67542	4.45847	5.15022	5.47816	5.27621	4.36467	5.01494	5.26557	4.61503	4.64977	5.10464	4.76157	4.56071	6.32168	5.86985	5.49206	5.34902	5.48107	5.68787	5.17844	5.66044	5.66044	5.66044	4.67118	6.38079	5.24217	5.29829	5.34561	5.56168	5.65689	5.7251	5.33653	4.89172	4.70044	6.18543	5.9388	3.8178	5.86442	5.98719	4.85143
PI16	1.06409e-05	-4.97302	0.000313703	1.03001	1.51387	1.01443	0.436982	-0.029688	1.26473	-0.404141	0.318238	0.326472	0.813022	0.406177	-0.0116025	-1.96341	1.27667	1.55249	0.679692	0.425131	1.04909	0.662897	2.11681	0.683028	1.5665	1.95322	0.0801588	1.11197	2.46866	2.00866	2.00866	2.00866	0.298705	2.30604	2.61779	2.09693	2.34705	0.628966	1.6822	1.66512	0.648019	1.46233	0.532386	2.55496	1.65269	-0.0597428	1.74617	0.803809	0.325702
AC010210.1	1.07166e-05	-4.96994	0.000315543	-0.789605	5.33361	6.00353	5.41447	5.74373	6.61612	6.30824	6.78268	6.24887	5.05888	5.25883	5.69866	5.77192	5.90423	5.35969	4.97191	6.08036	6.06026	7.28153	4.00111	4.76327	4.67315	3.89506	5.33595	3.96631	5.33841	5.36251	5.36251	5.36251	4.98745	5.16391	4.48102	4.64305	4.93468	5.0265	3.30739	4.6177	5.56802	5.06026	5.82892	4.76372	4.00198	6.94725	4.50832	4.69489	5.71676
TESPA1	1.07339e-05	-4.96924	0.000315663	0.793348	5.59055	5.24987	5.50847	4.12592	4.60464	3.77813	3.9573	5.12421	5.0324	4.49959	4.64668	4.40456	5.86069	4.93786	4.86899	5.47997	5.04669	4.77803	5.85517	5.55132	5.99261	5.88925	6.17649	5.36443	5.04928	5.97188	5.97188	5.97188	4.60602	6.80359	6.43646	4.88043	5.67214	5.62774	6.06599	6.12581	5.23304	4.55938	4.30767	6.05407	5.75033	3.8765	6.31526	5.9323	4.94554
NT5DC1	1.07733e-05	-4.96765	0.000316208	0.450582	3.88627	3.26817	3.7	3.04296	3.18527	2.76667	3.34872	3.62713	4.48684	3.27516	3.70644	4.10685	3.75323	3.14208	3.07424	3.10261	3.52343	3.51609	3.86619	3.8644	3.93869	3.90856	4.03787	3.77917	3.29006	3.97182	3.97182	3.97182	3.86986	4.26858	4.0015	3.43584	4.0629	4.0196	4.18842	4.29912	3.98115	3.41524	3.76624	4.10766	4.1964	3.17425	4.01663	4.18617	3.65063
NEMP2	1.07835e-05	-4.96724	0.000316208	0.591346	3.43504	3.08381	3.36194	1.64203	3.039	2.40941	2.468	3.13805	2.95671	2.71096	2.77707	3.35512	3.17948	3.26951	3.34742	2.74701	2.6113	2.54427	3.0683	3.51737	3.28681	3.64377	3.50268	3.58329	3.30407	3.13419	3.13419	3.13419	3.30656	4.46752	3.89179	3.1931	3.79898	3.16475	3.6231	3.35018	2.97829	3.27745	2.91643	3.59736	3.73759	1.93437	3.9847	3.72153	3.19794
SPPL2A	1.07922e-05	-4.96689	0.000316208	-0.411978	6.57495	7.15799	6.65772	6.82592	6.5734	7.05596	6.36625	7.06235	6.00805	6.60611	7.60031	7.05224	6.85269	6.63944	7.14837	6.92175	7.03476	6.69296	6.17121	6.60385	6.1753	5.92291	6.66915	6.44017	6.50377	6.46478	6.46478	6.46478	6.39405	6.6535	6.22219	6.13816	6.3305	6.23229	5.55728	6.54679	6.82593	6.41183	6.78019	6.51085	6.19027	7.07457	6.29443	6.16435	6.65439
RPUSD2	1.08058e-05	-4.96634	0.000316218	0.533005	1.67519	1.1084	1.90893	1.55328	1.14938	0.695928	0.772023	1.14113	1.39977	1.05625	0.736261	1.2655	0.953944	1.55249	1.09899	1.68668	0.792818	1.37111	2.33689	1.81916	2.22905	1.7076	2.29256	2.32588	1.44381	1.79359	1.79359	1.79359	0.796082	2.13202	1.6186	1.67838	1.31809	1.63804	2.02543	1.8447	1.42538	1.18248	0.825752	2.01447	1.57488	1.25748	1.95097	1.84828	1.65672
TMEM97	1.08352e-05	-4.96516	0.000316619	0.757789	1.54631	1.19663	0.12794	1.59834	0.5652	-0.740452	0.207438	0.0889865	1.54306	0.691805	0.481617	0.940459	1.54024	1.80637	0.61755	1.12689	0.334534	0.815852	1.47955	2.34644	2.18408	1.80708	0.790357	1.90536	1.46889	1.59498	1.59498	1.59498	1.16525	2.71165	1.87073	2.17549	1.4022	1.66925	2.27829	1.1444	0.492807	1.30911	1.84379	0.993655	1.26378	0.207416	1.71192	1.31938	1.15464
MRPS33	1.0846e-05	-4.96473	0.000316619	0.671806	1.92998	0.860883	2.11423	0.786155	1.23675	0.548724	0.421133	1.26055	1.57009	0.742722	1.85601	0.210463	1.69251	1.97695	1.85907	1.56576	1.26664	1.77107	2.05611	2.01167	2.41566	2.55522	2.30663	1.66221	1.03733	2.23046	2.23046	2.23046	1.42911	2.72922	1.92315	2.08341	2.06686	2.29768	1.91984	2.27886	0.719782	2.14448	1.41017	2.26665	2.04782	0.432747	2.11724	2.18521	1.73912
ENOPH1	1.08662e-05	-4.96392	0.00031682	0.556626	3.10294	2.0453	2.93939	1.76569	2.60781	1.90352	1.91896	2.71873	3.02667	2.65889	2.98783	2.20822	3.09089	2.90902	3.07424	2.81492	2.47811	2.76076	3.33846	3.31982	3.5036	3.37863	3.18991	3.17442	2.71917	3.67302	3.67302	3.67302	2.64089	4.07946	3.21655	2.97618	2.98764	3.00874	3.10203	3.67583	2.74022	2.41242	2.75654	3.4715	2.89468	1.63527	3.41088	3.16484	2.68767
AL359532.1	1.09172e-05	-4.96189	0.000317918	-0.768273	3.34718	4.39612	3.40524	3.32349	3.57994	4.72504	3.50914	3.69937	2.46052	3.78669	4.41567	4.26597	3.42392	4.0315	4.22398	4.18831	3.67567	4.70808	2.4355	3.20273	2.71336	1.07065	3.50878	2.89598	2.49332	2.59225	2.59225	2.59225	3.6866	1.94918	3.03791	2.69432	2.66338	3.68736	1.50576	2.55431	3.68206	3.41524	3.30441	1.91617	1.31255	4.05651	2.62038	2.70517	4.06826
RPA1	1.09853e-05	-4.95919	0.000319513	0.47161	4.76904	4.62402	4.6944	4.00564	4.10994	3.84276	4.605	4.22985	5.03967	4.49217	4.28712	4.19134	4.519	4.25169	4.01087	4.3481	4.32575	4.71458	5.15419	5.20956	4.61504	4.86757	4.99937	4.42939	4.67659	4.90127	4.90127	4.90127	4.74871	5.86211	4.80348	5.09099	4.33311	4.34369	4.64177	4.57471	4.49731	4.19402	4.68745	5.04179	5.14654	4.08996	4.847	4.88994	4.57118
GPR183	1.10059e-05	-4.95837	0.000319722	0.7433	3.55022	2.38276	3.49483	1.91563	2.20745	2.66311	1.82826	2.54142	2.95671	1.64339	2.97552	3.41257	3.53554	3.87997	3.21729	2.80159	3.19243	2.84614	3.6976	3.64432	3.76637	3.34592	4.25664	3.83897	2.76039	3.99217	3.99217	3.99217	3.01681	4.68571	4.03761	3.51853	4.23332	3.90952	3.98655	3.7867	2.72286	2.41242	2.42223	4.00857	3.95668	1.25748	3.90735	3.36047	2.9262
TRAV3	1.10328e-05	-4.95731	0.000320113	1.19371	0.556357	-0.210259	0.594923	-4.36345	-0.970871	-2.28127	-1.26096	-2.06551	-1.20314	-0.808887	-0.766917	1.38512	-0.314709	-0.706112	-1.99324	-0.664443	0.255338	-0.2935	0.728456	0.83889	0.673677	0.437518	0.868336	0.560461	-0.0663022	0.843842	0.843842	0.843842	-1.00387	1.82393	0.924469	0.490755	0.480997	0.00255814	1.09893	2.2966	1.42538	-0.570762	-1.41611	2.2262	0.578409	-1.41933	0.663166	0.867612	-0.427408
NPAT	1.11967e-05	-4.95091	0.000324186	0.427507	6.27392	5.77724	6.31965	5.57366	5.55302	5.85092	5.57176	5.85406	6.37093	5.67886	6.31038	5.83456	6.28177	5.66264	6.05233	5.98188	5.65428	5.85387	6.558	6.36426	6.12712	6.1118	6.69679	5.99436	6.00815	6.46781	6.46781	6.46781	5.97865	6.86051	6.30436	5.88996	6.19559	6.20924	6.21612	6.5879	6.31988	5.468	5.85121	6.6948	6.47567	5.43243	6.61023	6.67402	6.02052
MTND4P14	1.12093e-05	-4.95042	0.000324186	-0.596944	4.80681	6.31819	4.68564	4.62769	5.11945	6.01415	4.29196	5.33616	4.0752	4.86968	5.28033	5.3958	4.70061	5.25697	5.52261	5.47997	5.33126	5.74852	4.34348	4.6121	4.07424	3.4846	4.42414	4.15778	4.31096	4.60128	4.60128	4.60128	4.87854	4.88503	4.63562	4.15413	4.83732	4.53802	3.79933	4.84572	5.08804	4.72756	4.98992	3.95264	3.75974	5.7562	4.08179	3.95239	5.19585
GZMM	1.1214e-05	-4.95024	0.000324186	0.798139	3.75472	2.15947	4.41258	1.191	2.14859	2.34394	2.93597	3.5972	3.6055	3.54991	2.35122	2.07223	3.53554	2.42732	2.12782	3.88135	3.16018	3.14461	4.54466	3.12913	3.69204	3.51434	3.87269	3.86011	3.71384	3.94422	3.94422	3.94422	3.15079	4.30419	3.84727	3.71543	4.35438	3.21321	4.46536	4.36367	4.38592	2.98035	2.03634	4.33392	4.0495	1.72318	4.4704	4.5662	3.79728
RPL7A	1.128e-05	-4.94769	0.0003257	0.531533	6.93412	6.8843	6.70035	6.17403	5.63972	5.88393	6.23646	6.47868	7.38959	6.24693	6.29808	6.36981	6.235	6.58205	6.58613	6.38961	6.91425	6.79003	7.28753	7.13764	7.34469	7.00689	6.85957	6.81924	6.78352	7.08978	7.08978	7.08978	7.34154	7.20781	6.9997	7.45851	7.04785	6.85541	7.68664	6.68877	6.51151	5.6525	6.71002	7.1505	7.55691	5.86327	6.70145	6.52926	6.51224
COQ4	1.14978e-05	-4.93939	0.000331586	0.488882	3.85156	3.68901	4.0301	3.16779	2.78251	2.84764	2.85558	3.74104	3.89455	3.52831	2.91236	3.81179	3.77614	3.40379	2.90246	3.618	3.24462	3.53825	4.34348	3.96935	4.09564	3.64377	3.76978	3.93676	3.72429	3.81308	3.81308	3.81308	3.1599	4.26256	3.86524	3.78389	4.0672	3.68736	4.23947	4.09626	3.76072	3.6803	3.45911	4.18779	4.1401	2.56171	4.23438	4.11237	3.40773
IKZF3	1.15129e-05	-4.93882	0.000331614	0.703862	7.68628	6.6169	8.08107	6.16095	6.15628	6.25134	6.29098	7.13448	7.46443	7.78078	7.10558	7.87083	7.31447	6.2865	6.68603	7.22917	7.03772	6.82801	8.52235	8.0112	7.48366	7.06683	8.13148	7.8337	7.05392	7.78404	7.78404	7.78404	7.04354	8.39572	7.4428	6.80951	8.19364	7.85807	7.70236	8.50055	7.76172	6.81811	6.78324	8.47489	7.944	6.17655	8.29792	8.45353	7.13097
RIPOR2	1.15265e-05	-4.9383	0.000331614	-0.602912	10.8888	11.599	11.0639	11.4436	11.819	11.7213	11.8138	11.3677	10.6833	11.3045	11.4677	10.982	10.8448	10.4271	11.4319	11.4001	11.3848	11.9436	11.0909	10.5843	9.88438	9.30963	10.8967	10.581	11.2399	10.4019	10.4019	10.4019	11.0528	10.1981	10.3015	10.597	10.0118	10.5819	9.61493	10.2706	11.1375	10.6639	11.2381	9.97734	10.3644	12.1401	10.2807	10.285	11.3142
SNRPA1	1.16147e-05	-4.93499	0.000333381	0.513276	3.8385	3.52829	3.81149	3.22637	2.88524	3.1325	2.39404	3.17904	3.65683	3.49899	2.76282	3.63804	3.9872	3.51084	3.70206	3.70647	3.10478	3.36725	3.76236	3.8644	4.12567	3.79198	3.95541	3.87577	3.31102	4.18721	4.18721	4.18721	3.14162	4.5637	4.08822	3.5135	4.13432	3.80447	4.02707	4.54904	3.60834	3.03023	3.24184	4.32053	4.0459	2.74088	4.1696	4.09915	3.49925
TK1	1.16159e-05	-4.93495	0.000333381	1.12068	2.23571	1.69769	0.947144	2.08349	0.150949	0.469077	0.421133	1.62934	0.9008	1.24467	1.04975	0.775092	0.366977	1.99975	1.59453	1.62749	1.68449	0.429915	2.87098	3.29311	2.50063	2.31949	-0.378989	2.38543	3.00293	1.8689	1.8689	1.8689	2.23822	4.12994	2.33786	2.96884	1.10038	2.10565	2.97222	1.36225	0.121029	2.16696	2.08468	1.98567	1.61431	1.63527	1.81234	1.76696	1.47628
PHTF1	1.17014e-05	-4.93176	0.000335432	-0.792559	5.81975	7.03176	5.26383	6.4369	6.76193	7.47894	6.58633	6.51115	4.68837	6.21911	6.89301	6.05502	5.69626	6.16316	6.30857	5.96405	6.29988	6.85106	5.57956	5.27926	5.05196	4.36876	5.28887	5.66702	5.8866	4.82389	4.82389	4.82389	6.09126	4.97247	5.12584	5.45216	5.26741	5.54705	4.45729	4.97531	6.48472	5.64051	5.82181	4.43854	4.76812	7.40486	5.09475	4.99188	6.60581
TRIM59	1.17308e-05	-4.93067	0.000335869	0.574381	3.27289	2.73183	3.03438	1.72564	2.17832	2.27536	1.60604	3.10651	3.08405	2.84516	2.88629	3.28507	2.87442	2.94471	3.13095	2.91732	2.93729	2.64301	3.5366	3.39082	3.35938	3.35909	3.45293	3.23233	2.90524	3.85813	3.85813	3.85813	2.61463	4.05528	3.31137	2.95406	3.78338	3.34472	3.4712	3.90709	2.90322	2.65429	2.74656	3.66551	3.08213	1.95872	3.73042	3.17748	2.94369
KDM1A	1.1835e-05	-4.92683	0.000338447	0.4779	4.34579	3.79173	4.14098	4.22262	3.95108	3.25629	3.52078	3.55888	4.64454	4.09664	3.76482	3.6698	4.13631	4.31215	4.0169	3.88135	3.61351	4.13581	4.83396	4.72131	4.50509	4.5832	4.71276	4.44347	4.00714	4.51951	4.51951	4.51951	3.96128	5.08593	4.24402	3.99356	3.73014	4.19877	4.35683	4.39695	3.75218	3.63266	3.99001	4.80275	4.64023	3.25512	4.5306	4.59946	4.25839
CDCA2	1.1873e-05	-4.92544	0.000338786	1.02504	1.8635	0.748618	0.491573	1.55328	0.423425	-0.943459	0.732554	0.917121	0.857579	0.791903	1.93441	0.520225	0.783518	1.88196	1.05278	1.12689	0.951975	0.909496	2.46693	2.82793	1.8942	2.56662	-0.057269	1.82161	1.78074	1.94047	1.94047	1.94047	1.33572	4.00206	1.6186	2.02803	1.62858	1.80194	1.37488	0.575201	0.0109122	2.00176	2.48361	2.09755	1.1874	1.50904	1.58518	0.98733	1.37683
SLC15A3	1.18753e-05	-4.92536	0.000338786	-0.508025	6.87891	7.67145	6.82051	7.24877	6.99854	7.66133	7.23776	7.17304	7.07746	6.93919	7.83895	7.50211	7.27329	6.54475	7.15316	6.58215	7.74624	7.67773	6.61083	6.80335	6.21845	5.87786	7.08452	6.40553	7.03148	6.75265	6.75265	6.75265	7.11671	6.3125	6.35691	7.34696	6.04129	6.18717	6.33312	6.53936	7.36001	6.9728	7.09684	6.24587	6.66125	7.17866	6.24961	6.10768	7.28077
CDADC1	1.1932e-05	-4.92329	0.000339651	-0.636564	3.47648	4.79628	3.14069	3.91059	3.54613	4.45739	2.468	3.33229	3.02667	3.4385	5.42538	4.69432	3.25481	3.46242	3.95543	3.44021	3.57326	3.46302	2.5573	3.37817	3.6179	2.92656	2.95992	3.31122	3.06182	3.20565	3.20565	3.20565	3.12311	3.439	2.77817	2.92404	2.81428	3.2754	2.69886	2.98472	3.98115	3.04244	3.73629	2.88103	2.94967	4.47894	3.22298	3.12624	4.05626
ZNF827	1.19341e-05	-4.92321	0.000339651	0.637892	4.41365	3.10677	4.44407	2.87002	3.2843	3.02521	3.61604	3.61224	4.57953	4.55049	3.1167	4.57778	4.14513	3.84262	3.70206	4.12016	3.75698	3.36725	5.12	4.64151	4.78088	4.32243	4.34452	4.70538	3.79045	4.67657	4.67657	4.67657	3.77818	4.66075	4.45158	4.12144	4.87706	4.86736	5.01762	4.99174	4.55731	4.01359	3.37738	4.68531	4.645	3.02079	5.12761	5.13162	3.92159
RANBP1	1.19691e-05	-4.92194	0.000339981	0.571265	2.57456	1.86857	2.24709	2.34376	1.58637	1.2664	1.41979	1.97027	2.34007	1.97687	1.6546	1.92208	1.87336	3.08991	2.6465	2.58532	1.38298	2.39036	2.13649	3.40337	2.94662	3.35252	2.45301	2.71051	2.51756	2.69516	2.69516	2.69516	2.41603	3.76283	2.58563	3.01941	2.80401	2.24685	2.99468	2.55431	1.83388	2.50353	1.98632	2.83872	2.45861	1.98267	2.50508	2.27029	1.83592
GNPDA2	1.19742e-05	-4.92176	0.000339981	0.580647	2.85244	2.11488	2.64646	1.30411	1.77331	2.17853	1.79032	2.64748	2.63704	2.31639	2.42549	2.88601	2.55488	2.26739	2.48185	2.48884	2.56278	1.79581	2.99474	2.81859	3.24363	2.97013	3.29248	2.69882	2.21064	3.4311	3.4311	3.4311	2.44613	3.33381	3.19539	2.05599	3.37525	2.75595	2.71699	3.35018	3.19522	1.72718	2.38411	3.14248	2.93417	1.66517	3.41088	3.19624	2.69801
MLLT3	1.19965e-05	-4.92094	0.000340087	0.564101	4.24461	4.05628	4.07101	3.13758	3.4519	2.9243	3.26819	3.99174	3.73055	3.73104	3.72125	2.65163	4.2264	4.06431	3.687	4.51254	3.97657	3.24683	4.80043	4.30966	4.3585	4.51127	4.73634	3.9015	3.79045	4.46958	4.46958	4.46958	3.68028	5.1493	4.87841	4.17021	4.23714	4.32175	4.62986	4.67986	3.88298	3.64071	3.73629	4.5849	4.06025	3.60288	4.46784	4.62276	4.11916
ORC5	1.20064e-05	-4.92059	0.000340087	0.519944	3.31244	2.5428	3.14069	2.36999	2.68232	2.87879	2.17597	2.66201	3.46137	2.92449	3.1931	2.55289	3.12698	3.03578	2.88937	3.00133	2.87242	2.94897	3.05802	3.59596	3.47122	3.33262	3.74931	3.25645	2.41804	3.82826	3.82826	3.82826	2.84671	4.01286	3.32442	2.99796	3.68608	3.21321	3.48713	3.82999	3.31591	2.50353	2.89852	3.60053	3.50037	1.57353	3.55311	3.52779	2.9949
LRG1	1.20526e-05	-4.91892	0.00034099	-0.98835	7.53366	9.14572	7.16453	8.41874	8.63799	9.66037	7.63996	7.81789	6.17909	8.27138	8.80268	7.91788	7.12614	7.47487	8.3921	7.98695	7.85096	8.6205	8.16898	6.86245	6.69832	4.31231	6.95257	7.64596	8.08442	6.13178	6.13178	6.13178	8.21317	5.44349	7.33125	7.48349	6.47264	7.50758	6.05267	6.23566	7.49587	7.69222	7.83449	5.20681	5.75254	8.77962	6.46289	6.36972	8.32479
TRAV14DV4	1.21191e-05	-4.91653	0.000342464	1.17284	0.811162	-0.328437	0.737267	-2.81923	-1.10769	-0.740452	0.207438	0.397675	-0.104251	-0.808887	-1.65233	-2.4178	0.482917	-0.110107	-1.13997	1.16901	-0.610927	-0.786333	0.239198	0.0146574	0.737311	0.486358	0.707923	0.753624	-0.0663022	1.98177	1.98177	1.98177	-0.258045	1.99348	0.817757	0.944018	1.53232	0.862985	1.3047	2.2427	1.66237	0.12395	-0.718624	1.15751	1.40539	-3.13743	-0.129002	0.347199	0.428617
P2RY10	1.2166e-05	-4.91485	0.000343385	0.748409	4.74389	3.93968	5.02101	2.54129	3.6664	3.15812	2.47997	3.62713	4.26909	3.74983	4.2721	5.25894	4.41701	3.81074	4.07586	4.30152	4.4861	3.9165	4.77555	4.89345	5.08138	4.08145	5.06914	5.13211	4.29702	4.80676	4.80676	4.80676	4.32748	5.33434	5.13698	4.17659	5.47099	5.13251	5.18974	6.01228	4.12024	3.51496	3.64789	5.04992	5.04558	2.78241	5.20969	5.02723	4.09589
AC007458.1	1.22331e-05	-4.91246	0.000344868	1.66454	-0.990249	-4.36345	-1.95785	-1.60869	-4.36345	-2.97541	-2.82877	-2.51077	-1.39889	-1.56186	-3.1082	-3.08484	-2.67576	-2.0788	-1.6497	-3.14194	-2.44779	-4.36345	-4.36345	-0.122448	-1.42555	-0.71747	-1.20825	-2.27199	-4.36345	-1.69591	-1.69591	-1.69591	-1.59998	-0.0413868	-1.00099	-2.26409	-0.420644	-0.753255	0.7574	0.0969434	-2.96017	-2.41581	-1.09572	-1.07593	-0.77311	-0.813324	-0.737934	-0.734244	-2.41439
NOP14	1.23494e-05	-4.90835	0.000347355	0.51161	3.38025	2.80382	3.1492	2.88828	2.60781	1.63817	2.78015	2.74627	3.31727	3.18599	2.88629	2.58656	3.52881	3.42079	2.99091	3.13485	2.6887	3.27349	3.81215	3.63371	3.40418	3.89957	3.79994	3.26441	3.17284	3.5085	3.5085	3.5085	2.7535	4.4304	3.31791	3.1931	2.86456	3.15926	3.48184	3.39205	3.11764	3.03023	3.16149	3.77333	3.75092	2.07467	3.68258	3.69978	2.83547
HACD3	1.23504e-05	-4.90832	0.000347355	0.518223	3.48304	2.78971	3.58546	2.88828	2.8671	2.47204	2.2051	2.9495	3.14823	3.35096	3.00003	3.06388	3.18805	3.6105	3.36644	2.86703	2.77641	2.90417	3.85435	3.78993	3.78531	4.03296	3.64794	3.66365	3.02	3.63901	3.63901	3.63901	3.0268	4.43576	3.84274	3.26073	3.7247	3.39227	3.6231	3.82389	3.30428	3.23554	3.19857	3.99419	3.34496	2.07467	3.89213	3.8296	2.95235
NIF3L1	1.2368e-05	-4.9077	0.000347441	0.488143	2.84833	2.22387	2.43988	2.31706	1.97312	1.74347	2.13114	2.26501	2.64976	2.63213	2.44347	2.33249	2.94688	2.3227	2.95366	2.70468	2.42482	2.5588	2.95095	2.8827	2.96002	2.84464	3.02095	2.52437	2.18059	3.12192	3.12192	3.12192	2.27222	3.31065	2.77817	2.89338	3.14239	2.65819	3.18901	3.21676	3.18258	2.57249	2.33166	3.47495	2.86229	1.98267	3.05551	2.87778	2.32376
IGLV5-48	1.24005e-05	-4.90656	0.000347943	2.34584	-1.33419	-1.64154	-2.70843	-4.36345	-4.36345	-4.36345	-3.40099	-4.36345	-2.22498	-3.22961	-4.36345	-4.36345	-4.36345	-1.46542	-4.36345	-4.36345	-3.10859	-0.941227	-4.36345	-0.536026	-2.37747	-2.0886	-4.36345	-1.94417	-2.79583	-3.02456	-3.02456	-3.02456	-1.86975	-2.25755	-2.44298	0.00888911	-0.743205	0.0507696	-1.25843	-1.79186	-2.26246	-3.08326	-2.40847	-2.46085	-1.11613	-2.48436	-0.737934	-1.62212	-2.41439
JCHAIN	1.25504e-05	-4.90134	0.000351078	1.81126	7.87566	5.55536	8.00805	6.88507	0.372892	6.1352	5.07034	4.57138	6.20195	6.48142	7.76981	5.28737	6.53697	4.55856	6.50049	4.21871	5.84555	6.8061	8.27682	9.03191	8.31984	5.94601	3.06301	7.95444	6.93802	8.31799	8.31799	8.31799	7.71741	4.95391	6.99358	8.75504	8.01456	9.23653	8.87888	6.34629	5.16075	5.99942	8.40653	7.65405	5.9931	6.97512	7.78743	6.49179	7.68653
THEMIS2	1.25661e-05	-4.9008	0.000351078	-0.541904	8.86978	9.79471	9.16797	9.15303	9.46314	9.5877	9.40419	9.29443	8.74223	9.22781	9.27676	9.27717	8.83154	8.22545	9.1241	9.39942	9.804	9.86219	8.88698	8.53833	8.08817	7.49634	8.7267	8.7087	8.98617	8.40974	8.40974	8.40974	9.24229	8.05372	8.25361	8.81493	7.72756	8.28689	8.02667	8.2018	9.29453	9.06503	9.03423	8.05343	8.85045	9.66732	8.43532	8.14423	9.20372
IRAK3	1.25895e-05	-4.89999	0.000351078	-1.00658	9.06287	9.63835	8.18773	9.76182	10.1552	10.4975	9.86638	9.20653	8.76068	9.81422	11.0027	10.943	8.26271	9.33236	9.82924	8.66722	9.11052	10.2225	8.42519	8.68198	8.22764	7.40124	8.44632	8.33749	8.76591	8.5121	8.5121	8.5121	9.52474	7.06592	7.46138	9.02994	7.29795	8.47186	6.7745	6.61378	9.51368	8.95836	9.82347	7.40659	7.4106	10.3894	7.4785	7.48633	9.55327
ZNF146	1.2598e-05	-4.8997	0.000351078	0.495697	4.6655	4.05038	4.71748	3.58087	4.02658	3.77813	3.44343	4.18527	4.78957	4.11124	4.74058	4.2503	4.70956	4.29382	4.12694	4.32965	4.14532	4.57508	5.23628	4.93291	4.95993	4.77478	5.39148	4.55465	4.16511	5.21877	5.21877	5.21877	4.27813	5.2302	4.56314	4.20808	4.51726	4.54435	4.5283	5.16354	4.19769	3.82157	4.23813	5.04412	4.54906	3.67078	4.97529	4.77817	4.53703
SPATA13	1.26084e-05	-4.89934	0.000351078	-0.562936	7.86045	8.16869	8.24471	8.17655	8.7808	8.94929	7.36743	8.55213	7.02775	8.11772	8.80746	7.96544	8.01831	7.54582	8.40423	8.52089	8.60196	8.57723	8.27765	7.30573	7.37783	6.50527	8.20258	7.74235	8.0217	7.60097	7.60097	7.60097	7.19746	7.68135	7.71503	7.20904	7.46859	7.71534	6.60297	7.84923	8.1554	7.78911	8.04229	7.40772	6.85374	8.54093	7.78486	7.59487	8.25758
ACSS1	1.261e-05	-4.89929	0.000351078	0.479829	5.21542	4.90175	5.25596	5.02424	4.54313	4.21038	4.26801	4.81844	5.22113	5.09213	4.33608	4.85145	5.01178	5.02658	4.34876	5.08002	4.49905	5.26583	5.7215	5.48944	5.39428	5.46322	5.30824	5.26884	4.84172	5.28626	5.28626	5.28626	4.59599	5.57806	5.02751	5.02357	5.20047	5.15887	5.54845	5.55124	5.19262	4.46732	5.20199	5.76172	5.60742	3.98718	5.56431	5.4246	4.87895
UTP15	1.26153e-05	-4.8991	0.000351078	0.51449	3.11394	2.06887	3.12351	2.205	2.40899	1.99166	2.13114	2.40983	2.93608	2.83347	3.14994	2.44689	3.00622	3.1725	3.09719	2.86703	2.10163	2.57318	3.31274	3.24515	3.48981	3.66514	3.58582	3.07845	2.45617	3.39589	3.39589	3.39589	2.70453	3.7283	3.3048	2.86995	3.16664	3.07435	3.10203	3.59926	2.94873	2.79078	2.68517	3.31055	3.18393	1.63527	3.58185	3.40416	2.67726
NUCKS1	1.26515e-05	-4.89786	0.000351675	0.492895	5.97623	5.42446	5.89387	5.28761	5.29255	5.14583	5.11515	5.44731	5.95905	5.45479	5.77344	5.58467	5.98757	5.56474	5.48395	5.6606	5.67915	5.26804	6.09531	6.22637	6.25356	6.2508	6.27462	6.17818	5.59774	6.12181	6.12181	6.12181	5.43484	7.10303	5.93792	5.63471	6.18177	5.51411	6.13755	6.25848	6.01217	5.03604	5.46653	6.57104	6.14891	5.21464	6.26815	6.22041	5.65044
ITPKC	1.27343e-05	-4.89502	0.000353566	-0.69035	3.58273	4.13654	3.27902	5.05285	4.62638	3.35928	4.63742	3.46254	3.07464	4.38005	3.90769	5.32526	3.35712	3.53446	3.52718	3.36066	3.82712	5.47558	3.17681	3.01934	3.14736	3.14763	3.63684	3.69341	3.83936	3.09081	3.09081	3.09081	3.56842	2.73792	3.077	3.4726	2.82448	3.10891	2.96465	3.23528	3.14397	3.3081	3.50719	3.34497	2.85408	4.99088	3.05551	2.98235	3.54005
COX10-AS1	1.28244e-05	-4.89196	0.00035533	0.589983	4.03036	3.51119	3.39812	2.81382	3.47004	3.11952	3.10004	3.76143	4.10784	3.52103	3.18243	3.56391	3.84818	3.98654	3.81712	3.68485	3.05888	3.35065	3.97402	4.32622	3.9488	4.18124	4.00372	3.74548	3.50538	4.58574	4.58574	4.58574	3.45457	4.86132	4.53254	3.41979	4.57276	4.10199	4.1655	4.39284	3.99568	3.43389	3.35784	4.17084	4.29373	2.52956	4.45495	4.3873	3.66651
TOMM40	1.28408e-05	-4.89141	0.00035533	0.464789	3.5898	3.2373	3.44036	3.35008	2.8671	2.47204	2.95324	2.74627	3.79497	3.21332	2.7192	3.14521	3.035	3.99791	3.46678	3.04722	2.93729	3.5309	3.68429	4.1917	3.67182	3.98703	3.67531	3.66365	3.64947	3.50378	3.50378	3.50378	3.12311	4.45437	3.71477	3.82915	3.46924	3.37817	4.24573	3.58489	3.1043	3.41524	3.53645	3.98694	3.78588	2.7687	3.61003	3.58585	3.11549
PGS1	1.28425e-05	-4.89135	0.00035533	-0.825882	8.38285	9.8441	7.56135	8.96612	8.877	10.1133	9.00871	9.00663	7.36569	8.99268	9.5065	8.79844	8.34426	8.40218	9.04331	8.84521	8.83834	9.17161	8.28759	7.5936	7.86197	6.05728	7.63678	8.54493	8.99349	7.39856	7.39856	7.39856	8.85806	7.07109	8.22736	8.34957	7.91548	8.08411	6.82813	7.60321	9.05002	8.29423	8.74206	6.62727	7.10149	9.40109	7.59937	7.35545	9.3792
AC022730.4	1.28615e-05	-4.89071	0.000355442	-1.84488	0.00403839	0.56192	-0.809305	-0.95986	-1.61904	-2.28127	-2.42014	-2.51077	3.17488	-1.83296	1.52547	-2.4178	-3.28573	-0.565588	-0.337477	3.38766	2.91169	-4.36345	0.779412	-1.84923	0.0781158	-0.0273549	-1.5703	-0.343602	0.469342	-3.02456	-3.02456	-3.02456	-0.849646	-4.36345	-2.44298	-1.03658	-2.33452	0.66038	0.260488	-4.36345	-1.44124	0.376225	-2.40847	-1.55085	-1.40057	-0.813324	0.733156	-0.642502	0.0308339
PUM3	1.29089e-05	-4.88911	0.00035634	0.539096	3.64446	3.17351	3.64687	2.79459	2.78251	2.71582	2.13114	3.0413	3.6055	3.12971	3.04784	3.24346	3.77044	3.51876	3.34742	3.53184	2.71853	3.25577	3.74964	4.06323	3.93869	3.61111	4.09575	3.58329	2.9235	3.95809	3.95809	3.95809	3.08535	4.49602	3.90488	3.19939	3.66353	3.8392	3.60861	4.26348	3.43795	3.19237	3.12343	3.78173	3.46306	2.05222	3.98111	3.90376	3.11549
HIP1R	1.30469e-05	-4.88449	0.000359731	0.627613	3.74347	3.7486	4.43016	2.90631	2.35794	2.12756	3.05275	3.07428	2.89392	3.51372	3.03603	3.30543	3.37973	3.16243	3.25859	2.98962	2.70369	3.08565	3.94641	4.06323	4.37359	4.20332	3.91004	3.97603	3.84895	3.39079	3.39079	3.39079	3.0661	4.13324	3.81064	3.27863	4.26361	3.95456	4.27355	4.12137	2.91855	3.43389	3.07639	4.35283	4.33267	2.71253	4.25535	4.53707	3.269
RUVBL1	1.31619e-05	-4.88068	0.000362483	0.51295	3.46255	3.25795	3.51473	3.26879	2.83945	2.38792	2.36851	2.57253	3.40244	3.33445	2.59597	2.69858	3.43835	3.35157	2.80824	3.20739	2.73322	3.21966	3.86028	3.68598	3.6179	3.88599	3.85364	3.55114	3.31794	3.45085	3.45085	3.45085	2.97613	4.38401	3.61207	3.28455	3.84979	3.60902	3.86582	3.7992	2.87206	3.40582	3.19857	3.82029	3.4358	1.80604	3.59601	3.76406	2.91738
RN7SKP134	1.33523e-05	-4.87444	0.000367304	-0.866034	0.824493	1.89518	0.737267	1.30411	1.34557	1.70922	1.28985	-0.0942755	0.512225	1.24467	2.37015	2.39083	0.173472	0.235554	2.01182	0.736581	1.85535	0.608083	-1.80165	0.198604	0.262438	0.280216	-0.919084	-0.162117	1.76057	0.020894	0.020894	0.020894	0.842085	0.0731256	-1.28827	0.913783	-0.157187	-0.596517	-0.999732	-0.763488	0.975706	0.522818	1.53139	0.764258	0.930511	1.33394	-0.559975	-0.1252	1.15464
ZSCAN12	1.34227e-05	-4.87216	0.000368815	0.623942	2.50581	1.06218	2.26287	0.934088	1.83061	1.44354	1.49248	2.0387	2.40155	2.21185	1.77311	2.3522	2.56807	2.3227	2.42856	2.06686	1.04909	1.86757	2.76119	2.54061	2.94662	2.97013	2.74937	2.45657	1.61087	3.10956	3.10956	3.10956	2.03538	3.10394	2.31188	1.71391	2.55732	2.32734	2.8128	3.24445	2.75738	2.2949	1.82494	2.84408	2.3921	1.13461	2.93447	2.6518	2.06086
SPATA20P1	1.34544e-05	-4.87114	0.00036926	-1.33908	0.118565	-0.457167	-0.809305	1.98513	-0.185259	1.31276	0.772023	0.465529	-4.36345	1.53201	2.44347	2.6831	-1.23007	0.0730509	1.14377	-0.16852	-0.222901	-0.518974	-0.929309	0.461054	-0.954155	-1.82756	-0.291587	-1.08575	0.469342	-1.53193	-1.53193	-1.53193	-1.00387	-1.43568	1.17559	-0.923083	0.196909	0.721228	-2.93595	-0.763488	-0.539683	1.42552	-1.60766	-2.46085	-3.47624	-2.03644	-0.00987264	-0.734244	0.614738
AKT3	1.34813e-05	-4.87027	0.000369573	0.515631	5.32167	4.91156	5.12827	4.2298	4.54313	4.49808	4.04046	4.64273	5.08956	5.29553	4.77294	5.15897	5.26557	4.73539	5.11091	5.15529	5.07291	4.41664	5.82517	5.21668	5.17627	5.39291	5.70745	5.38828	4.83932	5.48963	5.48963	5.48963	4.98489	5.87401	5.65889	4.47463	5.6116	5.22471	5.71441	5.6666	5.56315	4.45824	4.374	5.88313	5.42679	3.91434	5.99924	5.76543	5.12674
NRADDP	1.37291e-05	-4.86236	0.000375934	-0.728041	1.89023	2.9506	2.36875	2.34376	2.03942	3.14537	2.26165	2.98462	0.9008	1.91161	2.93795	2.4831	1.30845	1.67087	2.83579	2.23493	2.42482	2.21804	1.3507	1.10769	1.31863	0.623679	0.664869	1.39879	2.08648	0.719146	0.719146	0.719146	2.30544	0.725995	1.94021	2.02803	1.557	1.75905	1.50576	0.453941	2.09903	2.12166	2.35812	2.18458	1.65269	2.24275	0.9248	1.51137	2.07679
IL18RAP	1.37574e-05	-4.86146	0.000376279	-1.13284	7.44078	8.3892	6.96376	9.07199	8.61065	8.42896	8.55553	8.4501	4.62856	8.27544	9.0496	8.60357	7.55409	7.07413	8.50769	7.8177	8.08009	8.65259	7.29302	6.82623	5.65436	5.04107	6.02299	6.97879	7.64319	5.28763	5.28763	5.28763	6.95211	6.30006	6.83048	7.03211	6.97476	6.25304	5.11652	6.6058	7.97103	6.52162	7.47595	4.70458	4.41313	9.81925	6.58147	6.00857	8.38702
NARS2	1.3805e-05	-4.85996	0.000377146	0.536654	2.54734	2.34464	2.19869	1.00273	1.6932	1.63817	1.34324	1.84849	2.72384	2.07947	1.93441	2.22969	2.43044	2.55596	2.27599	2.11075	2.14622	1.97977	2.66961	2.78064	2.82741	2.71744	3.0958	2.37077	2.16532	2.67851	2.67851	2.67851	1.65209	3.11735	3.15943	2.08341	3.05847	2.70414	2.52458	2.98472	2.2997	2.6383	2.01986	3.03416	2.51178	1.0003	3.07586	2.66981	2.42681
TRAJ13	1.40737e-05	-4.85159	0.000384048	1.11249	0.455608	-1.13137	0.691362	-2.09055	-1.25886	-1.46255	-1.84161	-0.0942755	0.512225	-0.316656	-4.36345	-0.90633	0.828049	-2.0788	-0.607436	-0.820548	-0.341015	-1.11477	1.38401	1.45959	0.262438	-0.418777	0.977928	0.275766	-0.387901	0.813664	0.813664	0.813664	-0.466535	1.43167	0.817757	-0.383114	-0.00497292	0.424601	0.891129	1.49112	0.0109122	-0.429206	0.0384335	0.934621	0.165723	-2.03644	0.9248	1.12423	-0.725963
FLOT1	1.42279e-05	-4.84686	0.000387812	-0.751893	7.62838	8.63548	7.45462	8.55747	8.16067	9.0423	7.53776	8.41701	6.91895	8.21868	8.77631	8.23628	7.05123	7.93586	8.38308	7.99941	8.00642	8.35988	7.69418	7.21304	7.16437	5.81472	6.8524	7.7001	8.25859	6.78606	6.78606	6.78606	8.12434	6.08746	7.45324	7.80843	6.87404	7.48253	6.30193	6.41592	8.30653	7.64297	7.99196	6.43434	6.44592	8.43508	6.85158	6.34261	8.4755
THNSL1	1.42702e-05	-4.84557	0.00038852	0.703942	1.17969	-0.101032	1.41086	-0.33384	0.922234	-0.131596	0.207438	0.326472	0.813022	0.0496806	0.901504	-0.431714	1.24418	1.03935	1.00503	-0.277448	0.480968	0.608083	1.17154	1.41073	1.8517	1.78773	1.47824	1.61323	0.859074	1.38527	1.38527	1.38527	1.0127	1.65035	1.55358	1.60458	1.16601	1.54011	1.52646	1.29323	0.648019	1.30911	0.622464	1.15751	0.693343	-0.16105	1.46692	1.92525	0.996116
LINC00861	1.44471e-05	-4.84022	0.000392753	0.830093	7.76552	6.93808	7.65737	5.74623	6.51853	6.47424	6.34759	7.32004	7.6005	7.52078	6.61513	6.067	8.00927	6.55633	7.1297	7.67106	6.81505	6.66302	8.23036	7.77616	7.7986	7.43934	8.12826	7.74661	7.0968	8.2236	8.2236	8.2236	6.78405	8.61907	8.29481	6.99468	8.3229	8.00124	8.18603	8.64021	8.10436	6.45242	6.49361	8.09277	8.0358	5.28133	8.55156	8.51116	7.394
CIP2A	1.44586e-05	-4.83987	0.000392753	0.714833	2.1307	1.2388	1.82639	0.934088	0.5652	1.16894	1.14705	1.26055	2.6242	1.31365	1.4913	1.04103	1.06973	2.3045	1.6882	1.68668	1.52481	0.491782	1.68059	2.49447	2.54576	2.35937	1.37517	1.94548	1.56507	2.50051	2.50051	2.50051	1.72755	3.6335	2.21709	2.26204	2.1503	1.98677	2.51425	2.36547	1.14167	1.89811	2.2633	1.93637	1.79676	1.33394	2.28973	2.17264	1.85452
AGPAT2	1.44878e-05	-4.839	0.000393099	-0.442907	5.0586	5.5616	5.21802	6.218	5.0568	5.54832	5.21698	4.99815	4.78957	5.41806	5.89605	5.81694	5.05457	5.13611	5.25564	4.98004	5.38107	5.44071	4.84895	4.8275	4.76951	4.39458	4.99286	4.91186	5.36035	5.11123	5.11123	5.11123	5.49726	4.38123	4.94118	5.21551	4.73832	4.63608	4.75136	4.48083	5.09817	4.79764	5.03162	4.67783	4.47334	5.63866	4.50082	4.3119	5.33483
PATJ	1.46106e-05	-4.83533	0.00039598	0.69575	4.97462	4.79628	4.37314	4.34664	3.83455	2.90929	4.02011	4.76222	4.21018	3.89757	4.41111	4.67097	5.16284	4.21806	4.97501	4.40208	3.95793	4.40864	5.09759	5.29785	5.25583	5.40725	5.14551	4.7542	4.73721	5.34942	5.34942	5.34942	4.2008	5.8471	5.79873	4.49519	5.1688	5.11136	4.66529	5.26165	4.53759	4.25822	3.95143	5.03009	5.00536	3.37758	5.56791	5.42989	4.73074
BNIP3	1.47352e-05	-4.83164	0.000398207	0.523272	2.9832	2.52587	2.96855	2.42104	2.25007	2.40941	1.64907	2.44387	1.98592	2.42949	2.74842	2.18643	2.56807	3.45419	2.48185	2.95393	2.36948	2.5296	2.95095	3.21701	3.33388	3.54924	3.49656	2.78979	2.56486	3.03304	3.03304	3.03304	2.49014	3.44964	3.51863	2.59301	2.94154	3.28551	3.49765	3.04894	2.68751	2.23235	2.58791	3.11615	3.04654	1.95872	3.21077	3.27482	2.57999
SLC12A2	1.4739e-05	-4.83153	0.000398207	0.528879	3.56041	2.88573	3.4814	2.34376	2.72324	2.69846	2.59448	3.1171	3.20105	2.90227	3.49852	3.42192	3.53554	3.46242	3.42203	2.81492	3.10478	2.42248	4.26072	3.84154	3.53528	3.78712	3.68612	3.57691	2.9235	3.55485	3.55485	3.55485	3.24797	4.19777	3.66945	3.34811	3.79898	3.50471	3.78651	3.82999	3.53066	3.31818	3.25598	3.88928	3.97193	2.69813	3.71753	3.9376	3.14602
AL359762.1	1.47428e-05	-4.83142	0.000398207	-0.678984	3.71111	3.81282	4.0301	4.7375	4.41475	5.18686	4.77491	4.5905	3.49702	4.13526	3.91416	3.92798	3.80427	3.14208	3.69455	4.37984	3.94537	4.7275	3.55133	2.42235	3.27077	2.38535	3.72332	3.99048	3.82971	3.2401	3.2401	3.2401	3.9871	2.8546	3.44883	3.63894	3.55135	3.46524	2.94171	3.4166	3.64567	4.43528	4.28371	2.38897	2.59298	4.42752	2.76939	2.93101	3.93912
NUGGC	1.47717e-05	-4.83057	0.000398536	0.88333	2.70746	1.57137	2.42593	1.9508	0.774335	1.2664	1.93644	2.61796	2.19135	2.51984	1.71507	2.75889	1.87336	1.42352	1.74743	1.28847	1.80061	1.72028	3.11864	4.00681	2.87769	2.69683	1.74949	2.5764	2.48104	2.98646	2.98646	2.98646	2.44613	2.55296	2.23102	2.98347	3.29686	3.4383	2.96465	2.82272	2.85622	2.02655	3.14638	2.96701	1.94331	1.80604	3.09592	2.73968	2.16886
NUDCD1	1.48706e-05	-4.82767	0.000400751	0.592386	2.68277	1.72761	2.33928	1.76569	1.60838	1.48462	1.53898	2.66201	2.54468	1.95544	2.62778	2.1643	2.52814	2.60139	2.63085	2.08897	1.71441	2.48466	2.97301	3.05951	3.41881	2.93538	3.01239	2.62662	2.1343	3.41109	3.41109	3.41109	2.22092	3.44433	2.93105	1.84787	2.79367	2.94	2.46147	3.198	2.57591	2.02655	2.14671	2.78959	2.62229	1.44153	2.91953	2.53876	2.40173
RNF24	1.49233e-05	-4.82614	0.00040128	-0.71499	9.90667	10.9383	10.2051	10.0985	10.6219	11.0603	10.7752	10.5496	9.32168	10.5034	10.8027	9.80743	9.7382	9.75573	10.2192	10.7016	10.7525	10.6935	9.71893	9.3589	8.88999	7.2132	9.87448	9.71244	10.6813	9.23482	9.23482	9.23482	10.0737	8.56367	9.73706	9.72255	9.22309	9.78105	8.34126	8.94115	9.97849	9.80877	10.4724	8.46862	9.2122	10.7878	9.10412	9.37919	10.4427
COX10	1.49239e-05	-4.82612	0.00040128	0.530442	4.21162	3.53677	4.25188	3.40183	3.55182	3.23237	2.95324	3.52748	4.26909	3.91987	3.61418	3.30543	4.19699	4.06971	4.02889	4.05426	3.62143	4.00402	4.64768	4.44321	4.29911	4.63285	4.48728	4.0743	3.6604	4.61884	4.61884	4.61884	3.84748	5.10625	4.50701	3.96804	4.41638	4.21473	4.43556	4.79044	3.89077	3.81447	3.84787	4.58969	4.25371	2.80944	4.48061	4.2414	3.80686
SIDT1	1.49643e-05	-4.82494	0.000401914	0.659996	5.29789	4.30974	5.53795	3.90163	4.21408	3.79456	4.02421	5.14247	4.59934	5.44329	4.01381	5.34506	4.87256	4.89289	4.40962	5.2491	4.47303	4.57864	6.14837	5.48502	5.2774	5.14169	5.4965	5.37549	4.95701	5.46921	5.46921	5.46921	4.51665	5.94434	5.2056	4.57706	5.80038	5.37547	5.57478	6.0015	5.17996	4.56362	4.48622	5.79044	5.36745	3.57164	5.99658	5.97999	4.93684
FAM151B	1.50577e-05	-4.82224	0.000403967	-0.671475	3.56889	3.7486	3.18277	3.47613	3.48201	4.70345	3.2119	3.72035	2.446	3.80478	5.40717	5.4029	2.61965	3.85518	4.25492	4.16248	3.74977	3.63738	3.44488	3.1883	2.68136	2.89072	3.61439	3.33407	3.2253	2.71978	2.71978	2.71978	3.76032	2.77223	3.50723	2.82191	2.16643	3.64087	2.1902	2.70807	3.58931	4.30456	4.16508	2.72719	3.01005	3.59513	2.43331	2.53876	4.33657
NLRC4	1.50778e-05	-4.82166	0.000404051	-0.873166	6.3649	7.41636	5.60757	6.18883	6.91601	8.09063	6.08309	6.31819	5.50991	6.78756	8.5102	8.29123	5.9133	5.80213	6.71414	6.1931	6.65262	7.36294	5.56692	6.17883	5.44757	5.38327	6.18318	5.50026	6.14088	5.73177	5.73177	5.73177	7.1272	5.50343	6.08225	5.68369	4.73832	5.35402	4.63225	5.41573	7.21156	6.71417	6.72089	5.62604	5.43507	6.80172	5.26832	4.63198	6.91809
OTUD7B	1.51006e-05	-4.82101	0.000404113	0.443613	3.41766	2.36383	3.17445	2.8328	3.22855	2.62687	3.14583	3.12761	3.4174	3.35096	2.97552	2.80252	3.17086	3.66857	2.6465	2.87977	2.74776	2.46937	4.10963	3.42198	3.18778	3.81128	3.67531	3.5049	3.55308	3.49905	3.49905	3.49905	3.21338	3.9543	3.49574	3.24867	3.39592	3.33014	3.4712	3.65534	3.31591	3.52369	2.66412	3.9251	3.69224	2.75486	3.9739	3.8296	3.27592
PHKA2	1.5114e-05	-4.82062	0.000404113	-0.461171	6.13747	6.76312	6.26488	6.8188	6.30098	6.61388	6.00863	6.36335	6.07444	6.25901	7.46765	7.10401	6.17161	5.50423	6.36166	6.16995	6.43067	6.23922	5.90765	6.02703	5.86221	4.91963	6.01766	5.7795	6.39755	5.90547	5.90547	5.90547	6.33394	5.78544	5.57537	5.8851	5.67073	5.65918	5.35077	5.88904	6.81573	6.01808	6.39162	5.76596	5.88641	6.65016	5.65726	5.69683	6.47139
AC090948.3	1.51552e-05	-4.81944	0.00040476	0.906174	2.86166	2.36383	1.73884	2.44591	1.60838	0.469077	1.34324	2.47713	2.00585	1.74679	1.85601	1.78379	3.20503	1.6129	2.67729	2.53789	1.59082	2.21804	2.49769	3.61226	3.31315	3.06161	3.35476	1.92556	1.87758	2.97968	2.97968	2.97968	2.22092	3.84572	3.02198	2.26204	2.6747	2.79893	3.80357	2.83491	2.77433	1.75711	1.84379	2.52192	2.41461	0.903261	3.45297	3.56676	2.94369
NKRF	1.51829e-05	-4.81865	0.000404876	0.46863	3.3171	3.03678	2.86897	2.58672	2.50597	2.40941	2.50361	2.64748	3.30927	3.15812	3.2142	2.61946	3.43835	3.37792	2.92829	2.92963	2.70369	3.58157	3.65047	3.82298	3.28148	3.16273	3.58582	3.33407	2.88675	3.56847	3.56847	3.56847	2.91287	4.04479	3.54117	2.63068	3.3683	3.03294	3.41123	3.49553	3.07723	2.31516	3.13112	3.53911	3.3911	2.56171	3.63309	3.60469	3.22678
ANKRD36C	1.51935e-05	-4.81834	0.000404876	0.616553	5.10569	4.3196	4.87721	3.81838	4.20688	4.08241	3.93573	4.6317	4.85422	4.92859	4.09	4.88904	5.27767	4.49979	4.81116	4.98004	4.34977	3.88802	5.11753	5.07099	5.38686	4.76985	5.47174	5.13211	4.48087	5.33355	5.33355	5.33355	4.23998	5.79173	5.23527	4.40569	5.67073	5.17799	5.33178	5.79074	5.18631	4.04426	4.4312	5.34829	5.08997	3.3594	5.75091	5.58621	4.73325
FYB1	1.52394e-05	-4.81703	0.000405647	-0.608625	10.6874	12.0779	10.629	10.3753	11.5065	11.9902	10.4106	11.4243	9.9731	10.7459	11.3362	10.4458	10.7907	10.6314	10.9425	11.5006	11.5852	11.7688	10.678	10.6666	9.66787	9.44397	10.9231	10.3787	10.4814	10.3576	10.3576	10.3576	10.9909	10.2702	10.45	10.2665	10.2108	10.5714	9.40857	10.3653	10.9159	10.5597	11.0538	9.99641	9.87074	11.8108	10.2546	10.0163	11.1455
ALG8	1.52919e-05	-4.81554	0.00040659	0.483258	3.93499	3.57018	3.92988	3.02657	3.2843	3.1325	3.35523	3.03014	4.03697	3.7056	3.40983	2.92602	3.85357	3.79127	3.89122	3.60271	3.34367	3.81729	3.82433	4.17717	3.89401	3.86305	4.44655	3.89126	3.67125	4.09925	4.09925	4.09925	3.78997	4.66075	3.98104	3.5824	3.91328	4.01657	4.27048	4.18468	3.57002	3.1703	3.80041	4.27366	4.15019	2.54572	4.27894	4.01007	3.3301
GTPBP1	1.53196e-05	-4.81475	0.000406845	-0.563373	8.37683	9.31635	9.0136	8.49964	8.76451	9.22292	8.08893	9.30647	7.30263	8.65147	8.95129	8.67721	8.39185	8.68646	8.48421	9.18939	9.09905	9.41083	8.6729	7.82243	7.8584	7.16338	8.43094	8.11395	8.73764	8.03538	8.03538	8.03538	8.11792	8.20109	8.24742	7.9511	7.7022	8.33908	7.21485	8.27244	8.17827	8.34223	8.53603	7.79019	7.43764	9.15197	7.94987	7.869	8.70186
GZMK	1.53465e-05	-4.81399	0.000406845	1.11362	3.24055	0.56192	3.4814	0.862017	0.609523	1.11763	1.97077	2.32104	3.13923	3.06115	2.44347	1.08881	2.54157	2.17024	1.9118	1.92657	3.10478	2.06364	3.45275	2.37219	2.51885	3.13237	3.25668	3.47094	1.93271	4.09298	4.09298	4.09298	3.03673	5.08934	2.71018	2.96147	4.56061	3.84604	3.58413	4.62474	4.42401	1.49822	0.863185	4.00857	4.34444	1.13461	3.21077	2.94586	2.91738
ARHGAP11A	1.53526e-05	-4.81382	0.000406845	0.693414	2.86573	2.24472	2.60991	2.05144	1.83061	1.21849	2.11588	2.0387	2.73582	2.21185	2.40728	1.86835	2.01492	2.94471	2.91543	2.1322	2.21061	2.04313	3.09871	3.7707	3.12374	3.10917	2.02956	2.85443	2.64408	3.57748	3.57748	3.57748	2.61463	4.23822	2.79702	2.78062	1.94129	2.60268	2.65252	2.77288	2.01595	2.76155	2.88037	3.2021	2.51178	2.28187	2.94187	2.32813	2.4757
TRIB1	1.54615e-05	-4.81075	0.000408847	-0.744172	6.77841	7.1852	6.81984	7.33699	7.84826	8.49014	7.20974	7.29985	6.06616	7.57359	7.35814	6.09359	6.76093	7.75503	7.22134	7.32369	7.1637	7.85848	7.16414	6.66957	5.86131	5.06337	6.68337	6.774	7.16984	6.42977	6.42977	6.42977	6.46926	5.30241	6.35453	6.99242	5.95458	7.08038	5.614	5.48314	6.63149	6.63679	7.28832	5.66364	5.89844	7.80854	6.0812	5.80772	7.50414
HADH	1.54625e-05	-4.81072	0.000408847	0.473203	3.49229	3.24767	3.14069	2.85153	2.947	2.45147	3.02851	2.82587	3.59238	2.9786	2.42549	3.36485	3.29502	3.33373	3.03911	3.43159	3.10478	2.73541	3.8484	3.6653	3.78907	4.14367	3.57423	3.65763	3.2105	3.62604	3.62604	3.62604	3.04658	4.22899	3.56336	3.50845	3.52032	3.86976	3.90983	3.86609	3.37267	2.86138	2.99442	3.88928	3.57722	2.49667	3.88446	3.69978	3.18329
STOM	1.55599e-05	-4.80799	0.000410968	-0.859795	8.58261	9.66626	7.9422	8.63857	8.05646	10.1282	7.90837	9.05492	7.87531	8.69171	10.8573	10.2361	7.58239	8.64661	9.17218	8.85331	9.18202	8.3635	8.62234	7.6815	7.83314	7.37595	7.87471	8.15383	8.59345	7.70815	7.70815	7.70815	8.83514	7.92716	8.68117	8.65948	7.94412	7.85192	7.97488	7.52541	8.69189	7.97928	8.83094	8.07466	7.50705	9.58147	7.37831	7.4539	8.94083
ATF3	1.55967e-05	-4.80697	0.000411483	-1.42765	2.9287	5.1704	3.80072	0.435151	1.84921	1.00918	0.207438	6.19367	-0.104251	1.61634	-0.766917	0.210463	2.41592	4.95546	2.72227	4.20865	5.43148	4.1928	2.19396	2.13711	1.53103	3.97852	1.68631	1.5365	1.85873	2.97287	2.97287	2.97287	1.65209	4.13983	1.25952	1.79908	2.21375	1.5569	1.32848	3.36707	-0.539683	2.35486	2.00318	3.01054	0.96142	4.82859	1.62254	1.57008	1.87289
RORA	1.56157e-05	-4.80644	0.000411529	0.799399	6.79886	5.50441	6.63592	4.99506	5.37349	5.66684	5.43706	6.72437	6.69326	6.52934	5.73197	5.33272	7.03707	5.67332	6.03163	6.63006	6.06317	5.31372	7.61003	6.52641	6.66598	6.36784	6.93456	6.95626	5.94139	7.26135	7.26135	7.26135	6.04284	7.89541	7.14839	5.86153	7.583	6.79831	7.237	7.66386	7.29981	5.63447	5.20016	7.60421	7.40744	4.80192	7.79665	7.51805	6.39163
BACH2	1.56746e-05	-4.8048	0.000412626	0.819699	5.39489	5.58222	5.85925	4.03051	4.11379	3.19572	3.85533	4.41285	4.3336	3.96881	4.89885	5.94576	4.80733	4.17864	4.65751	4.40649	3.79947	5.318	5.2544	6.09045	6.02962	5.3556	6.05357	4.9665	5.3435	4.89768	4.89768	4.89768	5.06224	5.73633	5.90246	4.3247	6.16783	5.50765	5.59575	6.21248	4.02431	4.17751	4.36425	5.5112	5.79927	3.92055	5.87026	6.22346	4.90372
AKAP1	1.57276e-05	-4.80334	0.000413565	0.526343	3.78415	3.37602	3.53437	3.52363	3.039	2.49233	2.98718	3.2577	3.71852	3.43076	3.18243	2.97768	3.77044	3.91638	3.56883	3.21746	2.85909	3.70424	3.91827	4.14018	4.19814	4.34247	4.22364	3.62712	3.44977	3.81308	3.81308	3.81308	2.95535	4.58315	4.16641	3.4983	3.77815	4.03765	4.23003	3.93001	3.33888	3.1703	3.15395	4.23136	3.84508	2.24275	3.90735	3.94131	3.06846
XPO5	1.57686e-05	-4.80221	0.000414186	0.481325	4.82481	4.34395	4.88743	4.07103	4.34437	3.8894	4.15312	4.23957	4.77222	4.49217	4.3552	3.95401	4.77358	4.64064	4.63808	4.75653	3.97657	4.82986	5.3247	5.20777	4.7465	4.94168	5.19553	4.75137	4.42429	5.08935	5.08935	5.08935	4.33554	5.72323	4.42759	4.38655	4.48227	4.44412	4.51022	5.05305	4.50749	4.44451	4.53343	5.58903	5.07061	3.3594	5.00211	4.97929	4.47526
FPR2	1.58012e-05	-4.80131	0.000414397	-0.724333	8.58433	9.69376	8.69222	9.35052	9.56337	9.70804	8.92624	9.28448	7.25606	9.19719	9.23961	8.52327	8.7104	9.04902	9.12793	9.01992	9.25445	9.65261	8.59793	8.43007	7.30324	6.82837	8.99732	8.5808	8.7452	8.08972	8.08972	8.08972	9.15899	7.58542	8.3407	8.19767	7.8062	8.46784	6.75709	8.21207	8.75089	8.82163	8.79704	7.64372	6.99348	9.58965	7.911	7.68423	9.05331
TCERG1	1.58218e-05	-4.80074	0.000414397	0.494202	5.66364	5.26015	5.57792	4.48503	4.89611	4.97255	4.83438	4.83136	5.70845	5.33339	5.14675	5.05758	5.82817	5.60804	5.49047	5.41143	4.93359	5.40899	5.76639	5.99631	5.85953	5.71706	5.97203	5.5773	5.1992	5.90189	5.90189	5.90189	5.24884	6.51474	5.78699	5.10778	5.84864	5.47931	5.82091	6.05981	5.48293	4.72377	5.47562	6.09957	5.98654	4.25637	5.98766	5.81482	5.20675
CCNE1	1.58287e-05	-4.80055	0.000414397	1.01869	0.918659	0.0953606	-0.459418	0.934088	0.209717	-0.261442	0.318238	-0.690726	0.396197	-0.0335562	-0.0116025	-0.730199	0.426111	0.235554	0.413241	-0.523591	-0.943233	0.226603	1.62595	2.64991	0.993321	1.5557	-0.678309	0.883218	0.896531	0.873402	0.873402	0.873402	-0.466535	2.45075	0.854212	1.52681	1.16601	0.992051	1.64481	-0.16919	-0.717846	1.22594	1.41017	0.851953	0.111636	0.500661	0.733156	0.475596	0.325702
DCAF17	1.58998e-05	-4.79861	0.0004158	0.464922	4.2651	3.48515	4.29088	3.22637	3.59103	3.57437	3.21906	3.68521	4.48329	3.65997	4.04948	4.0294	4.36129	3.98083	3.91078	4.20359	3.54856	4.00402	4.29177	4.36521	4.29383	4.55772	4.7467	4.17476	3.47475	4.46716	4.46716	4.46716	4.15597	4.75597	4.37524	3.76284	4.55143	4.14704	4.23003	4.73945	4.15948	3.81447	3.90282	4.8246	4.66157	2.99748	4.67763	4.37089	4.00306
ZNF639	1.59624e-05	-4.7969	0.000416596	0.447453	3.99705	3.37602	3.94952	3.55825	3.14066	3.25629	3.08445	3.47905	3.73055	3.45386	3.76482	4.06566	3.78181	3.91037	3.88463	3.39656	3.76415	3.57444	4.04862	4.12511	4.25359	4.30892	4.01662	3.96143	3.90516	4.28668	4.28668	4.28668	3.72393	4.39231	4.31766	3.72852	4.02361	3.84262	4.22053	4.0447	3.95165	3.34799	3.62083	4.41354	4.13333	2.98568	4.18217	3.95972	3.65595
ADGRG3	1.59677e-05	-4.79676	0.000416596	-0.918607	8.47177	9.50188	8.42316	9.60834	9.711	10.071	8.6188	9.18279	7.34138	9.04623	10.1263	8.86598	8.19233	8.36012	9.02808	8.55826	9.09319	9.21238	8.33573	8.10055	7.59601	5.36543	8.05408	8.49975	9.07347	7.29382	7.29382	7.29382	9.01565	6.74434	7.94263	8.21889	7.38966	8.27869	6.4522	7.09774	9.23837	8.87443	8.85219	6.58231	7.39193	9.51374	7.7846	7.58897	9.42095
B4GAT1	1.59826e-05	-4.79635	0.000416596	0.676398	0.749659	0.268194	0.594923	-1.60869	0.472248	-1.46255	-0.187506	0.172568	0.566917	-0.0335562	0.61455	0.373642	0.641032	0.31042	0.258955	-0.523591	-0.11373	-0.192734	0.779412	0.683028	0.82779	1.68686	0.664869	1.21404	0.655646	0.843842	0.843842	0.843842	0.231162	1.51507	1.08646	0.269847	0.883425	1.26154	1.41984	0.389261	0.408454	1.34897	-0.0987905	1.01281	0.96142	0.432747	1.0671	0.836063	-0.257968
DEXI	1.60376e-05	-4.79486	0.000417573	0.443225	3.68816	3.51119	3.6648	2.92412	2.95561	2.87879	2.97877	3.3593	3.43955	3.53554	3.01213	3.41257	3.15347	3.91037	3.72434	3.19725	2.89872	3.60276	4.42575	3.67049	3.93869	3.78223	3.90079	3.92175	3.49931	3.5594	3.5594	3.5594	3.43969	3.93171	4.16278	3.67994	3.9695	3.76527	4.38261	4.00747	3.59886	3.48844	3.29074	3.96744	3.85746	2.49667	4.14414	3.97429	3.31674
NT5DC4	1.60588e-05	-4.79429	0.000417668	-0.829202	1.62799	1.86857	2.27848	1.84261	2.13349	2.53206	3.28875	2.91351	1.09939	2.21185	0.61455	0.294359	1.45762	2.28606	1.9118	3.26679	2.05562	3.00308	1.41656	1.81916	1.06947	1.60075	1.3482	0.923952	2.36558	0.431863	0.431863	0.431863	2.09359	0.498988	1.4855	1.54665	1.4022	0.967145	0.047814	1.10466	1.69835	1.84335	2.03634	0.830524	-0.00302801	2.31997	1.36037	1.36431	2.19829
H2BC14	1.60867e-05	-4.79353	0.000417938	1.14803	4.18604	3.51977	3.28676	4.44242	0.266184	1.9335	2.71076	2.46059	2.67488	3.43076	3.57393	3.11091	1.89446	3.91638	3.34742	3.34236	3.48922	2.94897	4.9663	5.40931	4.95325	3.30566	1.90559	4.60249	4.61332	4.06443	4.06443	4.06443	3.77818	5.61279	4.10345	5.13097	4.32954	4.54435	5.1419	3.01718	1.73344	3.33812	4.70817	4.11432	3.04654	3.72857	4.09181	2.98235	3.42651
TMEM223	1.61445e-05	-4.79198	0.000418983	0.567212	1.85861	1.01443	1.46643	0.221373	0.519473	0.695928	0.650219	0.964793	2.15611	1.86641	1.14074	1.78379	1.51322	1.75369	1.31017	1.65739	1.74372	1.66765	2.2672	1.9446	2.16106	2.10168	2.01249	1.86409	1.65525	1.76233	1.76233	1.76233	1.20099	2.3177	2.0226	2.11032	2.1175	1.77349	2.64307	1.8447	1.92779	1.04365	1.33223	2.0427	2.01872	0.207416	2.31277	2.14715	1.90894
PYCR1	1.61653e-05	-4.79141	0.000419069	1.14535	1.44273	0.748618	-0.0952508	1.409	-0.432442	-0.131596	0.650219	-0.846578	-0.286173	0.527293	0.848498	0.940459	-0.0500672	1.55249	0.679692	-0.277448	-0.341015	0.151924	2.2672	2.94408	1.41907	2.41088	-0.678309	1.45546	1.98581	1.03907	1.03907	1.03907	1.23587	1.57461	1.43825	2.28584	1.62858	2.23647	2.20312	0.389261	-0.238277	1.81518	2.65348	1.1402	0.409366	1.25748	1.01185	0.737054	1.45205
EIF3M	1.62041e-05	-4.79037	0.000419619	0.425734	5.4143	5.3203	5.2099	4.78212	4.62097	4.65028	4.31886	4.76558	5.67305	4.88675	5.27532	5.11061	5.15412	5.00702	5.11372	5.33717	5.23391	5.27466	5.49634	5.68574	5.62732	5.29863	5.62841	5.25494	4.80526	5.92854	5.92854	5.92854	5.44605	6.08319	5.35618	5.28949	5.40457	5.36955	5.61883	5.70531	5.02923	4.64592	5.18731	5.79805	5.52576	4.733	5.38841	5.21982	4.96493
ARRB2	1.62376e-05	-4.78948	0.00042003	-0.606939	9.27841	10.5203	9.12693	9.8039	9.57983	10.2291	9.49471	10.0697	9.21027	9.59858	10.0737	9.61958	8.79748	8.91787	9.7289	9.63085	10.2045	10.5084	9.07797	8.86072	8.34304	7.75208	9.10139	9.26577	9.53712	8.64725	8.64725	8.64725	9.77814	8.41638	8.86867	9.42703	8.42256	9.12352	8.4085	8.2341	9.74974	9.3469	9.48928	8.52755	9.07838	10.0451	8.44903	8.49799	9.84064
MFSD9	1.63337e-05	-4.78692	0.000421974	-0.723387	4.30828	4.04444	4.83562	4.20816	5.49069	6.55482	5.0464	4.12884	3.24364	5.29978	5.98161	3.93453	3.84276	3.42079	4.61042	3.95543	3.91349	5.09945	3.63672	4.02316	4.32005	3.17768	4.00804	3.69341	4.10638	4.79522	4.79522	4.79522	4.93004	3.68393	4.44263	3.47778	4.46933	3.86302	3.53389	3.88966	5.40888	3.75637	4.17628	3.55553	3.24173	4.55677	3.7932	3.7472	4.02375
SRSF8	1.63482e-05	-4.78653	0.000421974	0.63463	4.86071	4.3196	4.45441	3.94588	3.82518	3.63036	4.69246	4.72809	4.89219	4.38005	3.87494	4.31198	4.52915	4.37454	3.62518	4.35268	4.62253	4.31762	4.8872	4.51141	4.75229	4.50239	5.00801	4.61498	5.30048	4.74213	4.74213	4.74213	5.51689	4.86729	5.24217	5.3085	4.8348	4.7949	5.32589	4.70333	4.51759	4.14957	4.42183	5.51036	5.52317	4.27588	4.86465	4.72534	4.43256
CENPM	1.63665e-05	-4.78604	0.000421991	1.08957	1.06244	0.000503456	-0.0169542	0.435151	-0.730916	-2.97541	0.148674	0.172568	0.131732	0.203	0.410256	0.448795	-0.220997	1.38939	0.552609	-1.70179	-0.0122418	-0.2935	1.13288	1.89217	1.71614	1.72805	-1.79229	0.753624	1.19596	0.617999	0.617999	0.617999	0.886667	3.04202	1.41403	1.92569	0.959426	1.47092	1.66362	-1.29015	-0.539683	1.42552	1.41017	1.15751	0.799793	0.565522	0.297872	1.17555	0.57041
ZNF280B	1.64173e-05	-4.7847	0.000422843	0.781613	1.44102	0.913901	1.54597	-0.95986	0.519473	0.384776	0.148674	0.763856	0.334486	1.41131	0.255983	-0.573251	1.76301	0.800535	1.00503	0.791546	0.735609	-0.0101368	2.07663	1.89217	1.94898	2.14795	1.79013	1.66221	0.655646	1.30077	1.30077	1.30077	0.886667	2.24627	1.66038	0.851343	1.60511	2.05926	1.4418	1.96053	1.29049	2.14448	0.747839	1.97595	0.578409	-0.988481	2.20606	1.89495	0.378077
PLEKHA1	1.66632e-05	-4.77824	0.000428713	0.612127	4.9729	4.10269	4.96665	3.41448	4.17036	4.47788	3.83684	4.45101	4.95249	4.72207	4.32642	4.02326	4.92219	4.77888	4.27015	4.77028	4.30131	4.44036	5.50393	5.05518	5.13257	5.08137	5.31522	5.18124	4.26873	5.31482	5.31482	5.31482	4.55859	5.14604	5.13142	3.94953	5.47585	5.14783	5.17997	5.41978	5.33081	4.37864	3.78098	5.23358	5.20744	2.90025	5.81787	5.80874	4.71046
URB1	1.6725e-05	-4.77663	0.000429146	0.506879	4.69787	4.57959	4.78734	4.01398	4.04283	3.54554	3.78472	4.00889	4.36094	4.31424	3.927	4.05968	4.43512	4.94669	4.39117	4.63782	3.83395	4.84475	4.86083	5.19159	4.89863	5.30885	5.01231	4.52517	4.4716	4.61884	4.61884	4.61884	3.84748	5.50471	4.76331	4.64535	4.73562	4.60816	4.81375	5.00529	4.35245	4.34454	4.12326	5.15171	4.74831	3.23532	5.02147	5.2137	4.30986
ITFG2	1.67632e-05	-4.77564	0.000429146	0.515457	4.6485	4.33911	4.6944	3.92834	3.5855	3.22025	3.97854	4.10244	4.85422	4.57528	3.51562	4.69046	4.5756	3.95189	4.26002	4.22372	3.98273	4.57508	4.82186	4.6781	4.82548	4.46633	4.95985	4.58672	4.25438	4.79136	4.79136	4.79136	4.09553	4.9908	4.57684	4.22357	4.66361	4.48637	4.8388	5.15627	4.92302	3.98858	3.8385	5.04179	5.00351	3.42204	5.02147	5.26791	4.05224
ATP2B4	1.67696e-05	-4.77548	0.000429146	-0.656793	8.23422	8.70716	8.00688	8.66727	9.35115	9.6793	8.95854	8.18417	7.67007	8.91693	9.64857	8.32746	8.14692	7.28721	8.76605	8.71931	8.41334	8.38353	8.65468	7.58054	6.93595	6.60124	8.02432	8.22305	8.66353	7.63777	7.63777	7.63777	8.58547	7.66261	7.82759	7.39495	7.77664	8.01706	7.14962	7.42613	9.12668	8.00524	8.47027	8.02703	7.91246	8.69925	7.94619	7.80092	8.81081
RPF2	1.67801e-05	-4.77521	0.000429146	0.532011	2.38049	1.50381	2.23114	1.91563	1.71365	1.31276	1.02167	1.74307	2.30832	2.17525	2.27292	1.84071	2.41592	2.60139	1.85907	1.71539	1.26664	2.60152	2.70957	2.74166	2.64864	2.73775	2.4403	2.00365	1.82026	2.67011	2.67011	2.67011	2.36967	3.19528	2.57474	2.37731	2.50755	2.25716	2.31445	2.38218	2.25209	2.07489	1.68562	2.61259	2.33424	1.04647	2.47476	2.18521	2.01197
PHF21A	1.6789e-05	-4.77497	0.000429146	-0.653533	8.5033	9.34423	8.42864	8.83137	9.43475	9.89358	8.88324	8.98421	8.05644	8.98477	9.11049	8.9633	8.16926	8.26451	9.1192	9.22695	9.03232	9.42118	9.03438	8.16458	7.68215	6.59708	8.23123	8.48515	8.74022	7.77575	7.77575	7.77575	8.90757	7.38315	8.15249	8.21657	7.60314	8.4546	7.19922	7.58483	8.93034	8.53785	8.80773	7.53489	7.83869	9.46703	7.77088	7.68811	8.9903
AP000640.2	1.68001e-05	-4.77469	0.000429146	-1.1724	0.229536	0.68903	0.824914	-1.60869	0.812755	-0.131596	-0.733103	1.33499	-2.65476	0.742722	-1.65233	0.294359	1.429	3.05767	1.27033	2.11075	0.334534	0.365277	0.00236146	-0.443281	-0.380995	0.223725	0.749729	0.707703	-0.580312	-0.337041	-0.337041	-0.337041	-1.59998	0.229468	0.119093	0.118998	0.317335	0.460736	-2.23265	0.389261	-2.26246	0.718075	0.333372	-1.24762	-1.75521	0.286502	-0.328455	-0.642502	0.0948263
ZNF507	1.6806e-05	-4.77454	0.000429146	0.405156	5.21825	4.97842	4.78187	4.62225	4.59089	4.50309	4.31886	5.02088	5.11272	5.29126	5.49602	4.95497	5.14315	4.16861	5.03568	4.92886	4.57031	5.165	5.31178	5.7399	5.30916	4.75498	5.40299	5.23888	4.90741	5.30401	5.30401	5.30401	4.95642	5.69221	5.26942	4.86669	5.53449	5.46047	5.11311	5.59312	5.22381	4.74633	5.08804	5.24578	4.96208	5.13407	5.65049	5.45217	5.36759
TRBV6-5	1.6876e-05	-4.77273	0.000430473	1.0377	1.11571	-0.328437	1.43891	0.221373	-0.432442	-1.8146	-0.626615	1.01094	-0.104251	0.468006	0.255983	-0.431714	0.783518	0.31042	0.552609	0.116194	-0.943233	-0.646469	1.41656	0.91093	0.673677	0.788541	1.04662	1.36959	1.41828	1.38527	1.38527	1.38527	-0.0759148	2.47178	2.15999	0.944018	1.71882	0.967145	1.75418	0.250493	0.648019	-1.96124	0.333372	2.01447	1.4713	0.0349145	1.33808	2.17264	0.428617
PRKCE	1.69159e-05	-4.77171	0.00043103	-0.61333	5.87244	5.41988	6.79496	7.04924	6.62087	5.82116	6.48085	6.61191	5.49764	6.35724	4.73694	7.25167	6.15204	6.16063	5.84932	6.40621	6.17902	6.42611	5.96243	5.09439	5.48281	5.79183	6.40625	5.36072	5.18224	5.94429	5.94429	5.94429	4.383	5.8166	5.77277	4.6245	6.06514	5.62276	5.22183	6.46579	4.89617	5.96456	5.52901	5.64227	5.14654	7.21196	5.95508	5.55869	5.36434
TSR1	1.69905e-05	-4.76979	0.000432468	0.480043	3.7295	3.20576	3.52785	2.65228	3.27744	2.66311	3.10777	2.8766	3.64417	3.39937	3.37277	3.25398	3.70629	3.94015	3.45794	3.58726	2.91169	3.97724	3.89535	4.23444	3.68802	4.28841	4.03787	3.82828	3.2688	4.05479	4.05479	4.05479	3.35496	4.64926	3.65403	3.62501	3.27471	3.5682	3.65636	3.87792	3.28075	3.25665	3.35784	4.23136	3.81578	2.69813	3.98111	3.97066	3.28966
GK-IT1	1.70698e-05	-4.76777	0.000434023	-0.872606	3.62035	5.41299	3.36194	3.91059	4.19239	4.29365	4.89597	4.41285	2.90458	4.75034	3.17168	3.23287	3.77044	4.30759	4.15456	4.82729	4.08933	4.66173	3.36372	3.19553	2.84917	0.971211	3.21997	3.94172	3.49321	2.67851	2.67851	2.67851	3.32288	2.30604	3.06149	3.39264	2.64048	3.36393	1.23093	2.72126	3.80263	3.84266	3.55944	1.7997	2.42574	5.5291	2.69242	2.71387	4.45407
GRPEL2	1.70917e-05	-4.76722	0.000434106	0.465659	3.93402	2.925	3.86416	3.24065	3.4458	3.30297	3.02034	3.92099	3.51799	2.94638	4.10137	3.13387	3.81537	3.63255	4.0169	3.64063	3.51495	3.60975	3.61584	4.31962	4.13456	3.90856	4.07534	3.66966	3.72949	4.35376	4.35376	4.35376	3.44715	4.78356	4.21628	3.45696	4.24475	4.1275	4.26741	4.16549	3.72628	2.98035	3.72108	4.13195	4.01309	3.3317	4.22531	3.73869	3.80208
LCMT2	1.71094e-05	-4.76676	0.000434106	0.469464	3.01877	2.5428	2.64646	3.01	2.30501	2.53206	2.21944	2.85146	2.63704	2.36595	2.21128	2.53576	2.48707	3.16243	2.69244	2.8924	2.62711	2.83425	3.04766	3.21701	3.48981	3.47253	3.02095	3.14026	2.48104	3.26261	3.26261	3.26261	2.57431	3.59569	3.4666	2.70318	3.41629	3.18108	3.54408	3.23528	2.6695	2.60577	2.71619	3.39692	3.21632	1.21767	3.35092	3.07985	2.41432
EIF3B	1.71432e-05	-4.76591	0.0004345	0.533743	5.54813	5.17583	5.35314	5.05285	4.84141	4.57143	5.18261	5.06256	5.75336	5.21892	5.04147	4.48264	5.14755	5.48011	4.94053	5.13152	4.75078	5.56284	5.90478	5.82859	5.49321	5.73612	5.79366	5.37365	5.47312	5.63154	5.63154	5.63154	5.8239	6.20436	5.52821	6.12172	4.81959	5.1269	5.21547	5.45181	4.95683	4.70854	5.12511	6.01127	6.27345	4.38772	5.64255	5.50704	5.05012
MR1	1.72065e-05	-4.76431	0.000435643	-0.447148	6.74025	7.57187	6.99243	6.81164	7.00425	7.48401	6.6453	7.62274	5.91361	6.71291	7.27835	6.85049	6.74795	7.20682	7.07511	7.38808	7.14322	7.77424	6.97763	6.57711	6.47504	6.37596	6.97808	6.56695	6.62727	6.67137	6.67137	6.67137	6.53113	6.67236	6.43796	5.99839	6.35621	6.33381	6.12403	6.61378	6.43894	6.43747	6.69062	6.70145	5.95232	7.52847	6.52031	6.35031	7.04094
CYP26C1	1.72447e-05	-4.76334	0.000436147	-0.722382	1.98404	2.18126	1.41086	2.65228	2.14859	3.66652	2.10046	2.88901	1.24066	1.41131	2.49612	3.48577	1.80817	2.93291	2.73696	1.59696	2.59531	2.3575	1.4484	1.48341	1.866	2.22192	0.375474	1.88487	2.55318	1.6977	1.6977	1.6977	2.35388	0.827372	2.31188	2.27399	2.28932	1.82984	1.78887	1.77046	1.89716	3.00551	1.93451	0.221896	1.1874	2.20253	0.983413	0.836063	2.16886
SLC1A4	1.72869e-05	-4.76228	0.000436751	0.750769	3.92268	3.5452	3.75124	3.59205	2.74327	2.45147	2.468	2.97301	3.45414	3.4766	3.46369	2.71389	3.16219	3.99791	3.25859	3.57947	3.02346	3.07558	4.51114	5.15683	3.84069	3.67044	3.60872	3.94172	3.92795	4.18426	4.18426	4.18426	3.85311	3.9049	3.33736	4.23278	3.67485	4.02262	4.31876	3.58489	2.94873	3.47048	4.27332	4.15152	3.69684	3.44808	3.59601	3.60001	3.48738
UNC93B1	1.73158e-05	-4.76156	0.000437018	-0.629112	7.33838	6.97441	7.93514	7.97936	8.15997	8.13163	6.86484	8.56451	6.47826	7.48103	7.90615	8.07551	7.75088	7.13075	7.49687	8.13808	8.32186	8.17159	7.50514	6.63476	6.71669	6.27533	7.96177	7.16872	6.85661	7.2267	7.2267	7.2267	6.52056	7.09628	7.2121	6.50369	6.95691	6.88355	6.32501	7.55749	7.28806	7.53696	7.46306	7.0131	6.42667	7.73113	7.0493	6.78403	7.46306
NCL	1.73495e-05	-4.76071	0.000437404	0.51481	5.95558	5.62458	6.0498	5.61261	5.31614	4.52787	4.91373	5.42618	5.76802	5.63068	5.84284	5.32276	5.65977	5.52009	5.44422	5.83426	5.35993	6.16521	6.67951	6.64865	6.09484	6.30371	6.45682	5.9445	5.80769	6.21206	6.21206	6.21206	5.51157	7.13098	5.692	5.61606	5.02145	5.62774	5.39648	5.81864	5.29895	5.1334	5.6437	6.50537	6.04542	5.11795	6.26667	6.0894	5.61132
ZGRF1	1.74714e-05	-4.75767	0.000439758	0.476746	3.26497	2.70199	3.09734	2.44591	2.33172	2.62687	2.98718	2.57253	3.24364	2.50517	3.235	3.07578	2.885	3.0247	3.30861	3.00133	2.252	2.48466	2.83531	3.39082	3.67182	3.69662	2.68618	2.8857	2.9235	3.5411	3.5411	3.5411	3.14162	3.99118	2.82484	3.36497	3.12599	3.15375	2.97222	3.55572	3.33888	3.05454	3.45298	4.1385	3.19697	3.02079	3.29417	3.51788	2.75853
SPATA5	1.74797e-05	-4.75747	0.000439758	0.53458	3.43967	2.77546	3.19926	2.88828	2.29147	2.04757	2.44377	3.15869	3.23522	3.22232	2.91236	3.35512	3.38719	3.22182	3.10853	3.18704	2.74776	2.77327	3.8484	3.69621	3.5036	3.62208	3.81478	3.35656	3.02846	3.59088	3.59088	3.59088	2.51875	4.11998	3.98104	3.04055	3.85974	3.50471	3.70712	3.91286	3.42728	2.71656	2.70593	3.74498	3.4845	1.95872	3.94101	4.02063	2.68767
AMPH	1.75351e-05	-4.75609	0.000440318	-1.36424	1.20908	-1.64154	0.321183	2.87002	2.93833	0.695928	3.75055	1.40579	2.74771	1.91161	1.85601	3.44045	0.240899	2.34067	-0.219345	1.36295	0.334534	2.25419	-1.52944	-1.43782	0.912929	2.22192	-2.37587	0.923952	1.1656	0.5464	0.5464	0.5464	0.363227	-2.95619	-0.216728	1.4233	0.317335	0.530399	-0.0106416	-1.79186	0.492807	2.00176	1.64321	-1.15922	-0.337286	0.207416	-1.31184	0.301729	0.378077
PPP1R15A	1.75389e-05	-4.756	0.000440318	-0.610408	6.53414	6.87598	6.52743	6.75058	6.8831	7.48338	7.67617	7.12664	6.74161	7.3011	6.51344	6.02464	6.72237	6.87734	6.69827	7.16362	7.58149	7.49626	6.34407	6.44534	5.62101	4.78945	6.35554	6.95503	6.91024	5.87291	5.87291	5.87291	6.824	5.42069	5.84248	7.15997	6.24672	6.44283	5.70876	5.77342	6.58541	6.60423	6.88514	5.49341	6.20971	7.38647	5.58694	5.76333	7.1728
RN7SL141P	1.7573e-05	-4.75515	0.000440711	-0.597983	1.66623	2.65605	1.80499	2.205	1.86758	2.58969	2.13114	2.18676	1.09939	2.09914	2.00876	1.78379	2.01492	2.02219	1.93747	2.1322	2.35055	1.89072	1.51004	1.28081	1.16513	0.164932	1.72874	1.18082	1.98581	1.27884	1.27884	1.27884	1.5449	1.32014	0.958355	1.81553	1.28893	1.08759	0.891129	1.0638	2.25209	1.81518	1.8989	0.914394	0.930511	2.56171	1.38232	1.24926	2.38902
TRAJ6	1.76001e-05	-4.75448	0.000440927	1.16106	0.331465	-0.931081	-0.265875	-1.2481	-0.970871	-2.97541	-2.42014	0.0889865	-0.104251	-0.121891	-2.4473	-0.730199	0.305315	-2.52283	-0.466151	-0.395276	-0.341015	-0.941227	1.38401	0.461054	-0.314958	-0.097601	1.04662	-0.343602	-0.580312	0.35012	0.35012	0.35012	-1.3728	1.45298	0.817757	-0.627982	0.803196	0.349496	0.401656	0.840086	0.223333	-1.6161	-1.41611	0.463788	0.866632	-1.69514	0.698585	0.98733	-0.180169
TMEM185B	1.77031e-05	-4.75195	0.000442205	-0.698392	6.69116	8.36173	6.78475	6.46454	6.67987	7.58251	6.35248	7.65806	5.3899	6.79737	7.42698	6.95811	6.56683	7.56697	7.06132	7.8733	7.41212	8.34057	6.8605	6.38417	6.21006	5.6068	6.42007	6.38835	6.24074	6.20626	6.20626	6.20626	6.67151	6.80359	6.42741	6.39091	5.88928	6.30801	5.41325	6.45595	6.35973	6.36886	6.79963	5.75676	5.27666	7.1252	5.93015	5.64315	7.31853
AC090948.1	1.77102e-05	-4.75178	0.000442205	0.901171	2.4633	2.52587	1.54597	0.435151	1.11904	0.199779	1.31679	2.81291	1.69812	1.74679	0.848498	1.34634	2.59409	0.994642	1.88568	1.74355	1.59082	2.25419	2.37052	2.8827	2.78287	2.26454	2.82954	1.82161	1.85873	2.51933	2.51933	2.51933	2.03538	3.17619	2.43732	1.58553	2.24445	2.44926	2.87062	2.34856	2.32293	0.834956	1.62153	2.35935	2.49075	1.21767	2.92702	2.80631	2.07679
FAM98B	1.77239e-05	-4.75144	0.000442205	0.517495	3.90582	3.29839	3.6648	2.92412	3.40866	2.9243	2.89186	3.18911	4.20588	3.26649	3.62997	3.5035	3.91679	3.89829	3.61727	3.32384	3.18176	3.4475	4.30921	4.35879	4.19814	3.91749	4.35472	3.68751	3.27592	4.31658	4.31658	4.31658	3.17794	4.63767	3.99335	3.35376	3.7247	3.91278	3.74736	4.23615	3.81906	3.36752	3.63713	4.34718	3.99453	2.16115	4.36688	4.23537	3.70802
MTAP	1.77253e-05	-4.75141	0.000442205	0.548288	4.54272	3.79173	4.2199	3.47613	3.86686	3.49617	3.56077	3.94496	4.76639	4.32263	3.40983	4.37596	4.49503	4.46744	4.11012	4.39766	3.79247	3.71725	4.54834	4.79456	4.65472	4.48748	4.84882	4.48489	4.07405	4.86862	4.86862	4.86862	3.94556	5.36557	5.24217	4.01864	5.04998	4.7645	4.93486	4.87849	4.2471	3.82157	3.92512	4.79448	4.61616	3.21525	4.99679	4.75306	3.96504
RPUSD4	1.78197e-05	-4.7491	0.000444096	0.476455	2.98818	2.24472	2.88944	2.28985	2.42147	2.04757	2.54976	2.52562	3.20967	2.63213	2.54691	2.14183	2.76416	3.07924	2.54998	2.71893	2.23145	2.72257	2.95095	3.03554	3.27613	3.36563	3.36824	2.89598	3.10245	3.2514	3.2514	3.2514	2.5468	3.09719	3.25795	2.8381	3.26726	2.68135	3.35447	3.22605	2.91855	2.65429	2.49558	3.41142	3.06088	1.29622	3.41621	3.15209	2.72859
CEP57	1.78388e-05	-4.74863	0.000444107	0.43854	4.7646	4.3245	4.72605	3.74013	4.09052	4.11548	4.09595	4.31508	4.82366	4.07693	4.88247	4.58196	4.8699	3.96932	4.28022	4.42833	4.51188	4.28741	4.71467	5.07296	5.24356	4.70169	5.09775	4.8445	4.38859	5.30265	5.30265	5.30265	4.57571	5.33721	4.65641	4.28981	4.80421	4.594	4.49979	5.20406	4.87668	4.20492	4.38047	5.03243	4.65921	4.58833	4.99856	4.79878	4.47526
ZNF551	1.79273e-05	-4.74649	0.000445845	0.621435	2.95237	2.36383	2.67032	2.28985	2.37087	1.56344	1.95371	1.74307	2.82827	1.97687	2.46123	2.97768	2.98671	2.49307	2.63085	2.70468	1.95896	2.72257	3.17681	3.17373	3.5036	3.06965	3.36151	3.12287	2.11854	3.4943	3.4943	3.4943	2.62782	3.52702	3.44883	2.5641	3.09263	2.79185	2.97974	3.52594	3.03565	2.12166	2.16181	3.22691	3.23542	1.3707	3.41621	3.5129	2.68767
OTUD1	1.79698e-05	-4.74546	0.000446436	-0.517934	4.62691	5.18125	4.15796	5.36134	4.55167	4.97255	5.19537	5.37637	4.96782	4.62702	6.0653	6.06401	4.34222	3.32473	4.81809	4.22372	4.56622	5.28124	4.893	4.93938	4.16091	3.90408	4.66985	4.37166	4.8489	4.43778	4.43778	4.43778	4.66799	3.93171	4.57684	4.77295	4.5545	4.713	4.25195	3.95257	4.24101	5.03909	4.62889	3.87626	4.65449	5.13407	4.17275	4.40891	5.0092
C8orf33	1.80513e-05	-4.74349	0.000447996	0.474814	3.05714	2.89894	2.94918	1.91563	2.08722	2.45147	2.31607	2.60298	3.38733	2.60487	2.49612	2.61946	2.92655	2.89692	2.83579	2.71893	2.10163	2.85793	3.02672	3.05951	3.69605	3.40427	3.30655	3.12287	2.70868	3.31202	3.31202	3.31202	2.57431	3.5764	3.26474	3.02649	3.38906	3.19187	3.51847	3.25356	3.20775	3.01792	2.40963	3.18953	3.05373	1.85875	3.26493	3.19624	2.42681
IGHJ4	1.82763e-05	-4.73811	0.000453069	1.30883	1.31897	0.184364	2.13153	0.332218	-1.10769	-0.261442	-0.52745	-1.45094	0.566917	0.273953	0.335181	0.210463	-0.220997	-1.03638	0.904521	-1.1949	-1.37574	1.49713	0.828629	2.45886	2.17262	-0.71747	0.749729	0.883218	1.36583	0.391571	0.391571	0.391571	0.796082	-1.15218	1.87073	1.37972	1.71882	1.8707	2.95705	2.16755	-2.26246	-0.181987	1.41017	1.56034	0.991681	-1.18788	1.50742	1.29639	0.614738
[truncated: 5,683 more rows]
[truncated: 34 more columns]
